# Supplementary material for: Transcriptome-Wide Survey of Mouse CNS-Derived Cells Reveals Monoallelic Expression within Novel Gene Families
Source: PLoS One. 2012 Feb 22;7(2):e31751. doi: 10.1371/journal.pone.0031751 (PMC3285176; doi:10.1371/journal.pone.0031751)
Supplement: Dataset S1 — Expression and classification of monoallelic expression for genes evaluable in NSC cell lines 2A1, 2A5, 3A1 and 4A5a. (XLS) [file pone.0031751.s011.xls]

## Sheet: List of genes
Dataset S1: Expression and classification of monoallelic expression for genes evaluable in NSC cell lines 2A1, 2A5, 3A1 and 4A5a.
NCBI.refseq: NCBI refseq gene ID
mouse.gene.symbol: official mouse gene symbol
chr: chromosome
num.cellline.eligible: number of cell lines in which the refseq gene was evaluable (RPKM >=3; pooled SNP coverage >=10)
num.cellline.mono: number of cell lines in which the refseq gene showed monoallelic expression (PB6 or PJF1 >= 0.85, p-value <=0.05 )
num.cellline.mono.trend: number of cell lines in which the refseq gene showed a trend to monoallelic expression (0.7 <= PB6 or PJF1 < 0.85, p-value <=0.05)
b6.prob.: estimated PB6 from short reads covering SNPs within the refseq gene
p.value.: P-value from exact binomial test H0:PB6=PJF1=0.5 for the refseq gene
n.SNP.: number of evaluable SNP positions within the refseq gene
pooled.SNP.depth.: total number of short reads covering SNP positons within the refseq gene
rpkm.JF1, rpkm.2A1, rpkm.2A5, rpkm.3A1 and rpkm.4A5a: expression level (RPKM) for JF1 forebrain, and the respective cell lines
NCBI.refseq	mouse.gene.symbol	chr	num.cellline.eligible	num.cellline.mono	num.cellline.mono.trend	b6.prob.2A1	b6.prob.2A5	b6.prob.3A1	b6.prob.4A5a	p.value.2A1	p.value.2A5	p.value.3A1	p.value.4A5a	nSNP.2A1	nSNP.2A5	nSNP.3A1	nSNP.4A5a	pooled.snp.depth.2A1	pooled.snp.depth.2A5	pooled.snp.depth.3A1	pooled.snp.depth.4A5a	rpkm.JF1	rpkm.2A1	rpkm.2A5	rpkm.3A1	rpkm.4A5a
NM_027855	0610007C21Rik	chr5	4	0	0	0.609756	0.634615	0.585987	0.603175	0.0598083	0.0703942	0.0376452	0.129918	1	1	1	1	83	54	160	65	66.4539	78.8079	142.345	142.407	150.912
NM_001081394	0610007L01Rik	chr5	4	0	0	0.421986	0.643478	0.519062	0.447368	0.010322	7.78224e-10	0.515858	0.167911	15	15	15	12	286	461	345	191	16.3786	11.3064	21.2184	21.13	12.3764
NM_021446	0610007P14Rik	chr12	4	0	0	0.468553	0.578723	0.634259	0.522727	0.286648	0.0186642	9.62261e-05	0.544094	7	7	7	7	321	239	223	227	39.5254	59.3926	47.2186	40.0114	68.1289
NM_025319	0610009B22Rik	chr11	4	0	1	0.252427	0.595238	0.467742	0.519608	6.53515e-13	0.279956	0.703537	0.766604	3	3	4	3	208	44	63	103	23.4417	55.7744	18.2024	24.3017	41.5486
NM_025323	0610009D07Rik	chr12	3	0	0	0.65	0.636364	0.666667	0.444444	0.263176	0.548828	1	0.814529	1	1	1	1	20	11	3	18	65.3374	119.145	95.8819	87.5116	118.391
NM_024179	0610009O20Rik	chr18	4	0	0	0.548246	0.579874	0.561772	0.512945	0.00394176	7.5442e-06	0.0119647	0.546285	19	19	19	19	917	807	442	621	22.0229	36.9126	48.0891	28.9758	35.6044
NM_027860	0610010F05Rik	chr11	4	0	1	0.596154	0.684211	0.655172	0.75	0.211609	0.0335524	0.136046	0.00222143	5	7	6	8	53	38	29	40	24.2491	12.6068	6.77716	8.30576	7.67417
NM_001177607	0610010K14Rik	chr11	0	0	0	0.3	0	NA	0.25	0.34375	0.25	NA	0.625	1	1	0	1	10	3	NA	4	0.742304	1.68253	1.36841	0.251414	1.02131
NM_026686	0610011F06Rik	chr17	4	0	0	0.660377	0.470588	0.311475	0.606061	0.0270083	0.864166	0.00444402	0.296206	2	2	2	2	54	34	63	33	27.9264	27.5111	28.9457	45.8962	22.4175
NR_027897	0610012G03Rik	chr16	4	0	0	0.631148	0.625	0.632754	0.578288	5.94015e-07	3.6883e-08	1.09417e-07	0.000705749	3	4	3	3	366	493	408	480	32.6312	37.4774	48.8593	45.125	64.183
NM_026696	0610030E20Rik	chr6	4	0	0	0.425	0.538462	0.571429	0.424242	0.218518	0.749259	0.663624	0.48685	7	6	3	5	80	39	21	33	6.89807	9.51171	10.6046	7.61487	7.9083
NM_020003	0610031J06Rik	chr3	4	0	0	0.387665	0.418994	0.370717	0.364045	1.94374e-06	0.00254232	4.20322e-06	1.04744e-08	4	4	4	4	460	362	324	451	20.902	88.2003	101.473	90.4684	143.935
NM_028754	0610037L13Rik	chr4	4	0	0	0.62766	0.656915	0.629167	0.597744	8.44366e-07	1.18024e-09	7.56303e-05	0.0017143	10	11	10	10	377	379	243	269	19.4011	37.1832	52.4037	29.2554	50.7174
NM_025345	0610037P05Rik	chr16	4	0	0	0.538462	0.553073	0.53202	0.471483	0.281776	0.178339	0.399714	0.388024	4	4	4	4	221	180	206	265	40.012	46.2763	40.6492	50.8556	60.9514
NM_001081108	0910001L09Rik	chr5	4	0	1	0.532338	0.574468	0.7	0.68	0.397378	0.179665	0.000187756	2.18172e-06	3	1	2	3	206	98	91	177	34.2511	63.1909	62.3144	72.5376	93.7018
NM_134054	1110002B05Rik	chr12	4	0	0	0.693878	0.577778	0.6	0.548148	2.93868e-06	0.043871	0.0248758	0.301683	3	3	3	3	148	181	136	136	24.6795	21.301	30.6122	39.0775	33.2146
NR_030694	1110002L01Rik	chr12	1	0	0	0.529412	0.642857	0.380952	0.625	0.716301	0.42395	0.38331	0.454498	2	2	2	2	68	14	21	16	1.65631	3.62873	0.97447	1.34278	1.28186
NM_183275	1110002N22Rik	chr11	4	0	0	0.368794	0.441176	0.5	0.55814	0.00231311	0.607591	1	0.542384	4	4	3	3	141	34	39	43	6.79965	18.6527	8.18305	8.53869	10.2101
NM_133697	1110003E01Rik	chr5	4	0	0	0.572881	0.554479	0.536765	0.536517	0.0143334	0.0302566	0.0944117	0.185095	12	13	14	13	300	414	547	359	60.3933	15.368	29.6269	36.4444	26.9923
NM_026502	1110004E09Rik	chr16	1	0	0	0.488889	0.125	0.666667	0.6	1	0.0703125	0.507812	1	1	1	1	1	45	8	9	5	27.6737	42.8372	18.3876	26.366	20.2758
NM_019772	1110004F10Rik	chr7	4	0	0	0.442708	0.404959	0.480663	0.409639	0.129419	0.0450517	0.655734	0.123853	3	3	3	3	196	122	183	83	87.9268	94.2088	86.1936	127.871	72.3239
NM_028865	1110005A03Rik	chr11	4	1	0	0.510638	0.5	0.916667	0.466667	1	1	0.00634766	1	2	2	1	2	47	24	12	16	15.5731	29.0587	18.046	15.7097	21.4169
NR_027810	1110006O24Rik	chr5	0	0	0	0.428571	0	0	NA	1	0.25	0.125	NA	1	1	1	0	7	3	4	NA	1.09783	3.6774	5.96673	1.96171	2.22664
NM_145955	1110007A13Rik	chr7	4	0	0	0.53004	0.56	0.578704	0.619469	0.107833	0.0101115	0.00124037	1.27417e-05	14	14	13	13	757	477	439	344	10.4449	30.6838	30.0243	25.4155	23.904
NM_026738	1110007C09Rik	chr13	4	1	0	0.517483	0.575163	0.896373	0.616822	0.738137	0.0749616	1.37143e-31	0.0199004	4	4	4	4	143	154	199	108	6.87062	23.6056	29.1977	52.2481	24.068
NM_026124	1110008F13Rik	chr2	4	0	0	0.568655	0.608108	0.605178	0.573487	0.000257239	0.00023803	0.000259137	0.000122903	5	4	5	4	727	304	311	700	28.1026	74.5946	39.1996	48.8781	109.756
NM_029096	1110008J03Rik	chr5	4	0	1	0.680328	0.684211	0.787879	0.576923	8.40739e-05	0.167068	0.00131873	0.212683	7	5	6	7	122	19	34	80	11.5318	11.64	4.25859	4.23652	11.4539
NM_025373	1110008L16Rik	chr12	4	0	0	0.464088	0.488372	0.625	0.352941	0.372465	0.914212	0.0443709	0.00386558	13	12	11	11	182	91	72	105	4.6917	9.20575	7.76341	6.02764	8.08497
NM_178066	1110012D08Rik	chr10	4	0	0	0.435754	0.586538	0.666667	0.471698	0.099833	0.0950437	0.0293049	0.627431	3	3	3	3	180	104	50	107	4.73146	28.6416	24.7551	14.0431	33.8041
NM_026787	1110012L19Rik	chrX	4	4	0	0	0	0.985294	0.0060241	1.17549e-38	6.77626e-21	2.13908e-37	3.57081e-48	6	6	6	6	129	69	137	167	8.03168	20.574	12.3975	21.0449	38.5727
NM_001081041	1110014N23Rik	chr19	4	0	0	0.483221	0.537037	0.457143	0.510949	0.602193	0.201255	0.240682	0.864405	14	14	14	13	300	330	212	137	16.8298	14.6204	22.5506	16.4716	11.6309
NM_178065	1110018G07Rik	chr12	4	0	0	0.503119	0.572079	0.568581	0.50258	0.871942	0.000244926	6.96331e-05	0.897763	29	28	29	28	973	666	864	979	58.1311	26.5218	31.9178	37.8113	40.305
NR_027930	1110020A21Rik	chr17	0	0	0	0	NA	NA	NA	0.25	NA	NA	NA	1	0	0	0	3	NA	NA	NA	1.5697	1.39223	0.943589	1.35223	0.528187
NM_001163741	1110021J02Rik	chr17	4	0	0	0.434679	0.527778	0.311377	0.530303	0.00841611	0.412882	1.21459e-06	0.542507	18	17	18	16	424	255	168	136	8.91995	14.6033	13.4427	11.2152	8.02375
NM_026782	1110021J02Rik	chr17	4	0	1	0.622222	0.616667	0.47541	0.75	0.135156	0.092461	0.798153	0.00222143	6	8	8	7	45	61	61	40	15.7767	11.9615	8.98519	11.6644	5.49283
NM_183116	1110021L09Rik	chr10	4	2	0	0.509804	0.632812	0	1	0.921191	0.00337419	8.88178e-16	4.44089e-16	10	11	8	10	103	129	51	53	11.9287	8.6808	11.2217	5.84158	6.28149
NM_025402	1110031I02Rik	chr11	4	0	0	0.345238	0.453608	0.381579	0.488095	1.01887e-06	0.416775	0.0504524	0.913202	6	6	6	6	255	97	77	84	6.75967	23.5392	12.03	9.76782	10.1371
NM_023483	1110032A03Rik	chr9	4	0	0	0.536585	0.468354	0.469027	0.509259	0.755229	0.474106	0.572656	0.923401	5	6	6	5	41	160	116	108	33.8376	4.08898	19.4894	12.4331	12.7782
NM_199197	1110032A13Rik	chr18	4	1	0	0.978022	0.570175	0.660377	0.660099	7.33256e-71	0.0398355	6.41488e-05	5.93702e-06	8	7	7	7	276	229	161	205	17.0446	26.7871	27.9187	22.04	33.5411
NM_027269	1110034A24Rik	chr12	4	0	1	0.559322	0.5	0.363636	0.263158	0.434993	1	0.286279	0.0635681	2	2	2	2	59	10	22	19	2.44575	14.8115	5.72718	6.34703	9.5835
NM_028637	1110034G24Rik	chr2	4	0	0	0.529801	0.51087	0.48	0.576087	0.515163	0.917041	0.887725	0.174984	12	12	8	11	153	94	51	92	4.96427	6.34014	6.12524	4.03929	6.55124
NM_176830	1110036O03Rik	chr11	4	1	0	0.140527	0.39823	0.52381	0.479167	3.69864e-101	0.0380186	0.589287	0.885433	6	6	6	6	806	113	168	49	8.48693	84.3492	18.2576	25.9177	10.8948
NM_001081183	1110037F02Rik	chr4	4	0	0	0.640995	0.673745	0.588988	0.632841	2.17102e-16	1.93666e-15	7.40267e-07	6.49327e-10	33	32	32	32	850	523	790	545	14.261	17.8148	14.5873	22.2337	19.8981
NR_027943	1110038B12Rik	chr17	4	0	0	0.401408	0.606936	0.4	0.406977	0.0231257	0.00603784	0.00326407	0.105225	3	3	3	3	142	175	225	86	5.02814	11.7032	20.6491	31.261	9.70923
NM_175133	1110038D17Rik	chr10	4	0	0	0.447059	0.42	0.495413	0.515528	0.1033	0.0600272	1	0.752689	15	15	14	15	257	151	111	162	4.98547	12.481	8.3709	6.85232	12.5262
NM_054099	1110038F14Rik	chr15	4	0	0	0.545455	0.57329	0.660714	0.513333	0.0533481	0.0119081	8.15667e-08	0.686175	10	9	10	10	480	310	282	304	9.62013	30.3393	29.1068	26.9688	29.0386
NM_025411	1110049F12Rik	chr4	4	0	0	0.5	0.528689	0.51049	0.443038	1	0.405324	0.86725	0.176044	5	5	5	5	246	246	145	158	57.7313	41.0232	36.1197	35.0344	35.3458
NM_175123	1110051M20Rik	chr2	4	0	1	0.7	0.60241	0.55	0.586957	0.00109324	0.0784196	0.635828	0.301996	4	4	4	3	70	85	41	46	33.9069	10.1895	18.1181	11.9568	11.1878
NM_001013577	1110054O05Rik	chr4	4	0	0	0.54386	0.571429	0.508621	0.478873	0.399373	0.313503	0.926078	0.812589	9	9	9	9	115	63	117	73	8.36227	13.1904	12.624	15.9004	14.7486
NM_001167767	1110057K04Rik	chr12	0	0	0	NA	0.25	NA	NA	NA	0.625	NA	NA	0	1	0	0	NA	4	NA	NA	0.648522	0.747437	0.942234	0.938168	0.680552
NM_172401	1110057K04Rik	chr12	0	0	0	0.222222	NA	0.555556	0.444444	0.179688	NA	1	1	1	0	1	1	9	NA	9	9	0.329416	0.289031	NA	0.550657	0.328958
NM_026503	1110058L19Rik	chr1	4	0	1	0.269231	0.488372	0.592593	0.56	0.0289593	1	0.442068	0.690038	1	1	1	1	26	44	29	25	22.6564	35.6211	28.7293	26.3475	38.2445
NM_025423	1110059E24Rik	chr19	4	0	0	0.68323	0.612663	0.54491	0.518519	6.89759e-50	1.99813e-07	0.11242	0.486685	12	12	12	12	1625	540	338	410	24.3502	77.0141	33.1033	25.4451	31.6397
NM_025419	1110059G10Rik	chr9	4	0	1	0.439024	0.75	0.6875	0.583333	0.532709	0.012541	0.210114	0.405032	3	3	2	3	43	28	17	37	4.23864	3.61329	3.06171	4.03433	4.87371
NM_001142727	1110065P20Rik	chr4	0	0	0	0.75	0.666667	0.666667	NA	0.625	1	0.6875	NA	1	1	1	0	4	3	6	NA	13.1251	21.9416	15.72	18.8412	23.741
NM_173752	1110067D22Rik	chr11	4	0	2	0.633292	0.692607	0.714976	0.725641	4.54456e-14	6.04492e-10	9.62845e-19	1.87827e-19	26	22	26	25	806	260	419	393	28.8017	28.1881	12.8497	20.5284	22.1603
NM_025427	1190002H23Rik	chr14	4	0	1	0.740806	0.641026	0.610127	0.465116	1.19512e-31	4.37235e-11	6.43307e-10	0.590036	8	8	10	8	576	552	808	86	28.7555	47.0296	62.8022	107.822	14.2784
NM_001033145	1190002N15Rik	chr9	4	0	0	0.519126	0.370504	0.48	0.374302	0.657499	1.86307e-05	0.683232	0.000952895	17	19	18	18	185	280	151	181	18.6292	6.97839	13.2497	9.19888	11.0966
NM_026876	1190005F20Rik	chr1	4	0	0	0.417559	0.644068	0.62381	0.577922	0.000424982	0.00224267	0.000406877	0.0634752	15	14	14	15	471	118	215	155	14.8969	17.3865	6.18646	12.4086	9.8652
NM_197988	1190005I06Rik	chr8	2	0	0	NA	0.352941	1	0.411765	NA	0.332306	0.03125	0.629059	0	3	2	3	NA	17	6	17	3.92137	0.692594	4.70972	2.29406	5.15004
NM_001163721	1190007F08Rik	chr4	0	0	0	NA	NA	1	NA	NA	NA	0.25	NA	0	0	1	0	NA	NA	3	NA	0.261848	NA	0.0934268	0.102991	0.0522969
NM_001135567	1190007I07Rik	chr10	0	0	0	0.666667	NA	NA	NA	1	NA	NA	NA	1	0	0	0	3	NA	NA	NA	0.739489	0.907388	1.07622	0.593195	0.963888
NM_028807	1200009I06Rik	chr12	0	0	0	NA	1	NA	NA	NA	0.25	NA	NA	0	1	0	0	NA	3	NA	NA	1.65112	0.115946	0.715101	0.42447	0.862157
NM_025817	1200009O22Rik	chr6	4	0	0	0.367347	0.616898	0.430844	0.47216	0.0111745	6.46782e-12	1.59508e-07	0.257345	14	23	24	23	101	879	1473	452	12.2112	4.72377	49.1637	85.0334	29.4354
NM_026177	1200011I18Rik	chr14	4	0	0	0.565436	0.525896	0.564103	0.494764	0.00158849	0.448855	0.00905167	0.878035	46	37	42	38	604	254	431	387	18.806	10.2643	6.95035	11.0454	9.7305
NM_024262	1200011M11Rik	chr11	4	0	0	0.366477	0.43662	0.539823	0.577586	6.18654e-07	0.153444	0.451853	0.114083	10	9	9	10	360	145	116	117	9.01724	28.4266	16.6728	12.9867	17.0729
NM_025818	1200014J11Rik	chr11	4	0	0	0.411111	0.604651	0.5	0.576923	0.020597	0.222053	1	0.33175	6	5	7	5	180	43	85	52	10.7754	12.4583	6.57581	7.13612	5.47122
NM_025819	1200016B10Rik	chr1	4	0	1	0.286853	0.323529	0.612245	0.495146	1.08485e-11	0.00490338	0.152408	1	14	9	6	12	252	68	50	103	9.45605	12.5197	6.29035	5.14634	7.97464
NM_001081158	1300001I01Rik	chr11	4	0	0	0.394231	0.589744	0.606383	0.602837	0.0027799	0.00359396	0.0494501	0.0180561	9	8	8	9	208	274	95	141	15.6434	27.055	43.108	15.7418	27.4227
NM_198003	1300003B13Rik	chr17	2	0	1	0.48	0.714286	0.285714	0.5	0.817554	0.453125	0.00184155	1	10	2	8	1	75	7	57	4	10.5949	3.79535	2.06703	4.37496	1.6353
NM_027906	1300010F03Rik	chr14	4	0	0	0.506329	0.615625	0.516854	0.664474	0.936624	4.17132e-05	0.559955	6.12504e-05	16	19	19	18	161	324	367	157	6.79615	3.51502	10.4352	12.3735	5.50986
NM_025831	1300014I06Rik	chr13	4	0	2	0.754448	0.406593	0.781935	0.613014	4.41128e-18	0.00241523	1.5912e-58	2.32594e-11	10	10	10	10	284	275	784	881	2.85766	15.0566	16.8775	62.3014	74.7621
NM_028200	1300018I17Rik	chr8	4	0	0	0.506726	0.624138	0.597884	0.605263	0.893497	2.7978e-05	0.00865312	0.0116731	15	15	15	14	227	292	194	154	19.5988	9.64129	16.6172	13.4355	10.5657
NM_027905	1300018J18Rik	chr15	4	0	1	0.2	0.588235	0.583333	0.352941	0.109375	0.391528	0.541256	0.332306	1	1	1	1	10	34	26	18	8.40178	8.73601	15.4997	17.7247	17.3141
NM_026894	1500001M20Rik	chr6	4	0	0	0.490196	0.570093	0.5	0.484848	0.750874	0.17564	1	0.840822	5	5	5	5	358	107	92	100	10.2979	47.9589	26.5451	19.1536	28.4829
NM_028047	1500002O20Rik	chr7	4	0	1	0.693642	0.650246	0.459459	0.738095	3.78123e-07	2.22469e-05	0.447806	1.4656e-05	12	11	11	11	174	209	114	84	7.99784	8.30065	15.8843	8.37792	7.21798
NR_015498	1500004A13Rik	chr3	1	0	1	0.448276	0.5	0.714286	0.756098	0.511842	1	0.000440285	0.00145049	13	13	13	11	58	72	70	41	18.5626	1.47866	2.32608	3.46776	1.83528
NM_001145198	1500009L16Rik	chr10	4	0	0	0.358079	0.39548	0.383838	0.306641	1.29768e-09	0.00664565	0.0265251	1.16145e-18	6	6	5	6	460	179	102	514	12.0876	31.5804	17.9252	11.5143	58.3171
NR_027817	1500011B03Rik	chr5	4	0	0	0.586735	0.572816	0.628866	0.564246	0.0181888	0.043067	0.00040686	0.099833	13	13	11	11	197	211	196	181	71.7236	18.8707	21.6677	25.0833	27.7712
NR_027818	1500011B03Rik	chr5	4	2	1	0.140426	0.320652	0.25	0.120567	8.27686e-31	1.28653e-06	5.63628e-07	2.93756e-21	10	10	10	10	237	186	101	142	40.4041	13.3953	13.9989	10.141	12.09
NM_026883	1500011H22Rik	chr5	4	0	0	0.548246	0.6121	0.56	0.583082	0.043927	0.000205005	0.0828076	0.00293945	4	4	4	4	460	285	226	335	69.4749	78.2629	64.6095	51.9298	84.4179
NM_001081005	1500012F01Rik	chr2	4	0	0	0.496835	0.47549	0.471074	0.352941	0.955151	0.528715	0.585626	0.000342979	3	4	3	4	319	206	122	153	32.2646	83.7324	99.4574	56.4403	67.8071
NR_029432	1500015A07Rik	chr18	0	0	0	0.52381	0.833333	0.666667	0.555556	1	0.0385742	0.237885	1	4	3	4	2	21	13	18	9	3.65372	1.91114	1.68387	1.71345	1.64345
NM_025892	1500031L02Rik	chr16	4	0	0	0.475	0.585987	0.488372	0.473684	0.401773	0.0376452	0.860311	0.445205	10	9	8	10	327	158	130	250	47.8749	19.1936	14.3679	10.4201	23.3341
NM_026914	1500032L24Rik	chr15	4	0	2	0.648536	0.773973	0.720974	0.669421	1.51254e-15	6.18213e-42	4.42874e-25	5.54181e-17	4	4	4	4	725	588	542	608	140.448	189.249	182.501	178.307	261.086
NM_023831	1500035H01Rik	chr9	4	0	0	0.551198	0.532951	0.667476	0.578014	0.0316734	0.2389	9.56474e-12	0.010322	7	8	9	7	462	357	416	283	28.4637	22.2927	22.4052	24.1676	25.0023
NM_026547	1520402A15Rik	chr4	4	0	0	0.42	0.558824	0.391304	0.454545	0.322236	0.396125	0.404873	0.590053	4	5	4	4	50	68	23	57	13.2431	6.01661	10.3661	4.96837	10.4068
NM_027207	1600002K03Rik	chr10	2	0	0	NA	0.454545	0.444444	0.666667	NA	1	0.814529	1	0	1	3	1	NA	11	18	3	3.88541	2.68976	5.0632	5.1731	1.10603
NM_025904	1600012F09Rik	chr13	4	0	0	0.46932	0.510319	0.538462	0.539179	0.0355028	0.664947	0.0958716	0.0764744	26	25	23	24	1223	536	506	542	14.1263	38.709	22.3979	25.9033	27.4332
NM_001083882	1600012H06Rik	chr17	0	0	0	0.25	NA	NA	NA	0.625	NA	NA	NA	1	0	0	0	4	NA	NA	NA	0.611854	3.50469	2.33364	1.22195	2.286
NM_177718	1600021P15Rik	chr16	4	0	0	0.458333	0.533333	0.470199	0.515152	0.665466	0.598412	0.515163	0.902159	3	5	5	5	49	90	151	66	22.0695	8.4544	13.9384	24.4577	13.9096
NR_029433	1700003G18Rik	chr7	0	0	0	0	0	0	NA	0.015625	0.125	0.125	NA	1	1	1	0	7	4	4	NA	0.32825	1.00215	0.778005	1.00059	0.435498
NM_027040	1700007K13Rik	chr2	2	1	0	NA	0.529412	1	1	NA	1	0.015625	3.8147e-06	0	2	2	2	NA	17	8	19	2.71209	0.210765	3.49973	2.7557	6.6047
NM_027050	1700008A04Rik	chr11	4	4	0	0	0	0	0	3.38813e-21	3.72529e-09	7.27596e-12	4.76837e-07	1	1	1	1	70	29	38	22	1.63119	6.52466	3.84723	5.55724	3.26744
NR_024331	1700008J07Rik	chr7	0	0	0	0.5	0.857143	NA	NA	1	0.125	NA	NA	1	1	0	0	4	7	NA	NA	0.992232	0.882577	1.35532	1.85847	0.259055
NR_015551	1700012B15Rik	chr12	3	0	2	0.509434	0.78125	0.820513	0	1	7.06949e-06	7.02548e-05	0.0625	4	5	4	1	54	64	39	5	6.801	5.36949	9.51539	5.36861	1.59372
NR_015573	1700012D14Rik	chr7	0	0	0	0	NA	NA	NA	0.000488281	NA	NA	NA	2	0	0	0	12	NA	NA	NA	2.54221	1.79602	2.81187	1.12716	0.572356
NR_003639	1700013N18Rik	chr5	2	2	0	0.0930233	0.00653595	0.09375	0.222222	3.10815e-08	2.6975e-44	2.55601e-06	0.00592461	2	2	2	2	76	162	92	41	0.980657	1.90525	5.37022	3.04789	1.6072
NM_028820	1700017B05Rik	chr9	1	0	0	0.5	0.55814	0.777778	0.333333	1	0.542384	0.0308838	0.387695	4	5	4	3	22	43	18	13	1.52647	2.35879	4.67728	2.46126	2.60905
NM_029601	1700019E19Rik	chr12	4	0	0	0.549296	0.490196	0.636364	0.451613	0.27525	1	0.0355827	0.7201	2	2	2	2	144	52	68	31	6.93844	37.0705	28.9876	22.6444	14.8254
NM_029331	1700019G17Rik	chr6	0	0	0	0.941176	0.85	1	0.9375	0.000274658	0.00257683	3.05176e-05	2.46335e-07	4	4	3	8	17	20	16	32	3.48164	1.08448	2.6423	1.32661	2.13805
NM_027966	1700019O17Rik	chr1	1	1	0	0.0490196	0.166667	0.136364	0.0833333	3.45987e-23	0.00753784	0.000855446	3.5882e-05	1	1	1	1	102	19	22	24	0.152041	3.34774	0.887555	1.1329	1.25513
NM_026443	1700020C11Rik	chr11	2	1	0	0.133333	0.888889	0.75	0.55	5.41777e-07	0.0390625	0.0768127	0.823803	7	2	4	3	45	9	16	20	32.9056	6.5953	3.74326	2.09496	4.19068
NM_025492	1700020L24Rik	chr11	0	0	0	1	NA	NA	0.857143	0.25	NA	NA	0.125	1	0	0	2	3	NA	NA	7	1.09299	0.606712	0.259056	1.42787	3.57692
NM_027405	1700020O03Rik	chr12	4	0	0	0.551724	0.52439	0.588235	0.527919	0.13086	0.584783	0.0104208	0.476267	15	14	15	14	233	165	221	197	16.1503	12.1358	11.5288	15.8975	15.4101
NM_029801	1700021C14Rik	chr3	3	1	0	0.666667	0.6875	NA	0.916667	0.301758	0.0501025	NA	0.00634766	1	1	0	1	15	32	NA	12	2.23643	9.27715	13.5382	5.15895	9.35582
NM_026411	1700021F05Rik	chr10	4	0	0	0.577273	0.573913	0.646341	0.595745	0.0258664	0.0293377	0.000220706	0.0281953	7	7	7	7	222	236	165	142	23.3107	23.8394	36.7054	22.5012	34.3775
NM_172615	1700021K19Rik	chr16	4	0	0	0.492288	0.551724	0.603666	0.532731	0.693335	0.0347691	9.75261e-10	0.18335	23	23	25	22	794	439	898	450	24.5657	27.1153	20.8468	48.5338	26.2258
NM_029602	1700022C21Rik	chr17	4	0	1	0.561404	0.423729	0.157895	0.47619	0.427043	0.297595	2.43426e-05	1	2	2	2	2	57	61	38	21	11.0997	11.3317	11.767	14.9671	8.75157
NM_197990	1700025G04Rik	chr1	4	0	1	0.72765	0.52584	0.364683	0.538991	2.46244e-182	0.160924	1.9778e-18	0.113909	54	45	54	40	3893	786	1058	437	16.826	55.0488	16.3359	23.9685	10.6206
NM_183254	1700025K23Rik	chr10	4	0	0	0.384615	0.425	0.375	0.583333	0.581055	0.429591	0.454498	0.774414	1	2	2	2	13	41	16	12	13.4216	3.17244	14.537	9.46934	7.76738
NM_029368	1700029F09Rik	chr1	0	0	0	0.666667	0.4	0.5	NA	1	1	1	NA	1	1	1	0	3	5	6	NA	3.58536	36.7487	6.48235	6.44533	10.2454
NM_027285	1700029I01Rik	chr4	0	0	0	NA	NA	0.666667	NA	NA	NA	1	NA	0	0	1	0	NA	NA	3	NA	1.2025	0.225323	0.438849	1.4141	1.56839
NM_001033148	1700029J07Rik	chr8	0	0	0	0.333333	0.588235	NA	0	1	0.629059	NA	0.25	1	3	0	1	3	17	NA	3	3.16202	0.453529	1.61374	0.646886	0.7555
NM_027103	1700030J22Rik	chr8	0	0	0	0.307692	0.666667	0.5	NA	0.266846	1	1	NA	3	1	1	0	13	3	4	NA	4.87333	1.1027	1.16356	1.04403	1.15117
NM_025969	1700034H14Rik	chr18	4	0	0	0.486301	0.6875	0.568627	0.567901	0.682139	0.000305597	0.19779	0.0986609	5	5	5	5	293	98	103	163	11.2315	45.3597	21.2753	25.0032	41.3398
NM_028484	1700037C18Rik	chr16	0	0	0	0.5	0.857143	NA	1	1	0.125	NA	0.125	1	1	0	1	6	7	NA	4	3.04782	1.44173	2.12527	2.10046	3.36383
NM_026091	1700037H04Rik	chr2	4	0	0	0.508197	0.561873	0.503817	0.566154	0.77158	0.0371714	1	0.0196796	4	4	4	4	433	307	136	328	40.436	51.8423	59.5342	31.4216	58.0922
NR_015458	1700047M11Rik	chr1	0	0	0	NA	NA	0.714286	NA	NA	NA	0.453125	NA	0	0	2	0	NA	NA	7	NA	4.91623	0.164679	NA	5.29673	NA
NR_033553	1700048O20Rik	chr9	0	0	0	NA	NA	NA	0	NA	NA	NA	0.0625	0	0	0	1	NA	NA	NA	5	13.8281	NA	0.304852	0.384066	1.65769
NM_028538	1700049G17Rik	chr7	0	0	0	0.466667	0.529412	0.533333	0.285714	1	1	1	0.179565	2	4	3	3	15	17	15	14	2.09118	1.10604	1.27807	1.80408	2.11135
NR_027956	1700052K11Rik	chr11	1	0	1	0.153846	0.5	0	0.590909	4.03932e-07	1	0.25	0.523467	6	4	1	5	52	16	3	22	3.44594	3.46447	2.59872	1.65274	2.98394
NM_024261	1700052N19Rik	chr10	4	0	0	0.546742	0.540541	0.545872	0.550562	0.0143751	0.303327	0.198037	0.111399	23	18	22	23	713	190	221	268	13.3307	21.6073	9.58406	11.5713	15.1708
NM_028536	1700054N08Rik	chr8	1	0	0	0.53719	0.653846	0.358209	0.40625	0.467207	0.168638	0.02712	0.377086	16	6	13	8	124	26	67	32	25.1036	3.46559	1.68427	2.81818	1.54887
NM_028546	1700066M21Rik	chr1	4	0	1	0.222222	0.361257	0.517766	0.324468	5.67761e-22	0.000153841	0.669137	8.7454e-12	11	12	13	13	289	194	197	378	11.9197	19.6428	21.5364	18.9928	42.5605
NM_001081045	1700081L11Rik	chr11	4	0	0	0.308219	0.574074	0.574324	0.49375	4.81795e-11	0.0346773	0.0839666	0.93702	6	6	6	6	297	219	148	162	31.2159	39.7957	38.9859	32.892	33.6327
NR_030735	1700086L19Rik	chr12	0	0	0	NA	0.333333	1	NA	NA	1	0.25	NA	0	1	1	0	NA	3	3	NA	8.13918	0.0690525	0.589686	0.75839	NA
NM_138581	1700088E04Rik	chr15	1	1	0	0	0.933333	1	0.25	0.0625	0.000976562	0.25	0.625	1	1	1	1	5	16	3	4	2.1811	3.42606	8.46926	5.02175	5.96189
NM_028567	1700094D03Rik	chr3	0	0	0	0.275862	0.44	0.526316	0.647059	0.0241195	0.690038	1	0.332306	3	2	2	1	30	25	19	17	6.04761	2.1346	2.38896	2.26138	2.06402
NM_028576	1700106N22Rik	chr17	4	0	0	0.5	0.527778	0.333333	0.40625	1	0.867939	0.237885	0.377086	4	4	3	4	44	36	18	32	6.66733	5.33839	4.97224	4.98853	6.00437
NM_021437	1700123O20Rik	chr14	4	0	0	0.525424	0.52381	0.433333	0.581818	0.794844	1	0.584665	0.28061	1	1	1	1	59	21	31	55	10.6814	23.5628	19.6197	21.3935	30.0169
NM_026919	1810006K21Rik	chr19	3	0	0	0.643836	0.442857	0.480769	NA	0.0186178	0.204732	0.889884	NA	1	2	3	0	75	140	53	NA	32.6208	58.5119	119.437	65.3014	40.2645
NM_133998	1810008A18Rik	chr10	4	0	0	0.593674	0.543103	0.55	0.623116	0.000170696	0.212156	0.204992	0.000630771	19	19	18	19	415	236	181	200	12.8777	21.2022	15.3036	16.0669	15.6495
NM_025463	1810009A15Rik	chr19	4	0	0	0.393939	0.428571	0.384615	0.647059	0.108857	0.349682	0.199591	0.121449	1	1	1	1	67	56	39	34	28.7899	134.37	81.701	67.152	83.2711
NM_001163473	1810010H24Rik	chr11	0	0	0	0.8	0.666667	NA	NA	0.375	1	NA	NA	1	1	0	0	5	3	NA	NA	3.55138	2.26558	6.00938	2.66597	3.60997
NM_001076681	1810012P15Rik	chr11	2	0	1	0.491892	0.461538	0.752137	0.640449	0.88315	0.677809	4.27994e-08	0.0105469	23	6	21	13	187	53	119	90	13.4177	3.72244	1.71829	3.36744	2.61833
NM_001145433	1810013D10Rik	chr5	2	1	0	0	0	1	0.45	0.000244141	0.00390625	0.000488281	0.823803	2	1	2	4	13	9	12	20	23.0331	2.25228	5.3146	7.99749	5.09986
NM_001081400	1810013L24Rik	chr16	4	0	0	0.556962	0.317073	0.565217	0.4375	0.368188	0.0275332	0.461391	0.381733	4	3	4	4	79	42	46	65	20.7669	9.84396	11.1296	13.5524	13.2552
NR_015572	1810014B01Rik	chr10	1	0	0	NA	NA	0.5	NA	NA	NA	1	NA	0	0	3	0	NA	NA	16	NA	3.28424	0.348672	3.52343	3.7747	0.777804
NM_026928	1810014F10Rik	chr7	4	1	0	0.0629371	0.488889	0.647727	0.312	1.02363e-29	0.863415	0.00734341	2.66103e-09	6	6	5	6	145	137	91	250	30.8627	20.4215	28.6944	20.1788	53.8633
NM_001099674	1810022K09Rik	chr3	4	0	1	0.662768	0.77512	0.641026	0.585106	1.42109e-13	2.66683e-45	1.90503e-05	0.0235087	3	3	3	3	516	632	238	188	74.1703	113.392	119.087	81.1091	89.5541
NM_178619	1810026J23Rik	chr9	4	0	0	0.589085	0.65309	0.656613	0.604962	9.95996e-06	2.47292e-16	7.65852e-11	1.76729e-06	19	19	18	19	633	724	434	531	27.3275	20.6232	30.7831	22.0221	26.6834
NM_025465	1810029B16Rik	chr8	4	0	0	0.551724	0.574468	0.472973	0.586667	0.160235	0.179665	0.727547	0.165428	7	7	7	6	205	96	76	77	9.45961	18.0669	12.266	10.7521	10.4231
NM_025471	1810030N24Rik	chr4	4	0	0	0.512	0.651515	0.5	0.375	0.858119	0.000631289	1	0.00448125	8	7	8	8	125	135	92	136	15.9325	17.6706	20.2069	15.2008	31.7486
NM_175141	1810030O07Rik	chrX	4	3	1	0	0.282828	0.992857	0	1.2326e-32	1.82576e-05	2.02325e-40	9.09495e-13	6	6	6	6	107	100	141	41	18.7758	15.9001	22.6615	25.8427	14.4873
NM_026977	1810031K17Rik	chr1	4	0	0	0.306306	0.478261	0.587719	0.420455	5.49482e-05	0.552979	0.0746925	0.165441	8	8	8	7	113	232	117	89	9.81154	12.0685	28.3639	18.8058	17.7836
NM_024461	1810037I17Rik	chr3	4	0	0	0.402757	0.460145	0.462585	0.417886	7.58975e-07	0.0671227	0.127461	5.32674e-05	3	3	3	4	661	561	449	618	81.3226	125.239	119.52	105.603	208.87
NM_001163145	1810041L15Rik	chr15	1	0	1	0.777778	1	0.749366	1	0.179688	0.25	1.13329e-135	0.125	3	1	45	1	9	3	2405	4	20.4277	0.496571	0.883448	71.513	0.760803
NM_026431	1810043G02Rik	chr10	4	0	0	0.413333	0.307692	0.36019	0.361842	0.0111339	8.13861e-08	5.89143e-05	0.000824682	15	16	15	16	228	197	213	153	23.7251	15.187	15.0264	19.0206	12.4709
NM_001110242	1810043H04Rik	chr11	4	0	1	0.45614	0.513514	0.666667	0.714286	0.596642	1	0.189247	0.0079159	2	2	2	2	59	38	23	42	12.5946	32.4731	21.319	17.4017	21.8631
NM_026327	1810048J11Rik	chr12	4	0	0	0.62465	0.431818	0.665254	0.541284	2.86233e-06	0.138668	4.26563e-07	0.249516	28	21	28	25	359	134	240	220	18.2927	11.1692	6.82074	9.00269	12.8285
NM_025560	1810049H13Rik	chr11	4	0	0	0.344828	0.65	0.454545	0.477778	0.000232466	0.0806905	0.831812	0.752033	6	6	3	5	145	40	23	90	11.5218	16.4573	6.84836	5.03293	14.1116
NM_028077	1810055G02Rik	chr19	4	0	0	0.447514	0.5125	0.513514	0.525926	0.0161743	0.501766	0.661163	0.428908	11	11	11	11	550	815	339	271	14.6295	37.3065	63.4351	41.2979	28.7417
NR_033571	1810062O18Rik	chr14	0	0	0	NA	1	NA	NA	NA	0.25	NA	NA	0	1	0	0	NA	3	NA	NA	2.01308	1.05298	2.24803	1.6521	0.958754
NM_174987	1810063B05Rik	chr8	4	0	0	0.570093	0.461538	0.666667	0.394737	0.17564	0.845019	0.189247	0.255875	2	2	2	2	107	26	22	38	14.1171	29.6509	7.49076	10.8162	17.9534
NM_026209	1810063B07Rik	chr14	2	1	0	NA	0.595745	0.6	1	NA	0.24296	1	3.63798e-12	0	3	1	3	NA	48	5	39	4.0145	0.466007	3.49083	1.8856	3.36095
NM_026194	1810074P20Rik	chr4	4	0	0	0.527027	0.617391	0.580952	0.55102	0.565172	0.0149647	0.118	0.363354	10	8	8	7	150	121	110	99	7.8755	7.3897	9.27478	8.89505	8.38976
NR_015508	2010000I03Rik	chrX	0	0	0	0.666667	0.454545	NA	1	1	1	NA	0.0625	1	2	0	1	3	11	NA	5	3.01185	0.791147	2.48575	1.7097	0.83248
NM_001163503	2010001E11Rik	chr10	0	0	0	NA	NA	0.0909091	0	NA	NA	0.0117188	0.25	0	0	2	1	NA	NA	11	3	0.4835	0.0741596	0.10555	0.504203	0.393886
NR_026688	2010001M06Rik	chr5	0	0	0	0.333333	NA	NA	NA	1	NA	NA	NA	1	0	0	0	3	NA	NA	NA	2.79666	0.679177	0.16111	0.355204	0.360734
NM_134133	2010002N04Rik	chr18	3	0	1	0.456954	0.324324	0.74359	0.805556	0.328809	0.047031	1.28271e-07	0.000312551	9	6	9	6	152	37	117	37	2.89858	10.0114	3.44082	9.05868	2.9004
NM_027242	2010007H12Rik	chr5	2	0	0	0.484848	0.333333	0.666667	0.4	1	0.6875	0.237885	1	1	1	1	1	33	6	18	5	3.87029	25.2648	11.0445	5.85159	7.76384
NM_025912	2010011I20Rik	chr2	2	0	2	1	0.73913	0.816901	0.333333	5.96046e-08	0.0346897	6.26943e-08	1	4	7	9	1	25	24	71	3	9.98422	1.75487	4.72774	7.17837	1.37314
NM_025563	2010012O05Rik	chr19	4	0	0	0.603774	0.634146	0.657143	0.459459	0.168978	0.117275	0.0895311	0.742829	2	3	3	2	55	41	36	37	9.49969	5.8925	6.94579	7.65679	6.28698
NM_001166029	2010015L04Rik	chr4	4	4	0	0.0463415	0.039823	0.0317003	0.127962	1.87986e-91	6.9762e-53	1.35181e-84	6.54007e-30	2	2	2	2	412	231	353	212	39.099	12.1967	11.7819	18.736	9.79097
NM_023220	2010106G01Rik	chr2	4	0	0	0.518946	0.563397	0.516756	0.52208	0.196501	0.000276971	0.204582	0.103498	37	36	39	39	1215	845	1503	1410	18.9328	22.5738	24.699	43.782	42.0068
NM_027251	2010107G23Rik	chr10	2	0	1	0.296296	0.515152	0.742574	0.441176	0.052239	1	1.1155e-06	0.607591	7	6	9	7	27	33	103	34	17.5684	1.20736	2.36862	5.83654	3.48365
NR_024069	2010107H07Rik	chr14	4	0	1	0.464286	0.477612	0.393939	0.287879	0.44699	0.807195	0.0438753	0.000756107	2	2	2	2	142	67	99	67	13.3073	40.8883	29.3977	42.3276	28.2099
NM_001162903	2010109K11Rik	chr12	3	0	0	0.44	0.75	0.375	0.4	0.479888	0.0768127	0.307456	0.232693	4	3	3	4	50	16	25	45	7.67268	7.16772	2.3036	5.39892	6.3065
NM_028079	2010111I01Rik	chr13	1	0	0	0.607143	0.384615	0.642105	0.2	0.344928	0.581055	0.00731312	0.375	6	3	9	1	28	13	97	5	6.32179	1.44874	1.30591	4.34403	0.64123
NM_028096	2010300C02Rik	chr1	0	0	0	NA	NA	NA	1	NA	NA	NA	0.125	0	0	0	1	NA	NA	NA	4	36.5537	0.220189	0.31339	0.22354	0.330211
NM_027250	2010305A19Rik	chr4	4	0	0	0.656	0.543478	0.610169	0.563218	0.000618058	0.465707	0.117477	0.283607	13	14	11	12	126	94	60	87	5.46899	7.8364	7.32377	6.56355	9.51353
NR_029440	2010320M18Rik	chr8	4	1	1	0.422222	0.833333	0.904762	0.4	0.371298	0.000324914	0.000221252	0.503445	4	4	4	4	46	30	22	20	6.00984	16.301	12.8414	13.918	14.3763
NM_025617	2210012G02Rik	chr4	4	0	0	0.539823	0.614035	0.449275	0.608108	0.451853	0.111161	0.470369	0.0805069	7	7	11	7	114	57	72	74	4.08418	5.00339	3.25799	4.20191	4.74307
NR_028432	2210013O21Rik	chrX	4	4	0	0	0	0.992958	0	1.57772e-30	1.77636e-15	5.12987e-41	1.35525e-20	2	2	2	2	102	50	143	67	45.6676	32.3054	28.3024	59.8078	38.9487
NR_015577	2210015D19Rik	chr11	4	0	0	0.471154	0.65233	0.582915	0.522843	0.259435	4.04798e-07	0.0230629	0.568805	12	12	11	12	418	281	202	198	14.0786	18.3269	16.6905	11.9449	14.2831
NM_027335	2210016F16Rik	chr13	0	0	0	NA	0	NA	NA	NA	0.125	NA	NA	0	1	0	0	NA	4	NA	NA	6.49056	0.220175	2.96278	0.188427	0.318933
NM_028211	2210016L21Rik	chr5	4	0	0	0.435897	0.560284	0.525	0.404762	0.0394163	0.17763	0.580129	0.0400358	6	6	6	6	274	147	167	127	99.4229	29.8257	24.7272	32.1595	20.387
NM_172280	2210018M11Rik	chr7	4	0	2	0.537849	0.606796	0.700855	0.836879	0.255849	0.00264909	1.65041e-05	1.38997e-16	6	6	6	6	254	210	117	141	19.1144	20.9672	21.4504	17.5304	13.4085
NR_030711	2210403K04Rik	chr11	2	0	0	0.5	0.310345	0.666667	0.69697	1	0.0614283	1	0.035082	3	3	1	3	18	29	3	33	10.7832	1.53526	3.86946	2.60952	5.45318
NM_001034891	2210404J11Rik	chr17	2	1	1	NA	0.25	0.0769231	0.285714	NA	0.625	0.00341797	0.179565	0	1	1	1	NA	4	14	16	0.625634	0.500499	0.661468	3.98244	3.01909
NM_001099917	2210404O07Rik	chr10	0	0	0	0.333333	NA	NA	NA	1	NA	NA	NA	1	0	0	0	3	NA	NA	NA	0.91013	0.884112	0.139815	NA	NA
NM_001145676	2210408I21Rik	chr13	0	0	0	NA	NA	NA	0.333333	NA	NA	NA	1	0	0	0	1	NA	NA	NA	3	3.17166	1.70025	1.73781	1.64714	1.6546
NM_027090	2300009A05Rik	chr9	0	0	0	0.666667	NA	NA	0	0.6875	NA	NA	0.25	1	0	0	1	6	NA	NA	3	10.6474	10.3902	8.06627	11.115	14.5992
NM_027977	2310001A20Rik	chr2	4	0	0	0.577855	0.398649	0.568306	0.413146	0.00952749	0.0168414	0.075754	0.0134497	5	5	5	5	292	148	185	215	42.8271	39.9779	35.6816	35.7731	46.9742
NM_145563	2310001H12Rik	chr5	3	0	0	0.5	0.481481	0.486486	0.285714	1	1	0.907561	0.453125	3	3	3	2	36	27	75	7	31.3434	8.87426	12.9018	20.4154	6.85324
NM_027981	2310002L09Rik	chr4	0	0	0	0	NA	NA	0	1.90735e-06	NA	NA	0.000488281	2	0	0	2	20	NA	NA	12	0.0451921	0.292668	0.0833096	NA	0.279802
NM_029607	2310003C23Rik	chr2	4	0	0	0.51046	0.536082	0.580882	0.494444	0.795902	0.35067	0.0713533	0.940612	2	2	2	2	241	195	136	183	35.4069	34.0131	39.9362	34.108	40.477
NM_027980	2310003H01Rik	chr11	4	0	0	0.410072	0.587156	0.6	0.6	0.0413978	0.0842216	0.232693	0.177001	6	5	5	5	140	114	45	58	4.82576	13.4141	15.8509	8.48551	9.24125
NM_027093	2310003L22Rik	chr2	4	0	0	0.392157	0.465116	0.423077	0.45977	0.0370668	0.760792	0.557197	0.520292	3	3	3	3	105	43	26	87	14.6539	10.379	6.85643	6.58512	16.1755
NM_025510	2310004I24Rik	chr11	4	0	0	0.36413	0.5375	0.596491	0.481481	0.000280622	0.576431	0.18485	0.824313	5	5	5	5	188	81	59	83	14.4394	17.8314	9.86063	8.90985	12.1251
NM_027107	2310004N24Rik	chr11	4	0	3	0.586397	0.792763	0.836634	0.735294	6.42751e-05	1.09118e-25	3.32837e-23	4.15242e-15	12	12	12	12	548	312	203	278	11.6811	37.176	26.8574	23.0165	33.2642
NM_146068	2310008H04Rik	chr16	4	0	0	0.47482	0.528302	0.465517	0.375	0.610974	0.783846	0.694004	0.0599412	4	4	4	4	139	53	59	64	1.00746	28.5629	10.5515	13.3981	22.2455
NM_023197	2310008H09Rik	chr7	3	0	0	0.486111	0.6	0.592593	0.666667	0.906294	0.310505	0.442068	0.189247	2	2	1	1	73	35	27	22	1.701	6.68293	4.41987	2.60076	4.39651
NM_001081226	2310009B15Rik	chr1	2	0	0	0.428571	NA	0.571429	0.6	0.790527	NA	1	0.753906	2	0	2	2	14	NA	8	10	6.11004	32.6445	11.8268	12.2614	18.5996
NM_025521	2310011J03Rik	chr10	4	0	0	0.566265	0.553073	0.57513	0.517647	0.0181446	0.178339	0.0435741	0.616473	7	7	6	7	338	182	195	259	16.2455	32.9921	23.9388	29.3808	37.7589
NM_029809	2310014L17Rik	chr7	0	0	0	0.0952381	0.132075	0.0714286	0.111111	5.65315e-08	3.06024e-15	5.63159e-09	1.94157e-06	4	5	3	3	42	107	42	36	13.15	0.52317	1.61334	1.25862	0.833619
NR_033514	2310015A10Rik	chr12	1	0	0	0.315789	0.413793	0.2	0.2	0.0335524	0.237047	0.0351562	0.00407732	9	10	4	7	38	59	15	25	5.68505	2.14603	3.735	2.5253	2.21151
NM_023516	2310016C08Rik	chr6	4	0	1	0.603053	0.317757	0.756098	0.5	0.0227433	0.000206375	0.00145049	1	4	4	4	4	131	108	42	62	4.92878	17.9394	19.0633	10.4598	18.0585
NM_183256	2310016M24Rik	chr15	4	0	0	0.480519	0.392857	0.35	0.6	0.819893	0.140895	0.263176	0.136032	2	2	2	2	77	58	20	65	75.3581	88.5946	94.8491	65.4562	134.071
NM_027996	2310021P13Rik	chr14	4	0	0	0.57377	0.611399	0.565359	0.467153	0.024849	1.40402e-05	0.0256212	0.494442	9	9	9	9	248	390	310	138	26.1241	19.4423	39.429	31.9494	15.964
NM_001122767	2310022A10Rik	chr7	0	0	0	0.6	NA	0.6	0.75	1	NA	1	0.625	1	0	1	1	5	NA	5	4	0.310118	0.210877	NA	0.236329	0.192006
NM_175107	2310022A10Rik	chr7	4	0	0	0.561538	0.475248	0.546667	0.517647	0.188107	0.690826	0.488683	0.828423	5	5	5	5	130	102	75	85	1.81848	4.83912	4.32749	4.50172	4.87886
NM_175149	2310022B05Rik	chr8	4	0	0	0.350877	0.556962	0.400709	0.324742	5.40267e-07	0.0148307	0.00102074	1.18478e-06	18	18	17	17	288	476	286	195	45.0263	13.8735	29.6431	19.8638	15.2455
NM_001085493	2310030N02Rik	chr4	4	0	0	0.578125	0.434783	0.333333	0.434783	0.260435	0.677639	0.301758	0.677639	3	2	2	2	64	23	15	24	9.75407	18.1652	9.83502	7.55639	11.4276
NM_027129	2310035K24Rik	chr2	4	0	0	0.564444	0.620915	0.536842	0.629482	0.0617076	0.00347225	0.538394	4.89283e-05	16	16	11	16	227	153	96	256	7.18719	8.71729	9.54396	7.6122	15.4614
NM_133714	2310037I24Rik	chr15	4	0	0	0.504751	0.508772	0.492537	0.471831	0.80939	0.812755	0.827046	0.265105	7	7	7	7	849	288	343	433	32.7388	85.2092	48.3506	63.1284	77.377
NM_025966	2310039H08Rik	chr17	4	0	0	0.637288	0.618644	0.456376	0.666667	2.78921e-06	0.0126026	0.32558	0.000160235	5	5	5	4	298	118	150	132	5.15276	37.413	16.5364	26.7131	20.0265
NM_172417	2310042D19Rik	chr4	0	0	0	0.4	NA	NA	NA	1	NA	NA	NA	1	0	0	0	5	NA	NA	NA	0.915644	0.485165	0.79515	0.692009	0.234261
NM_173735	2310044G17Rik	chr12	0	0	0	0.785714	0.681818	0	0.75	0.00371917	0.133801	0.0625	0.625	2	2	1	1	28	22	5	4	0.638512	0.758094	0.902419	0.410894	0.373365
NR_033623	2310044G17Rik	chr12	0	0	0	NA	1	NA	NA	NA	0.25	NA	NA	0	1	0	0	NA	3	NA	NA	0.362565	0.0797434	0.264827	0.145968	0.105886
NM_197991	2310044H10Rik	chr7	4	0	0	0.566855	0.540731	0.558615	0.579645	2.97883e-18	9.28537e-06	2.88645e-08	4.25367e-20	15	15	15	15	4294	3009	2285	3349	77.7648	228.773	148.169	120.554	211.463
NM_027150	2310046A06Rik	chr9	0	0	0	NA	NA	1	0.583333	NA	NA	0.00390625	0.774414	0	0	2	3	NA	NA	11	12	16.916	0.785797	0.328944	1.74056	2.35687
NM_025870	2310047B19Rik	chr9	3	0	2	0.607143	0.727273	0.727273	0.416667	0.344928	0.013531	0.013531	0.774414	4	4	5	3	28	35	33	12	3.35465	3.33524	3.83242	3.93668	2.58405
NM_028005	2310047M10Rik	chr11	4	1	0	0.15	0.421053	0.357143	0.428571	8.36458e-06	0.647606	0.42395	0.663624	3	2	2	3	40	19	14	21	11.5843	8.40064	5.08596	6.19675	8.09128
NM_026655	2310057M21Rik	chr7	4	1	0	0.407407	0.5	0.555556	0.875	0.442068	1	0.814529	0.00418091	1	2	1	1	27	22	18	16	10.8074	8.9039	5.73723	6.92495	6.13842
NM_001033630	2310061I04Rik	chr17	4	0	0	0.614754	0.59375	0.34375	0.568966	0.0141705	0.0416383	0.110184	0.358143	4	4	4	4	124	131	33	60	22.9306	15.8978	20.4226	12.8647	13.5005
NR_027965	2310061J03Rik	chr16	0	0	0	NA	0.25	0.25	NA	NA	0.625	0.625	NA	0	1	1	0	NA	4	4	NA	2.65286	1.04757	1.07351	1.31489	0.801214
NM_028014	2310067B10Rik	chr11	4	0	1	0.286853	0.507987	0.520833	0.526786	1.08485e-11	0.821173	0.67707	0.6368	19	19	18	16	255	316	146	112	16.0498	11.7922	21.9651	12.1866	8.37698
NM_030208	2310079F23Rik	chr5	1	0	0	0.5	0.615385	0.846154	0.514286	1	0.32694	0.000533521	1	11	5	6	8	99	26	27	35	2.18974	4.83645	2.16706	2.78704	2.59258
NM_025636	2310079N02Rik	chr8	4	0	0	0.445415	0.316456	0.487603	0.337931	0.112549	0.00146607	0.855822	0.0001176	8	8	8	8	230	83	123	146	13.6046	17.1804	9.54415	14.361	18.4842
NM_025605	2400001E08Rik	chr7	4	0	0	0.522908	0.522099	0.536105	0.537594	0.155518	0.24926	0.134332	0.0366797	4	4	4	4	1010	730	462	804	68.9761	124.658	164.93	117.141	179.474
NM_025542	2410001C21Rik	chr2	4	0	0	0.508264	0.588415	0.621875	0.639241	0.750384	0.00160775	1.52877e-05	8.45331e-07	10	10	10	10	486	332	321	319	34.8693	36.2326	38.0951	39.926	37.6483
NM_025880	2410002F23Rik	chr7	4	0	0	0.556777	0.647929	0.590164	0.683761	0.0692234	5.85202e-08	0.0177636	8.71744e-05	5	5	5	5	275	342	187	118	38.8039	49.8698	70.3699	45.9446	32.0758
NM_183137	2410002I01Rik	chr11	1	0	1	0.285714	0.333333	0.25	0.5	0.0783539	0.507812	0.625	1	2	1	1	1	23	9	4	4	4.80201	8.78067	6.59582	4.65599	5.01996
NM_001093759	2410002O22Rik	chr13	0	0	0	0.666667	0.8	0.4375	0.625	0.189247	0.0351562	0.803619	0.454498	1	1	1	1	22	15	16	16	0.311561	0.493805	0.498777	0.599819	0.48225
NM_001093760	2410002O22Rik	chr13	0	0	0	0.333333	0.25	0.526316	0.375	0.237885	0.289062	1	0.454498	1	1	1	1	18	8	19	16	0.551665	0.447912	0.273216	0.702762	0.509788
NR_003546	2410002O22Rik	chr13	0	0	0	0.875	0	0.4	1	0.0703125	0.00195312	1	0.03125	1	3	1	1	8	10	5	6	1.34978	1.03515	1.52242	1.13689	0.714746
NM_025555	2410004B18Rik	chr3	3	0	1	0.482143	NA	0.482759	0.833333	0.893853	NA	1	0.0385742	3	0	3	3	58	NA	29	12	15.8339	24.2161	14.677	15.1796	13.9389
NR_030738	2410006H16Rik	chr11	4	0	0	0.393725	0.550551	0.644309	0.537869	3.20561e-14	0.0015442	1.54855e-10	0.0376353	6	6	6	6	1289	1019	500	785	56.9489	247.014	251.47	125.726	211.439
NM_023633	2410016O06Rik	chr12	4	0	1	0.44586	0.507042	0.702128	0.522388	0.201474	1	0.00794273	0.807195	7	6	7	7	158	71	48	67	5.55199	12.9294	9.73224	8.04636	7.94144
NM_026643	2410017P07Rik	chr10	0	0	0	0.571429	NA	1	1	1	NA	0.25	0.25	1	0	1	1	7	NA	3	3	0.137594	0.721767	NA	0.335536	0.212974
NR_015504	2410018L13Rik	chr12	0	0	0	0.0909091	0	NA	0	0.0117188	0.0625	NA	0.25	2	1	0	1	11	5	NA	3	8.12077	2.81019	1.94271	2.14157	2.17491
NM_025556	2410022L05Rik	chr8	4	0	0	0.557214	0.675926	0.589286	0.618182	0.120503	0.000325839	0.228806	0.016745	4	4	4	4	204	108	57	110	27.551	39.4408	31.7766	21.1061	31.6469
NM_024254	2410042D21Rik	chr2	4	0	0	0.470852	0.514851	0.471264	0.443709	0.421702	0.842382	0.668285	0.192726	9	8	9	8	226	101	88	152	7.95666	11.9318	9.14643	10.052	12.9869
NM_026629	2410066E13Rik	chr6	2	0	0	0.575758	0.507937	0.621622	0.666667	0.48685	1	0.187742	0.6875	6	7	7	2	33	63	38	6	43.5254	2.74167	7.7573	5.44178	2.10533
NM_001162906	2410089E03Rik	chr15	4	0	0	0.646766	0.534562	0.658199	0.598174	4.18551e-09	0.163833	4.39288e-11	0.00442978	56	51	56	37	407	437	443	222	11.4372	3.90128	6.08253	7.31473	3.75729
NM_026120	2410127L17Rik	chr19	4	0	1	0.64751	0.662577	0.561728	0.769841	2.16867e-06	4.01399e-05	0.135248	2.56456e-18	7	7	6	6	261	163	162	253	6.99766	17.075	13.2454	20.3571	21.7916
NM_001081236	2410131K14Rik	chr5	4	0	0	0.685897	0.671717	0.645161	0.505618	4.50747e-11	1.53349e-06	1.42245e-06	0.873698	28	28	26	29	315	202	285	356	9.60409	7.12937	8.7018	11.6173	13.0454
NM_023215	2500003M10Rik	chr3	4	0	0	0.529412	0.580851	0.5	0.543284	0.176629	0.00052771	1	0.125939	8	8	8	8	565	474	447	339	56.3564	71.6369	73.2879	94.3823	77.391
NM_001033164	2510002D24Rik	chr16	2	1	0	NA	0.607143	0.0714286	NA	NA	0.0629723	0.00183105	NA	0	6	2	0	NA	85	14	NA	9.25069	0.0458481	7.96107	3.9564	NA
NM_028197	2510003E04Rik	chr10	4	0	0	0.513725	0.507109	0.615385	0.473029	0.707193	0.890531	1.25057e-05	0.439594	8	7	7	8	256	212	369	243	83.7983	29.0879	38.831	58.2935	42.5257
NM_001001881	2510009E07Rik	chr16	4	0	0	0.498195	0.552632	0.448669	0.506849	1	0.0216613	0.108708	0.860677	11	14	10	14	277	499	263	294	24.9001	15.1991	56.5498	28.2935	29.1176
NM_027381	2510012J08Rik	chr10	3	0	0	0.535714	0.434783	0.416667	0.166667	0.850554	0.677639	0.541256	0.21875	3	3	3	1	28	24	24	6	7.77003	6.63553	10.2411	8.84932	4.92307
NR_024619	2610001J05Rik	chr6	4	0	1	0.645238	0.723077	0.607595	0.695402	2.76285e-09	3.76742e-10	0.000155331	2.28408e-13	4	4	4	4	422	201	327	352	16.8024	38.2205	27.3776	42.2226	58.5045
NM_001081381	2610002I17Rik	chr9	4	0	0	0.544622	0.632231	0.693467	0.536458	0.0689745	4.66483e-05	4.91587e-08	0.348171	24	23	22	22	440	246	200	192	6.22603	15.5169	12.2305	11.5932	11.8609
NM_001033134	2610002J02Rik	chr4	4	0	3	0.630542	0.713178	0.76506	0.743316	0.000243888	5.50923e-12	4.47836e-12	1.85041e-11	15	15	15	15	206	260	169	190	8.45777	11.5252	17.3239	12.0552	18.0612
NM_025921	2610002M06Rik	chrX	4	4	0	0	0	0.987288	0.0217391	5.73972e-42	4.93038e-32	3.96803e-65	1.72827e-24	20	16	24	15	142	107	238	93	25.0753	3.73406	4.66749	8.16567	4.08474
NR_028428	2610005L07Rik	chr8	4	2	1	0.127711	0.304054	0.0981595	0.243655	1.14931e-57	8.89924e-17	3.42412e-54	3.08126e-13	27	27	20	23	425	454	344	198	57.48	17.1892	29.1976	23.0124	16.8826
NM_001004362	2610008E11Rik	chr10	4	0	1	0.622754	0.615385	0.725389	0.588235	0.00187833	0.00723667	3.01227e-10	0.0662913	24	22	23	17	167	145	196	119	5.53423	4.08711	4.29629	7.75376	4.89494
NR_027826	2610017I09Rik	chr1	4	0	0	0.487013	0.656794	0.670588	0.609375	0.690062	4.95982e-14	1.02332e-05	0.00298728	5	5	5	5	311	578	173	195	56.7602	72.0312	116.239	54.4749	68.039
NM_019836	2610024G14Rik	chr5	4	0	0	0.603333	0.46875	0.512563	0.541353	0.000410621	0.28816	0.776838	0.385959	15	13	15	13	306	324	199	135	10.0785	12.8576	15.9251	12.0885	8.52331
NM_026403	2610027L16Rik	chr14	4	0	0	0.55	0.616883	0.495238	0.469697	0.0939037	0.0046375	1	0.542507	7	7	6	5	302	155	107	133	3.69876	20.5842	9.24067	11.1589	15.6118
NM_028228	2610028A01Rik	chr14	4	0	0	0.458824	0.333333	0.478261	0.607143	0.515426	0.0987371	1	0.344928	2	2	2	2	85	30	23	28	6.45602	30.8974	17.1975	17.6459	18.8533
NM_026312	2610029G23Rik	chrX	2	0	1	0.526316	NA	0.857143	0.181818	1	NA	0.125	0.0654297	4	0	1	3	19	NA	7	12	12.3221	30.0002	18.1416	21.589	18.6948
NM_029840	2610029I01Rik	chr4	4	0	0	0.588235	0.503448	0.698529	0.488889	0.000320693	1	4.17041e-06	0.82314	17	17	15	14	430	146	136	181	18.0564	16.9526	7.75552	10.2816	12.9386
NM_001081356	2610030H06Rik	chrX	4	4	0	0	0.00613497	0.991701	0	7.17465e-43	2.80533e-47	1.65051e-68	1.26218e-29	12	16	17	12	143	163	243	98	20.534	8.82323	12.3268	21.4658	11.7086
NM_027420	2610034B18Rik	chr7	4	0	0	0.654033	0.693227	0.677419	0.679348	3.07235e-23	2.66845e-18	6.69665e-12	1.11052e-22	19	18	18	16	1043	513	379	745	6.64273	31.7081	24.6261	21.4254	37.0892
NR_015556	2610035D17Rik	chr11	3	0	0	0.338028	0.446809	0.677419	0.733333	0.00855454	0.560065	3.95327e-10	0.118469	9	9	10	3	71	47	316	15	4.86133	4.30973	3.34974	24.5536	1.31498
NM_029282	2610036D13Rik	chr2	4	0	0	0.530516	0.559211	0.4375	0.541667	0.411009	0.167722	0.314307	0.475152	10	10	10	10	217	153	82	96	11.8776	18.3741	16.9441	12.6168	17.7525
NM_025642	2610039C10Rik	chr16	4	0	0	0.423963	0.393443	0.541667	0.640625	0.00177578	0.123731	0.665466	0.00186247	3	3	3	3	436	61	48	131	2.86263	40.9733	10.4512	10.0213	21.4623
NM_153780	2610044O15Rik	chr17	2	0	0	0.52381	NA	0.692308	0.5	1	NA	0.266846	1	2	0	2	1	21	NA	14	4	17.6483	5.79233	3.48576	9.27099	4.70766
NM_027426	2610109H07Rik	chr4	1	0	1	NA	0.704082	NA	0.333333	NA	6.57224e-05	NA	1	0	1	0	1	NA	99	NA	3	0.324345	0.434583	39.5706	1.89213	2.70061
NR_015483	2610203C20Rik	chr9	0	0	0	0.833333	1	1	NA	0.21875	0.125	0.25	NA	1	1	1	0	6	4	3	NA	20.1079	6.33209	22.0475	7.08162	5.8303
NR_027972	2610204G22Rik	chr4	0	0	0	0.5	0.666667	1	0.666667	1	0.507812	0.25	1	1	1	1	1	6	9	3	3	0.385364	0.998261	1.5392	0.783122	0.795314
NM_026005	2610301B20Rik	chr4	4	0	0	0.53405	0.509615	0.508197	0.502703	0.281176	0.777177	0.847749	1	15	15	15	12	285	315	247	186	21.8807	13.5745	22.8124	19.9172	14.873
NM_146055	2610301G19Rik	chr14	4	0	0	0.516878	0.530726	0.512545	0.511111	0.490881	0.267023	0.719508	0.789797	9	9	9	9	481	364	284	226	30.5131	29.786	30.9742	26.1602	23.1826
NR_028298	2610306M01Rik	chr6	4	0	0	0.403846	0.537037	0.561404	0.611111	0.211609	0.683489	0.427043	0.242985	4	4	5	4	53	55	57	37	8.49151	8.84967	13.2175	12.1707	9.74888
NM_001002004	2610507B11Rik	chr11	4	0	0	0.362745	0.545777	0.573254	0.546702	4.11105e-44	0.000644525	5.75562e-07	0.000281749	16	16	16	16	2561	1426	1191	1550	85.2719	151.866	113.711	114.613	145.124
NM_181075	2610524H06Rik	chr5	3	2	1	0.896154	0.9	0.333333	0.72549	4.42768e-42	2.27508e-12	0.301758	0.0017692	6	4	4	5	262	71	15	52	16.4904	29.5873	13.6967	2.06319	12.2861
NM_025599	2610528E23Rik	chr16	4	0	0	0.472727	0.4	0.589744	0.372093	0.533545	0.268187	0.336784	0.126289	4	4	4	4	167	40	41	43	6.33114	22.7676	6.04155	6.96272	10.2224
NM_028299	2700029M09Rik	chr8	4	0	0	0.571006	0.489583	0.346667	0.557252	0.010468	0.918778	0.0105821	0.221116	4	4	4	4	340	98	77	132	36.3051	49.1734	23.8053	20.9937	35.0266
NR_033198	2700046G09Rik	chr19	1	0	0	0.5	0.409091	0.714286	0.357143	1	0.523467	0.453125	0.42395	3	2	1	2	12	22	7	14	3.75829	1.58433	3.5785	1.94539	2.79887
NM_001163378	2700049A03Rik	chr12	0	0	0	0.666667	NA	NA	1	0.6875	NA	NA	0.25	1	0	0	1	6	NA	NA	3	0.32803	0.294141	0.376781	0.153833	0.156228
NM_178115	2700050L05Rik	chr7	4	0	0	0.565789	0.578947	0.681818	0.357143	0.301872	0.417692	0.0226288	0.0884295	9	7	8	7	76	38	45	42	10.0979	7.66112	5.88872	7.03939	5.7664
NM_026528	2700060E02Rik	chr14	4	0	0	0.485658	0.53303	0.551688	0.549356	0.378539	0.0543357	0.0016166	0.0100611	6	6	6	6	1012	887	959	705	55.7404	93.3684	103.128	126.714	98.8841
NM_026529	2700062C07Rik	chr18	4	3	0	1	0.533333	1	1	9.53674e-07	1	1.19209e-07	0.00012207	3	2	3	3	21	16	24	14	20.2557	7.11535	8.80281	8.07228	6.27928
NM_028308	2700078K21Rik	chr7	4	0	0	0.510417	0.521739	0.688889	0.596774	0.918778	0.809949	0.0160944	0.161881	5	4	5	5	97	69	45	63	19.6087	20.406	17.945	17.7734	22.3153
NM_175381	2700081O15Rik	chr19	4	0	0	0.566396	0.640625	0.539326	0.507042	0.0123579	7.99639e-06	0.329875	0.933161	19	16	16	16	375	259	181	145	9.57657	14.8233	11.1533	11.4777	8.84152
NM_001163445	2700089E24Rik	chr6	4	0	0	0.487294	0.539652	0.547386	0.507018	0.536214	0.078443	0.0211417	0.769401	13	9	14	14	678	522	618	575	85.1325	30.2936	29.5782	44.3117	40.9072
NR_027831	2810002D19Rik	chr2	3	3	0	0.894737	0.863636	0.875	1	5.67619e-10	0.000855446	0.000277162	0.0078125	3	4	4	2	57	22	24	8	1.27688	5.26684	5.21473	5.20961	4.37853
NM_025615	2810004N23Rik	chr8	4	0	1	0.690058	0.606061	0.595238	0.717105	1.65296e-12	0.00792977	0.0400358	8.54129e-08	10	9	10	10	346	166	127	153	8.74315	38.639	19.7489	18.8806	22.0442
NM_001134717	2810006K23Rik	chr5	4	0	0	0.652439	0.515152	0.5	0.554054	0.00011636	0.902159	1	0.415985	4	4	4	4	164	68	43	74	12.4947	20.6103	13.4468	10.7614	15.4291
NR_027059	2810008D09Rik	chr11	4	0	1	0.510145	0.73913	0.518868	0.510917	0.534179	8.76866e-05	0.770919	0.791597	13	5	11	13	1045	69	108	231	27.035	76.8534	16.1056	15.387	28.6988
NM_001048250	2810008M24Rik	chr13	4	0	0	0.543554	0.381215	0.556962	0.557003	0.156457	0.00172057	0.0910311	0.0521439	11	7	10	11	291	181	240	309	35.5777	47.697	57.2763	55.1994	76.097
NM_025479	2810021B07Rik	chr13	4	0	0	0.605263	0.68	0.458333	0.518519	0.255875	0.107752	0.83882	1	4	2	2	4	38	25	24	28	13.6228	7.27201	7.04048	8.02651	5.1873
NM_001162922	2810021G02Rik	chr2	0	0	0	NA	0.833333	NA	NA	NA	0.21875	NA	NA	0	1	0	0	NA	6	NA	NA	16.0158	4.41338	6.91414	7.12374	3.94617
NR_027984	2810025M15Rik	chr1	4	0	1	0.420601	0.622754	0.635135	0.721805	0.000703974	8.46035e-06	0.00126875	3.19396e-07	7	7	7	7	470	336	152	134	8.86331	57.2891	30.2318	26.7206	21.7846
NM_028317	2810030E01Rik	chr2	0	0	0	NA	1	NA	NA	NA	0.25	NA	NA	0	1	0	0	NA	4	NA	NA	4.78451	0.828566	1.21613	0.0812499	0.268173
NM_173382	2810046L04Rik	chr3	2	0	0	0.666667	0.628205	0.62963	0.666667	0.237885	0.00170437	0.247789	0.507812	5	12	5	3	18	156	28	9	2.14637	1.7386	11.4051	3.44567	1.12478
NR_015598	2810047C21Rik1	chr7	3	1	2	0.722892	1	1	0.833333	5.9736e-05	1.52588e-05	0.5	0.00154388	3	3	1	3	92	17	3	24	1.06108	13.0561	4.93904	1.18596	5.96735
NM_026038	2810055F11Rik	chr12	4	0	2	0.20098	0.366667	0.322581	0.274194	2.04447e-18	0.0518939	0.0707555	0.000497092	7	6	5	6	208	60	31	62	4.89391	18.2872	7.9215	6.2894	11.6661
NM_028814	2810403A07Rik	chr3	4	0	0	0.531365	0.548913	0.56129	0.517375	0.156281	0.209996	0.147998	0.619207	6	6	6	6	547	184	157	263	37.4649	44.1777	25.2957	28.0626	41.1726
NR_015493	2810403D21Rik	chrX	0	0	0	NA	NA	NA	0	NA	NA	NA	0.125	0	0	0	1	NA	NA	NA	4	1.35966	0.505835	1.2799	0.529094	0.895552
NM_001040396	2810407C02Rik	chr3	4	0	0	0.468407	0.560403	0.579122	0.472661	0.0952857	0.000340225	4.25532e-08	0.125041	11	11	11	11	734	909	1228	833	84.4003	37.8955	50.5805	84.8994	72.3628
NM_001007581	2810408M09Rik	chr2	4	0	0	0.605809	0.69403	0.514286	0.655629	0.00123191	8.23337e-06	0.904975	0.000162429	12	11	8	11	245	135	72	151	7.93765	11.3393	7.87584	5.59826	9.97357
NM_198619	2810408P10Rik	chr4	4	0	2	0.512821	0.826087	0.258065	0.459016	1	0.00259948	0.0106738	0.608921	4	4	4	4	39	23	32	61	11.5555	4.90768	4.20236	5.50896	6.2093
NR_030682	2810410L24Rik	chr11	3	0	0	0.413043	0.75	0.428571	0.486486	0.301996	0.625	0.349682	1	4	1	4	4	46	4	56	38	2.57183	8.17327	1.60128	20.0402	7.32889
NM_026515	2810417H13Rik	chr9	4	0	1	0.566667	0.793103	0.625	0.625	0.120529	0.0023157	0.215327	0.15386	1	1	1	1	151	30	33	40	1.4007	73.8776	18.5576	25.0239	35.594
NM_027279	2810422O20Rik	chr1	3	0	1	0.340206	0.357143	0.833333	0.541667	0.00215155	0.42395	0.0385742	0.83882	6	4	3	4	98	15	12	24	3.27253	11.7467	2.81406	3.40625	6.85678
NM_027278	2810432D09Rik	chr4	4	0	0	0.546053	0.60274	0.578947	0.532609	0.291654	0.100644	0.289244	0.602412	4	4	4	4	154	74	59	97	11.3314	26.2564	18.0143	18.2739	26.9258
NM_025944	2810432L12Rik	chr4	4	0	0	0.623786	0.578947	0.645	0.584302	5.72229e-07	0.0266263	4.97297e-05	0.0020729	9	9	11	9	415	211	201	347	33.3718	17.8373	15.2541	15.8351	24.4091
NM_133703	2810453I06Rik	chr5	0	0	0	0.310345	0.542857	0.516129	0.4	0.0614283	0.735879	1	0.753906	4	4	4	1	29	35	31	11	0.78041	1.64469	1.71907	2.016	1.31033
NM_026054	2810474O19Rik	chr6	3	0	0	0.433333	0.444444	0.4375	0.666667	0.584665	0.617719	0.803619	1	5	8	4	1	32	36	16	3	4.34669	3.81831	3.66268	4.8976	2.94582
NM_028377	2900006K08Rik	chr12	0	0	0	NA	NA	NA	0.625	NA	NA	NA	0.726562	0	0	0	2	NA	NA	NA	8	4.39423	0.541636	0.256966	0.930747	0.945237
NM_175190	2900010J23Rik	chr2	4	0	0	0.579151	0.521583	0.695035	0.477833	0.000362922	0.509496	4.1535e-06	0.574572	3	3	3	3	526	280	141	204	158.504	312.506	188.632	178.747	202.507
NM_144518	2900011O08Rik	chr16	3	1	1	0.8	0.597222	0.731959	0.944	0.00143091	0.124918	5.45855e-06	3.98144e-27	6	8	8	8	30	73	99	125	158.973	1.87084	7.20301	10.838	12.9176
NM_172884	2900026A02Rik	chr5	0	0	0	0.75	0.636364	NA	NA	0.625	0.0580641	NA	NA	1	13	0	0	4	56	NA	NA	7.63207	0.406506	2.63112	0.0759281	0.107954
NM_029823	2900062L11Rik	chrX	4	4	0	0	0.00675676	1	0	6.46235e-27	8.35174e-43	2.52435e-29	1.2326e-32	4	7	7	7	88	150	96	108	23.4099	5.75853	15.7133	9.5529	9.9354
NM_133749	2900064A13Rik	chr2	4	0	1	0.668919	0.685714	0.786667	0.64	4.82914e-05	1.31432e-05	6.11416e-07	0.00222649	2	2	2	2	149	140	76	126	102.49	102.326	73.4193	89.698	138.531
NM_026064	2900073G15Rik	chr17	4	0	0	0.691023	0.622667	0.599078	0.615686	3.76708e-17	1.87624e-11	4.84235e-07	1.95938e-07	2	5	5	5	483	759	659	511	29.2697	74.4877	151.478	209.129	98.1483
NR_027891	2900092D14Rik	chr1	3	0	0	0.277778	0.526316	0.666667	0.5	0.011331	0.871415	0.301758	1	5	5	2	7	37	40	15	40	7.0714	2.56478	4.58423	3.02586	4.18177
NM_030240	2900092E17Rik	chr7	4	0	0	0.676783	0.601562	0.69419	0.66129	2.45048e-38	0.00138797	1.69955e-12	7.49235e-16	13	13	13	13	1335	257	329	627	35.7243	72.4063	21.4649	28.9972	51.6944
NM_026543	3010026O09Rik	chr11	4	0	1	0.252033	0.475	0.407407	0.638889	3.31735e-08	0.874629	0.442068	0.132498	3	3	3	3	125	40	28	36	15.1622	32.1354	11.4344	9.02573	12.327
NM_025849	3110001D03Rik	chr4	4	0	0	0.508264	0.428571	0.545455	0.560606	0.847129	0.229864	0.390927	0.191499	3	3	3	3	245	86	111	132	34.7514	72.2882	61.5759	42.1022	65.5701
NM_029623	3110002H16Rik	chr18	4	0	0	0.522059	0.482759	0.403846	0.438202	0.668266	0.780739	0.0619264	0.289096	5	5	5	5	137	118	104	90	16.5237	16.4759	14.9535	19.4397	17.7977
NM_028440	3110003A17Rik	chr10	3	1	2	NA	0.75	0.734177	1	NA	0.000234446	3.76151e-05	9.53674e-07	0	4	6	5	NA	57	81	21	12.2548	NA	9.34118	10.4069	4.00508
NM_178399	3110035E14Rik	chr1	4	0	2	0.20107	0.16	0.49201	0.354719	4.83971e-297	2.48148e-37	0.110924	8.66159e-47	35	32	36	35	3577	328	10213	2434	79.9227	76.6189	8.85417	384.553	81.4461
NM_026077	3110040N11Rik	chr7	4	0	1	0.846154	0.652174	0.62	0.54717	3.48585e-10	0.0154323	0.0209787	0.382126	5	6	7	6	79	69	100	108	19.6425	6.26145	9.47465	12.6162	16.4883
NM_001081343	3110043O21Rik	chr4	4	0	0	0.482759	0.376147	0.570093	0.584158	0.645917	0.0124036	0.17564	0.0200124	19	14	18	18	233	110	109	203	16.0005	9.78507	6.51094	7.50998	11.9329
NR_003549	3110048L19Rik	chr17	0	0	0	0.153846	0.225806	0.416667	0	0.0224609	0.00332689	0.541256	0.00195312	3	5	4	2	13	31	26	10	10.3589	0.798078	1.30461	1.50364	0.747564
NM_026085	3110049J23Rik	chr10	0	0	0	NA	0.166667	NA	NA	NA	0.21875	NA	NA	0	2	0	0	NA	6	NA	NA	0.723224	0.229925	1.0181	0.641327	0.162828
NM_001166497	3110052M02Rik	chr17	1	0	0	0.710843	0.428571	0.416667	0.824561	0.000154559	1	0.312327	7.51304e-07	12	2	8	7	84	7	50	58	6.58584	1.73362	0.902267	3.41015	1.69039
NM_175195	3110056O03Rik	chr10	4	0	0	0.547945	0.52	0.547284	0.517241	0.176408	0.620729	0.0389692	0.704768	16	16	16	16	223	202	505	179	16.1126	11.8719	17.0651	40.2187	14.7757
NM_026622	3110057O12Rik	chr3	4	0	2	0.455696	0.544118	0.285714	0.266667	0.499897	0.544612	0.0079159	6.4949e-05	10	12	8	11	79	68	42	75	7.60673	3.55864	3.32286	4.58764	6.17597
NM_199145	3110062M04Rik	chr6	0	0	0	0.7	0.333333	0.222222	0.571429	0.115318	0.6875	0.179688	1	1	1	1	1	21	6	9	7	0.3122	0.682368	0.345316	0.547204	0.459076
NM_028474	3110082D06Rik	chr17	1	0	1	0.52381	0.666667	0	0.275	0.877614	1	0.25	0.00642658	9	1	1	8	43	3	3	40	3.90742	2.68898	1.21349	0.977558	3.18733
NM_028469	3110082I17Rik	chr5	4	0	0	0.511364	0.515152	0.5625	0.615385	0.915187	1	0.803619	0.32694	3	3	2	3	90	33	17	26	5.85054	20.3748	7.81377	9.0989	8.13169
NM_025699	3230401D17Rik	chr2	4	0	0	0.503268	0.525974	0.609375	0.553571	0.954425	0.572846	0.00298728	0.189505	9	9	9	9	309	157	193	168	18.8736	22.7097	24.5505	23.0353	23.221
NM_027017	3300002I08Rik	chr2	1	0	0	0.333333	NA	0.428571	0.777778	0.6875	NA	0.663624	0.179688	2	0	2	3	6	NA	21	9	1.66007	2.00487	2.1091	5.33381	3.88902
NM_178141	3830406C13Rik	chr14	0	0	0	0	NA	0.714286	NA	0.0078125	NA	0.453125	NA	1	0	1	0	10	NA	7	NA	1.22744	1.05208	0.432583	1.28386	1.75089
NR_030715	3930402G23Rik	chr8	0	0	0	0.666667	NA	NA	NA	1	NA	NA	NA	1	0	0	0	3	NA	NA	NA	0.367632	3.47203	1.32719	0.155643	0.28452
NM_198651	4430402I18Rik	chr19	1	0	1	0.307692	0.26087	0.285714	0.416667	0.266846	0.0346897	0.179565	0.774414	4	5	3	3	15	24	14	12	3.13433	1.73234	2.16675	3.29455	1.84021
NM_001081295	4631416L12Rik	chr3	4	0	0	0.506195	0.561453	0.664894	0.587896	0.698977	3.65604e-06	9.86474e-20	0.00124529	33	33	33	25	1138	1454	761	348	12.1657	20.3584	33.2387	18.0992	9.99457
NM_172652	4632411B12Rik	chr1	4	0	1	0.24129	0.497253	0.57329	0.440678	4.71339e-49	0.958208	0.0119081	0.0475694	22	22	22	22	783	368	310	298	16.8531	27.5702	19.5166	17.6562	17.0432
NR_027985	4632415L05Rik	chr3	4	0	4	0.708464	0.744898	0.733728	0.709251	6.32758e-14	4.26121e-12	9.80755e-10	2.42375e-10	27	22	22	24	322	197	171	230	8.27746	8.54209	9.26493	6.93817	10.3286
NR_015510	4632427E13Rik	chr7	4	0	2	0.736842	0.7	0.5	0.642857	0.0635681	0.115318	1	0.42395	3	3	3	2	19	20	12	14	5.91033	3.29284	4.44629	4.37155	3.63241
NM_001080995	4632434I11Rik	chr7	2	0	2	0.730769	NA	0.8	0.8	0.0289593	NA	0.375	0.0351562	1	0	1	1	27	NA	5	15	0.269746	16.5082	3.77611	5.26755	12.6824
NM_172698	4732418C07Rik	chr4	4	0	0	0.501404	0.562044	0.511471	0.472897	0.970109	0.00416687	0.218446	0.226036	21	21	22	20	723	552	3022	540	24.6179	20.5185	20.678	108.574	22.8147
NM_176987	4732471D19Rik	chr13	4	0	1	0.63	0.505495	0.709677	0.431373	0.012033	1	0.001299	0.401062	9	9	9	8	101	91	62	51	11.5372	11.9616	13.8211	10.41	10.2528
NR_030700	4831440E17Rik	chr5	0	0	0	NA	1	NA	NA	NA	0.25	NA	NA	0	1	0	0	NA	3	NA	NA	0.814334	0.16908	0.395351	0.15159	0.0962187
NM_001113550	4833420G17Rik	chr13	0	0	0	0.857143	0.8	0.846154	0.875	0.0129395	0.0118179	0.0224609	0.00418091	2	2	2	2	14	20	13	16	0.248492	0.482777	1.15562	0.378732	0.419594
NM_029425	4833424O15Rik	chr3	0	0	0	0.333333	NA	0.333333	0.736842	0.6875	NA	1	0.0635681	2	0	1	5	6	NA	3	19	10.7336	0.181579	0.377716	0.810846	2.4259
NM_133797	4833439L19Rik	chr13	4	0	0	0.558906	0.55563	0.574201	0.55051	4.57859e-09	1.47502e-09	5.68911e-10	8.45422e-06	14	14	14	14	2515	2998	1777	1974	83.3486	99.0863	171.826	121.248	113.842
NM_001033474	4921506J03Rik	chr10	4	0	0	0.526779	0.564955	0.543618	0.599498	0.0511095	4.75666e-05	0.00437138	6.1861e-12	17	17	17	17	1372	1005	1107	1205	81.3964	66.4196	73.0893	78.5519	93.5291
NM_001081154	4921513D23Rik	chr16	4	0	0	0.486275	0.525424	0.503401	0.506796	0.397897	0.366261	0.92414	0.791509	18	18	18	18	1031	363	442	518	72.116	31.4472	23.9875	29.144	27.9659
NM_025722	4921524J17Rik	chr8	2	0	1	0.638889	0.25	0.705882	0.555556	0.132498	0.145996	0.143463	0.814529	1	1	1	1	36	12	17	18	2.27849	3.75386	1.96574	3.27823	2.25713
NM_199316	4922501C03Rik	chr9	4	0	0	0.520446	0.409091	0.411111	0.416667	0.542133	0.0695652	0.113344	0.312327	22	17	18	11	272	112	91	48	7.76394	7.61666	5.63288	4.82031	3.41655
NM_175176	4922501L14Rik	chr3	3	2	1	1	0.218182	0.941176	0	0.5	3.30538e-05	1.96749e-11	2.06795e-25	1	6	8	9	3	55	53	84	11.7944	0.281159	7.12299	4.98479	7.39198
NM_029432	4930402H24Rik	chr2	4	0	0	0.549784	0.496599	0.429553	0.50805	0.147599	0.825926	1.70874e-06	0.735123	15	16	16	16	231	1345	1178	561	35.4274	11.0551	82.7483	84.3631	48.5918
NM_001014836	4930404N11Rik	chr10	1	0	1	0.454545	0.333333	0.230769	0.333333	1	1	0.0922852	0.507812	2	1	1	1	11	3	13	9	5.85655	2.84456	1.61944	4.33553	5.30953
NM_001081029	4930420K17Rik	chr5	4	4	0	0.891026	0.868852	0.93617	0.872	5.43719e-25	1.26947e-25	2.46473e-10	3.42225e-18	6	6	5	6	157	187	48	127	8.62203	8.34696	15.7045	6.99658	11.1137
NM_197997	4930422G04Rik	chr3	4	0	1	0.373626	0.358974	0.413793	0.25	0.0205842	0.108129	0.458258	0.0768127	6	6	6	3	92	39	29	16	0.982049	7.76006	3.52564	3.08157	3.4872
NM_001142943	4930422I07Rik	chr9	0	0	0	NA	0.428571	1	NA	NA	1	0.25	NA	0	2	1	0	NA	7	3	NA	1.13069	0.145372	0.413809	0.582881	0.257372
NM_134041	4930427A07Rik	chr12	1	0	0	0.533333	0.666667	0.75	0	1	1	0.625	0.25	1	1	1	1	15	3	4	3	0.493948	14.2096	3.40266	4.88683	4.56051
NR_027966	4930429B21Rik	chr3	0	0	0	NA	0.666667	NA	NA	NA	1	NA	NA	0	1	0	0	NA	3	NA	NA	4.73117	0.724909	2.88889	1.36484	1.57089
NM_001025373	4930432O21Rik	chr17	3	0	0	0.366667	0.519231	0.338028	0.634146	0.200488	0.889884	0.00855454	0.117275	5	8	9	5	30	52	72	41	11.7294	2.78912	4.14613	8.23348	4.08207
NM_029037	4930444A02Rik	chr8	4	0	0	0.606596	0.574209	0.559551	0.621951	5.6287e-10	0.00303399	0.0136102	8.99144e-07	25	24	22	24	853	417	453	415	15.5258	21.6465	17.2799	21.0422	19.7702
NM_053264	4930444G20Rik	chr10	0	0	0	NA	NA	NA	0	NA	NA	NA	0.125	0	0	0	1	NA	NA	NA	4	0.262367	0.19115	0.226717	0.149955	0.355342
NM_028934	4930452B06Rik	chr14	3	1	2	0.0333333	0.242991	0	0.238095	1.42157e-72	9.37451e-08	2.98023e-08	1.36521e-10	12	11	5	12	301	107	26	152	5.04111	14.4754	5.7278	2.83492	13.7082
NM_026273	4930453N24Rik	chr16	4	0	0	0.535714	0.491228	0.52	0.493827	0.508513	1	0.817554	1	3	3	3	3	114	57	76	84	24.7704	22.0677	20.7176	24.6361	23.1939
NM_024273	4930455C21Rik	chr16	4	0	3	0.71167	0.743902	0.745665	0.655963	3.91652e-19	3.05246e-10	6.99905e-11	4.80754e-06	11	10	10	11	441	165	175	220	11.0023	26.0532	13.2377	19.4144	27.0399
NM_029115	4930455F23Rik	chr1	4	0	1	0.238095	0.382353	0.684211	0.380952	5.98424e-20	0.0681187	0.00750818	0.0769258	5	5	5	5	298	68	57	63	22.826	34.6842	14.6016	12.6337	14.0184
NM_175675	4930471M23Rik	chr5	4	0	0	0.535014	0.535948	0.497992	0.60479	0.203944	0.229894	1	0.000151746	17	17	17	16	363	311	254	340	15.3198	16.6779	24.3112	20.2149	23.8003
NM_001081012	4930473A06Rik	chr4	0	0	0	0.8	0.666667	0.6	NA	0.375	1	1	NA	1	1	1	0	5	3	5	NA	1.19507	0.836351	1.47463	2.03687	0.954728
NM_172967	4930503L19Rik	chr18	4	0	0	0.606407	0.592593	0.584746	0.641618	1.00254e-05	0.0224057	0.0798343	0.00024099	14	14	14	14	440	165	120	174	5.06345	20.8336	9.68515	8.47163	11.5106
NM_001162896	4930523C07Rik	chr1	1	1	0	0	0.857143	NA	0.548387	5.68434e-14	0.00148964	NA	0.7201	4	6	0	5	46	21	NA	31	1.01671	3.16607	1.61505	0.13188	2.99117
NR_033593	4930529C04Rik	chr3	0	0	0	0	0	0	NA	0.00195312	0.03125	0.25	NA	1	1	1	0	10	6	3	NA	1.54796	0.495903	0.45536	0.175691	0.254894
NM_181815	4930534B04Rik	chr12	4	0	0	0.462264	0.523077	0.395833	0.5	0.197051	0.804317	0.0519105	1	16	11	14	11	322	66	98	58	3.14505	13.9832	4.1978	6.67394	4.75572
NM_029198	4930538K18Rik	chr4	0	0	0	NA	0.833333	NA	NA	NA	0.21875	NA	NA	0	1	0	0	NA	6	NA	NA	1.54647	0.150226	0.694893	0.2357	0.23937
NR_030689	4930539J05Rik	chr3	2	1	0	0.857143	0.666667	0.454545	0.75	0.0129395	1	1	0.625	1	1	1	1	14	3	11	4	3.81005	3.41643	3.56585	4.82425	3.26624
NM_029249	4930547N16Rik	chr10	0	0	0	0.833333	NA	NA	NA	0.21875	NA	NA	NA	1	0	0	0	6	NA	NA	NA	0.512875	7.09954	1.7949	2.61375	3.00175
NM_001163728	4930563E22Rik	chr11	0	0	0	0	NA	0.666667	NA	0.015625	NA	1	NA	2	0	1	0	7	NA	3	NA	1.29079	0.307076	0.29137	0.535327	0.163098
NM_198607	4930572J05Rik	chr15	3	0	0	0.48	0.470588	0.606061	0.714286	1	1	0.296206	0.453125	4	2	4	2	25	17	33	7	19.8904	3.60623	3.51183	9.05292	3.50818
NM_001077684	4930578N16Rik	chr2	0	0	0	0.25	0.6	NA	NA	0.625	1	NA	NA	1	1	0	0	4	5	NA	NA	2.75452	1.33789	2.1364	1.02396	0.987901
NM_029482	4930579G24Rik	chr3	4	0	0	0.608392	0.647059	0.5	0.55102	0.0118499	0.121449	1	0.568172	6	5	6	4	143	34	64	49	2.02495	13.87	4.65933	9.01101	9.38008
NM_133732	4931406C07Rik	chr9	4	0	0	0.453125	0.534247	0.503185	0.357664	0.219772	0.456482	1	0.00109102	10	11	10	10	192	147	160	137	10.9281	13.1401	24.319	21.7234	22.4832
NM_172741	4931406P16Rik	chr7	4	0	0	0.514039	0.579181	0.520566	0.473613	0.411346	1.22262e-07	0.266383	0.162112	21	21	21	21	934	1135	784	751	11.9388	27.0657	51.921	40.8937	36.8504
NM_027627	4931408A02Rik	chr16	2	0	2	0.735294	NA	1	0.727273	0.00904119	NA	0.25	0.226562	2	0	1	2	35	NA	3	11	0.767064	7.88753	1.60374	1.59682	4.17002
NM_028890	4931414P19Rik	chr14	4	0	2	0.152174	0.65	0.363636	0.294118	1.83154e-06	0.263176	0.548828	0.0243065	4	2	2	5	46	21	12	35	2.55308	8.4345	4.57172	4.11404	7.13757
NR_015524	4932415G12Rik	chr10	3	0	0	0.408163	0.460526	0.326531	0.333333	0.25287	0.566573	0.0212941	0.0435585	6	10	7	5	49	76	49	43	11.4677	2.21295	4.06344	4.50082	3.13433
NM_172679	4932438A13Rik	chr3	4	0	0	0.571429	0.571429	0.431373	0.510204	0.313503	0.49956	0.401062	1	4	4	4	3	64	35	51	50	34.997	11.3304	14.6281	16.0195	12.2342
NM_178935	4932441K18Rik	chrX	2	2	0	0	0	1	0	4.76837e-07	0.03125	0.000488281	0.0625	1	1	2	1	24	6	12	5	8.66786	7.86367	5.30046	4.37646	4.63372
NM_001101519	4932443I19Rik	chr8	0	0	0	NA	0.666667	NA	NA	NA	1	NA	NA	0	1	0	0	NA	3	NA	NA	1.74963	0.216972	1.02937	NA	NA
NM_153794	4933403F05Rik	chr18	4	0	0	0.508897	0.550069	0.510135	0.553535	0.570922	0.00761826	0.651236	0.000837851	70	66	60	81	1134	735	597	995	9.75545	11.6153	10.0773	9.97047	15.8319
NR_015555	4933404O12Rik	chr5	4	0	0	0.401813	0.685714	0.539007	0.483333	0.00041876	0.000178357	0.399787	0.784328	24	18	26	22	334	106	145	121	5.79421	10.5029	5.00309	5.31427	5.71448
NM_001081101	4933407H18Rik	chr5	3	0	0	0.486486	0.518987	0.604396	0.473684	0.907561	0.690925	0.0585735	0.871415	15	19	13	10	75	159	91	39	4.65511	2.23596	6.97931	4.27027	3.48906
NR_029443	4933407K13Rik	chrX	0	0	0	0	0	1	0.666667	2.32831e-10	7.45058e-09	9.09495e-13	1	7	4	8	1	33	29	41	3	1.66258	1.18828	1.90563	2.15322	0.640021
NR_033123	4933409K07Rik	chr4	4	4	0	0.0232558	0.0245989	0.0217588	0.045082	1.16704e-262	4.43359e-236	2.47942e-283	1.73855e-163	7	7	7	8	1043	948	1116	733	236.045	52.0168	102.193	134.912	56.7191
NM_025747	4933411K20Rik	chr8	4	0	0	0.516484	0.444444	0.579545	0.554545	0.711027	0.289798	0.0415249	0.294234	14	12	14	13	184	110	181	112	11.7246	9.71595	7.9985	13.9901	9.98928
NM_001039478	4933421E11Rik	chr3	0	0	0	0.75	0.666667	1	1	0.625	1	0.03125	0.125	1	1	1	1	4	3	6	4	1.16222	0.493934	0.351503	0.387485	0.505951
NM_178682	4933426M11Rik	chr12	4	0	0	0.654762	0.632979	0.6	0.644836	1.48542e-08	0.00032713	0.0015132	8.37188e-09	6	6	6	6	336	194	264	397	15.0715	42.5766	34.0482	45.0687	82.4952
NM_028963	4933427D14Rik	chr11	4	0	0	0.317857	0.537634	0.487805	0.46875	1.04253e-09	0.53406	1	0.86005	18	14	9	7	281	94	41	33	11.3623	10.7311	5.10348	3.60058	3.38654
NR_015459	4933431E20Rik	chr3	4	3	1	0.963415	0.795181	0.980392	0.983607	3.80354e-20	5.60293e-08	4.61853e-14	5.37764e-17	6	7	6	6	82	84	51	63	2.72716	7.16904	14.8591	7.75557	9.80791
NM_029407	4933432B09Rik	chr15	0	0	0	0.692308	0.571429	0.5	NA	0.266846	1	1	NA	3	2	2	0	15	7	8	NA	4.46165	0.707831	0.836951	0.956797	0.555253
NM_178613	4933433P14Rik	chr12	4	0	0	0.563291	0.489552	0.582329	0.477041	0.028082	0.743107	0.0110998	0.390572	19	18	18	16	317	338	251	395	18.3458	10.0156	11.1386	10.7519	16.1527
NM_025762	4933434E20Rik	chr3	4	0	0	0.45977	0.509881	0.570447	0.541872	0.21565	0.801505	0.0188806	0.261396	5	5	5	5	264	256	300	206	23.8104	21.1162	27.4126	36.702	25.7789
NR_015585	4933439C10Rik	chr11	4	1	2	0.443548	0.746835	0.892308	0.717949	0.242923	1.29671e-05	4.27052e-11	0.0094753	11	11	10	9	127	79	66	39	7.18708	10.1414	3.55497	5.14648	4.36349
NM_025757	4933439F18Rik	chr11	4	0	0	0.364198	0.655914	0.510949	0.607477	1.16274e-06	0.00346185	0.864405	0.0329467	9	6	9	9	327	94	138	107	22.7369	18.8711	10.0858	17.9261	14.1346
NM_198642	5031414D18Rik	chr14	0	0	0	0	NA	NA	NA	0.25	NA	NA	NA	1	0	0	0	3	NA	NA	NA	0.888329	0.191763	0.212281	0.167151	0.271605
NR_027890	5031426D15Rik	chr2	0	0	0	0	NA	NA	NA	0.25	NA	NA	NA	1	0	0	0	3	NA	NA	NA	4.46655	0.103194	0.0534089	0.014719	NA
NR_033624	5031434O11Rik	chr3	0	0	0	NA	0.384615	NA	NA	NA	0.581055	NA	NA	0	3	0	0	NA	13	NA	NA	2.03028	NA	1.68423	0.123776	0.377108
NM_001033273	5031439G07Rik	chr15	4	0	0	0.54644	0.577297	0.659806	0.632054	0.0201984	2.90033e-06	2.69958e-20	2.98078e-08	35	35	37	33	655	935	851	447	23.1341	13.9753	26.2654	26.4531	13.9154
NM_026362	5033414D02Rik	chr19	4	0	0	0.57047	0.496063	0.520548	0.525	0.101003	1	0.679164	0.64826	3	3	3	3	150	127	146	120	18.934	33.5693	33.855	37.4257	42.4925
NM_001048060	5133401N09Rik	chr13	0	0	0	0.4	0.833333	NA	1	1	0.21875	NA	0.5	1	1	0	1	5	6	NA	3	0.955844	1.0059	2.64308	1.15332	0.801397
NR_028300	5330426P16Rik	chr16	3	1	2	0.712766	0.724138	1	0.964286	4.49643e-05	0.0241195	0.0625	2.16067e-07	6	5	1	5	98	30	5	28	1.92222	7.28235	3.41065	1.17188	3.91749
NR_015552	5330434G04Rik	chrX	0	0	0	0	0	NA	NA	0.015625	0.000244141	NA	NA	2	3	0	0	7	13	NA	NA	4.36652	0.212903	0.745898	0.128477	0.182668
NM_001160363	5430405G05Rik	chr2	0	0	0	0.615385	0.666667	NA	0.571429	0.581055	1	NA	1	2	1	0	2	14	3	NA	7	3.67224	1.69494	1.29034	1.05136	1.6958
NM_145509	5430435G22Rik	chr1	1	0	0	NA	0.333333	0.43956	0.378378	NA	1	0.29447	0.187742	0	1	14	8	NA	3	91	37	3.04218	0.201492	1.72068	5.26893	2.14038
NM_026636	5430437P03Rik	chr8	4	0	0	0.590674	0.566176	0.670213	0.59697	1.46943e-05	0.00861253	3.52696e-06	0.000505506	5	5	5	5	585	412	191	333	48.5229	75.9282	71.3545	46.8167	69.0287
NR_015467	5530601H04Rik	chrX	1	0	0	0.557823	0.495146	0.744444	0.305556	0.186765	1	3.79505e-06	0.0288167	10	10	8	6	147	104	92	36	4.98582	3.10274	2.9943	2.70714	1.71228
NM_025670	5730403B10Rik	chr16	4	0	0	0.507833	0.56975	0.56391	0.483077	0.691065	0.000309277	0.0122141	0.410136	18	20	20	18	772	687	408	658	78.2183	45.9936	71.1128	42.8793	71.9239
NM_172738	5730403M16Rik	chr7	4	0	2	0.584615	0.486486	0.708738	0.708333	0.0650865	1	2.71764e-05	0.000534964	10	6	10	9	131	38	103	72	10.0337	9.81623	5.60428	9.615	8.21824
NR_027866	5730408K05Rik	chr19	3	0	1	0.481481	0.785714	0.5	0.6	1	0.057373	1	0.607239	2	2	1	2	27	14	4	15	4.2621	27.2074	5.89274	4.63996	12.7229
NM_027457	5730437N04Rik	chr17	4	0	0	0.536398	0.579572	0.333333	0.47839	0.0452936	0.00127012	2.84262e-16	0.279719	8	8	8	8	791	424	606	677	34.0739	59.8007	49.0146	69.5479	78.5093
NM_001081075	5730455O13Rik	chr19	4	0	0	0.620087	0.652174	0.644444	0.614286	0.00033841	0.00460911	0.00804593	0.0722379	10	9	10	9	232	92	92	70	12.7899	15.6768	8.2234	9.31876	7.72558
NM_027472	5730455P16Rik	chr11	4	0	0	0.459459	0.546154	0.616327	0.492537	0.253831	0.334688	0.000327715	0.931202	18	19	22	16	223	131	248	138	26.6887	8.45717	8.43825	11.6275	8.83161
NM_027464	5730469M10Rik	chr14	4	0	1	0.382353	0.711423	0.57563	0.52451	0.000343559	1.32609e-21	0.0230847	0.528715	10	10	10	10	240	504	240	205	77.9142	14.6633	30.1804	20.2963	25.2969
NM_001033157	5730507C01Rik	chr12	0	0	0	0.0126582	0	0	0.0294118	2.64698e-22	1.13687e-13	2.58494e-26	4.07454e-09	9	6	3	5	81	45	88	34	5.25023	1.55676	1.81886	2.87998	0.999622
NM_027482	5730508B09Rik	chr3	1	0	0	0.4375	0	0.456522	0	0.803619	0.25	0.658738	0.25	2	1	2	1	16	3	46	4	1.84997	2.81896	1.40426	12.1629	1.90898
NM_029086	5830415F09Rik	chr4	4	0	1	0.318182	0.35	0.5625	0.26087	0.0226288	0.263176	0.803619	0.0346897	3	3	3	3	45	22	16	23	2.27662	9.75253	4.79886	4.15244	5.08361
NR_028359	5830417I10Rik	chr3	4	0	0	0.382075	0.320755	0.407895	0.508475	0.000726808	7.2316e-06	0.0281928	1	15	13	14	6	214	159	152	59	6.04357	6.20398	6.59797	5.47981	3.10292
NM_176976	5830418K08Rik	chr9	4	0	0	0.468153	0.463333	0.527426	0.455285	0.0545073	0.225286	0.435759	0.180483	29	24	28	25	946	301	239	247	17.9624	20.6904	10.5578	10.6045	10.4765
NM_026368	5830433M19Rik	chr4	4	0	2	0.291139	0.290323	0.457143	0.354839	0.000263637	0.0294494	0.735879	0.149613	5	3	3	5	80	31	35	31	5.48662	7.41883	3.81194	3.61385	4.48095
NR_015517	5930412G12Rik	chr5	1	0	1	NA	0.769231	NA	NA	NA	0.00935531	NA	NA	0	1	0	0	NA	26	NA	NA	1.03964	NA	10.864	NA	NA
NM_029862	5930434B04Rik	chr2	4	0	0	0.650794	0.540284	0.515021	0.433333	1.9457e-06	0.270646	0.694354	0.120529	13	11	11	12	255	213	235	151	12.3671	15.4561	22.3983	25.0769	15.952
NM_177854	6030405A18Rik	chr3	2	1	0	0.5	0.138462	1	0.37037	1	8.92102e-18	0.00012207	0.247789	13	14	3	7	85	133	14	27	16.464	3.14924	9.90264	1.03418	2.30478
NM_176921	6030419C18Rik	chr9	4	0	1	0.463415	0.384615	0.238095	0.472826	0.755229	0.581055	3.76061e-05	0.507127	7	3	6	8	41	13	64	185	44.3783	5.01736	3.60814	13.2168	33.4934
NM_178801	6030446N20Rik	chr18	4	0	2	0.764706	0.769231	0.540984	0.644068	0.00293506	0.00935531	0.608921	0.0363432	4	4	5	5	34	26	63	59	3.19982	4.56781	3.77391	6.81718	8.91154
NM_029998	6030458C11Rik	chr15	4	0	0	0.574534	0.548872	0.627717	0.646809	0.00017692	0.125154	1.09775e-06	7.96445e-06	39	35	37	31	646	270	373	235	9.25468	8.48553	6.19036	8.6304	5.27698
NM_175234	6230409E13Rik	chr4	4	0	0	0.58309	0.637584	0.616883	0.551724	0.00244752	2.35212e-06	4.84975e-05	0.244884	37	27	33	22	343	299	311	145	19.7092	5.63519	6.23908	7.77897	3.90186
NM_001081227	6330403A02Rik	chr1	0	0	0	NA	0.5	NA	NA	NA	1	NA	NA	0	4	0	0	NA	12	NA	NA	48.4312	0.0842161	0.547945	0.0755044	0.01917
NM_134022	6330403K07Rik	chr11	1	0	1	0.47619	0.181022	NA	0.666667	1	3.13511e-67	NA	1	5	11	0	1	21	693	NA	3	251.492	1.69667	71.1873	0.388212	0.506901
NM_026138	6330407J23Rik	chr10	1	0	0	0.685714	0.641975	0.611111	1	0.0409596	0.00037504	0.480682	0.25	6	11	4	1	35	165	19	3	25.9865	2.36189	7.08998	1.70689	0.34213
NM_177312	6330408A02Rik	chr7	0	0	0	0.25	0.666667	0.642857	0.333333	0.145996	0.6875	0.42395	1	2	1	3	1	12	7	15	3	1.96255	1.04602	1.84896	2.46176	0.967774
NM_025697	6330409N04Rik	chr14	4	0	0	0.503817	0.551724	0.626667	0.672414	1	0.511842	0.0369549	0.0119281	4	2	5	4	131	60	76	58	39.4128	16.9455	9.6092	14.8405	12.7815
NM_144905	6330416G13Rik	chr4	1	0	0	0.578947	0.6	0.565217	0.1875	0.0617485	0.424356	0.677639	0.000535053	27	5	5	7	152	25	24	33	6.06301	4.65261	1.90465	2.14844	2.5538
NM_176962	6330416L07Rik	chr17	3	0	2	0.5	0.5	0.227273	0.2	1	1	0.0169005	0.109375	4	1	2	1	43	6	22	10	10.9861	5.07228	3.86953	7.89461	3.42684
NM_172859	6330439K17Rik	chr2	0	0	0	0.647059	0.631579	0.646154	0.487179	0.332306	0.359283	0.024812	1	5	6	13	9	17	20	66	39	67.3574	0.545748	1.64766	2.63366	1.15946
NM_182995	6330503K22Rik	chr7	4	0	0	0.539267	0.637681	0.466019	0.457831	0.137767	0.0294935	0.554601	0.312974	16	14	16	16	386	71	103	166	39.9123	14.4596	4.59118	7.20241	9.50711
NM_001081174	6330545A04Rik	chr4	0	0	0	0.6	NA	0.25	1	1	NA	0.625	0.25	1	0	1	1	5	NA	4	3	1.52858	1.96004	0.338144	1.39784	1.51425
NR_003619	6330549D23Rik	chr3	0	0	0	0.25	0.5	NA	NA	0.625	1	NA	NA	1	1	0	0	4	4	NA	NA	1.42901	1.53796	1.84781	1.03415	1.75041
NM_026377	6330577E15Rik	chr19	4	0	4	0.777778	0.766423	0.810256	0.791809	2.36608e-39	2.57763e-19	1.03879e-36	1.20826e-24	5	5	5	5	539	280	394	294	73.6666	133.095	96.8484	102.06	114.679
NM_198006	6330578E17Rik	chr1	4	0	0	0.438976	0.6537	0.639291	0.551282	2.09013e-06	1.13806e-23	3.74291e-12	0.000498133	17	17	17	17	1544	1063	627	1178	36.3649	90.4827	66.5656	51.3401	96.2664
NM_001033383	6430526N21Rik	chr7	3	0	1	0.52381	0.722222	0.466667	0.666667	1	0.0962524	1	0.507812	3	2	3	1	21	18	15	9	4.00331	4.49539	5.60604	5.48578	3.9112
NM_145836	6430527G18Rik	chr12	4	0	0	0.614286	0.55	0.53125	0.620253	0.00855655	0.518958	0.610068	0.0421654	6	4	6	6	141	60	97	81	8.35724	16.0306	12.0434	13.1469	22.6102
NM_001145351	6430550D23Rik	chr2	0	0	0	0	0	0.142857	0	0.25	0.25	0.125	0.25	1	1	1	1	3	3	7	4	0.2019	0.211215	0.300618	0.568098	0.33655
NM_175521	6430598A04Rik	chr5	0	0	0	0.714286	NA	NA	0.5	0.453125	NA	NA	1	2	0	0	1	7	NA	NA	4	13.1126	1.40365	0.620004	0.835353	1.49105
NM_001142965	6430704M03Rik	chr4	0	0	0	NA	0.796875	0.857143	0.73913	NA	1.88096e-06	0.0129395	0.0346897	0	17	4	7	NA	64	14	23	58.5696	0.131906	1.83567	1.12676	1.65807
NM_029541	6530401D17Rik	chrX	1	1	0	0	0	1	0	0.015625	9.53674e-07	0.00195312	0.0625	1	2	3	1	7	21	11	5	11.8134	2.53825	6.05498	2.35581	4.44319
NM_029545	6530401N04Rik	chr12	4	0	3	0.734568	0.633663	0.716216	0.761905	1.92893e-09	0.00933505	0.000256489	3.76061e-05	9	6	6	5	164	102	75	63	4.84182	7.00554	5.14219	6.22161	5.08987
NR_029460	6530402F18Rik	chr2	0	0	0	0.878788	0.454545	0.689655	0.352941	1.09286e-05	0.831812	0.0614283	0.332306	7	4	5	4	34	22	30	18	4.86366	2.22413	1.98549	2.7669	2.91482
NM_001163356	6530418L21Rik	chr3	0	0	0	1	1	0.8	0.714286	0.0078125	0.0078125	0.375	0.453125	1	1	1	1	8	8	5	7	0.0383135	0.111655	0.335489	0.0973241	0.158143
NM_175398	6530418L21Rik	chr3	3	0	0	0.6	0.561224	0.621622	0.590909	0.0156936	0.266406	0.0132336	0.175286	2	2	2	1	158	100	113	68	1.16913	3.5934	3.45522	3.73349	2.89159
NR_015505	6720401G13Rik	chrX	1	1	0	0	0.142857	1	0	0.000976562	0.125	2.27374e-13	0.03125	2	2	3	1	11	7	43	6	1.64806	1.18843	0.894662	5.0545	0.876399
NM_133937	6720456B07Rik	chr6	4	2	2	0.846591	0.823529	0.877358	0.885496	1.21261e-21	2.257e-11	4.54276e-16	1.60647e-20	1	1	1	1	179	105	108	132	154.687	146.964	141.111	117.274	191.595
NR_030708	6820431F20Rik	chr8	4	4	0	0.0936639	0.107223	0.0795148	0.141304	3.48879e-122	2.07486e-207	1.44153e-135	3.51281e-70	6	7	6	7	728	1359	745	554	199.207	68.0487	248.34	120.321	77.7192
NM_178670	8030462N17Rik	chr18	4	0	0	0.45	0.468085	0.566038	0.588235	0.368202	0.770867	0.410103	0.262438	3	3	3	3	101	48	54	51	17.3608	16.2778	10.4902	13.3531	16.9315
NM_028984	8430406I07Rik	chr2	4	0	2	0.540773	0.703297	0.7	0.604167	0.238246	0.000132163	0.00109324	0.0153705	12	11	10	11	236	93	72	144	2.49172	11.852	6.05849	5.04174	12.3019
NM_173737	8430410A17Rik	chr6	4	0	0	0.504132	0.536585	0.623656	0.581818	1	0.755229	0.0220186	0.28061	9	6	9	9	123	42	95	55	10.8277	11.1605	8.05652	11.2748	8.37981
NM_145609	8430410K20Rik	chr9	4	0	0	0.567702	0.510989	0.516569	0.516779	0.000137931	0.637855	0.479965	0.436435	17	17	17	17	809	554	517	606	37.0298	32.3184	32.2221	32.8007	44.5576
NM_001123370	9030025P20Rik	chr17	4	0	0	0.625	0.611111	0.32	0.616667	0.0599412	0.480682	0.0153467	0.092461	2	2	2	2	64	18	50	60	6.89812	5.75507	3.60255	14.0878	7.13231
NM_144531	9030409G11Rik	chr4	1	0	0	0.485714	0	0.333333	0.741935	1	0.03125	1.09199e-06	0.0106738	8	2	18	6	35	6	221	31	2.18972	1.56868	0.67873	9.60857	2.03962
NM_001081289	9030418K01Rik	chr2	2	0	0	0.0714286	0.571429	0.538462	0.679245	3.03239e-06	0.663624	0.749259	0.0126603	5	5	10	9	28	21	40	53	13.6764	2.09573	2.5922	4.93222	4.53195
NM_027823	9030420J04Rik	chr9	4	0	0	0.642674	0.606897	0.598765	0.601504	1.9739e-08	0.000325116	0.0146124	0.0238011	12	13	12	12	392	291	164	133	2.93749	14.9992	14.5494	9.90535	11.4586
NM_027829	9030607L17Rik	chr10	1	0	0	NA	0.454545	0.6	1	NA	1	1	0.03125	0	1	1	1	NA	11	5	6	12.8321	1.44524	5.31388	6.42472	3.16642
NM_145448	9030617O03Rik	chr12	4	0	3	0.743819	0.706488	0.695473	0.703548	2.13872e-104	8.35806e-39	1.01197e-09	2.7847e-81	23	22	21	22	1916	985	244	2165	5.49238	45.2369	38.4167	11.5548	77.5715
NM_027815	9030624J02Rik	chr7	4	0	0	0.485178	0.532698	0.549801	0.514512	0.361982	0.0827058	0.00696343	0.445631	17	17	17	17	1021	740	758	762	28.8785	42.0162	46.6941	49.7143	52.9045
NM_172488	9030625A04Rik	chr14	4	3	1	0.996124	1	0.793651	1	1.11838e-75	9.09495e-13	1.98453e-11	1.4013e-45	7	7	8	9	258	42	128	152	2.13935	12.3057	3.95488	10.3681	10.7899
NM_198296	9130011E15Rik	chr19	4	0	0	0.609929	0.488479	0.550296	0.449612	0.0112569	0.786052	0.218294	0.290688	18	18	19	15	142	217	170	129	13.1915	5.42224	13.0473	12.3938	8.32901
NM_030226	9130019O22Rik	chr7	1	0	1	0.75	0.818182	0.928571	NA	0.012541	0.0654297	0.00183105	NA	3	3	3	0	29	11	14	NA	0.734712	3.00049	1.36823	2.87946	0.974762
NM_177001	9130023H24Rik	chr7	4	1	0	0.666667	0.44898	0.633333	0.913043	0.00247942	0.568172	0.200488	6.60419e-05	9	8	6	6	87	50	30	24	1.52634	3.18625	3.70427	3.19252	3.29249
NR_024325	9130024F11Rik	chr1	0	0	0	0.5	NA	NA	NA	1	NA	NA	NA	2	0	0	0	8	NA	NA	NA	2.65227	0.424357	0.237277	0.0951149	0.144894
NM_029418	9130401M01Rik	chr15	4	3	1	0.863813	0.864865	0.776316	0.875862	1.94833e-34	8.95742e-11	1.39687e-06	2.17359e-21	7	7	7	7	259	76	77	145	8.7421	25.8871	11.6254	15.5955	17.7665
NM_029960	9230104L09Rik	chr2	1	1	0	0	0	0	0	0.00195312	5.96046e-08	7.62939e-06	0.00012207	1	1	1	1	10	25	18	14	0.530217	0.858433	3.05448	2.42435	1.91496
NM_199017	9230110C19Rik	chr9	4	0	0	0.47619	0.388889	0.333333	0.611111	0.801306	0.480682	0.301758	0.242985	5	4	2	4	65	18	17	36	6.8301	9.57973	6.05983	4.11943	6.78415
NR_015537	9230114K14Rik	chr5	3	0	1	0.454545	0.681818	0.368421	0.708333	0.728332	0.133801	0.359283	0.0055152	4	3	3	6	33	22	21	48	3.37682	4.10702	2.77089	4.43535	7.56399
NR_028442	9330020H09Rik	chr15	0	0	0	1	1	NA	1	0.00390625	0.25	NA	0.03125	1	1	0	1	9	3	NA	6	1.22978	0.609668	0.187617	0.336086	0.892679
NM_178799	9330129D05Rik	chr5	2	0	0	0.666667	0.60274	0.5	0.45	0.6875	0.100644	1	0.823803	2	7	3	4	6	74	12	20	1.19967	1.42699	8.69946	2.79863	4.28225
NR_015497	9330133O14Rik	chr8	0	0	0	NA	0.307692	0.291667	0.444444	NA	0.266846	0.0639147	1	0	3	5	2	NA	13	24	9	4.14288	0.656469	0.893716	1.65693	1.13698
NR_033222	9330151L19Rik	chr12	0	0	0	0.85	0.727273	0.897436	0.714286	8.36458e-06	0.013531	3.35316e-07	0.0783539	7	4	6	5	40	34	40	21	3.10606	2.12983	2.27351	2.99356	1.69684
NM_001162537	9330159F19Rik	chr10	0	0	0	0.384615	0.369565	0.424242	0	0.32694	0.103805	0.48685	0.00195312	5	8	6	2	26	46	35	10	24.0451	1.78173	2.39344	2.43428	0.988869
NM_172706	9330182L06Rik	chr5	4	2	1	0.949495	0.857143	0.614865	0.810127	2.38076e-22	6.10828e-09	0.00647967	1.28765e-15	10	10	12	15	99	63	152	159	21.1187	4.9319	4.43061	9.04046	10.6984
NM_177205	9430015G10Rik	chr4	0	0	0	0.111111	NA	NA	NA	0.00131226	NA	NA	NA	1	0	0	0	18	NA	NA	NA	0.360959	0.998793	0.514182	0.433447	0.270889
NM_001081181	9430016H08Rik	chr1	4	0	1	0.3125	0.571429	0.75	0.333333	0.0501025	0.391603	0.0413895	0.237885	1	1	1	1	32	49	20	18	8.25032	22.8071	25.7867	15.9188	16.1666
NM_001081963	9430020K01Rik	chr18	4	0	0	0.61165	0.460581	0.493857	0.385802	0.000103085	0.246204	0.842862	6.66377e-09	30	33	39	37	315	246	412	655	28.443	5.698	7.95458	15.4179	21.5146
NM_026566	9430023L20Rik	chr15	4	0	0	0.537074	0.468354	0.607143	0.628141	0.106959	0.474106	0.00330173	0.000368082	11	10	10	9	502	162	200	202	22.2188	37.8403	19.1507	22.336	27.9522
NM_029886	9430038I01Rik	chr7	1	0	0	0.578947	0.8	1	0.666667	0.417692	0.375	0.25	0.507812	2	1	1	2	38	5	3	9	3.43714	12.4016	6.0742	5.75067	5.44018
NR_033568	9430041J12Rik	chr7	0	0	0	NA	0.307692	NA	NA	NA	0.266846	NA	NA	0	3	0	0	NA	13	NA	NA	2.99287	NA	1.25181	0.153328	0.0778573
NR_015606	9530009M10Rik	chr1	0	0	0	0	0.125	0	0	0.00390625	0.0703125	0.03125	0.25	1	1	1	1	9	8	6	3	9.85261	1.17117	2.21343	1.65679	1.00955
NM_001164655	9530053A07Rik	chr7	1	0	0	NA	0.444444	0.583333	0.6	NA	1	0.774414	0.753906	0	1	1	1	NA	9	12	10	0.348692	1.034	1.05554	2.62927	5.13589
NR_015610	9530059O14Rik	chr9	0	0	0	NA	NA	0.2	NA	NA	NA	0.375	NA	0	0	1	0	NA	NA	5	NA	1.69559	NA	NA	0.646073	0.0226252
NM_153117	9530068E07Rik	chr11	4	0	0	0.521505	0.659481	0.643389	0.670204	0.0024109	1.93656e-63	5.65987e-53	1.70755e-91	22	22	22	22	5089	2769	2860	3519	33.5165	194.549	127.027	139.311	187.631
NM_026739	9530077C05Rik	chr9	2	0	0	0.451852	0.666667	0.5	0.517241	0.301683	0.15159	1	1	17	6	7	8	138	25	22	29	5.83628	6.07534	2.04991	2.09541	3.50499
NR_033299	9530091C08Rik	chr9	0	0	0	NA	0.333333	NA	NA	NA	0.6875	NA	NA	0	2	0	0	NA	6	NA	NA	2.22325	0.608964	1.82415	0.888789	0.473878
NR_015539	9630013A20Rik	chr14	1	0	0	NA	NA	0.553191	NA	NA	NA	0.238287	NA	0	0	3	0	NA	NA	143	NA	4.42609	NA	0.156408	20.0868	0.0875516
NM_177003	9630033F20Rik	chr6	4	0	0	0.578313	0.665306	0.580071	0.518129	1.54028e-09	2.51654e-07	0.00855247	0.304899	43	33	38	42	1508	248	286	862	11.7584	24.1747	4.9971	8.3236	21.515
NM_001164663	9830001H06Rik	chr2	4	0	0	0.505089	0.458287	0.368694	0.489879	0.802853	0.000438482	6.2402e-34	0.685572	76	84	85	73	792	1820	2146	497	6.88608	7.34662	22.0427	29.0008	7.28486
NM_030728	9930013L23Rik	chr7	0	0	0	NA	0	NA	NA	NA	0.25	NA	NA	0	1	0	0	NA	3	NA	NA	2.26033	0.174704	0.870283	0.610508	0.607359
NR_030696	9930014A18Rik	chr15	1	0	1	0.4	0.75	0.625	0.3	0.503445	0.145996	0.454498	0.115318	3	2	2	3	20	12	17	20	0.544173	2.51093	2.60194	2.74734	6.47516
NM_172836	9930021J03Rik	chr19	4	0	0	0.565789	0.535433	0.493333	0.546392	0.0118495	0.286098	0.862527	0.127328	22	16	19	18	383	257	302	292	17.7666	13.479	12.9231	15.3835	16.9015
NM_177573	9930104L06Rik	chr4	0	0	0	0.525	0.55102	0.46875	0.785714	0.874629	0.568172	0.86005	0.057373	10	10	7	3	41	50	32	14	3.29079	2.01595	2.40471	2.22914	1.95792
NR_027827	A030009H04Rik	chr11	3	0	0	0.354839	0.5	0.333333	0.652174	0.0300159	1	0.6875	0.21004	2	2	2	2	64	13	6	23	138.929	10.8906	3.43447	3.6366	6.32399
NM_181048	A130010J15Rik	chr1	0	0	0	0.529412	NA	NA	1	1	NA	NA	0.0625	1	0	0	1	17	NA	NA	5	0.0613529	0.327794	0.084826	0.0467546	0.118706
NM_175313	A130022J15Rik	chr6	2	1	0	NA	0.490196	0.984127	NA	NA	1	1.38778e-17	NA	0	10	13	0	NA	51	64	NA	16.4372	0.387728	3.7375	3.98183	0.477395
NR_002860	A130040M12Rik	chr13	4	0	4	0.176591	0.175	0.262799	0.216117	1.19612e-49	2.38994e-17	2.00045e-16	8.1124e-22	18	15	18	17	492	163	307	275	45.2256	16.7246	9.23206	16.3659	13.3524
NM_172550	A130042E20Rik	chr10	0	0	0	0.413043	0.55	0.368421	0.529412	0.301996	0.823803	0.359283	0.864166	9	5	5	6	49	22	19	34	3.93477	2.14848	1.99118	2.2146	2.26898
NR_030676	A130049A11Rik	chr3	0	0	0	0.272727	NA	0.5	NA	0.226562	NA	1	NA	2	0	1	0	11	NA	4	NA	0.515189	0.612505	0.425252	0.25783	0.0952161
NM_001033375	A230046K03Rik	chr10	4	0	0	0.497959	0.539773	0.558528	0.608491	0.963974	0.32714	0.0490856	0.00192756	17	17	17	15	494	179	309	217	13.8072	21.2807	17.8134	24.1755	14.3347
NM_175687	A230050P20Rik	chr9	0	0	0	0.8	0.727273	NA	NA	0.375	0.226562	NA	NA	2	3	0	0	6	11	NA	NA	26.1196	0.671241	1.71965	0.842527	0.160433
NR_015495	A230056P14Rik	chr7	0	0	0	0.923913	0.761905	0.821429	0.903846	3.84741e-18	0.0266037	0.000912234	1.28482e-09	10	5	6	8	93	21	28	52	5.79403	2.49257	1.83103	1.45077	1.7296
NR_015533	A230057D06Rik	chr7	0	0	0	0.666667	0.830986	0.55	0.857143	1	1.34777e-08	0.823803	2.82888e-06	1	11	4	7	3	71	20	42	4.30881	0.225489	2.96863	1.85738	1.43717
NR_015600	A230072E10Rik	chrX	0	0	0	0	NA	NA	NA	0.25	NA	NA	NA	1	0	0	0	3	NA	NA	NA	2.22691	0.463554	0.366537	0.215497	0.410348
NM_145466	A2ld1	chr14	2	0	0	NA	0.55	0.514286	NA	NA	0.823803	0.904975	NA	0	4	7	0	NA	20	72	NA	22.2296	0.0523493	6.33315	24.4761	3.83701
NM_175628	A2m	chr6	2	0	0	0.326415	0.538462	NA	NA	9.72406e-16	0.571587	NA	NA	12	10	0	0	532	78	NA	NA	2.57063	27.7527	6.07558	NA	0.0770739
NM_172447	A330021E22Rik	chr5	0	0	0	0.8	0.625	NA	NA	0.375	0.726562	NA	NA	1	2	0	0	5	8	NA	NA	8.73552	0.382949	1.33783	0.873943	NA
NR_015566	A330023F24Rik	chr1	0	0	0	0	0.545455	0.111111	1	0.0625	1	0.0390625	0.25	1	3	2	1	5	11	9	3	33.7867	1.27238	1.30017	1.09201	0.866413
NR_015586	A330035P11Rik	chr14	0	0	0	NA	NA	0.666667	NA	NA	NA	1	NA	0	0	1	0	NA	NA	3	NA	0.418248	0.541722	1.00826	1.56913	0.82998
NR_029456	A330050B17Rik	chr3	0	0	0	NA	NA	0.5	NA	NA	NA	1	NA	0	0	1	0	NA	NA	4	NA	2.84139	0.0761423	0.0541859	0.238931	0.181988
NR_015599	A330076H08Rik	chr7	3	0	1	0.8	0.631579	0.194444	0.647059	0.109375	0.0286267	0.000312551	0.121449	3	9	4	5	10	77	39	34	7.99682	0.615304	5.38586	4.58563	3.48051
NM_175287	A430005L14Rik	chr4	4	0	0	0.408602	0.545455	0.361111	0.4	0.0965652	0.728332	0.132498	0.202639	2	2	2	2	95	35	36	52	4.54026	7.06706	3.52411	4.37047	6.0002
NM_183025	A430033K04Rik	chr5	4	0	1	0.551181	0.5	0.74	0.459016	0.286915	1	0.000936223	0.608921	13	7	11	8	127	38	50	61	9.87318	5.93253	3.17277	4.48476	4.75509
NM_001081351	A430107O13Rik	chr6	1	0	1	0	NA	0.701754	1	1.77636e-15	NA	0.00320154	2.38419e-07	8	0	11	5	50	NA	57	23	2.04785	2.58322	0.361099	4.03491	2.75632
NM_170757	A630007B06Rik	chr19	4	0	0	0.542254	0.556522	0.603175	0.589041	0.356	0.263054	0.0255434	0.159712	12	12	12	12	143	116	127	73	16.9543	8.59375	7.64821	15.1567	7.35319
NM_001110254	A630033E08Rik	chr17	0	0	0	NA	NA	0.666667	0.6	NA	NA	1	1	0	0	1	1	NA	NA	3	5	0.0313245	0.08694	0.037122	0.0954846	0.0831181
NM_001162932	A630055G03Rik	chr16	2	2	0	1	1	1	1	7.88861e-31	1.52588e-05	0.000488281	1.90735e-06	4	4	4	4	101	19	12	20	6.50054	7.20602	3.93476	2.34654	2.72007
NR_030699	A630072M18Rik	chr5	0	0	0	NA	0.7	0.595238	0.6	NA	0.115318	0.279956	0.607239	0	5	9	5	NA	20	42	15	2.12812	0.563805	1.0848	1.06479	0.815184
NR_015491	A630089N07Rik	chr16	4	0	1	0.656566	0.288889	0.3125	0.30303	0.00239463	0.00660882	0.0501025	0.035082	6	4	3	4	99	47	32	33	68.7889	8.29647	9.50692	8.56706	5.70174
NM_172505	A730008H23Rik	chr1	0	0	0	0	0	0	0	9.09495e-13	0.015625	0.00195312	0.015625	1	1	1	1	41	7	10	7	0.183595	1.37582	0.507674	0.439719	0.365371
NM_177394	A730011L01Rik	chr11	0	0	0	0.2	NA	0.666667	0.4	0.0118179	NA	1	1	1	0	1	1	20	NA	4	5	0.191422	0.382837	0.108977	0.223103	0.191718
NR_015523	A730017L22Rik	chr2	2	1	1	NA	0.73913	0.857143	NA	NA	0.0346897	0.0129395	NA	0	4	3	0	NA	23	14	NA	22.9284	2.04535	6.9054	4.58976	1.51584
NM_001007574	A830010M20Rik	chr5	0	0	0	0.64	0.775862	0.59434	0.285714	0.0202984	3.01159e-05	0.0644636	0.0356981	11	10	14	6	75	59	108	28	20.3119	1.17886	1.15426	2.17754	1.34552
NM_001033472	A830080D01Rik	chrX	2	2	0	0	0	1	0	5.96046e-08	2.38419e-07	0.015625	2.38419e-07	3	2	2	2	25	23	7	23	5.66615	2.95346	4.06029	3.13315	3.68996
NM_029870	A930001N09Rik	chr17	3	0	0	0.4	0.5	0.417127	0.512821	0.753906	1	0.00188881	1	3	7	11	6	10	34	366	40	19.4708	0.841474	4.51008	28.8314	5.16995
NR_028376	A930004D18Rik	chr2	0	0	0	NA	NA	1	0	NA	NA	0.25	0.03125	0	0	1	2	NA	NA	3	6	0.793818	0.368037	0.224494	0.467452	0.111701
NM_207277	A930005I04Rik	chr5	0	0	0	NA	0.6	NA	NA	NA	1	NA	NA	0	1	0	0	NA	5	NA	NA	0.957669	0.465146	0.748385	0.729802	0.64449
NR_026853	A930012L18Rik	chr18	0	0	0	0.666667	NA	NA	NA	0.6875	NA	NA	NA	2	0	0	0	6	NA	NA	NA	0.983878	0.167257	0.238053	NA	0.266506
NR_027886	A930013F10Rik	chr8	0	0	0	1	0.733333	0.769231	NA	0.5	0.118469	0.0922852	NA	1	4	4	0	4	15	13	NA	6.54605	0.535733	0.895106	0.913643	0.185573
NR_015618	A930015D03Rik	chr17	2	0	2	0.269231	0	0.2	0.375	0.0289593	0.0625	0.0351562	0.726562	2	1	3	2	26	5	15	8	12.3354	7.84709	4.22596	10.9809	5.63223
NR_033609	A930017M01Rik	chr15	0	0	0	0.666667	NA	NA	NA	1	NA	NA	NA	1	0	0	0	3	NA	NA	NA	16.9975	0.451565	0.111774	NA	0.156418
NR_033305	AA388235	chr17	0	0	0	0.586207	1	1	NA	0.458258	4.76837e-07	0.000488281	NA	6	6	3	0	29	22	12	NA	6.53348	0.671918	1.18501	0.6417	0.535317
NM_145415	AA408296	chr1	3	0	1	0.387097	0.551724	0.705882	0.578947	0.0979544	0.511842	0.00460131	0.647606	9	9	8	4	63	58	52	19	3.57918	4.59169	6.30341	4.7762	2.25494
NM_001004178	AA415398	chr4	0	0	0	NA	0.692308	1	0.6	NA	0.0755187	0.0078125	1	0	4	1	1	NA	26	8	5	1.95967	0.65438	2.45542	1.72673	1.46924
NR_028363	AA465934	chr11	0	0	0	0.111111	0.555556	0.666667	0.75	0.0390625	1	0.6875	0.625	1	1	1	1	9	9	6	4	9.1417	5.82319	4.76561	3.19775	2.7836
NM_181066	AA881470	chr5	0	0	0	0.714286	NA	0.428571	0.684211	0.0783539	NA	0.790527	0.167068	2	0	2	2	21	NA	14	19	0.204119	0.258631	0.0981609	0.324628	0.357155
NM_133954	AA960436	chr8	4	0	0	0.520913	0.404494	0.38806	0.478873	0.537562	0.0893207	0.0864372	0.674935	7	6	7	7	266	90	68	144	8.521	36.6319	19.5971	13.5146	28.2663
NM_177604	AA986860	chr1	0	0	0	0.375	0	0.545455	0.416667	0.726562	0.25	1	0.774414	2	1	3	3	8	3	11	12	1.30926	1.18446	1.2989	1.76698	2.28952
NM_153416	Aaas	chr15	4	0	0	0.603627	0.59375	0.507812	0.578125	5.47502e-05	0.0416383	0.929614	0.0360834	5	5	5	5	389	130	130	199	8.00484	74.3075	46.129	31.8185	79.7439
NM_030210	Aacs	chr5	4	0	0	0.555445	0.528497	0.648649	0.538244	0.000501431	0.471732	3.52637e-07	0.166316	17	14	15	17	1011	196	298	355	18.2981	58.2651	16.2663	22.7075	29.5566
NM_025857	Aagab	chr9	4	0	0	0.421603	0.5	0.468421	0.515924	0.00927883	1	0.424932	0.749665	10	9	10	10	287	94	195	159	31.679	25.7224	16.6663	27.9163	25.4432
NM_001040106	Aak1	chr6	0	0	0	0.364865	0.553571	0.396226	0.290323	0.0265168	0.298593	0.168978	0.0294494	3	3	3	3	74	115	53	32	1.00995	0.388343	0.802068	0.398564	0.297761
NM_146110	Aamp	chr1	4	0	1	0.246285	0.598361	0.575758	0.4	3.16521e-29	0.0368775	0.0978122	0.0124956	2	2	2	2	472	127	135	167	73.3197	226.785	99.4977	123.706	145.258
NM_175503	Aard	chr15	4	1	2	0.727189	0.796364	0.0103627	0.686308	2.92509e-52	6.03307e-24	2.98259e-54	1.96606e-19	11	11	11	11	1093	276	194	580	3.47244	61.1361	18.846	15.9759	48.9408
NM_198608	Aars2	chr17	4	0	0	0.494331	0.541667	0.331606	0.542683	0.848963	0.315875	3.33968e-06	0.310039	22	21	22	19	450	170	195	165	8.21249	15.1121	7.70571	11.7759	10.5348
NM_144829	Aarsd1	chr11	4	0	1	0.282435	0.581818	0.462617	0.442105	2.27882e-44	0.00785593	0.305176	0.127413	9	9	9	9	1016	279	217	192	25.0168	73.8584	29.733	27.7239	23.6992
NM_173765	Aasdh	chr5	4	0	0	0.486381	0.542373	0.48855	0.57931	0.708282	0.292637	0.861369	0.0673295	33	28	23	25	259	180	132	145	7.15028	5.70663	5.98816	4.96886	4.89995
NM_026276	Aasdhppt	chr9	4	0	0	0.459459	0.636364	0.351351	0.413793	0.742829	0.548828	0.0988717	0.458258	1	2	2	3	37	11	37	29	10.6367	6.73095	5.37826	11.8267	8.59262
NM_013930	Aass	chr6	0	0	0	0.0333333	NA	0.166667	0	5.7742e-08	NA	0.21875	0.25	5	0	2	1	30	NA	6	3	3.2915	2.22826	0.238944	1.48464	0.656601
NM_019816	Aatf	chr11	4	0	0	0.3125	0.328571	0.453947	0.363636	1.30989e-17	6.10603e-05	0.291654	0.0580641	13	12	12	9	517	144	154	57	8.33443	30.3136	11.0318	14.9183	6.70022
NM_007377	Aatk	chr11	4	0	1	0.260638	0.49162	0.595989	0.466667	4.5338e-21	0.881223	0.000396036	0.436368	13	13	13	12	379	180	352	166	44.2323	24.9612	18.5889	34.6303	16.9943
NM_172961	Abat	chr16	3	0	0	0.5	0.517241	0.514286	0.61194	1	0.895683	1	0.0864372	1	3	3	1	8	60	36	69	8.28343	0.58521	4.68516	3.02234	4.66236
NM_013454	Abca1	chr4	3	0	0	0.46875	0.539873	0.43609	0.509031	0.86005	7.92039e-06	4.32436e-10	0.454075	9	40	40	40	33	3196	2419	1836	8.95444	0.963437	72.9656	66.1738	50.8789
NM_007379	Abca2	chr2	4	0	0	0.45	0.38191	0.465217	0.597403	0.518958	0.00105937	0.322633	0.110016	9	13	13	11	61	202	236	78	37.3438	5.01714	22.9483	26.1989	10.1045
NM_007378	Abca4	chr3	0	0	0	NA	NA	0	NA	NA	NA	0.25	NA	0	0	1	0	NA	NA	3	NA	0.232653	0.14807	0.12201	0.158955	0.124176
NM_147219	Abca5	chr11	1	0	0	0.193939	0.533333	0.573604	1	7.75804e-16	0.698883	0.0457767	7.45058e-09	31	15	35	8	166	61	199	28	15.618	2.04928	1.86668	5.11227	1.0449
NM_013850	Abca7	chr10	2	0	0	0.506667	0.681818	0.596154	0.481481	1	0.133801	0.211609	1	12	5	11	7	77	22	52	29	2.16487	3.79479	2.18236	4.52928	2.87999
NM_153145	Abca8a	chr11	0	0	0	NA	NA	1	NA	NA	NA	0.125	NA	0	0	1	0	NA	NA	4	NA	1.70899	0.0301843	0.358006	0.473584	0.192383
NM_013851	Abca8b	chr11	1	0	0	0.515901	0.717949	0.753968	0.64	0.634472	0.0094753	9.61025e-09	0.0202984	38	10	26	14	286	39	129	76	11.4073	4.40688	1.04103	2.96941	2.47661
NM_147220	Abca9	chr11	1	0	1	0.730263	0.884615	0.9	0.928571	1.21622e-08	8.79765e-05	0.0214844	0.00183105	24	8	3	4	154	26	10	14	3.59477	3.32529	1.01326	0.438309	1.39284
NM_019552	Abcb10	chr8	4	0	0	0.473988	0.552511	0.652997	0.487395	0.360775	0.136934	5.53923e-08	0.85463	33	26	31	19	349	226	319	120	9.14204	7.6214	6.03047	9.44684	5.53897
NM_008830	Abcb4	chr5	0	0	0	1	0.777778	1	1	0.25	0.179688	0.25	0.25	1	3	1	1	3	9	3	3	2.80391	0.277227	0.493214	1.00041	0.552166
NM_023732	Abcb6	chr1	4	0	1	0.244514	0.501961	0.415205	0.396226	9.82612e-97	1	0.031954	0.0109246	13	12	12	12	1611	256	174	162	14.1353	83.7548	19.8175	16.1957	14.5146
NM_009592	Abcb7	chrX	4	4	0	0	0	1	0	7.52316e-37	4.33681e-19	4.93038e-32	4.1359e-25	7	7	10	10	122	62	107	82	14.8574	11.1616	8.96211	14.2653	12.2057
NM_029020	Abcb8	chr5	4	0	0	0.504032	0.430605	0.443114	0.521739	0.949385	0.0232265	0.163459	0.605943	9	9	9	9	252	285	171	188	30.2405	23.9965	28.0285	26.587	22.5926
NM_019875	Abcb9	chr5	1	0	0	0.654867	0.428571	NA	0.5	0.00127763	0.790527	NA	1	11	4	0	4	113	14	NA	14	9.20867	4.79461	2.02552	0.983522	1.61973
NM_008576	Abcc1	chr16	4	0	0	0.546667	0.511628	0.520548	0.471831	0.0789918	0.860311	0.519823	0.557071	23	21	23	22	376	131	299	143	9.0619	12.3278	7.70175	14.3196	8.03029
NM_013790	Abcc5	chr16	4	0	0	0.521825	0.535593	0.547794	0.468439	0.349585	0.244197	0.129406	0.299492	14	14	14	14	509	297	276	305	39.412	20.5718	16.4662	16.3366	19.7976
NM_176839	Abcc5	chr16	1	0	1	0.2	0.772727	0.5	NA	0.375	0.0169005	1	NA	1	1	1	0	5	22	4	NA	14.8335	5.33148	18.3894	7.68672	7.80638
NM_007435	Abcd1	chrX	4	4	0	0	0.0243902	1	0.0555556	1.86265e-09	3.81988e-11	1.90735e-06	0.000144958	4	4	4	3	30	42	21	18	6.27463	4.33477	8.84072	4.82073	4.81639
NM_011994	Abcd2	chr15	0	0	0	1	0.583333	NA	0.333333	0.25	0.541256	NA	1	1	6	0	1	3	24	NA	3	19.2337	0.224308	1.05934	0.15997	1.34842
NM_008991	Abcd3	chr3	4	0	0	0.479638	0.532319	0.506329	0.445736	0.590582	0.323843	0.89667	0.0925806	10	11	11	11	222	266	240	260	14.5154	15.1225	23.7468	29.6975	28.3858
NM_008992	Abcd4	chr12	4	0	0	0.535714	0.526316	0.461538	0.648649	0.68888	0.871415	0.845019	0.0988717	4	4	4	4	56	38	26	37	4.1435	8.43025	9.29335	8.98162	10.9386
NM_015751	Abce1	chr8	4	0	0	0.592079	0.547315	0.531856	0.583333	7.93941e-13	0.00899887	0.0939194	8.80776e-06	12	12	11	11	1529	796	736	726	51.8262	80.0833	58.2976	70.1688	63.4954
NM_013854	Abcf1	chr17	4	0	0	0.523622	0.491166	0.34981	0.537037	0.490143	0.812107	1.26906e-06	0.500766	6	6	6	6	258	286	266	109	34.9252	37.3876	58.8789	66.5097	26.2294
NM_013853	Abcf2	chr5	4	0	0	0.537723	0.548961	0.553797	0.505917	0.0454261	0.0811536	0.0632264	0.870409	5	5	5	5	735	338	320	340	58.2181	110.239	61.1529	73.7147	82.323
NM_013852	Abcf3	chr16	4	0	0	0.5	0.408759	0.565657	0.488235	1	0.0399282	0.227626	0.818106	5	6	4	5	223	141	101	171	35.8468	32.417	21.2721	23.7191	35.4756
NM_011920	Abcg2	chr6	4	0	1	0.519553	0.296296	0.536585	0.48913	0.653942	0.052239	0.470851	0.917041	4	4	4	3	181	28	129	94	11.9749	33.4919	7.93933	34.012	29.6999
NM_138955	Abcg4	chr9	1	0	1	NA	0.711111	0.5	NA	NA	0.00660882	1	NA	0	6	2	0	NA	45	8	NA	14.3444	0.218088	5.34333	1.14873	0.347502
NM_145215	Abhd11	chr5	4	0	1	0.529046	0.552529	0.737288	0.538462	0.218725	0.104655	2.48208e-07	0.252031	6	6	6	6	487	260	119	250	21.9615	28.66	25.3932	11.9713	23.5895
NM_024465	Abhd12	chr2	4	0	0	0.507143	0.550136	0.487179	0.435514	0.807286	0.060772	0.452202	0.00324611	8	8	8	8	424	374	951	541	185.852	35.1774	42.1383	113.133	66.3927
NM_001081119	Abhd13	chr8	4	0	0	0.51107	0.521912	0.503268	0.486076	0.636617	0.527997	0.954425	0.614912	23	18	21	22	548	251	308	396	17.3708	23.0705	15.4829	18.6401	26.5059
NM_018811	Abhd2	chr7	4	0	0	0.382667	0.440828	0.495631	0.391069	1.37218e-10	0.00235356	0.778087	3.45425e-09	12	12	12	12	752	685	1283	742	24.1162	38.3506	57.7129	126.814	55.4962
NM_134130	Abhd3	chr18	2	0	1	0	0.48	0.266055	0	0.25	1	1.08091e-06	0.015625	1	2	2	2	3	25	111	7	62.2763	0.598674	11.6735	42.9732	3.10026
NM_026179	Abhd5	chr9	4	0	0	0.518519	0.551724	0.481481	0.608	0.772989	0.511842	0.824313	0.0196774	7	7	5	7	109	60	83	126	10.7133	19.1274	12.6669	21.3113	36.9104
NM_025341	Abhd6	chr14	4	0	1	0.462585	0.4875	0.712121	0.503597	0.40958	0.911072	0.000756107	1	5	5	5	5	147	80	67	140	32.0559	19.6214	15.1386	13.7898	28.1873
NM_022419	Abhd8	chr8	3	0	1	0.578313	0.472222	0.142857	0.727273	0.18746	0.867939	0.125	0.226562	3	3	2	3	89	40	8	11	102.131	30.9031	25.1509	5.84869	3.99006
NM_001077192	Abi1	chr2	0	0	0	0.612245	0.393939	0.533333	0.378378	0.152408	0.108857	0.855536	0.187742	2	2	2	2	51	68	31	39	3.23325	1.5621	2.24696	1.14723	2.46257
NM_198127	Abi2	chr1	4	0	1	0.253659	0.456989	0.541176	0.38	9.80188e-13	0.271352	0.515426	0.0209787	3	3	3	3	208	187	86	100	61.466	59.9514	59.292	34.092	43.1737
NM_001112703	Abl1	chr2	0	0	0	0.666667	0.6	0.75	0.5	1	0.753906	0.625	1	1	1	1	1	3	10	4	4	1.38149	1.38633	2.06491	1.88426	1.5283
NM_009595	Abl2	chr1	0	0	0	0.25	NA	NA	NA	0.625	NA	NA	NA	1	0	0	0	4	NA	NA	NA	0.227943	0.532479	0.225109	0.264695	0.210013
NM_001103178	Ablim1	chr19	0	0	0	0.4	0.333333	0	0	1	0.6875	0.00195312	0.00195312	1	1	1	1	6	6	10	10	0.462423	0.105133	0.312869	0.239928	0.380723
NM_001177698	Ablim2	chr5	0	0	0	NA	1	0.5	NA	NA	0.015625	1	NA	0	2	1	0	NA	7	3	NA	0.0409603	NA	0.158568	0.0749141	0.0253601
NM_013924	Abt1	chr13	4	1	2	0.232804	0.30742	0.0673575	0.215	2.72077e-26	8.0171e-11	9.39572e-39	1.89551e-16	15	14	13	12	378	284	194	201	14.1323	11.7381	8.31722	7.61731	7.85709
NM_030251	Abtb1	chr6	4	0	0	0.547945	0.594286	0.647619	0.586207	0.281937	0.0153242	0.00322099	0.0772623	13	14	13	13	147	178	108	118	16.7637	9.28396	12.615	8.81519	10.3408
NM_178890	Abtb2	chr2	4	0	0	0.570432	0.673077	0.54591	0.619718	0.000183854	6.66617e-07	0.0272742	0.000580367	16	16	16	16	727	209	608	214	3.45081	24.3512	11.9585	37.662	13.3287
NM_130864	Acaa1a	chr9	3	1	2	0.712871	0.756757	0.992806	NA	1.26014e-09	1.46058e-21	4.0178e-40	NA	10	10	10	0	205	338	139	NA	6.96245	12.9806	31.4167	15.0226	0.255981
NM_146230	Acaa1b	chr9	0	0	0	NA	NA	1	1	NA	NA	0.25	0.5	0	0	1	1	NA	NA	4	3	1.20196	1.3199	1.63774	1.27439	0.593189
NM_177470	Acaa2	chr18	4	0	0	0.590998	0.472467	0.482328	0.438799	4.4979e-05	0.103871	0.28734	0.000354138	10	10	10	10	517	919	974	873	25.1196	35.9244	120.269	104.753	105.304
NM_133360	Acaca	chr11	4	0	0	0.324726	0.601737	0.555061	0.494723	1.33003e-36	8.37705e-09	0.00107005	0.799322	39	39	39	39	1287	816	910	767	24.4608	22.8516	18.4162	25.7373	22.9392
NM_028037	Acad10	chr5	4	0	3	0.217391	0.25	0.181818	0.6	0.010622	7.73308e-05	0.0654297	0.503445	3	3	2	3	23	64	11	20	2.42481	4.04021	12.0335	4.77259	8.5007
NM_175324	Acad11	chr9	4	0	0	0.450935	0.339286	0.45245	0.44	0.0473739	1.17999e-15	0.085677	0.0186615	22	23	22	21	434	620	352	403	12.5048	15.3697	29.7515	19.1911	22.7696
NM_025862	Acad8	chr9	4	0	0	0.50348	0.528384	0.434066	0.571429	0.923268	0.427852	0.08794	0.0535063	12	10	11	9	436	229	185	196	11.4689	22.1242	15.7866	14.0893	18.8371
NM_172678	Acad9	chr3	4	0	0	0.528967	0.544601	0.563025	0.541284	0.269507	0.217356	0.0599088	0.150379	10	10	10	10	399	217	243	328	33.3979	21.9271	22.1068	19.5456	31.9714
NM_007382	Acadm	chr3	4	0	0	0.60884	0.67475	0.655012	0.646822	6.12898e-11	1.25473e-20	1.32894e-10	2.48271e-25	11	11	11	11	913	711	434	1254	28.1754	73.7825	74.5985	58.6979	145.615
NM_007383	Acads	chr5	4	1	0	0.496718	0.590214	0.561947	0.938596	0.925475	0.00130406	0.0722576	3.88233e-47	4	4	4	4	459	329	227	230	4.89044	59.5598	64.3325	46.169	44.0461
NM_025826	Acadsb	chr7	4	0	0	0.553968	0.602094	0.598733	0.543462	0.00755097	2.9947e-10	1.33311e-09	0.00171308	19	19	19	20	635	965	957	1330	33.4689	15.3574	32.5947	34.2101	52.8401
NM_017366	Acadvl	chr11	4	0	0	0.378378	0.44	0.5	0.461538	0.0132336	0.271253	1	0.571587	1	1	1	1	111	101	18	78	33.8967	112.315	84.529	76.3031	147.183
NM_007424	Acan	chr7	1	0	0	NA	NA	0.696629	NA	NA	NA	0.000265585	NA	0	0	1	0	NA	NA	89	NA	0.553406	0.0998374	0.087444	36.1	0.012237
NM_030138	Acap2	chr16	4	0	0	0.523674	0.605214	0.556818	0.555651	0.131549	1.23339e-06	0.00154824	0.000167621	27	25	26	28	1063	544	806	1171	30.4841	21.8267	15.8237	31.5703	36.6776
NM_144784	Acat1	chr9	4	0	0	0.699451	0.605183	0.599	0.635549	4.56793e-73	2.53826e-14	4.11517e-10	2.03349e-32	10	9	9	9	2020	1325	1023	1911	37.6759	87.0467	80.3223	67.3411	135.285
NM_009338	Acat2	chr17	4	0	1	0.424759	0.306122	0.286096	0.364444	3.59244e-08	2.48702e-11	6.68554e-17	5.7507e-05	7	7	7	7	1355	298	376	227	23.5838	94.1687	26.7205	53.9595	23.758
NM_153151	Acat3	chr17	0	0	0	0	0	0	NA	0.00195312	0.25	0.125	NA	1	1	1	0	10	3	4	NA	1.94213	0.425552	0.807572	0.489632	0.361639
NM_133225	Acbd3	chr1	4	0	1	0.220472	0.534483	0.56701	0.408602	8.93709e-20	0.694004	0.222878	0.0965652	3	3	3	3	256	60	100	93	21.0134	56.3872	25.2997	44.516	34.5746
NM_025988	Acbd4	chr11	2	0	1	0.269231	0.482759	NA	0.588235	1.38464e-07	1	NA	0.629059	7	6	0	3	135	30	NA	19	9.45312	9.5774	5.07302	1.15262	2.60124
NM_009597	Accn2	chr15	4	0	0	0.470852	0.553134	0.6	0.551181	0.421702	0.0471545	0.0353237	0.286915	17	17	16	16	225	373	122	127	27.7064	9.12402	19.6926	8.24074	8.65598
NM_183220	Accs	chr2	4	0	1	0.472222	0.5625	0.444444	0.714286	0.867939	0.596615	0.814529	0.179565	2	2	2	2	37	33	19	14	0.916735	7.9158	9.8581	5.67757	4.72989
NM_207624	Ace	chr11	0	0	0	NA	NA	0.454545	NA	NA	NA	1	NA	0	0	3	0	NA	NA	11	NA	3.8745	0.0115629	0.0987437	0.925238	0.0736975
NM_025408	Acer3	chr7	4	0	0	0.538462	0.569106	0.378788	0.539823	0.529602	0.148816	0.0640175	0.451853	15	14	9	13	93	123	68	114	5.49518	4.03663	10.2622	6.33336	11.6662
NM_134037	Acly	chr11	4	0	0	0.458081	0.567185	0.5501	0.654667	9.76743e-06	0.000400043	0.00171207	1.84703e-17	11	11	11	11	2830	716	1013	760	55.3847	208.523	77.1174	103.958	89.6257
NM_007386	Aco1	chr4	4	0	0	0.477108	0.575182	0.548866	0.515497	0.0235221	2.87971e-08	0.00103347	0.227348	27	27	26	26	2507	1384	1160	1592	18.5993	52.8099	44.6363	42.783	61.2454
NM_080633	Aco2	chr15	4	0	0	0.537971	0.541646	0.509104	0.538217	0.00286229	0.000207907	0.517192	0.000980772	6	6	6	6	1593	2041	1392	1907	225.1	218.246	535.455	242.53	542.879
NM_012006	Acot1	chr12	4	0	0	0.694444	0.512894	0.698113	0.627907	0.0288167	0.668545	0.00548634	0.126289	3	3	3	1	36	350	55	43	4.66521	19.4688	128.382	36.9169	36.8562
NM_025590	Acot11	chr4	2	1	0	0.482866	0.711111	NA	0.902685	0.576814	7.65707e-05	NA	6.87741e-50	38	18	0	38	325	90	NA	300	9.24323	5.51097	2.49635	0.32835	7.0821
NM_025790	Acot13	chr13	4	0	0	0.646075	0.53222	0.63807	0.58567	3.19344e-16	0.203964	1.07255e-07	1.61956e-05	7	7	7	7	782	422	379	648	70.6921	83.2453	108.168	78.5466	117.161
NM_134188	Acot2	chr12	3	0	0	0.576923	0.683544	0.409091	0.65	0.557197	0.00146607	0.291215	0.0806905	3	3	3	3	26	81	45	41	3.27012	2.08346	10.5434	6.6185	5.90184
NM_172580	Acot6	chr12	0	0	0	NA	NA	NA	0	NA	NA	NA	0.125	0	0	0	1	NA	NA	NA	4	1.53187	NA	0.132372	1.0701	0.889163
NM_133348	Acot7	chr4	0	0	0	0.857143	NA	0.851852	0.666667	0.000179991	NA	0.000310749	0.6875	2	0	2	1	29	NA	27	6	5.99777	1.51333	0.215389	2.19629	0.54255
NM_133240	Acot8	chr2	3	0	1	0.25	0.333333	0.428571	0.636364	0.145996	0.387695	1	0.548828	2	1	1	2	12	12	7	11	10.2642	5.35379	9.99679	7.55225	5.55671
NM_019736	Acot9	chrX	4	4	0	0	0	1	0.0178571	1.12104e-44	5.96046e-08	1.81899e-12	1.58207e-15	6	4	5	6	149	26	41	57	13.9546	17.6607	5.1934	7.04178	13.1981
NM_015729	Acox1	chr11	4	0	0	0.402918	0.561651	0.625924	0.580069	7.47851e-09	4.24101e-08	3.14347e-26	1.09577e-09	22	22	22	22	897	1999	1772	1460	66.2414	37.1749	98.1381	111.051	95.1725
NM_030721	Acox3	chr5	4	0	0	0.529851	0.542169	0.518325	0.420168	0.545534	0.312974	0.664296	0.0162889	19	24	26	26	136	167	194	239	9.6275	3.8123	7.86461	8.51286	9.44167
NM_007387	Acp2	chr2	4	0	0	0.497006	0.410596	0.555556	0.491228	1	0.0340105	0.101991	0.8785	10	10	10	10	169	153	238	172	32.1172	14.7162	21.4464	29.7189	25.8285
NM_019800	Acp6	chr3	4	0	0	0.395	0.565445	0.495413	0.448276	0.00363495	0.0821913	1	0.391191	6	6	6	6	202	194	109	88	5.69551	21.9378	22.2044	14.8883	15.4789
NM_153420	Acpl2	chr9	4	0	0	0.564912	0.633333	0.511521	0.621212	0.0327873	0.200488	0.665781	0.0640175	14	5	14	10	286	30	441	67	10.7442	13.6143	3.81355	35.9606	6.83677
NM_053178	Acsbg1	chr9	4	0	0	0.625625	0.608663	0.615917	0.572396	6.90025e-24	3.14702e-29	9.68259e-05	7.23116e-07	11	11	11	11	1620	2696	291	1193	53.9773	120.46	273.802	32.0002	145.01
NM_153807	Acsf2	chr11	4	0	1	0.56	0.5625	0.59322	0.731707	0.271253	0.00610684	0.192526	0.004324	11	15	11	6	102	505	59	41	5.14401	3.62578	27.1385	3.52299	3.4312
NM_144932	Acsf3	chr8	4	0	2	0.772727	0.681818	0.754386	0.319149	1.00961e-05	0.00427241	0.000153889	0.0186238	7	8	7	7	67	67	57	48	7.19265	4.78599	8.63314	7.75002	6.23945
NM_007981	Acsl1	chr8	4	0	1	0.591623	0.36	0.729858	0.553191	0.013677	0.229523	1.70089e-11	0.560065	12	5	12	8	192	25	214	47	29.3052	11.5118	3.01658	21.4555	6.12973
NM_028817	Acsl3	chr1	0	0	0	0.2	0.466667	0.333333	0.388889	0.000182166	1	0.189247	0.480682	1	1	1	1	40	15	23	18	0.684691	0.901127	0.692173	0.942563	0.478618
NM_207625	Acsl4	chrX	0	0	0	0	NA	NA	NA	0.015625	NA	NA	NA	2	0	0	0	7	NA	NA	NA	2.88533	0.224656	0.0152261	0.100708	0.102276
NM_027976	Acsl5	chr19	4	1	0	0.0104987	0.661017	0.536585	0.486239	3.54681e-106	0.0183371	0.27839	0.848195	13	8	12	11	383	59	247	109	29.1013	22.3	6.30189	20.4753	11.5967
NM_080575	Acss1	chr2	3	3	0	NA	0.910256	0.980456	0.991228	NA	3.53292e-41	8.66277e-81	1.10741e-32	0	28	26	22	NA	238	310	115	15.0788	0.471493	6.84488	12.2061	5.80988
NM_001142804	Acss3	chr10	0	0	0	0.133333	0	NA	NA	0.00738525	0.015625	NA	NA	2	2	0	0	15	7	NA	NA	0.696455	2.78578	2.8321	1.04067	NA
NM_007392	Acta2	chr19	2	0	2	NA	0.25	0.272727	NA	NA	0.000234446	1.53615e-08	NA	0	8	8	0	NA	57	158	NA	8.19941	0.158665	5.01332	19.3179	0.202254
NM_007393	Actb	chr5	4	0	0	0.657459	0.590278	0.617524	0.685083	1.78385e-17	1.43562e-06	3.10017e-10	1.01515e-23	2	2	2	2	730	730	730	730	857.155	1004.98	2781.48	2483	1131.02
NM_009609	Actg1	chr11	4	0	0	0.417423	0.591978	0.594183	0.599462	0.000121961	8.55053e-07	4.69394e-07	0.000146853	2	2	2	2	559	730	730	372	323.171	269.213	1371.19	601.038	233.799
NM_019673	Actl6a	chr3	4	0	0	0.531148	0.47619	0.454106	0.563291	0.134045	0.56074	0.2108	0.130386	5	5	5	5	620	192	209	160	6.8808	53.8457	24.9062	28.4459	22.6722
NM_134156	Actn1	chr12	3	0	0	0.626667	0.5875	0.580645	0.69697	0.0369549	0.145635	0.0331912	0.035082	11	12	15	8	76	80	192	33	18.7057	3.77775	4.495	13.5377	2.67264
NM_021895	Actn4	chr7	4	0	0	0.566058	0.49298	0.525886	0.544872	6.23368e-05	0.752045	0.171993	0.0579466	10	10	10	10	937	651	741	473	42.7369	51.6679	59.6994	74.438	44.234
NM_019785	Actr10	chr12	4	0	0	0.382463	0.383367	0.392857	0.385174	1.34732e-14	2.51274e-07	4.48459e-07	1.84035e-09	23	24	24	21	1081	500	572	692	45.2778	32.0442	23.324	29.7028	35.6742
NM_016860	Actr1a	chr19	4	0	0	0.558713	0.550427	0.517811	0.55481	1.00317e-08	0.000619016	0.238376	3.9127e-06	14	14	14	14	2413	1197	1170	1810	112.159	135.877	104.025	116.872	159.393
NM_146107	Actr1b	chr1	4	0	1	0.285348	0.414907	0.483842	0.389513	5.5976e-131	1.55225e-06	0.294341	5.20472e-13	13	13	13	13	3147	813	1132	1082	165.469	176.308	68.9366	98.9919	94.6397
NM_146243	Actr2	chr11	4	0	0	0.500182	0.658425	0.609987	0.613963	1	6.31869e-26	1.96391e-18	6.71982e-24	27	26	27	27	2763	1109	1606	1955	109.135	85.7517	54.5678	77.0953	90.9357
NM_023735	Actr3	chr1	4	0	0	0.321555	0.314286	0.571429	0.386364	1.88545e-09	0.000178357	0.063568	0.0113146	5	5	5	5	285	108	184	134	82.9664	119.141	91.3566	112.369	104.501
NM_001004365	Actr3b	chr5	4	0	1	0.523256	0.341463	0.3	0.404762	0.746534	0.0595839	0.115318	0.101136	4	4	3	4	89	42	21	84	59.1667	9.87083	8.83345	3.72933	12.7298
NM_175419	Actr5	chr2	2	0	1	0.241379	0.604651	0.625	0.117647	0.000100497	0.222053	0.726562	0.00234985	10	8	2	4	59	43	8	18	3.80391	5.84573	4.12623	3.09455	2.72622
NM_025914	Actr6	chr10	4	0	0	0.588679	0.56701	0.661538	0.508876	0.00462534	0.222878	0.0125025	0.87779	6	6	7	6	265	98	67	170	15.1429	15.6221	9.06378	7.85797	13.6881
NM_027493	Actr8	chr14	4	0	0	0.405797	0.52381	0.648649	0.534884	0.148032	1	0.0988717	0.760792	2	2	2	2	70	21	38	43	34.5155	27.9096	15.6542	26.7834	29.0675
NM_007395	Acvr1b	chr15	4	0	0	0.495575	0.492063	0.578125	0.59322	1	1	0.260435	0.192526	9	8	9	7	113	64	64	60	38.3892	7.06708	7.72781	8.89749	7.58036
NM_007396	Acvr2a	chr2	4	0	1	0.166667	0.451613	0.540984	0.375	0.00154388	0.7201	0.608921	0.215327	4	4	6	6	24	31	62	32	18.004	3.77826	5.44827	7.65958	7.12927
NM_007397	Acvr2b	chr9	0	0	0	0.666667	0.2	0.666667	NA	0.6875	0.375	1	NA	2	1	1	0	6	5	3	NA	2.63218	1.16224	2.93029	2.86554	0.423295
NM_027857	Acy3	chr19	3	0	2	0.285714	0.152174	NA	0.384615	0.0783539	1.83154e-06	NA	0.581055	2	2	0	2	21	46	NA	13	3.5399	5.03591	18.0258	2.94821	5.26964
NM_025421	Acyp1	chr12	4	1	1	0.543478	0.318182	0.928571	0.842105	0.658738	0.133801	0.00183105	0.00442505	2	2	2	2	46	22	14	20	33.0219	71.4778	23.4482	33.5073	42.0847
NM_007398	Ada	chr2	2	0	0	0.634146	1	0.615385	0	0.0198269	0.03125	0.32694	0.25	5	2	5	1	84	6	28	3	1.35891	5.66239	1.18662	4.30581	1.32846
NM_007399	Adam10	chr9	4	0	0	0.410633	0.431718	0.432381	0.401376	1.19657e-07	0.00414805	0.0022199	6.28285e-09	6	6	6	6	889	459	532	877	34.7692	66.3935	53.7302	57.1253	103.81
NM_009613	Adam11	chr11	0	0	0	0	0	0	0	8.07794e-28	1.81899e-12	5.96046e-08	1.86265e-09	2	2	2	2	91	40	25	30	0.698521	0.721344	0.609044	0.402833	0.467548
NM_007400	Adam12	chr7	4	0	0	0.501298	0.510797	0.575935	0.508591	0.871466	0.298663	1.00029e-05	0.529241	17	17	17	17	4656	2438	864	1463	1.67077	138.327	89.5918	36.8513	56.9292
NM_001037722	Adam15	chr3	0	0	0	0.95	0.894737	0.75	0.947368	4.00543e-05	0.000728607	0.625	7.62939e-05	1	1	1	1	21	20	4	19	0.904598	1.64409	2.93172	0.533697	2.25836
NM_009615	Adam17	chr12	4	0	0	0.504587	0.684211	0.526316	0.65625	1	0.0335524	0.731009	0.0168582	1	1	1	1	111	39	76	66	9.57912	51.2591	36.8608	53.2142	56.1039
NM_009616	Adam19	chr11	4	0	2	0.569322	0.794118	0.578947	0.775	0.0123628	0.000821395	0.647606	0.000679548	6	4	3	5	341	35	20	41	5.49426	53.5311	8.7858	5.10621	11.3015
NM_172126	Adam1a	chr5	0	0	0	NA	1	0.333333	NA	NA	0.25	1	NA	0	1	1	0	NA	3	3	NA	3.58248	0.548043	1.27403	1.2898	0.553059
NM_001098225	Adam22	chr5	2	0	0	0.548387	0.663366	0.668449	0.596154	0.174424	0.00133183	6.80761e-11	0.00231157	34	23	43	33	219	104	379	262	48.1279	2.54768	2.22528	6.20598	5.8361
NM_001177600	Adam23	chr1	0	0	0	NA	NA	0.25	NA	NA	NA	0.625	NA	0	0	1	0	NA	NA	4	NA	0.909813	NA	NA	0.585481	NA
NM_011780	Adam23	chr1	1	0	0	NA	0.25	0.550622	NA	NA	0.625	0.000751412	NA	0	1	19	0	NA	4	1146	NA	28.58	0.178213	0.193254	46.8282	0.311008
NM_007403	Adam8	chr7	0	0	0	0.333333	1	NA	NA	1	0.25	NA	NA	1	1	0	0	3	4	NA	NA	0.287478	0.875014	0.874422	1.10998	0.830615
NM_007404	Adam9	chr8	4	0	0	0.57582	0.504864	0.589611	0.523574	2.23876e-11	0.683794	2.16682e-19	0.0275157	23	23	23	23	1979	1979	2563	2249	25.8853	61.1483	94.2131	131.656	114.395
NM_009621	Adamts1	chr16	3	0	0	0.407407	0.579221	0.594737	0.422594	0.0670104	1.24751e-05	0.000260058	0.0196868	18	20	21	20	108	783	385	240	4.20183	2.9948	25.41	15.3662	9.21218
NM_172619	Adamts10	chr17	4	0	0	0.481283	0.539683	0.373134	0.345679	0.660948	0.614655	0.0498001	0.0072755	5	5	5	5	188	63	67	81	6.1794	27.7656	18.7032	20.6891	15.4629
NM_175501	Adamts12	chr15	3	1	0	0.519481	0.666667	1	1	0.819893	0.15159	0.25	0.000976562	2	2	1	2	77	24	3	11	0.471035	21.7187	22.5165	2.57312	4.0858
NM_172053	Adamts16	chr13	0	0	0	NA	0	0	NA	NA	0.25	0.25	NA	0	1	1	0	NA	3	3	NA	2.47833	0.011356	0.969768	0.783962	0.0180947
NM_001033877	Adamts17	chr7	1	0	1	NA	0.375	0.295455	0.333333	NA	0.307456	0.00955988	1	0	6	11	1	NA	24	46	3	1.71674	0.187377	1.44013	4.57155	0.417994
NM_011782	Adamts5	chr16	0	0	0	0.47619	0.5	0.5	0.416667	1	1	1	0.312327	6	6	3	8	22	26	17	50	1.20901	0.850341	1.6666	1.64036	2.84314
NM_001081020	Adamts6	chr13	2	0	0	0.608696	0.346154	NA	NA	0.404873	0.168638	NA	NA	4	4	0	0	23	26	NA	NA	1.73043	3.33849	6.15208	0.88219	0.466627
NM_013906	Adamts8	chr9	0	0	0	NA	NA	0.333333	NA	NA	NA	0.6875	NA	0	0	2	0	NA	NA	6	NA	1.24075	0.0777601	0.398427	1.00043	0.0495611
NM_175314	Adamts9	chr6	4	0	0	0.672269	0.557143	0.473684	0.653061	1.14877e-07	0.402963	0.731009	0.0443842	9	8	6	7	243	71	77	49	1.51244	13.2884	6.25995	7.8698	3.86196
NM_029967	Adamtsl1	chr4	0	0	0	NA	1	1	NA	NA	0.25	0.03125	NA	0	1	2	0	NA	3	6	NA	2.08066	0.187346	0.810194	1.09663	0.413332
NM_029981	Adamtsl2	chr2	0	0	0	NA	NA	0	NA	NA	NA	0.125	NA	0	0	1	0	NA	NA	4	NA	2.65447	0.418149	0.0743928	2.3509	0.610755
NM_144899	Adamtsl4	chr3	0	0	0	1	0.392857	0.777778	NA	0.25	0.344928	0.179688	NA	1	8	3	0	3	28	9	NA	4.35802	0.161134	1.27179	0.459665	0.186728
NM_001038587	Adar	chr3	0	0	0	0.666667	0.631579	0.833333	0.666667	0.237885	0.359283	0.21875	1	2	2	1	1	19	19	6	3	0.835307	0.27684	0.380434	0.344488	0.16732
NM_052977	Adarb2	chr13	0	0	0	NA	NA	0.333333	NA	NA	NA	1	NA	0	0	1	0	NA	NA	3	NA	10.423	NA	0.0147349	0.649731	0.494885
NM_025748	Adat2	chr10	4	0	0	0.351351	0.583333	0.444444	0.377778	0.01408	0.194505	0.551484	0.135156	11	9	6	8	74	73	45	45	7.96372	5.09258	8.07811	5.67238	5.01737
NM_001100606	Adat3	chr10	0	0	0	0.875	NA	0.333333	NA	0.0703125	NA	0.6875	NA	1	0	1	0	8	NA	6	NA	0.927223	3.24258	1.53836	2.88921	1.02059
NM_172875	Adc	chr4	4	0	0	0.642857	0.655172	0.52	0.440476	0.184933	0.136046	0.887725	0.326134	3	5	5	6	29	29	52	86	15.4544	3.71262	4.52923	9.84704	19.672
NM_028105	Adck1	chr12	4	0	0	0.606557	0.533333	0.672131	0.5	0.00483251	0.491262	0.00985345	1	8	8	8	8	186	136	61	138	13.9711	18.1285	14.9398	13.2141	19.9526
NM_178873	Adck2	chr6	4	0	0	0.462121	0.458333	0.434783	0.53211	0.433537	0.411423	0.251322	0.5657	18	15	16	16	133	123	93	109	5.70956	3.97421	5.6337	5.53426	5.84931
NM_133770	Adck4	chr7	4	0	0	0.510204	0.533333	0.661972	0.486842	0.919607	0.698883	0.00855454	0.908777	6	7	7	7	98	60	73	76	14.4704	10.678	11.3799	12.2616	12.3292
NM_172960	Adck5	chr15	4	0	0	0.477912	0.417647	0.4	0.491379	0.526344	0.0380637	0.0568879	0.926078	9	9	9	9	249	172	103	117	7.96165	15.4681	13.1618	9.28061	10.3543
NM_009622	Adcy1	chr11	4	0	1	0.261966	0.443182	0.639286	0.501171	1.07903e-162	0.0374937	3.65585e-06	1	70	54	45	55	3159	356	281	433	121.56	34.0485	6.64374	5.379	8.32627
NM_001012765	Adcy5	chr16	1	0	1	0.5	NA	0.746032	NA	1	NA	0.000117055	NA	2	0	10	0	6	NA	63	NA	42.0188	0.658619	0.905622	7.6188	0.604763
NM_007405	Adcy6	chr15	4	0	0	0.495984	0.57529	0.542751	0.45283	0.893078	0.0180444	0.179695	0.191796	23	24	24	22	504	260	273	216	7.03058	13.1432	9.74713	10.7155	9.35756
NM_009623	Adcy8	chr15	1	0	1	NA	0.25	NA	NA	NA	0.000409541	NA	NA	0	9	0	0	NA	52	NA	NA	12.5087	0.0560477	3.7014	0.685912	0.285781
NM_009624	Adcy9	chr16	3	0	0	0.779221	0.585366	0.6875	0.64557	8.90985e-07	0.348889	7.95254e-06	0.0128124	14	10	17	15	78	41	145	80	15.5968	2.78813	3.75183	9.38528	4.78589
NM_001025372	Adcyap1r1	chr6	1	0	0	0.513514	0.484211	0.857143	0.733333	1	0.635663	0.125	0.118469	1	2	1	1	37	287	7	15	0.396522	0.559438	5.57366	0.215839	0.248425
NM_001024458	Add1	chr5	0	0	0	0.485294	0.564516	0.33	0.480769	0.903597	0.374152	0.00087372	0.768792	3	3	3	3	69	63	101	107	1.66262	1.13922	1.6009	2.46616	2.50455
NM_001102444	Add1	chr5	0	0	0	0.333333	NA	NA	0.333333	1	NA	NA	1	1	0	0	1	3	NA	NA	3	2.28451	0.0977006	0.139055	0.197087	0.200155
NM_013458	Add2	chr6	3	0	2	0.6	0.6875	0.804348	0.73494	0.136032	0.00105273	4.05604e-05	2.18066e-05	12	14	9	12	66	82	47	84	74.758	2.9157	5.2582	3.21078	6.03098
NM_001164100	Add3	chr19	0	0	0	0.55	0.642857	0.5	0.586207	0.518958	0.42395	1	0.458258	2	2	2	2	60	14	19	29	0.453566	1.37215	0.573346	0.711041	1.14334
NM_007410	Adh5	chr3	4	0	0	0.582694	0.542565	0.530303	0.495434	4.15258e-10	0.0126186	0.0703363	0.761556	11	11	11	10	1465	896	934	1327	44.1888	114.923	106.458	106.024	167.266
NM_028320	Adipor1	chr1	4	0	1	0.222037	0.353846	0.397015	0.306962	2.88904e-44	5.41637e-05	0.000193582	5.47004e-12	3	3	3	3	602	195	338	317	54.8577	188.348	105.418	129.782	139.185
NM_197985	Adipor2	chr6	4	0	0	0.551315	0.587774	0.545833	0.562084	6.7875e-06	1.05706e-05	0.0153601	0.000215394	21	19	20	20	1947	649	727	908	27.4816	61.2739	26.6154	37.7482	46.0121
NM_134079	Adk	chr14	4	0	1	0.519481	0.541237	0.705502	0.616438	0.429027	0.281477	3.55082e-13	0.000692998	6	6	6	6	465	194	312	221	47.8346	55.322	31.3063	56.0412	38.3307
NM_009628	Adnp	chr2	4	0	0	0.526882	0.615044	0.599078	0.677165	0.509419	0.000659557	0.00424904	8.0622e-05	6	6	6	6	187	228	222	129	42.2792	19.8613	41.4513	35.0842	24.9101
NM_175028	Adnp2	chr18	4	0	0	0.54321	0.473846	0.489879	0.327189	0.13349	0.374825	0.799161	3.93058e-07	14	14	14	14	326	329	249	219	9.89252	15.2677	17.4686	19.0874	15.5378
NM_001005419	Ado	chr10	4	0	0	0.655844	0.585507	0.586634	0.617571	8.59861e-15	0.00175234	9.50188e-07	4.32779e-06	25	24	26	24	622	348	821	391	16.6995	13.3235	10.2958	24.8137	12.1746
NM_001008533	Adora1	chr1	0	0	0	0	0	0.75	0.333333	9.53674e-07	0.125	0.625	0.6875	2	1	1	1	21	4	4	7	2.80579	1.38721	2.14124	0.444496	1.41651
NM_007413	Adora2b	chr11	3	0	0	0.406593	0.504065	0.866667	0.524476	0.0929469	1	0.00738525	0.616003	9	9	4	9	93	124	15	145	6.87423	6.18761	12.5561	2.88362	15.2771
NM_028121	Adpgk	chr9	4	0	0	0.469027	0.678466	0.530259	0.539823	0.204043	4.48288e-11	0.28296	0.258081	18	19	20	18	455	340	352	226	9.02446	19.9332	17.3737	24.7112	12.6755
NM_007414	Adprh	chr16	4	0	0	0.483725	0.530691	0.595436	0.552813	0.292601	0.0927545	3.22901e-05	0.000858494	11	11	11	11	1117	791	491	1021	30.9286	53.4519	55.9659	45.2914	74.2539
NM_172750	Adprhl1	chr8	0	0	0	0	0.0833333	0.111111	0	1.52588e-05	0.00634766	0.0390625	0.125	1	1	1	1	17	12	9	4	0.745477	0.703475	0.765655	0.908957	0.263745
NM_133883	Adprhl2	chr4	4	0	0	0.520681	0.559242	0.608392	0.568465	0.430018	0.0982579	0.0118499	0.0390529	6	6	6	6	414	212	146	242	12.8791	44.4695	30.2652	22.1558	37.1065
NM_013461	Adra1a	chr14	0	0	0	NA	1	NA	0	NA	0.25	NA	0.25	0	1	0	1	NA	3	NA	3	5.16536	NA	0.796748	0.29991	0.761447
NM_007416	Adra1b	chr11	2	0	0	0.337209	0.666667	0.25	0.533333	2.35018e-05	1	0.625	0.765992	13	1	1	6	173	3	4	46	6.10669	10.6593	0.422153	0.901649	3.92859
NM_013460	Adra1d	chr2	1	0	0	NA	0.586207	0.666667	0.5625	NA	0.458258	1	0.470879	0	5	1	5	NA	29	3	49	7.77239	0.141566	2.78725	1.07355	6.01524
NM_007417	Adra2a	chr19	0	0	0	NA	0.791667	NA	NA	NA	0.00661075	NA	NA	0	7	0	0	NA	24	NA	NA	3.98509	0.0891632	1.71321	NA	NA
NM_007419	Adrb1	chr19	3	1	0	0.88	0.630769	NA	0.684211	0.000156522	0.0463535	NA	0.167068	3	4	0	3	27	65	NA	20	8.25172	3.74147	16.9114	0.604816	3.64926
NM_130863	Adrbk1	chr19	4	0	0	0.489726	0.534722	0.525316	0.54386	0.769884	0.453372	0.577743	0.284314	6	6	6	6	297	146	160	172	72.0901	29.2188	24.3051	22.1141	30.2084
NM_177078	Adrbk2	chr5	4	1	1	0.53937	0.496774	0.171429	0	0.0325021	0.885762	1.67777e-26	5.68434e-14	28	28	26	11	766	784	249	45	19.0266	15.0696	22.9855	6.42611	3.19423
NM_019822	Adrm1	chr2	4	0	1	0.581395	0.409091	0.419355	0.7	0.360378	0.523467	0.47313	0.115318	1	1	1	1	45	22	31	22	24.211	32.6893	55.7525	30.2026	22.8629
NM_009634	Adsl	chr15	4	0	1	0.647244	0.707386	0.653061	0.657778	1.04832e-13	4.39249e-15	1.9054e-06	2.55238e-06	10	10	9	8	639	355	250	229	13.2754	59.5382	41.3214	31.6422	38.2801
NM_007422	Adss	chr1	4	0	0	0.33975	0.444717	0.547703	0.450586	2.75317e-25	0.0290592	0.122063	0.0175336	13	14	12	14	1045	409	291	601	45.3584	52.0821	25.9162	26.521	40.6829
NM_009636	Aebp1	chr11	3	0	1	0.0714286	0.711538	0.457143	0.368421	0.00183105	0.00318525	0.735879	0.359283	4	6	5	3	14	53	36	20	3.64766	1.98095	11.0395	8.31733	4.75689
NM_026531	Aen	chr7	0	0	0	0.538462	0.6	0.25	0.5625	0.845019	1	0.625	0.803619	1	1	1	1	27	5	4	16	0.135226	1.53254	0.311604	0.515252	1.95355
NM_010347	Aes	chr10	4	0	0	0.49537	0.508475	0.508035	0.48468	0.784206	0.625426	0.673126	0.32952	3	3	3	3	1095	964	816	1095	358.337	498.3	499.552	372.981	939.252
NM_027373	Afap1	chr5	3	0	1	0.358974	0.609375	0.625	0.741935	0.108129	0.00298728	0.00339388	0.0106738	8	23	19	7	40	192	148	31	4.81118	2.53529	9.11219	8.14311	3.19642
NM_178928	Afap1l1	chr18	0	0	0	0.846154	0.8	0.928571	NA	0.0224609	0.375	3.03239e-06	NA	3	1	8	0	13	5	28	NA	7.33888	1.02911	0.236244	2.94283	0.0793444
NM_008032	Aff2	chrX	3	3	0	NA	0	1	0	NA	2.22045e-16	1.42109e-14	4.76837e-07	0	7	5	3	NA	53	48	22	7.99103	1.14582	8.87092	7.64539	6.78132
NM_033565	Aff4	chr11	4	0	0	0.324773	0.485561	0.538126	0.511029	7.626e-38	0.395175	0.0227143	0.55179	16	16	17	17	1333	949	930	820	50.705	55.5014	55.5441	58.7538	50.4247
NM_054070	Afg3l1	chr8	1	0	0	0.602941	0.645161	0.736842	0.552632	0.114254	0.149613	0.0635681	0.627103	1	1	1	1	68	31	19	38	0.415629	3.07113	1.97829	1.74464	2.13037
NR_028260	Afg3l1	chr8	0	0	0	0	NA	NA	NA	0.25	NA	NA	NA	1	0	0	0	3	NA	NA	NA	0.056032	0.0544302	0.0387347	NA	NA
NM_027130	Afg3l2	chr18	4	0	0	0.548159	0.626016	0.588235	0.592417	0.01163	9.29653e-05	0.00320112	0.000171223	15	15	15	15	710	246	290	427	36.4989	38.3093	20.4271	26.1697	40.0275
NM_181411	Aftph	chr11	4	0	0	0.397626	0.521739	0.534653	0.619792	0.000202384	0.754652	0.550709	0.00110893	5	3	4	5	337	92	103	192	40.5252	27.749	14.1908	17.078	21.7376
NM_001005847	Aga	chr8	4	0	1	0.517241	0.615385	0.6875	0.27027	1	0.581055	0.0501025	0.00763208	1	1	1	1	29	13	32	37	1.99795	11.1542	10.9224	18.9007	18.8395
NM_178119	Agap1	chr1	0	0	0	NA	0.666667	NA	NA	NA	1	NA	NA	0	1	0	0	NA	3	NA	NA	0.652419	0.80179	1.37612	0.92499	0.422726
NM_001033263	Agap2	chr10	4	0	2	0.235294	0.565217	0.712329	0.389831	0.000198039	0.0440251	0.00037134	0.117477	8	8	8	7	53	257	75	60	111.634	3.3191	19.8523	4.7356	5.16083
NM_139153	Agap3	chr5	4	0	0	0.467005	0.609756	0.46	0.508475	0.392626	0.0186934	0.484118	0.926704	3	3	3	3	200	125	101	119	38.5291	28.7444	28.6279	24.6775	26.1281
NM_178630	Agbl3	chr6	0	0	0	0.571429	0.5	NA	0.25	0.790527	1	NA	0.625	2	2	0	1	14	6	NA	4	3.47882	1.6707	1.79421	2.02554	2.56529
NM_007425	Ager	chr17	0	0	0	0.4	0	0	NA	1	0.25	0.0625	NA	1	1	1	0	5	3	5	NA	0.254659	0.783367	0.704179	1.22908	0.985434
NM_010472	Agfg1	chr1	4	0	3	0.601134	0.722603	0.795918	0.739968	5.01977e-11	1.08665e-27	2.01336e-93	3.6781e-34	19	19	19	19	1067	586	1136	626	32.1228	40.2075	32.1626	55.7957	32.7362
NM_145566	Agfg2	chr5	0	0	0	0.478261	NA	0.444444	0.2	1	NA	1	0.375	1	0	1	1	23	NA	9	5	0.999834	1.40927	0.108421	0.896392	0.546208
NM_178162	Agfg2	chr5	4	0	1	0.526946	0.678571	0.723077	0.54321	0.352285	0.00140449	0.00042213	0.307067	10	10	9	9	338	85	65	163	11.1167	17.8212	6.48391	5.25889	18.3165
NM_025630	Aggf1	chr13	4	0	0	0.49582	0.511096	0.451146	0.463004	0.760903	0.414306	0.00542923	0.0294715	19	21	19	21	1572	1459	845	905	33.9025	43.0395	56.0016	36.4528	41.1306
NM_023538	Agk	chr6	4	0	0	0.486874	0.616352	0.507937	0.349345	0.625226	0.00415847	0.884383	6.01115e-06	9	9	9	9	420	160	189	229	37.78	28.7758	17.785	20.7611	27.6403
NM_001081326	Agl	chr3	4	0	0	0.506964	0.527244	0.465409	0.421053	0.832837	0.186439	0.142792	5.3285e-05	30	42	33	39	362	634	485	669	12.9434	6.36152	13.3308	14.7506	19.4594
NM_053014	Agpat3	chr10	4	0	0	0.577558	0.582003	0.550122	0.550239	0.00812058	1.9043e-05	0.0478105	0.0447937	7	7	7	7	309	705	420	424	70.5578	33.3095	98.7448	62.8017	71.814
NM_026644	Agpat4	chr17	4	0	1	0.495868	0.573333	0.289954	0.490798	0.948763	0.0860711	2.32273e-36	0.875581	7	7	7	7	245	151	897	164	39.1961	23.5699	24.5811	135.719	24.4563
NM_026792	Agpat5	chr8	4	0	0	0.53169	0.600746	0.601852	0.573529	0.313086	0.00116558	0.000291816	0.0178811	5	6	9	9	285	274	332	275	30.6226	21.405	22.9907	37.5417	31.1449
NM_018743	Agpat6	chr8	4	0	0	0.559915	0.532628	0.552773	0.572816	0.000261011	0.130497	0.0140892	0.00109097	19	18	18	19	946	572	570	520	24.9455	47.9635	38.3827	45.8621	44.1115
NM_172715	Agpat9	chr5	0	0	0	NA	NA	NA	0	NA	NA	NA	0.25	0	0	0	1	NA	NA	NA	3	2.12216	0.314132	0.223549	0.523669	0.437971
NM_177351	Agphd1	chr9	0	0	0	0.263158	0.777778	NA	0.666667	0.0635681	0.179688	NA	1	4	3	0	1	19	9	NA	3	1.88013	1.39469	0.693186	1.23305	1.11115
NM_172666	Agps	chr2	4	0	0	0.440252	0.580153	0.557292	0.438914	0.0378328	0.0801699	0.129419	0.0800647	18	12	15	15	321	133	193	223	13.1416	14.0291	9.62846	14.1079	14.6579
NM_021604	Agrn	chr4	4	0	0	0.53631	0.504972	0.504628	0.51312	0.000675197	0.555087	0.674591	0.516327	42	42	42	41	2235	3758	2307	694	30.2039	41.0634	85.1408	64.2331	20.0474
NM_007428	Agt	chr8	1	0	0	1	0.639205	0.333333	0.142857	0.125	1.13435e-19	1	0.125	1	13	1	2	4	1070	3	7	43.2072	0.79859	81.443	0.963821	1.664
NM_023328	Agtpbp1	chr13	3	0	1	0.529412	0.5	0.3	0.6875	1	1	0.34375	0.210114	1	1	1	1	17	8	11	16	40.6196	5.1736	3.84659	6.03745	6.37752
NM_009642	Agtrap	chr4	3	0	0	0.70073	0.682008	0.612903	0.589928	2.9549e-06	1.86724e-08	0.00613289	0.0413978	24	26	28	27	139	245	158	139	3.34105	2.60764	6.36526	5.78504	4.3784
NM_028398	Agxt2l2	chr11	4	0	1	0.474576	0.432432	0.28125	0.631579	0.794844	0.511376	0.0200616	0.359283	5	4	4	4	59	37	33	19	2.66815	4.58791	5.68184	3.69264	3.22796
NM_026375	Ahctf1	chr1	4	0	0	0.366667	0.566372	0.698969	0.604167	6.76861e-30	0.00545978	9.78557e-19	1.7347e-05	25	24	25	24	1822	457	491	435	10.0907	38.8762	14.1015	18.2144	16.7858
NM_145542	Ahcyl1	chr3	4	0	0	0.515093	0.506463	0.50197	0.537769	0.349211	0.526531	0.910602	0.00445154	15	16	15	16	1035	2572	1286	1462	191.775	52.9794	182.916	97.8055	113.912
NM_026203	Ahi1	chr10	4	0	0	0.398058	0.555556	0.540123	0.413284	0.000403018	0.0828706	0.164766	0.00510693	9	9	9	9	315	263	330	274	80.0385	14.5525	16.7035	25.1894	21.692
NM_009643	Ahnak	chr19	1	0	0	1	0.35	0.513514	0.277778	0.03125	0.00351764	0.639924	0.011331	2	22	41	9	6	100	374	36	5.16928	0.196616	2.59851	9.00972	1.80513
NM_146036	Ahsa1	chr12	4	0	0	0.488636	0.402597	0.419355	0.411765	0.821177	0.110016	0.146177	0.128396	1	1	1	1	176	80	97	86	115.568	179.168	93.7319	114.673	116.799
NM_172391	Ahsa2	chr11	4	0	0	0.357143	0.510638	0.5	0.539683	6.7467e-06	1	1	0.614655	3	3	3	3	254	50	77	63	26.71	50.7016	20.2992	23.1886	23.4497
NM_001012310	AI132487	chr12	0	0	0	0.894737	0.565217	0.75	0.571429	0.000728607	0.677639	0.289062	0.790527	3	5	2	3	19	24	8	15	1.49143	2.14636	2.34206	1.57153	2.394
NM_172381	AI314180	chr4	4	0	1	0.479339	0.704545	0.493333	0.453125	0.716294	0.00955988	1	0.532309	3	2	3	3	123	44	75	64	43.2138	42.883	25.1631	30.4122	37.0628
NM_207219	AI314976	chr17	4	0	0	0.609195	0.454545	0.44	0.619048	0.0530031	0.728332	0.479888	0.164149	2	2	2	2	87	34	50	44	11.9368	24.6842	12.3247	21.1603	16.7318
NM_001146117	AI316807	chr8	0	0	0	0.25	NA	0.6	0	0.289062	NA	1	0.25	1	0	1	1	8	NA	5	3	0.394852	0.323002	NA	0.506781	0.386003
NM_001002895	AI413582	chr17	4	0	0	0.473684	0.569767	0.415842	0.516279	0.570333	0.23538	0.110918	0.682493	3	3	3	3	152	88	103	217	56.5954	29.9716	25.9986	32.8338	71.9176
NR_027907	AI414108	chr9	3	0	0	0.43038	0.510949	0.53851	0.60625	0.0944745	0.864405	0.00235355	0.00887359	23	21	30	22	160	141	1610	161	9.27817	2.7911	4.27046	46.6563	4.78089
NM_153577	AI428936	chr7	0	0	0	0.333333	NA	NA	NA	0.507812	NA	NA	NA	2	0	0	0	9	NA	NA	NA	2.51227	0.959493	0.534375	0.589077	0.465304
NR_028364	AI450353	chr11	0	0	0	0.666667	0.666667	NA	NA	1	1	NA	NA	1	1	0	0	3	3	NA	NA	3.48883	3.87863	1.07192	1.0044	1.14004
NM_001160356	AI462493	chr19	4	0	3	0.681818	0.820225	0.809524	0.8	0.00427241	7.23736e-10	7.45972e-07	1.16881e-06	6	5	4	6	66	89	64	65	15.6415	28.8216	29.6749	26.726	33.7647
NM_001085515	AI464131	chr4	4	0	1	0.493548	0.773414	0.645875	0.683841	0.86474	2.82766e-24	7.78058e-11	2.23853e-14	32	28	33	33	314	335	502	431	10.1859	7.37701	9.63261	18.88	14.4505
NM_198626	AI480653	chr16	4	0	0	0.613174	0.614035	0.667331	0.586139	6.43162e-11	6.06413e-06	5.31529e-14	0.000125228	24	23	24	24	840	402	506	508	11.0654	23.2092	13.1097	21.1919	22.624
NM_178906	AI593442	chr9	0	0	0	NA	0.75	0.666667	0.333333	NA	0.625	1	0.301758	0	1	1	3	NA	4	3	15	64.2807	NA	1.27382	0.583775	2.78806
NM_001013028	AI597468	chr10	4	0	0	0.42	0.341176	0.604839	0.557377	0.322236	0.00451164	0.0243702	0.442626	5	5	7	6	52	87	127	61	10.843	4.91888	8.91609	15.8105	7.83774
NM_133818	AI597479	chr1	4	0	1	0.291572	0.343066	0.565657	0.51497	1.1705e-18	0.000300182	0.0753561	0.757026	13	11	13	12	439	137	204	170	17.8714	25.8161	12.3486	15.5354	16.5843
NM_198860	AI646023	chr10	2	0	0	0.714286	0.59375	0.557692	0.584615	0.0783539	0.377086	0.173291	0.0216892	6	7	17	16	21	32	158	197	5.01095	1.22767	2.2715	9.43826	9.37002
NM_001033139	AI846148	chr19	1	0	0	0.5	0.62963	0.75	0.166667	1	0.247789	0.625	0.21875	4	4	1	2	31	27	4	6	3.85456	2.9813	4.69785	2.45016	1.86623
NM_001167831	AI846148	chr19	0	0	0	1	NA	NA	NA	0.25	NA	NA	NA	1	0	0	0	3	NA	NA	NA	0.401519	0.248207	0.403735	0.389431	0.282495
NM_172645	AI848100	chr1	4	0	1	0.287603	0.447552	0.54251	0.439103	3.98992e-26	0.241604	0.203077	0.0360276	9	9	9	9	612	145	250	316	15.0393	31.5029	11.7416	21.5585	23.4927
NR_027236	AI854703	chr6	0	0	0	NA	0.809524	0.666667	NA	NA	0.00719738	0.237885	NA	0	5	4	0	NA	22	18	NA	11.4651	0.347794	1.50752	0.992145	0.151139
NM_178898	AI894139	chr6	3	0	2	0.588235	0.666667	0.238095	0.755102	0.262438	0.6875	0.0266037	0.000469757	11	2	5	8	52	6	22	50	9.97231	4.75145	2.79833	4.08091	3.85075
NM_183167	AI987944	chr7	4	0	0	0.538462	0.633333	0.677966	0.428571	0.677809	0.200488	0.0086415	0.571588	7	5	7	4	53	31	59	29	5.74711	4.91037	3.73925	7.9496	6.27928
NM_145144	Aif1l	chr2	4	0	0	0.494253	0.555844	0.593407	0.57529	0.774979	0.0321787	0.00241523	0.0180444	7	7	7	7	789	387	278	261	2.99301	73.8149	55.0206	42.676	36.0256
NM_012019	Aifm1	chrX	4	4	0	0.016129	0	1	0.0243902	2.73219e-17	9.31323e-10	3.72529e-09	3.81988e-11	2	2	2	2	62	34	31	42	15.8797	45.5914	26.1471	23.7173	40.1156
NM_001039194	Aifm2	chr10	0	0	0	0.44	0.769231	NA	0.65	0.690038	0.0922852	NA	0.263176	6	4	0	6	26	14	NA	20	1.46799	1.54262	1.2765	1.01316	1.82921
NM_175178	Aifm3	chr16	0	0	0	NA	0.738095	NA	NA	NA	0.00288725	NA	NA	0	9	0	0	NA	42	NA	NA	29.5769	0.446437	2.54162	NA	0.0338739
NM_025446	Aig1	chr10	2	0	0	NA	0.75	0.333333	0.615385	NA	0.625	0.122078	0.581055	0	1	2	2	NA	4	27	13	25.0463	1.44696	2.7459	10.9308	3.24489
NM_007926	Aimp1	chr3	4	0	0	0.55633	0.490241	0.587366	0.505777	3.23031e-06	0.587748	2.12862e-06	0.774417	12	12	12	12	1740	877	749	788	52.7315	96.6083	66.7799	69.9824	73.5586
NM_001172146	Aimp2	chr5	4	0	0	0.543689	0.694915	0.481481	0.436782	0.236161	0.00379371	0.891923	0.283607	2	2	2	2	210	61	55	90	2.4801	14.1212	5.77151	5.68866	8.89388
NM_016666	Aip	chr19	4	0	0	0.59375	0.469388	0.480769	0.543478	0.377086	0.77545	0.889884	0.658738	1	1	1	1	33	49	54	47	56.3125	56.2333	53.2974	67.4379	71.8955
NR_027773	Airn	chr17	0	0	0	0	1	0	0	0.25	0.03125	0.00390625	0.03125	1	2	2	2	3	6	9	6	1.97354	0.374072	1.19792	1.90746	2.68221
NM_021515	Ak1	chr2	4	0	2	0.763314	0.736264	0.637097	0.69147	8.94076e-34	2.81241e-15	0.00288824	1.31307e-19	6	6	6	6	515	279	129	561	56.1461	56.1517	45.4537	33.5061	119.429
NM_016895	Ak2	chr4	4	0	0	0.577818	0.661017	0.534653	0.478495	0.000268327	2.19953e-05	0.550709	0.607886	3	3	3	3	562	179	102	186	7.32428	74.3557	32.6615	27.3574	44.9217
NM_021299	Ak3	chr19	4	0	0	0.567513	0.520258	0.593284	0.54407	2.53291e-05	0.191927	1.09351e-09	0.00828113	14	14	14	14	993	1100	1087	925	43.6685	41.3935	65.7528	68.7789	68.5083
NM_001081277	Ak5	chr3	2	0	1	0.15	0.666667	0.6	0.272727	0.00257683	0.301758	0.232693	0.013531	6	4	9	8	20	15	45	33	27.5838	1.05579	2.95356	4.11272	3.48062
NM_001042541	Akap1	chr11	0	0	0	0.47619	NA	0.571429	NA	1	NA	1	NA	1	0	1	0	22	NA	7	NA	0.332667	1.12729	0.171142	0.448069	0.383195
NM_019921	Akap10	chr11	4	0	0	0.464286	0.654545	0.625	0.539683	0.142942	0.00153305	0.000859741	0.308505	11	9	13	11	451	112	189	190	10.3284	18.6864	5.72451	10.6403	11.11
NM_001164503	Akap11	chr14	4	0	0	0.473364	0.547125	0.541578	0.511329	0.0145584	0.000936938	0.00197424	0.425466	58	59	59	58	2152	1267	1424	1336	82.6222	25.4944	23.587	28.9951	27.5153
NM_031185	Akap12	chr10	4	1	0	0.495902	0.404382	0.474265	0.0910224	0.773749	2.11714e-05	0.43061	6.41252e-137	31	30	30	29	1477	506	275	809	11.4135	40.9213	18.9465	11.3652	38.8342
NM_029332	Akap13	chr7	4	0	0	0.525126	0.573529	0.564338	0.505682	0.340912	0.00343945	0.00305763	0.939943	52	46	51	38	407	410	548	177	5.90373	4.33668	6.46714	10.4429	3.93938
NM_001033785	Akap14	chrX	1	1	0	0	0	NA	0	1.49012e-08	0.0078125	NA	0.25	2	2	0	1	27	8	NA	3	1.86577	3.87703	1.92909	0.049455	1.45652
NM_001101471	Akap5	chr12	1	0	0	0.746269	0.461905	0.326087	0.625	6.73797e-05	0.30061	0.0258961	0.307456	16	32	11	8	69	215	47	24	28.2777	1.14913	4.50975	1.93553	1.00976
NM_198111	Akap6	chr12	0	0	0	0.4	0.461538	0.5	0.631579	0.424356	1	1	0.359283	5	2	2	3	25	13	6	19	59.6939	0.440299	0.376001	0.354044	0.385865
NM_018747	Akap7	chr10	2	0	1	0.54386	0.710843	0.519231	0.590164	0.596642	5.48087e-08	0.889884	0.200031	11	21	9	12	57	166	53	62	20.1737	2.0438	6.56434	3.17829	2.79548
NM_019774	Akap8	chr17	4	0	0	0.532727	0.517241	0.380319	0.541485	0.13552	0.518861	4.01388e-06	0.234184	11	12	12	11	554	411	382	232	32.6694	31.4756	23.4328	30.0768	17.9032
NM_017476	Akap8l	chr17	4	0	1	0.481752	0.463918	0.271318	0.45	0.732684	0.54261	2.03517e-07	0.518958	5	5	5	5	141	98	133	62	61.627	20.8274	29.0225	37.3398	18.1135
NM_194462	Akap9	chr5	4	0	0	0.536005	0.557328	0.596251	0.573248	0.00618594	0.000314331	7.82766e-13	4.58948e-05	66	67	67	65	1490	1012	1407	788	26.4869	13.6581	13.6613	20.0162	12.4168
NM_023423	Akirin1	chr4	4	0	0	0.545872	0.692308	0.517857	0.596154	0.198037	0.00778744	0.893853	0.0619264	3	3	3	3	221	54	59	104	39.8688	59.0351	33.5822	39.4505	55.1031
NM_001007589	Akirin2	chr4	4	0	0	0.476974	0.476562	0.579439	0.534137	0.455964	0.491843	0.0238552	0.310599	2	2	2	2	306	258	216	252	44.1431	42.6512	48.5449	35.1091	51.8342
NM_001045514	Akna	chr4	1	0	0	0.52381	0.541667	0.4	0.9	1	0.83882	1	0.0214844	4	4	1	2	21	24	5	10	0.902742	2.42447	3.68563	1.84531	1.4795
NM_021473	Akr1a4	chr4	4	0	0	0.508299	0.489715	0.492743	0.507508	0.545297	0.481958	0.608783	0.602664	4	4	4	4	1460	1278	1400	1340	258.653	366.685	346.89	445.856	469.75
NM_172398	Akr1b10	chr6	4	0	0	0.644144	0.536797	0.650307	0.6	2.08224e-05	0.29245	0.000153263	0.000126559	3	3	3	3	222	233	166	376	15.7834	28.2635	52.9364	44.543	80.1369
NM_009658	Akr1b3	chr6	0	0	0	0.727273	0.75	0.444444	0	0.226562	0.625	0.814529	0.0625	1	1	1	1	11	4	18	5	0.663591	0.604332	0.51608	1.51709	0.385177
NM_009731	Akr1b7	chr6	0	0	0	0	NA	0	0	0.25	NA	0.25	0.25	1	0	1	1	3	NA	3	3	0.396035	0.135781	0.128836	0.355061	0.360589
NM_008012	Akr1b8	chr6	0	0	0	0	NA	0.5	NA	0.25	NA	1	NA	1	0	1	0	3	NA	4	NA	1.91743	2.29578	0.36991	1.29129	0.345104
NM_134072	Akr1c14	chr13	0	0	0	NA	NA	NA	0.714286	NA	NA	NA	0.179565	0	0	0	3	NA	NA	NA	14	5.06558	0.0462044	0.0328809	0.326221	1.03071
NM_018859	Akr1e1	chr13	4	0	1	0.609948	0.66805	0.703704	0.560117	2.01967e-05	1.98525e-07	2.25544e-07	0.0301523	11	11	8	10	382	245	163	341	19.9425	26.0497	25.3431	23.5398	40.9296
NM_026270	Akt1s1	chr7	4	0	0	0.543165	0.548673	0.493151	0.491525	0.167642	0.346893	1	0.88056	5	5	4	5	283	117	74	180	15.108	41.7373	28.1225	27.1823	46.0852
NM_001110208	Akt2	chr7	0	0	0	0.555556	0.75	0.142857	0.458333	0.814529	0.289062	0.125	0.83882	1	1	1	1	18	8	7	24	0.818068	0.857185	0.940427	0.756506	1.42275
NM_011785	Akt3	chr1	4	0	1	0.388235	0.5	0.609756	0.724138	0.0502509	1	0.0186934	0.0241195	8	8	8	5	87	134	126	29	38.1487	7.88522	13.9055	19.5589	8.5156
NM_008525	Alad	chr4	4	0	1	0.453704	0.712766	0.515152	0.5	0.386573	4.49643e-05	0.902159	1	3	3	3	3	109	96	70	82	13.0293	26.8199	28.5249	24.1581	27.6676
NM_009655	Alcam	chr16	4	0	0	0.527638	0.345679	0.532225	0.437923	0.478491	0.0072755	0.171284	0.0102191	10	7	14	12	203	81	489	447	66.6365	11.4359	9.85671	47.591	43.3771
NM_145954	Aldh16a1	chr7	4	0	0	0.375	0.568182	0.474576	0.365854	0.00784659	0.451381	0.794844	0.117275	5	5	5	5	123	45	59	41	2.70689	17.7574	9.27019	10.8406	10.7639
NM_013467	Aldh1a1	chr19	2	0	2	0.234043	0.174603	0.809524	0.285714	0.000346001	1.6735e-07	7.45972e-07	0.179565	9	13	10	3	47	63	63	15	39.2179	2.50179	4.98505	4.71029	2.08176
NM_053080	Aldh1a3	chr7	0	0	0	0.285714	NA	NA	0.8	0.453125	NA	NA	0.375	1	0	0	1	7	NA	NA	5	0.470308	1.62809	0.49655	0.573445	1.2971
NM_028270	Aldh1b1	chr4	0	0	0	0	0	0.333333	NA	0.0078125	0.0078125	1	NA	2	2	1	0	8	8	3	NA	3.77628	0.662508	0.733393	0.73147	0.117293
NM_027406	Aldh1l1	chr6	2	0	1	0.705882	0.203846	0.307692	0.433333	0.143463	1.11671e-22	0.266846	0.584665	3	12	3	4	17	266	13	30	14.9422	2.28943	30.6821	2.50007	4.17329
NM_153543	Aldh1l2	chr10	4	1	0	0.556338	0.693122	0.673684	0.907609	0.0226653	1.14719e-07	4.5446e-09	3.77815e-32	12	12	12	12	428	192	288	184	1.94306	22.9218	11.1858	23.0303	13.0004
NM_009656	Aldh2	chr5	4	0	2	0.64375	0.715962	0.593472	0.788644	3.0582e-10	2.10299e-37	0.000708797	1.50946e-50	16	16	16	16	484	863	343	644	41.2985	17.7875	50.5239	21.9651	35.9278
NM_007437	Aldh3a2	chr11	4	0	0	0.509073	0.696286	0.623025	0.636752	0.589391	1.32591e-27	2.35692e-13	4.05672e-13	26	29	28	26	1004	767	897	710	23.9664	26.6639	23.6226	33.5133	30.3843
NM_026316	Aldh3b1	chr19	4	0	1	0.526667	0.428571	0.470588	0.204082	0.567775	0.313503	0.864166	3.84591e-05	4	4	4	4	151	64	35	49	5.80837	22.5076	13.9109	7.7884	9.3835
NM_175438	Aldh4a1	chr4	4	0	1	0.575163	0.633166	0.717514	0.553525	0.0749616	0.000210469	6.48086e-09	0.0408231	11	11	11	11	154	201	178	385	13.5659	15.0054	19.5591	26.0268	55.6817
NM_172532	Aldh5a1	chr13	4	0	0	0.459459	0.491304	0.434579	0.425743	0.365944	0.744179	0.0646866	0.0113573	20	27	23	25	149	465	215	305	26.8902	5.27233	18.9949	10.6423	14.6976
NM_134042	Aldh6a1	chr12	4	0	0	0.491961	0.490938	0.498789	0.516746	0.820609	0.53687	1	0.424473	14	18	14	16	313	1281	416	632	42.563	17.5618	79.9852	34.734	49.2931
NM_001127338	Aldh7a1	chr18	0	0	0	0.8	0.842105	0.724638	1	0.0351562	0.00442505	0.000244397	0.015625	2	2	2	2	15	19	69	7	0.402629	0.654898	1.13924	2.19774	0.608716
NM_138600	Aldh7a1	chr18	0	0	0	0.875	0.458333	0.404762	NA	0.00418091	0.665466	0.279956	NA	2	2	2	0	16	51	43	NA	0.3995	0.232847	1.02184	1.00466	0.0309182
NM_019993	Aldh9a1	chr1	4	0	0	0.447293	0.482192	0.695556	0.599034	0.054509	0.52999	6.37504e-17	0.00530633	11	11	11	11	353	370	454	211	12.1405	21.932	22.5602	38.3211	21.1267
NM_001177307	Aldoa	chr7	1	1	0	1	1	NA	1	0.0625	3.05176e-05	NA	0.03125	1	1	0	1	5	16	NA	6	1.48391	3.09653	3.79933	1.39608	3.62961
NM_007438	Aldoa	chr7	1	0	0	0.777778	0.4	0.4	NA	0.179688	0.607239	1	NA	1	1	1	0	9	16	5	NA	75.4373	83.044	56.3289	46.8941	110.924
NM_009657	Aldoc	chr11	4	0	4	0.705643	0.811374	0.775592	0.805101	9.51223e-86	6.76493e-259	1.30041e-193	4.49435e-230	9	9	9	9	2242	2876	2794	2667	313.985	137.429	323.748	340.955	311.52
NM_145362	Alg1	chr16	4	0	0	0.573944	0.627737	0.68125	0.537143	0.0148327	0.00351999	5.26904e-06	0.364388	8	7	8	8	289	138	161	176	8.27606	20.8609	13.5208	19.2856	20.0973
NM_001033441	Alg10b	chr15	4	0	4	0.849859	0.805293	0.815039	0.820821	2.69928e-294	8.64064e-94	1.60074e-109	1.49164e-98	41	39	42	40	2521	1074	1174	1009	7.86321	42.466	24.6984	29.5807	28.1093
NM_183142	Alg11	chr8	4	0	0	0.595331	0.517241	0.54717	0.677852	0.00268223	0.780739	0.382126	1.6867e-05	11	11	11	11	262	119	109	150	14.3135	12.4516	7.24994	13.3793	14.0686
NM_001142357	Alg12	chr15	0	0	0	0	0.6	0.166667	0.25	0.03125	1	0.21875	0.625	1	1	1	1	6	5	6	4	1.99284	2.17454	2.22687	1.87232	1.81696
NM_026247	Alg13	chrX	0	0	0	0	0	1	0	0.25	0.25	0.25	0.25	1	1	1	1	3	3	3	3	2.85418	2.41094	2.25495	2.3777	3.40255
NM_024178	Alg14	chr3	4	0	0	0.569132	0.551282	0.59375	0.482955	0.0170976	0.229658	0.0113455	0.706371	7	6	7	7	312	159	197	178	15.7509	38.7946	29.0655	33.3068	40.2541
NM_019998	Alg2	chr4	4	0	0	0.5	0.443888	0.541156	0.478339	1	0.000436475	0.0541292	0.328485	13	13	13	13	657	1018	584	562	72.9742	29.9527	54.8152	44.6743	39.2419
NM_145939	Alg3	chr16	4	0	0	0.649635	0.494737	0.5	0.446154	0.000580988	1	1	0.457021	9	8	9	9	137	96	69	66	6.56961	10.9402	13.2015	12.3762	6.9476
NM_025442	Alg5	chr3	4	0	0	0.459559	0.523438	0.508982	0.482759	0.202822	0.658701	0.877067	0.780739	8	8	8	8	275	130	170	118	20.9504	44.0436	34.0485	49.2218	37.9346
NM_001081264	Alg6	chr4	4	0	2	0.701754	0.392857	0.758621	0.697674	1.95964e-05	0.344928	0.000100497	0.0137182	8	5	8	6	114	29	59	43	3.85594	5.56868	3.17548	4.35433	4.79785
NM_199035	Alg8	chr7	4	0	0	0.465	0.485294	0.470588	0.608696	0.358003	0.903597	0.864166	0.183925	5	5	4	5	201	68	34	46	6.66905	33.0836	16.4725	10.1866	14.2583
NM_133981	Alg9	chr9	4	0	0	0.575246	0.553879	0.569182	0.612613	6.8262e-05	0.0228173	0.015762	2.39044e-06	15	15	15	15	716	466	323	448	13.1977	35.4519	29.2769	24.8713	32.8114
NM_001102565	Alkbh1	chr12	4	0	0	0.535088	0.584507	0.407407	0.472	0.320519	0.0051974	0.0224057	0.591684	16	17	17	16	231	292	167	125	6.35798	9.07586	11.6381	8.59846	7.99308
NM_175016	Alkbh2	chr5	1	0	0	0.461538	0.666667	0	0.666667	0.749259	0.507812	0.25	0.6875	2	2	1	1	41	9	3	6	5.29603	14.3201	5.73702	2.24679	9.21158
NM_026944	Alkbh3	chr2	4	1	0	0.391813	0.455026	0.54321	0	0.00574565	0.244421	0.505236	4.23516e-22	5	5	5	5	173	190	81	72	9.37629	33.3128	43.8215	23.0377	24.7856
NM_028070	Alkbh4	chr5	4	1	0	0.590909	0.9	0.673913	0.5	0.109295	0.000402451	0.0258961	1	8	5	7	8	89	20	47	77	4.14125	6.23214	3.94225	5.22531	8.14388
NM_172943	Alkbh5	chr11	4	0	0	0.317155	0.488506	0.526786	0.461988	2.78763e-37	0.630234	0.277177	0.093301	19	18	19	19	1206	530	453	517	20.5276	41.1754	24.4984	27.7711	29.5778
NM_198027	Alkbh6	chr7	4	0	0	0.507463	0.520833	0.363636	0.605882	0.931202	0.67707	0.00544743	0.00708832	5	6	5	5	135	146	110	171	58.8548	28.3321	34.5396	33.4799	38.9537
NM_025538	Alkbh7	chr17	4	0	2	0.741935	0.42	0.40625	0.794872	0.0106738	0.322236	0.377086	0.000294077	4	4	4	4	31	50	32	40	9.45613	9.40377	9.21825	8.89165	14.8847
NM_026303	Alkbh8	chr9	4	0	0	0.526316	0.541667	0.533333	0.651163	0.603046	0.555998	0.698883	0.00667392	6	6	6	6	135	72	61	87	15.6708	17.6251	10.5231	12.069	12.8916
NM_145223	Alms1	chr6	4	0	0	0.574879	0.546218	0.447761	0.513274	0.00267469	0.359358	0.26135	0.85087	25	19	24	19	416	121	134	114	4.64758	7.25297	4.54953	3.99444	4.01155
NM_027808	Alpk1	chr3	1	0	0	NA	0.522727	0.356098	0.08	NA	0.880396	4.56136e-05	1.94311e-05	0	8	24	6	NA	45	207	25	4.99011	NA	2.04547	7.15271	1.42653
NM_007431	Alpl	chr4	3	1	0	0	0.4	0.833333	0.478261	3.72529e-09	0.753906	0.21875	1	1	1	1	1	29	12	6	23	3.63998	14.2335	18.5008	7.18568	26.2568
NM_146109	Als2	chr1	0	0	0	0	NA	NA	NA	0.25	NA	NA	NA	1	0	0	0	3	NA	NA	NA	2.15033	0.934739	0.841678	0.927836	0.729508
NM_008537	Amacr	chr15	4	0	1	0.666667	0.581395	0.690141	0.735294	0.0356978	0.360378	0.0018204	0.000130839	7	6	9	10	45	43	72	69	2.5517	3.61942	3.09087	4.3021	6.39633
NM_172935	Amdhd2	chr17	0	0	0	NA	0.75	NA	NA	NA	0.289062	NA	NA	0	1	0	0	NA	8	NA	NA	9.02215	15.0189	32.8059	23.746	26.6995
NM_177275	Amigo3	chr9	2	0	0	0	0.5	0.56	0.285714	0.25	1	0.690038	0.453125	1	2	4	2	3	12	25	7	1.89784	1.19944	3.06654	3.65924	1.45109
NM_019496	Ammecr1	chrX	2	2	0	NA	0	1	NA	NA	0.00012207	3.8147e-06	NA	0	2	3	0	NA	14	19	NA	1.83288	1.72598	3.49089	8.4091	0.868476
NM_153515	Ammecr1l	chr18	4	0	0	0.434109	0.490066	0.466912	0.466887	0.0397211	0.773619	0.302637	0.274225	10	9	10	10	259	305	279	306	16.6455	15.5162	28.2845	26.2111	27.3934
NM_033603	Amn	chr12	0	0	0	1	NA	NA	NA	0.25	NA	NA	NA	1	0	0	0	3	NA	NA	NA	2.60541	0.3017	0.190846	0.157786	0.213657
NM_153319	Amot	chrX	2	2	0	0	0	1	0	1.35525e-20	8.07794e-28	1.13687e-13	1.13687e-13	12	9	9	10	67	93	46	44	6.74197	2.54692	4.4965	3.02141	2.48869
NM_001081395	Amotl1	chr9	4	0	0	0.493213	0.5	0.505673	0.490149	0.246345	1	0.711345	0.233597	51	51	50	51	7521	1968	1252	3794	13.7279	110.78	41.194	27.8545	89.9326
NM_019764	Amotl2	chr9	2	0	0	NA	0.578947	0.561798	0.4	NA	0.150518	0.115232	1	0	8	7	1	NA	97	183	5	3.87093	0.835616	13.4469	29.1393	2.21196
NM_028779	Ampd2	chr3	4	0	0	0.488172	0.540839	0.473896	0.560538	0.642882	0.0906446	0.447039	0.0814361	18	18	18	17	473	457	253	227	17.7787	17.549	20.8583	14.1797	11.4661
NM_009667	Ampd3	chr7	4	0	0	0.350746	0.352941	0.384615	0.407407	0.00069521	0.332306	2.63495e-08	0.119274	14	4	15	11	136	19	594	81	12.1804	8.43678	4.31103	55.0098	8.92537
NM_175007	Amph	chr13	4	0	0	0.613527	0.507304	0.457189	0.667984	1.68594e-08	0.71557	0.0365275	1.29915e-20	20	20	20	20	629	766	625	767	124.357	27.8977	48.4124	38.8611	52.9595
NM_001013814	Amt	chr9	4	0	1	0.540541	0.62963	0.5	0.242424	0.742829	0.000168894	1	0.00455138	5	6	5	5	37	220	26	33	13.1435	4.90246	38.1036	6.9561	8.355
NM_025275	Amz2	chr11	4	0	0	0.344353	0.56087	0.493711	0.511521	5.32911e-25	0.0102585	0.866435	0.665781	15	15	15	15	1097	463	320	440	29.1252	60.9981	37.1993	26.1842	43.2756
NM_008569	Anapc1	chr2	4	0	0	0.58352	0.558747	0.572447	0.570863	1.81831e-12	7.57769e-05	2.90105e-07	5.25829e-07	37	37	38	37	1802	1163	1278	1272	15.7381	35.8361	32.751	41.0156	40.1987
NM_026904	Anapc10	chr8	4	0	0	0.456693	0.428571	0.409091	0.357143	0.374957	0.171565	0.109295	0.00170949	2	6	5	6	127	105	90	127	10.0232	12.8815	13.5424	10.8802	17.5059
NM_001038230	Anapc11	chr11	2	0	0	0.342373	0.606061	0.625	0.504425	6.66791e-08	0.296206	0.0599412	1	3	2	2	2	298	34	65	113	1.66675	5.95896	1.42542	2.72365	3.29798
NM_181394	Anapc13	chr9	4	0	0	0.67624	0.639053	0.597222	0.565421	4.55948e-12	3.57927e-07	0.00515652	0.0646866	2	2	2	2	389	342	219	217	91.5068	149.747	150.319	104.737	129.144
NM_025514	Anapc16	chr10	4	0	0	0.639478	0.694362	0.67161	0.672065	4.82773e-12	2.31347e-24	7.19204e-14	1.59317e-14	10	10	10	10	618	683	481	497	18.748	35.064	45.127	39.6104	45.848
NM_175300	Anapc2	chr2	4	0	0	0.497297	0.514286	0.520833	0.531915	1	0.84537	0.759649	0.500629	2	3	3	2	186	108	96	141	35.7058	52.065	61.1217	54.89	61.1459
NM_024213	Anapc4	chr5	4	0	0	0.533333	0.398551	0.576923	0.507353	0.286302	0.0211995	0.0952534	0.931708	3	3	3	3	289	141	134	140	37.1157	51.6155	37.0932	47.4673	40.3462
NM_019805	Anapc7	chr5	4	0	0	0.536232	0.527778	0.56051	0.628866	0.330531	0.502445	0.150614	0.0143896	6	6	6	6	209	180	157	98	14.8648	20.8427	28.6995	22.1881	14.935
NM_144524	Angel1	chr12	4	0	0	0.424528	0.3875	0.459459	0.527778	0.144782	0.0566644	0.742829	0.723948	5	5	4	5	109	80	38	74	3.3227	9.58043	10.4825	8.95441	8.25222
NM_021421	Angel2	chr1	4	0	0	0.344	0.469072	0.593548	0.502564	6.88194e-26	0.242912	0.00117148	0.959623	13	12	13	13	1131	395	316	393	32.5691	70.6235	33.7806	31.5291	42.3609
NM_009640	Angpt1	chr15	1	0	0	NA	0.333333	0.6	0.619048	NA	1	0.232693	0.38331	0	1	5	3	NA	3	46	21	3.71623	NA	1.38066	5.02257	1.89898
NM_007426	Angpt2	chr8	2	0	1	0.5	0.707317	NA	NA	1	1.11715e-07	NA	NA	4	4	0	0	561	165	NA	NA	5.06292	111.304	61.4566	0.322267	0.509108
NM_028333	Angptl1	chr1	1	1	0	0	NA	0.875	NA	0.0625	NA	0.000277162	NA	1	0	2	0	5	NA	24	NA	1.0355	1.6507	1.06458	8.29579	0.328778
NM_011923	Angptl2	chr2	0	0	0	0.47619	0.666667	0.411765	0.307692	0.877614	1	0.629059	0.266846	9	1	4	3	42	3	17	13	2.31306	2.85377	0.676951	2.85633	1.96
NM_020581	Angptl4	chr17	0	0	0	NA	0.8	0.5	1	NA	0.375	1	0.25	0	1	1	1	NA	5	6	3	3.13359	0.920627	2.62062	1.7706	0.378562
NM_145154	Angptl6	chr9	0	0	0	0.444444	0.653846	0	0.5625	0.701108	0.168638	0.25	0.803619	4	3	1	2	30	27	3	16	5.27935	2.96149	2.98136	1.35995	2.99243
NM_020332	Ank	chr15	4	0	0	0.4	0.462667	0.482311	0.406586	1.51479e-05	0.0445378	0.319317	1.17151e-13	14	13	14	14	476	760	858	1592	98.0735	23.767	63.2848	71.6135	148.958
NM_001034168	Ank2	chr3	0	0	0	0.5	0.333333	NA	NA	1	0.189247	NA	NA	7	5	0	0	42	21	NA	NA	23.7503	1.16751	1.14701	0.243159	0.230481
NM_178655	Ank2	chr3	4	0	0	0.466265	0.525717	0.594005	0.476534	0.000814427	0.0286985	0.000372216	0.288159	11	11	11	10	2515	1873	370	557	41.0154	72.7158	66.196	15.2672	23.2105
NM_176980	Ankar	chr1	0	0	0	0	NA	NA	NA	0.25	NA	NA	NA	1	0	0	0	3	NA	NA	NA	0.120796	0.333499	0.210961	0.0775188	0.13777
NM_001042714	Ankdd1b	chr13	0	0	0	0.6	0.59322	0.525424	0.269231	0.0568879	0.192526	0.794844	0.0289593	11	10	10	5	100	59	59	26	5.2885	1.72096	1.6006	1.73771	1.11316
NM_009671	Ankfy1	chr11	4	0	0	0.388046	0.53869	0.576471	0.512315	3.63669e-13	0.0490601	0.00187241	0.57054	20	20	20	19	1066	681	430	614	20.2111	49.0323	38.4357	32.0452	43.4331
NM_175375	Ankhd1	chr18	4	0	0	0.535211	0.612903	0.558621	0.575472	0.337442	0.0149846	0.183746	0.144782	8	9	8	8	214	126	148	106	25.2235	19.7364	19.466	21.1357	17.0034
NM_001003909	Ankib1	chr5	4	0	0	0.67451	0.650943	0.627863	0.685969	2.40079e-15	3.42801e-12	5.18485e-09	2.2549e-15	17	17	16	17	515	536	528	451	16.0762	17.6547	23.5708	25.5546	23.2292
NM_027922	Ankle2	chr5	4	0	0	0.4884	0.575893	0.52621	0.510806	0.529394	0.00152016	0.261615	0.657633	33	32	31	32	826	451	498	515	14.5535	15.7889	11.8525	15.5295	16.7203
NM_146033	Ankmy2	chr12	4	0	0	0.455621	0.445255	0.506098	0.505556	0.281478	0.231537	0.937791	0.940612	7	7	7	7	172	139	164	183	49.292	18.5666	19.589	26.9928	33.4476
NM_023472	Ankra2	chr13	4	0	0	0.647059	0.588235	0.646552	0.566845	3.19941e-05	0.035211	0.00204933	0.0789713	5	5	5	5	205	155	119	188	22.6109	20.4637	26.6907	19.5478	26.7952
NM_001081379	Ankrd11	chr8	4	0	0	0.552553	0.592689	0.547967	0.573944	0.0622734	3.24658e-07	0.0192731	0.0148327	29	30	30	28	337	781	623	287	22.5453	9.33671	26.8635	24.4414	11.2654
NM_001025572	Ankrd12	chr17	4	0	0	0.442231	0.577114	0.345455	0.527363	0.0769617	0.00230636	3.76421e-13	0.294913	26	29	32	31	252	407	554	404	26.8003	5.32118	9.22772	18.1367	11.592
NM_026718	Ankrd13a	chr5	4	0	0	0.576923	0.510526	0.577428	0.543379	0.00276538	0.827779	0.00291501	0.223777	6	6	6	6	395	191	385	222	25.274	54.2616	41.5319	72.2177	54.0516
NM_172945	Ankrd13b	chr11	4	0	0	0.323077	0.605505	0.520833	0.513514	1.18397e-08	0.00223124	0.759649	0.907561	11	11	10	10	261	222	97	74	22.6244	16.5086	16.4836	9.66993	7.98588
NM_001013806	Ankrd13c	chr3	4	0	0	0.368421	0.5	0.583333	0.415094	0.143307	1	0.541256	0.271679	2	1	2	2	38	14	24	53	42.8983	35.053	18.9625	36.0637	44.2894
NM_026720	Ankrd13d	chr19	4	0	0	0.382022	0.511111	0.576923	0.466667	0.0334167	1	0.557197	0.855536	5	5	4	5	89	48	26	30	27.4305	9.60323	9.01192	7.40942	5.96937
NM_177268	Ankrd16	chr2	4	0	0	0.62439	0.487395	0.535354	0.386667	0.000450821	0.85463	0.546713	0.0639499	11	12	11	10	206	119	99	75	9.308	6.91652	6.42604	6.29256	5.43386
NM_030886	Ankrd17	chr5	1	0	0	0.30303	0.384615	0.6	0.392857	0.035082	0.581055	0.424356	0.344928	1	1	1	1	33	13	25	29	2.39127	2.0087	3.3381	2.30648	2.61954
NM_027480	Ankrd24	chr10	4	0	0	0.457711	0.5	0.45283	0.420168	0.259034	1	0.382126	0.0985236	11	14	14	11	204	136	106	121	10.2529	3.69051	3.80211	3.56141	3.96131
NM_001081112	Ankrd26	chr6	4	0	0	0.438356	0.532338	0.545833	0.517045	0.00178061	0.397378	0.175119	0.706371	37	33	32	31	666	202	243	178	6.407	11.7347	5.00347	6.8363	5.63308
NM_145633	Ankrd27	chr7	4	0	0	0.540816	0.539419	0.601562	0.5	0.0356602	0.246204	0.00138797	1	25	25	24	22	690	244	259	199	11.7392	14.5424	7.88579	8.2181	7.06687
NM_178263	Ankrd27	chr7	0	0	0	0.611111	0	0.428571	0	0.480682	0.25	1	0.25	2	1	2	1	18	3	7	3	1.41675	0.849177	0.500117	0.459426	0.699868
NM_001024604	Ankrd28	chr14	4	0	0	0.46729	0.545455	0.566092	0.693333	0.562093	0.455741	0.0157329	0.00107952	7	7	7	6	108	89	357	76	19.3268	17.1216	21.9549	78.0984	16.8852
NM_001024851	Ankrd34a	chr3	0	0	0	NA	0.571429	NA	NA	NA	1	NA	NA	0	2	0	0	NA	7	NA	NA	20.3942	0.0873703	0.559586	0.445516	0.17402
NM_207260	Ankrd34c	chr9	0	0	0	NA	1	NA	NA	NA	0.25	NA	NA	0	1	0	0	NA	3	NA	NA	4.44033	0.114111	2.50114	NA	NA
NM_001039562	Ankrd37	chr8	1	0	0	0.614035	NA	0.421053	NA	0.111161	NA	0.647606	NA	4	0	3	0	58	NA	19	NA	11.5458	6.81068	0.533587	2.74497	0.796487
NM_026241	Ankrd39	chr1	4	0	1	0.359649	0.688889	0.571429	0.25	0.00350468	0.0160944	0.254305	0.0413895	13	10	14	5	116	45	78	20	3.84175	8.44427	4.45632	5.85529	3.02362
NM_027799	Ankrd40	chr11	4	0	0	0.323459	0.466119	0.49522	0.446125	2.58329e-36	0.146966	0.861173	0.0148228	8	8	8	8	1254	494	525	531	38.4374	46.8632	31.2323	34.5562	33.9347
NM_028665	Ankrd42	chr7	3	0	1	0.186441	0.47	0.190476	0.34375	1.24163e-06	0.617299	0.00719738	0.110184	9	11	4	7	59	101	22	32	19.3441	3.18768	5.02822	2.35734	4.14104
NM_175134	Ankrd46	chr15	4	0	0	0.557423	0.53866	0.559934	0.498603	0.00241127	0.140853	0.00349357	0.970192	14	14	14	14	719	395	617	717	133.75	45.1879	45.2539	61.4646	66.1232
NM_019683	Ankrd49	chr9	4	0	0	0.608696	0.428571	0.4	0.592593	0.0911865	0.790527	0.424356	0.442068	2	2	2	2	69	14	25	27	9.75712	24.6881	15.4954	12.9117	18.0618
NM_172790	Ankrd52	chr10	4	0	0	0.596154	0.532051	0.54717	0.576923	0.211609	0.471286	0.382126	0.557197	5	7	7	5	52	159	106	26	13.2952	6.70305	23.9662	18.9438	6.57165
NM_144849	Ankrd54	chr15	4	0	0	0.479592	0.56	0.657895	0.619048	0.762036	0.479888	0.0729514	0.164149	2	2	2	2	98	50	39	43	7.02844	19.3396	15.2397	9.95715	10.5914
NM_172939	Ankrd57	chr10	4	0	1	0.409091	0.661017	0.42623	0.75	0.291215	0.0183371	0.305677	0.000134514	3	5	5	5	44	61	62	61	4.36233	6.04659	9.19397	15.7723	11.7491
NM_175207	Ankrd9	chr12	1	0	0	0.542373	0.814815	0.666667	0.736842	0.602923	0.00151372	1	0.0635681	7	6	1	5	61	27	3	19	2.46637	3.17976	1.97999	1.28189	2.70924
NM_181413	Anks1	chr17	4	0	1	0.530769	0.784314	0.360294	0.62963	0.53942	5.70381e-05	0.00141864	0.247789	9	7	9	7	136	51	138	29	6.19475	12.1454	5.52476	21.2847	6.07353
NM_001128086	Anks1b	chr10	0	0	0	NA	NA	0.5	0.8	NA	NA	1	0.0118179	0	0	3	3	NA	NA	14	20	4.54483	0.363533	0.356437	1.00132	1.39021
NM_001177397	Anks1b	chr10	0	0	0	NA	0.111111	0.466667	NA	NA	0.0390625	0.855536	NA	0	2	5	0	NA	9	30	NA	6.76214	0.0468366	0.644395	1.5187	0.0995058
NM_028301	Anks3	chr16	4	0	0	0.473684	0.513699	0.462687	0.457831	0.466389	0.80402	0.436991	0.51041	9	8	8	7	232	147	137	83	15.1984	19.9051	13.3396	14.7051	11.563
NM_001024136	Anks6	chr4	0	0	0	0.6375	0.6	0.479167	0.375	0.0183161	0.268187	0.885433	0.15386	16	11	11	9	81	40	49	40	2.82387	2.33764	2.01437	2.42018	1.84972
NM_026187	Ankzf1	chr1	4	0	1	0.285714	0.55102	0.462963	0.47541	6.79057e-09	0.568172	0.683489	0.798153	9	8	9	7	182	50	54	62	10.3646	14.7805	6.08118	6.47916	7.72013
NM_028390	Anln	chr9	4	0	0	0.594595	0.653543	0.668182	0.480287	1.49835e-07	0.000684609	6.80744e-07	0.549461	18	15	18	18	784	128	222	280	6.65566	29.1229	7.60783	14.6479	16.1544
NM_133979	Ano10	chr9	4	0	0	0.538462	0.62749	0.659091	0.639723	0.0571083	1.21023e-08	2.31113e-13	6.48807e-09	16	16	16	16	643	511	536	437	16.321	27.1232	29.9427	36.6564	34.7684
NM_001081556	Ano3	chr2	0	0	0	1	0.666667	NA	NA	0.25	1	NA	NA	1	1	0	0	3	3	NA	NA	3.20516	1.10322	0.802542	0.807765	0.664085
NM_175344	Ano6	chr15	4	0	0	0.628067	0.612344	0.556301	0.611557	3.90105e-31	3.89804e-22	4.12804e-05	3.2821e-15	34	34	34	34	2056	1867	1357	1256	10.1259	45.0893	55.8204	46.659	44.5722
NM_001164679	Ano8	chr8	4	0	1	0.657534	0.555556	0.344828	0.785714	0.00954221	0.814529	0.136046	0.00371917	2	1	1	1	73	18	31	28	13.6157	27.686	12.5428	14.7706	17.229
NM_009672	Anp32a	chr9	4	0	0	0.403361	0.54	0.642857	0.45	0.0432683	0.671811	0.42395	0.518958	1	1	1	1	121	53	14	60	126.677	120.838	135.119	72.4174	111.717
NM_130889	Anp32b	chr4	4	0	0	0.602484	0.535452	0.495575	0.515152	0.0114373	0.166123	0.946984	1	3	3	3	3	161	419	229	33	11.7613	33.1389	73.3366	54.2631	14.814
NM_023210	Anp32e	chr3	4	0	0	0.56485	0.547955	0.55995	0.529227	3.8291e-11	0.000333788	1.88062e-06	0.0210538	16	16	16	16	2620	1438	1614	1602	37.3102	100.626	73.8054	82.6661	87.1852
NM_054041	Antxr1	chr6	4	0	0	0.504545	0.608247	0.570175	0.541379	0.946268	2.34621e-05	0.0109318	0.176719	18	18	18	18	221	391	346	291	4.57313	8.83113	20.5719	18.1994	17.2175
NM_133738	Antxr2	chr5	4	0	1	0.611111	0.44	0.282051	0.393939	0.0763692	0.690038	0.0094753	0.296206	3	3	3	3	73	25	41	33	1.03862	16.9259	6.00114	21.4766	8.37405
NM_001081317	Anubl1	chr6	2	0	1	0.75	0	0.222222	0.411765	0.0413895	0.25	0.179688	0.629059	3	1	2	3	20	3	9	17	4.75958	3.89935	1.90281	2.79679	3.97646
NM_010730	Anxa1	chr19	4	3	1	0.895262	0.947368	0.764706	0.93985	2.52476e-126	4.29018e-13	0.0490417	3.8403e-28	6	6	3	6	808	57	17	133	1.95908	78.5525	10.0276	4.76469	20.9039
NM_013469	Anxa11	chr14	1	0	0	NA	0.307692	0.333333	NA	NA	0.266846	0.15159	NA	0	3	5	0	NA	13	24	NA	11.763	0.047169	2.24901	4.47742	0.225477
NM_007585	Anxa2	chr9	4	1	0	0.519298	0.390476	0.991111	0.521986	0.553693	0.0313018	9.43103e-64	0.258517	3	3	3	3	286	105	226	707	12.315	63.268	36.6863	77.2713	264.507
NM_013470	Anxa3	chr5	0	0	0	NA	0.969697	1	NA	NA	7.91624e-09	0.03125	NA	0	6	2	0	NA	33	6	NA	7.57333	NA	2.86941	0.665924	NA
NM_013471	Anxa4	chr6	3	2	0	0	0.0535714	0.5	0	1.86265e-09	8.1371e-13	1	0.0078125	5	5	5	1	30	57	32	8	2.59819	7.16284	10.3151	5.88462	3.63966
NM_009673	Anxa5	chr3	4	1	0	0.592371	0.673313	0.639583	0.00837321	2.52034e-15	5.4877e-19	5.35193e-43	2.43054e-235	16	16	16	15	1856	656	2442	843	72.4559	84.3499	39.9867	175.084	74.157
NM_013472	Anxa6	chr11	2	0	0	0.402439	0.4	1	NA	0.015235	0.361595	0.00195312	NA	1	1	1	0	165	30	10	NA	1.47498	15.4532	3.89733	1.89836	0.033823
NM_009676	Aox1	chr1	4	1	1	0.123864	0.313725	0.388889	0.222389	2.02875e-245	4.1221e-22	1.10067e-06	3.24392e-96	20	20	20	20	1775	671	490	1338	4.07375	59.3208	29.024	24.4917	71.7231
NM_145964	Ap1ar	chr3	4	0	0	0.434389	0.433962	0.563492	0.507042	0.0593893	0.206498	0.181224	1	7	6	7	6	223	109	129	71	50.4348	21.8377	15.7424	23.5464	12.3519
NM_007454	Ap1b1	chr11	4	0	0	0.424731	0.630769	0.576159	0.593407	0.0474411	0.00363401	0.0730492	0.0929469	6	6	6	6	188	134	153	93	63.4796	21.1353	26.0433	34.8918	20.6628
NM_007455	Ap1g2	chr14	0	0	0	0	0.666667	0.75	NA	0.00390625	1	0.289062	NA	2	1	1	0	9	3	8	NA	2.65492	2.64245	1.86543	2.08955	0.0673675
NM_007456	Ap1m1	chr8	4	0	0	0.508333	0.503597	0.640625	0.56701	0.846502	1	0.0327658	0.222878	2	2	2	2	242	139	65	100	41.8784	61.8343	79.3295	46.2971	40.1439
NM_007457	Ap1s1	chr5	4	0	0	0.493644	0.407407	0.52	0.6125	0.81801	0.119274	0.887725	6.76089e-05	2	2	2	2	474	81	52	327	164.902	138.979	46.0203	51.1475	127.146
NM_026887	Ap1s2	chrX	0	0	0	NA	NA	1	NA	NA	NA	0.000488281	NA	0	0	3	0	NA	NA	12	NA	4.73907	0.851531	0.631233	2.7834	0.113069
NM_007459	Ap2a2	chr7	4	0	0	0.545113	0.521318	0.511688	0.566524	0.158346	0.355251	0.683535	0.0491386	15	15	15	15	271	520	389	236	53.171	13.5398	36.3583	27.8536	16.7046
NM_001035854	Ap2b1	chr11	0	0	0	0.315789	0.37931	0.111111	0.375	0.167068	0.264931	0.0390625	0.454498	1	1	1	1	19	29	9	16	1.30613	0.741436	1.59034	1.0486	0.582382
NM_009679	Ap2m1	chr16	4	0	0	0.51353	0.515666	0.537559	0.509677	0.286253	0.22982	0.00784987	0.438363	6	6	6	6	1637	1552	1291	1710	529.741	326.141	327.789	310.505	518.185
NM_198613	Ap2s1	chr7	4	0	0	0.603905	0.569069	0.571831	0.608611	2.91541e-08	0.000413589	0.00787192	1.03734e-06	4	4	4	4	727	673	362	517	156.225	127.905	157.06	129.825	155.757
NM_009680	Ap3b1	chr13	4	0	0	0.566489	0.530744	0.576316	0.573171	0.0114057	0.305837	0.00340144	0.0254471	13	13	13	12	378	312	383	247	18.7387	20.3458	20.7984	28.1963	24.4934
NM_021492	Ap3b2	chr7	1	0	0	0.882353	0.392857	0.666667	1	0.00234985	0.0629723	1	0.25	3	13	1	1	17	85	3	3	59.0715	1.38021	4.66816	0.488988	0.378363
NM_007460	Ap3d1	chr10	4	0	0	0.458629	0.507353	0.516432	0.493213	0.0981882	0.764116	0.52884	0.89302	8	8	8	8	426	551	430	226	68.6764	33.4013	53.5392	54.8228	28.428
NM_018829	Ap3m1	chr14	4	0	0	0.629016	0.616732	0.660221	0.631491	9.9303e-16	1.35012e-07	4.73143e-18	1.35384e-10	21	15	17	17	974	519	732	602	23.0459	45.3999	34.0442	49.1305	48.3896
NM_001122820	Ap3m2	chr8	0	0	0	NA	0.4	0	NA	NA	0.753906	0.125	NA	0	3	1	0	NA	10	4	NA	0.603778	0.0162922	0.231883	0.178934	0.0259599
NM_029505	Ap3m2	chr8	0	0	0	0.65	0.329268	0.785714	0.869565	0.0806905	0.00264249	0.00371917	0.000488281	3	4	3	2	42	88	29	27	1.34054	0.514253	1.72357	0.468493	0.60795
NM_009681	Ap3s1	chr18	3	0	1	NA	0.5	0.666667	0.222222	NA	1	0.387695	0.0308838	0	2	2	2	NA	36	12	18	29.7616	10.9609	13.6436	14.9204	14.9092
NM_009682	Ap3s2	chr7	4	0	0	0.652222	0.61194	0.631103	0.600858	4.67227e-20	4.27734e-08	7.3653e-10	1.54713e-05	36	34	34	34	911	612	561	471	21.0338	19.5225	19.489	19.4226	18.5775
NM_175550	Ap4e1	chr2	4	0	1	0.561983	0.712121	0.578947	0.5	0.202924	0.000756107	0.289244	1	10	10	9	10	126	66	57	50	3.271	5.43724	4.4362	4.31978	3.1868
NM_021392	Ap4m1	chr5	4	0	0	0.380734	0.412698	0.684211	0.394161	0.000522631	0.207368	0.00750818	0.0164323	5	4	4	5	222	64	60	140	10.6908	33.7066	23.3311	14.6156	31.1549
NM_021710	Ap4s1	chr12	4	0	0	0.5	0.581818	0.592593	0.666667	1	0.28061	0.442068	0.0987371	2	1	2	2	44	55	27	32	42.2912	15.7833	23.1864	16.2436	18.599
NM_001042558	Apaf1	chr10	0	0	0	0.1875	0.307692	0.4375	0.333333	0.000535053	0.266846	0.803619	0.0801433	1	1	1	1	34	13	16	33	0.0709436	0.732228	0.343301	0.594697	0.782396
NM_177034	Apba1	chr19	1	0	0	0.666667	0.564103	0.486239	0.595745	1	0.522397	0.848195	0.24296	1	10	20	13	3	39	111	49	37.4555	0.587675	1.4789	3.55455	2.08994
NM_007461	Apba2	chr7	1	0	0	0.333333	0.648221	0.875	NA	1	2.79963e-06	0.000277162	NA	1	18	6	0	3	255	24	NA	49.6765	0.0850933	16.35	2.32306	0.623703
NM_018758	Apba3	chr10	4	0	0	0.661538	0.567568	0.56	0.425926	0.0125025	0.295413	0.690038	0.340891	1	1	1	1	66	75	25	54	6.17089	21.8591	20.3466	14.1393	22.3939
NM_009685	Apbb1	chr7	4	0	0	0.504886	0.516014	0.479381	0.537217	0.909146	0.63327	0.446394	0.21067	12	12	12	12	309	285	394	310	162.624	18.124	21.982	40.7742	28.6357
NM_009686	Apbb2	chr5	2	0	0	0.583333	0.513889	0.54	0.666667	0.774414	0.906294	0.671811	1	3	9	9	1	12	72	51	3	9.10333	1.42766	7.9844	6.90434	1.87339
NM_146085	Apbb3	chr18	4	0	0	0.37037	0.382353	0.444444	0.423077	0.247789	0.229481	0.814529	0.557197	4	5	4	5	27	34	19	27	20.8253	7.75229	7.91462	6.79073	7.15834
NM_007462	Apc	chr18	4	0	0	0.539593	0.549173	0.55248	0.525887	1.38287e-06	1.06099e-12	4.77859e-06	0.0337667	58	57	57	56	3772	5330	1932	1730	96.8824	41.2486	93.1029	36.4702	29.7359
NM_011789	Apc2	chr10	0	0	0	0.666667	0.513514	0.809524	0.833333	0.6875	1	0.00719738	0.21875	2	7	6	2	6	37	21	6	13.0854	0.585142	2.33013	1.79708	0.952203
NM_133237	Apcdd1	chr18	1	0	0	0.388889	0.526316	0.474359	NA	0.480682	1	0.734342	NA	4	6	10	0	18	19	79	NA	10.1378	1.81624	2.35523	7.15572	0.514487
NM_146226	Apeh	chr9	3	1	0	1	0.645503	0.675926	0.785714	2.46519e-32	7.69589e-05	0.000325839	0.057373	10	10	10	3	107	191	110	14	12.2742	6.40477	14.6996	8.26904	2.975
NM_029943	Apex2	chrX	4	4	0	0	0.0192308	1	0.0243902	5.87747e-39	2.35367e-14	5.82077e-11	3.81988e-11	4	4	4	3	129	52	36	41	4.85845	23.1633	12.7095	9.21495	10.9818
NM_146104	Aph1a	chr3	1	0	1	0	NA	NA	0.818182	0.0078125	NA	NA	0.0654297	2	0	0	2	8	NA	NA	11	3.38065	8.91658	16.4584	10.5549	13.732
NM_177583	Aph1b	chr9	4	0	4	0.739496	0.736842	0.75	0.71875	4.27792e-20	5.75755e-16	1.19416e-17	4.47701e-11	29	30	30	27	361	294	292	226	6.57632	7.4107	6.96699	8.20514	7.7405
NM_026674	Aph1c	chr9	0	0	0	0.158537	0.26	0.1	0	2.25585e-10	0.000936223	8.43033e-06	0.000976562	8	9	4	2	84	50	31	11	4.73813	1.64498	2.86844	1.55539	1.23244
NM_007466	Api5	chr2	4	0	0	0.479266	0.539823	0.483926	0.52005	0.149783	0.0417262	0.459073	0.272462	12	12	12	12	1261	686	598	802	37.5004	61.6574	56.6796	56.0898	60.2208
NM_019735	Apip	chr2	4	0	0	0.678261	0.562874	0.558659	0.572917	6.78406e-08	0.121448	0.134724	0.184286	5	5	5	5	232	170	180	97	10.352	22.4962	28.7121	21.5804	20.2604
NM_013912	Apln	chrX	4	4	0	0	0	1	0.00869565	2.27374e-13	5.68434e-14	6.5253e-55	5.5852e-33	8	7	9	8	43	45	183	115	8.86615	3.19387	4.80115	17.1166	11.4934
NM_007467	Aplp1	chr7	4	0	0	0.653646	0.479452	0.508264	0.498141	1.77564e-09	0.463732	0.847129	1	10	9	9	10	392	368	246	272	403.803	35.4312	47.9512	36.8484	42.0191
NM_001102455	Aplp2	chr9	4	0	0	0.67313	0.680769	0.66055	0.631285	4.34477e-11	5.53573e-09	0.00103294	7.71789e-07	1	1	1	1	365	264	112	365	16.4364	21.4328	25.0983	13.5915	29.5253
NM_001102456	Aplp2	chr9	4	0	4	0.793883	0.731602	0.728972	0.765193	5.88424e-62	5.61805e-24	1.05124e-16	2.67344e-48	3	3	3	2	758	466	324	730	12.1951	10.8132	11.6053	6.20816	17.7913
NM_144897	Apoa1bp	chr3	4	0	0	0.545076	0.592075	0.630841	0.595745	0.0170895	0.000159601	6.84678e-08	9.59137e-05	7	7	7	7	728	436	433	427	62.0986	105.293	124.81	82.5519	103.628
NM_007470	Apod	chr16	1	0	0	NA	NA	0.484848	NA	NA	NA	1	NA	0	0	3	0	NA	NA	34	NA	64.346	0.182014	0.129528	5.99707	0.241684
NM_009696	Apoe	chr7	4	1	1	0.956522	0.523743	0.15109	0.332873	5.72205e-06	0.217448	1.41815e-76	1.54083e-19	2	2	2	2	23	730	658	730	1498.84	10.114	4655.26	999.793	1198.82
NM_026673	Apoo	chrX	4	4	0	0	0	0.916667	0	0.000976562	3.8147e-06	0.00634766	1.86265e-09	1	1	1	1	11	19	12	31	17.7918	7.55179	7.86461	5.58712	11.6417
NM_007471	App	chr16	4	0	0	0.515758	0.548667	0.515834	0.523432	0.165514	5.7541e-05	0.0950074	0.0167786	14	14	14	14	2013	1742	2872	2664	462.606	96.2832	140.077	267.772	209.103
NM_025825	Appbp2	chr11	4	0	0	0.386484	0.509434	0.592523	0.535948	2.87722e-12	0.714187	2.15462e-05	0.135185	8	8	8	8	954	480	543	462	38.2732	77.8341	57.8301	62.7549	58.8668
NM_145221	Appl1	chr14	4	0	0	0.592284	0.630189	0.599099	0.577997	1.20522e-08	2.17853e-09	3.45119e-05	0.000135537	37	35	36	33	975	533	451	617	33.3505	23.6699	18.3978	20.6758	23.2992
NM_145220	Appl2	chr10	4	0	0	0.553719	0.626667	0.554217	0.670807	0.275253	1.34917e-05	0.379999	1.74603e-05	7	7	5	7	123	305	84	162	7.79903	11.9491	48.4274	13.9631	23.9601
NM_009698	Aprt	chr8	4	0	0	0.497955	0.553191	0.303371	0.460581	0.923583	0.0322849	1.62521e-07	0.0918265	5	5	5	5	984	427	178	485	51.097	123.145	64.9834	60.0715	101.747
NM_007472	Aqp1	chr6	1	1	0	NA	NA	0.0666667	NA	NA	NA	0.000976562	NA	0	0	4	0	NA	NA	15	NA	2.41227	0.266052	0.233026	3.05044	0.163049
NM_175105	Aqp11	chr7	3	0	1	0.315789	0.677419	0.733333	1	0.167068	0.0707555	0.118469	0.00390625	5	6	3	3	19	32	15	9	14.8447	3.54633	4.43929	3.62001	3.60829
NM_009700	Aqp4	chr18	1	0	0	NA	0.341865	NA	0.666667	NA	1.20805e-13	NA	1	0	21	0	1	NA	552	NA	3	74.5547	0.122262	25.1844	0.296457	0.726116
NM_009702	Aqr	chr2	4	0	0	0.559494	0.634921	0.567073	0.537893	0.000925385	1.34766e-10	0.00334392	0.0853864	17	19	17	17	792	576	499	543	17.4739	34.3997	37.2922	39.0414	40.681
NM_001040111	Arap1	chr7	0	0	0	0.407407	0.733333	0.555556	0.652174	0.442068	0.118469	0.814529	0.21004	2	2	2	2	27	15	18	24	0.353645	1.27737	1.83183	1.41202	1.46484
NM_178407	Arap2	chr5	4	0	0	0.686678	0.60768	0.588727	0.65625	1.10672e-72	1.56091e-33	0.000119412	6.91786e-19	51	51	47	51	2304	3157	489	808	32.7187	28.1811	56.1949	9.05253	17.0299
NM_018790	Arc	chr15	1	0	0	0.333333	0.654286	NA	NA	1	8.20925e-09	NA	NA	1	19	0	0	3	355	NA	NA	42.4549	0.498885	15.8579	0.318893	0.765482
NM_145985	Arcn1	chr9	4	0	0	0.597107	0.594744	0.575858	0.543906	1.39043e-13	3.92805e-07	5.78767e-06	0.0168212	12	12	12	12	1464	735	917	766	53.425	93.1494	60.7725	94.7556	75.8277
NM_007477	Arf2	chr11	4	0	1	0.533923	0.703488	0.627329	0.691489	0.232087	9.63252e-08	0.00153832	1.59922e-07	10	10	10	10	341	174	161	189	32.7912	35.1145	21.3759	24.7972	24.2693
NM_007478	Arf3	chr15	4	0	0	0.509957	0.523119	0.555556	0.489459	0.51743	0.132157	0.000798795	0.505394	11	10	11	11	1163	1120	944	1100	338.81	74.4965	108.477	108.023	117.539
NM_007479	Arf4	chr14	4	0	0	0.511161	0.577519	0.52648	0.458167	0.670731	0.0150197	0.371865	0.20672	2	2	2	2	451	261	325	251	53.0928	98.3369	114.685	139.488	101.066
NM_007480	Arf5	chr6	3	2	1	0.9	1	0.818182	0.9	8.43033e-06	0.0078125	0.0654297	8.43033e-06	1	1	2	1	30	8	11	30	84.5721	79.6722	110.725	88.5283	96.5627
NM_007481	Arf6	chr12	4	0	1	0.654971	0.589744	0.714286	0.641026	6.16904e-05	0.0639959	1.64477e-06	0.00292813	6	5	6	6	173	119	126	117	15.3667	28.0229	27.193	22.2568	41.2745
NM_001177707	Arfgap1	chr2	0	0	0	1	NA	0.666667	0.5	0.0078125	NA	0.6875	1	1	0	1	1	9	NA	6	4	0.0532678	0.186282	0.0883772	0.227323	0.164901
NM_025445	Arfgap3	chr15	4	0	0	0.456	0.488889	0.52907	0.534483	0.184015	0.916129	0.492672	0.404403	11	9	11	11	253	90	173	176	11.7383	14.4341	10.9935	23.3576	16.8455
NM_001102430	Arfgef1	chr1	4	0	0	0.312187	0.472441	0.590062	0.527273	1.97848e-20	0.414728	0.00145233	0.398582	14	14	14	13	604	255	326	277	32.1288	28.9804	16.2797	24.1757	18.6345
NM_001085495	Arfgef2	chr2	4	0	0	0.456667	0.498233	0.471591	0.540107	0.148793	1	0.311199	0.30593	32	31	33	31	302	289	358	187	15.2855	6.98982	9.27057	11.8858	7.23019
NM_001081093	Arfip1	chr3	4	0	0	0.515991	0.577381	0.589744	0.592	0.518025	0.00532038	0.00180192	0.000430811	8	8	9	8	472	337	314	379	10.2698	24.2613	25.598	26.4841	29.3741
NM_029802	Arfip2	chr7	4	0	4	0.782506	0.786207	0.781065	0.794444	9.72043e-33	2.34979e-12	1.02207e-13	6.62523e-16	14	12	13	12	426	147	171	180	33.9813	26.3976	21.5218	23.9954	24.3689
NM_009705	Arg2	chr12	0	0	0	NA	NA	NA	1	NA	NA	NA	0.25	0	0	0	1	NA	NA	NA	3	6.32392	0.518576	0.510978	0.250348	0.635615
NM_176849	Arglu1	chr8	4	0	0	0.576389	0.515723	0.473684	0.387755	0.0797571	0.751191	0.731009	0.152408	2	2	2	2	145	161	76	49	65.6194	38.6354	46.0668	32.8714	18.0847
NM_030113	Arhgap10	chr8	4	0	0	0.4375	0.604651	0.452055	0.576923	0.184683	0.222053	0.482789	0.557197	11	6	10	6	128	44	73	27	11.5988	8.31098	4.49867	7.58462	3.55509
NM_181416	Arhgap11a	chr2	4	0	0	0.478261	0.485437	0.593333	0.414966	0.375701	0.843898	0.0271526	0.0473914	6	6	6	6	469	105	151	148	1.08968	33.5013	11.5077	15.4419	19.6657
NM_153820	Arhgap15	chr2	1	1	0	NA	NA	0	NA	NA	NA	2.43087e-63	NA	0	0	9	0	NA	NA	211	NA	5.11256	NA	NA	11.5378	0.169817
NM_176837	Arhgap18	chr10	4	0	0	0.431034	0.502836	0.681818	0.571661	0.000310761	0.930717	3.57357e-05	0.000437324	13	13	11	13	701	544	132	622	6.31161	50.6583	47.2892	16.4453	68.4232
NM_175535	Arhgap20	chr9	1	1	0	1	1	0.575758	0.901408	0.000244141	0.00390625	0.48685	3.22268e-24	3	3	8	19	13	9	35	142	13.7465	0.852067	0.960077	2.57626	8.40066
NM_153800	Arhgap22	chr14	0	0	0	1	NA	0.6	NA	3.05176e-05	NA	0.361595	NA	2	0	4	0	16	NA	30	NA	3.59223	0.543542	0.185667	2.7972	0.346432
NM_021493	Arhgap23	chr11	1	0	0	0.4375	0.638298	0.564103	0.454545	0.596615	0.0789407	0.522397	1	5	8	7	3	32	47	41	11	11.5654	1.36807	2.64046	3.07336	1.00737
NM_175164	Arhgap26	chr18	0	0	0	0.219512	0.623377	0.619048	0.423729	0.000430857	0.0395395	0.38331	0.297595	9	16	5	13	42	77	22	59	23.2765	1.73052	2.34088	0.76293	2.27885
NM_133715	Arhgap27	chr11	0	0	0	0.15625	NA	NA	NA	0.000113074	NA	NA	NA	6	0	0	0	32	NA	NA	NA	1.89574	1.97826	0.503606	0.45422	0.2819
NM_172964	Arhgap28	chr17	0	0	0	NA	NA	0.25	NA	NA	NA	0.289062	NA	0	0	1	0	NA	NA	8	NA	0.470606	0.255155	0.0302631	3.48622	0.0338803
NM_172525	Arhgap29	chr3	3	0	1	0.529915	0.7125	NA	0.304348	0.57929	0.000183117	NA	0.0931396	12	12	0	6	119	80	NA	24	8.79062	7.99001	6.87059	1.61925	3.66024
NM_020260	Arhgap31	chr16	4	0	0	0.358955	0.44709	0.546793	0.470657	1.69268e-24	4.61701e-06	1.91211e-05	0.0931499	56	58	58	58	1307	1908	2134	858	3.98341	16.4729	33.1278	40.7539	15.3502
NM_177379	Arhgap32	chr9	2	0	0	0.429688	0.501767	0.482051	0.679487	0.132625	1	0.667546	0.00203114	21	31	31	14	129	284	198	78	43.3701	2.53093	9.36911	7.01137	2.35791
NM_178252	Arhgap33	chr7	1	0	0	0.545455	0.571429	0.333333	NA	1	0.663624	0.6875	NA	3	5	1	0	11	21	6	NA	18.1743	1.78603	4.42568	1.97568	0.778006
NM_009706	Arhgap5	chr12	4	0	0	0.566265	0.470297	0.478814	0.408867	0.102833	0.439033	0.558068	0.0113301	5	4	5	5	166	208	239	206	51.539	12.458	25.1579	37.6086	27.4547
NM_133796	Arhgdia	chr11	4	0	1	0.295833	0.524207	0.48374	0.467714	1.59293e-28	0.252583	0.49892	0.132531	2	2	2	2	730	607	502	579	97.3838	382.927	298.299	257.663	261.048
NM_008113	Arhgdig	chr17	1	0	0	0.315789	0.333333	NA	NA	0.167068	1	NA	NA	1	1	0	0	19	3	NA	NA	64.345	9.57835	4.59616	1.63163	1.04655
NM_001003912	Arhgef11	chr3	4	0	0	0.458333	0.47619	0.524752	0.645161	0.665466	0.801306	0.690826	0.149613	4	4	4	4	49	64	102	32	17.6414	5.50728	11.6571	16.5536	5.99484
NM_027144	Arhgef12	chr9	4	0	0	0.535047	0.625526	0.585714	0.558719	0.160906	2.07308e-11	1.93061e-05	0.00605991	18	18	18	18	430	722	638	567	49.1974	16.2455	36.3509	41.4331	33.3551
NM_001081116	Arhgef17	chr7	0	0	0	NA	0.608696	0.627451	NA	NA	0.0911865	0.0919145	NA	0	15	10	0	NA	71	52	NA	19.719	0.0440858	2.25103	2.1529	0.44782
NM_133962	Arhgef18	chr8	4	0	0	0.685185	0.571429	0.644068	0.589474	0.000149097	0.0583073	0.00224267	0.100173	14	16	15	15	109	192	123	96	7.98701	4.40156	9.99613	7.82561	6.47003
NM_008487	Arhgef2	chr3	4	0	0	0.585366	0.540541	0.541401	0.555556	0.0346807	0.303327	0.338235	0.246706	10	10	10	10	165	186	159	127	24.4624	12.65	20.0424	21.3933	12.0353
NM_027871	Arhgef3	chr14	1	0	0	NA	0.652174	0.389937	0.357143	NA	0.21004	0.00682262	0.42395	0	5	17	4	NA	23	166	15	29.1141	0.189071	2.42191	12.385	2.43523
NM_183019	Arhgef4	chr1	3	1	0	0.14433	0.300866	0.6	0.611111	5.83038e-37	6.11031e-18	0.503445	0.133674	9	10	4	8	294	470	21	54	87.2101	22.3734	58.2366	2.18783	6.8978
NM_152801	Arhgef6	chrX	1	1	0	NA	NA	1	NA	NA	NA	1.20371e-35	NA	0	0	17	0	NA	NA	118	NA	7.67273	0.0494831	0.651461	5.47345	0.295674
NM_001113517	Arhgef7	chr8	0	0	0	0	0.333333	0.571429	0	0.25	1	1	0.25	1	1	1	1	3	3	7	3	10.169	0.275033	1.04386	0.988899	0.639096
NM_001033329	Arhgef9	chrX	4	4	0	0.025974	0.00549451	1	0	3.97576e-20	5.97065e-53	8.27181e-25	3.50325e-46	5	7	5	6	78	186	82	154	138.79	12.6787	43.7899	19.362	39.9734
NM_001080819	Arid1a	chr4	1	0	0	0.666667	0.363636	0.555556	0.333333	1	0.162756	1	1	1	2	2	1	3	34	9	3	14.8942	5.72104	23.6609	12.9981	5.75799
NM_001085355	Arid1b	chr17	3	0	0	0.477273	0.598425	0.36	0.491228	0.749329	0.0327896	0.000262168	1	11	11	12	10	88	129	175	57	8.27923	2.95766	6.23984	10.807	3.40144
NM_175251	Arid2	chr15	4	0	0	0.585714	0.562208	0.603261	0.561713	6.53852e-06	5.29777e-05	1.3936e-06	0.0158874	25	27	26	25	709	1085	562	402	9.25113	14.7765	20.9955	15.9697	12.0117
NM_019689	Arid3b	chr9	0	0	0	NA	0.285714	NA	NA	NA	0.453125	NA	NA	0	2	0	0	NA	7	NA	NA	2.43368	0.492211	1.88937	0.23402	0.166364
NM_001081195	Arid4a	chr12	4	0	0	0.526316	0.483871	0.481481	0.590164	0.639769	0.835846	0.891923	0.200031	8	6	9	8	114	93	55	61	14.6122	8.94182	7.16312	5.91844	6.6023
NM_194262	Arid4b	chr13	0	0	0	0.461538	0.555556	0.384615	0.4	1	1	0.581055	1	1	1	1	1	13	9	13	5	0.94769	0.70317	0.724268	1.20487	0.515988
NM_019927	Arih1	chr9	4	0	0	0.463687	0.473282	0.468354	0.409357	0.369806	0.600295	0.474106	0.0215065	8	5	5	9	183	133	164	172	28.6489	27.1408	26.0358	31.1662	38.1272
NM_011790	Arih2	chr9	4	0	0	0.533133	0.599237	0.51634	0.519481	0.249067	0.00157845	0.746528	0.687149	10	10	10	9	335	267	156	155	18.3053	26.8098	29.8787	22.41	24.709
NM_025859	Arl1	chr10	4	0	0	0.576369	0.544776	0.586873	0.604444	0.0051724	0.342015	0.00614802	0.00209547	3	3	3	3	347	134	262	227	120.196	117.062	74.7605	159.038	136.18
NM_019968	Arl10	chr13	4	0	0	0.566265	0.648438	0.618182	0.568182	0.0181446	0.000995997	0.00297703	0.0826803	5	5	5	5	332	129	168	179	15.9391	45.4793	17.6605	29.795	46.5059
NM_026577	Arl13b	chr16	4	0	0	0.496241	0.6	0.602649	0.626556	0.920261	0.00890055	0.0143596	0.000102753	15	15	15	15	400	180	152	246	4.74385	10.611	6.18238	6.11109	9.62859
NM_172595	Arl15	chr13	4	0	0	0.546512	0.666667	0.455782	0.472973	0.450548	0.00522824	0.322308	0.727547	10	13	11	9	87	77	153	74	9.63641	6.01654	4.78392	13.7114	5.91808
NM_197995	Arl16	chr11	4	0	1	0.292593	0.585586	0.45	0.323529	7.15513e-12	0.0870891	0.518958	0.000468604	7	7	5	6	273	114	62	102	17.1883	18.1489	11.9617	9.85677	11.7453
NM_019722	Arl2	chr19	4	0	0	0.62439	0.618893	0.472574	0.527197	0.000450821	3.66986e-05	0.435759	0.437686	4	4	4	4	206	313	241	242	65.0727	26	59.0233	64.2494	55.6175
NM_019718	Arl3	chr19	4	0	0	0.630769	0.462121	0.6	0.533333	0.00363401	0.433537	0.0397505	0.436368	3	3	3	2	132	135	117	166	138.259	61.1576	99.4653	95.3078	117.048
NM_001039515	Arl4a	chr12	0	0	0	0.333333	1	NA	NA	0.507812	0.25	NA	NA	1	1	0	0	9	4	NA	NA	0.314905	0.825937	0.413616	0.287972	0.316826
NM_007487	Arl4a	chr12	1	0	0	0.638298	0.604348	0.596154	0.44	0.0789407	0.00187788	0.0619264	0.355699	3	3	3	3	48	235	107	75	0.484957	0.602382	4.15489	2.18105	1.59973
NM_177305	Arl4c	chr1	4	0	0	0.384127	0.477124	0.585859	0.473856	6.54652e-09	0.45744	0.107352	0.391207	9	9	7	9	637	313	101	310	18.204	46.2823	32.4496	14.778	33.1722
NM_025404	Arl4d	chr11	3	0	3	0.3	0.789474	NA	0.7	0.115318	0.0192108	NA	0.34375	3	3	0	3	20	19	NA	10	11.3391	6.04904	6.10807	1.73143	6.90327
NM_182994	Arl5a	chr2	4	0	0	0.630561	0.603448	0.660797	0.599545	3.9903e-17	2.43172e-11	2.24953e-26	3.91487e-09	40	40	44	40	1038	1055	1104	889	30.5741	13.0158	19.3272	24.4343	17.9246
NM_029466	Arl5b	chr2	4	0	0	0.648649	0.604938	0.525424	0.511628	0.01408	0.0747882	0.794844	1	9	9	9	7	74	83	60	45	5.35524	5.0607	7.29226	6.90443	3.90664
NM_019665	Arl6	chr16	4	0	0	0.470238	0.565217	0.37931	0.561798	0.487567	0.461391	0.0869489	0.289096	5	4	4	3	171	47	59	90	22.9129	19.6716	11.9301	10.9594	16.4243
NM_019419	Arl6ip1	chr7	4	0	0	0.581032	0.6355	0.567343	0.572682	1.32361e-12	8.14055e-24	1.03213e-05	5.87437e-10	8	8	8	8	1934	1376	1095	1836	166.798	269.375	167.117	179.821	356.09
NM_144509	Arl6ip4	chr5	4	0	0	0.553073	0.491228	0.510204	0.481481	0.178339	1	1	0.891923	3	3	3	3	182	58	50	54	33.4273	61.0725	40.673	35.3144	34.7981
NM_022992	Arl6ip5	chr6	4	0	0	0.612732	0.596226	0.563218	0.601852	1.40247e-05	0.00207191	0.11112	2.67708e-05	4	4	4	4	380	270	176	434	165.105	68.3809	65.0235	65.061	124.351
NM_022989	Arl6ip6	chr2	4	0	0	0.428125	0.505882	0.484848	0.421687	0.0117658	1	0.840822	0.0520058	4	3	4	4	324	87	100	166	3.76943	23.6294	9.32102	9.5809	17.6269
NM_026823	Arl8a	chr1	4	0	1	0.280576	0.440559	0.580952	0.52518	2.33137e-07	0.0508275	0.118	0.610974	1	1	1	1	147	290	106	142	135.768	142.341	279.961	155.325	173.555
NM_026011	Arl8b	chr6	4	0	0	0.585714	0.560811	0.578035	0.595745	0.0515236	0.162072	0.0477564	0.0281953	5	4	5	4	141	149	174	141	91.5699	27.3165	43.327	54.2697	49.7967
NM_028840	Armc1	chr3	4	0	0	0.518053	0.405797	0.575758	0.558333	0.383403	0.000550687	0.00689924	0.0119806	12	9	12	12	639	350	333	482	49.7951	33.6867	21.751	32.0507	40.5336
NM_026034	Armc10	chr5	4	0	1	0.699145	0.777174	0.689459	0.66537	2.3816e-22	1.39286e-27	9.92955e-13	1.24638e-07	23	18	23	20	588	373	352	262	15.5762	19.6884	17.9229	19.2296	15.4623
NM_001034858	Armc2	chr10	0	0	0	0.8	NA	NA	NA	0.375	NA	NA	NA	1	0	0	0	5	NA	NA	NA	1.59594	0.232257	0.264453	0.0546608	0.240551
NM_001081083	Armc3	chr2	0	0	0	NA	0.333333	NA	NA	NA	1	NA	NA	0	1	0	0	NA	3	NA	NA	1.27167	NA	0.751595	NA	NA
NM_146205	Armc5	chr7	4	0	0	0.362319	0.478261	0.509804	0.489362	0.0294935	0.882996	1	1	6	5	6	5	71	47	51	47	2.601	6.11404	8.01002	8.04406	6.66689
NM_177778	Armc7	chr11	2	0	1	0.266667	0.684211	0.717949	0.514286	0.000394043	0.000424793	0.0094753	1	9	16	8	7	61	96	40	35	3.15427	3.3906	5.11174	2.7978	2.20105
NM_001166138	Armc8	chr9	0	0	0	0.466667	NA	0.666667	0.8125	1	NA	0.6875	0.0212708	1	0	1	1	15	NA	6	17	6.07269	0.887198	0.952586	1.31873	1.83528
NM_028768	Armc8	chr9	4	0	0	0.528302	0.381818	0.612245	0.608108	0.627431	0.104789	0.03336	0.0805069	13	11	14	11	108	55	98	74	8.26904	5.04177	4.70861	6.32066	5.58264
NM_030184	Armc9	chr1	0	0	0	0.357143	NA	NA	1	0.42395	NA	NA	0.00390625	2	0	0	3	14	NA	NA	9	0.986597	1.84011	0.685927	1.11703	0.383957
NM_027870	Armcx3	chrX	4	4	0	0.00169205	0	0.996974	0.00441501	1.46091e-175	1.07952e-78	4.57335e-194	8.8424e-132	9	8	9	9	600	261	668	455	56.4036	52.1797	30.59	73.8833	60.5161
NM_001009575	Armcx5	chrX	4	4	0	0	0	1	0	1.86265e-09	4.65661e-10	2.38419e-07	3.8147e-06	4	4	4	3	30	32	24	19	17.5224	4.10036	5.92136	5.86847	3.72888
NM_001007578	Armcx6	chrX	4	4	0	0	0	0.987578	0	8.55285e-50	8.27181e-25	8.9237e-45	9.18355e-41	6	6	6	6	165	82	163	135	4.77413	26.3818	12.8851	33.3318	28.4523
NM_007488	Arnt2	chr7	4	0	0	0.372115	0.598057	0.594152	0.417258	1.10178e-46	2.40459e-30	6.95466e-15	1.44011e-29	56	56	56	56	3141	3430	1725	4686	74.5381	46.989	69.1467	39.4736	105.705
NM_007489	Arntl	chr7	3	0	0	0.444444	0.456522	0.368421	0.483871	1	0.658738	0.359283	1	1	5	3	5	10	49	19	31	21.3146	2.62585	8.96956	5.15749	10.1966
NM_019767	Arpc1a	chr5	4	0	0	0.466667	0.511204	0.598575	0.505495	0.143869	0.574582	1.16919e-08	0.830587	7	7	7	7	515	721	854	548	137.44	63.1365	97.8597	172.949	110.52
NM_023142	Arpc1b	chr5	4	0	0	0.462173	0.616541	0.639946	0.53012	0.0451299	0.000172882	2.8316e-14	0.238715	6	6	6	6	728	268	747	418	12.503	89.48	48.0497	154.448	71.6658
NM_029711	Arpc2	chr1	4	0	1	0.267586	0.421853	0.527701	0.451524	4.58188e-37	3.00294e-05	0.146609	0.0101823	2	2	2	2	730	730	730	730	164.556	442.188	226.885	215.537	448.043
NM_019824	Arpc3	chr5	4	0	0	0.530936	0.521739	0.540289	0.503534	0.0347415	0.181677	0.0132875	0.835199	6	6	6	6	1209	1004	982	1147	197.344	276.097	194.727	243.819	322.758
NM_026552	Arpc4	chr6	4	0	0	0.389313	0.47561	0.548387	0.407407	0.0141179	0.740653	0.174424	0.119274	1	1	1	1	132	83	220	82	8.91027	6.71551	6.86763	14.9071	6.97513
NM_026369	Arpc5	chr1	4	0	1	0.244911	0.438356	0.534057	0.469388	5.72242e-98	0.000974588	0.0325871	0.117428	9	9	9	8	1632	734	1028	692	63.2868	122.866	68.9817	99.8006	80.884
NM_028809	Arpc5l	chr2	4	0	0	0.676471	0.388889	0.3125	0.310345	0.0576127	0.480682	0.210114	0.0614283	2	2	2	2	34	18	17	29	48.9974	53.0185	38.0147	38.4197	48.4359
NM_001177615	Arpp21	chr9	0	0	0	NA	NA	NA	1	NA	NA	NA	0.03125	0	0	0	1	NA	NA	NA	6	4.79599	NA	0.0470277	NA	0.816055
NM_145429	Arrb2	chr11	4	0	1	0.319277	0.297872	0.449275	0.371429	3.70219e-06	0.000111121	0.470369	0.175465	10	9	9	7	170	94	71	36	20.0554	12.4215	14.469	10.6676	7.29191
NM_027560	Arrdc2	chr8	1	0	1	0.722892	0.518519	0.769231	0.666667	5.9736e-05	1	0.0922852	1	10	6	3	1	83	27	13	3	4.88278	4.5265	2.39879	2.64434	2.14841
NM_001042591	Arrdc3	chr13	3	0	0	0.384615	0.615385	0.511236	0.602649	0.32694	0.00723667	0.822167	0.0143596	5	9	9	10	26	148	181	153	26.1371	2.3898	19.602	19.0077	17.961
NM_001042592	Arrdc4	chr7	3	0	0	0.574468	0.490196	0.685714	0.56338	0.381693	1	0.0409596	0.342471	9	9	7	9	47	52	35	71	1.81012	2.47474	4.09899	3.40597	3.78183
NM_009713	Arsa	chr15	4	0	0	0.309693	0.485772	0.437055	0.342618	3.38665e-15	0.557862	0.0111788	2.53122e-09	23	21	23	25	427	497	428	362	16.8395	10.7598	17.1565	15.6379	14.2314
NM_009712	Arsb	chr13	4	0	0	0.551282	0.628111	0.547174	0.546368	0.00120748	2.20619e-21	8.09552e-11	0.00093218	39	37	40	36	1026	1386	4825	1301	40.3124	19.6402	33.4756	131.613	37.4994
NM_028710	Arsg	chr11	0	0	0	NA	0.419355	0	NA	NA	0.47313	0.25	NA	0	6	1	0	NA	31	3	NA	4.84708	0.379441	1.39922	0.162363	0.549637
NM_026855	Arv1	chr8	4	0	0	0.588235	0.59375	0.5	0.625	0.629059	0.377086	1	0.454498	4	4	4	3	17	32	23	16	3.81825	4.89698	7.86686	5.17286	5.63967
NM_033474	Arvcf	chr16	2	0	1	0.783333	0.509804	0.428571	0.333333	1.21467e-05	1	0.790527	1	9	7	3	1	60	51	14	3	7.0388	3.78847	4.26146	1.95577	1.071
NM_020577	As3mt	chr19	0	0	0	NA	0.285714	NA	NA	NA	0.179565	NA	NA	0	4	0	0	NA	14	NA	NA	9.81296	NA	1.83652	0.101226	0.102802
NM_018830	Asah2	chr19	1	0	0	0.6875	0.525	0.554054	0.515152	0.00368996	0.874629	0.415985	1	14	11	15	8	64	42	76	33	8.02571	1.89924	1.96896	3.55008	2.11091
NM_010026	Asap1	chr15	4	0	0	0.591667	0.423313	0.459459	0.568	0.0547798	0.0597989	0.447806	0.152121	9	9	9	9	121	168	111	127	39.5241	8.99912	19.3177	16.4404	14.7517
NM_001008232	Asap3	chr4	0	0	0	NA	0.5	0.111111	0.5	NA	1	0.0390625	1	0	2	2	1	NA	8	9	4	0.906271	1.57858	2.27557	3.76276	1.38665
NM_023048	Asb4	chr6	0	0	0	0	1	0	NA	3.72529e-09	0.03125	0.5	NA	7	2	1	0	29	6	3	NA	1.61077	1.63351	0.391568	0.647476	0.164389
NM_029569	Asb5	chr8	0	0	0	1	0.75	NA	NA	0.125	0.625	NA	NA	1	1	0	0	4	4	NA	NA	0.607618	0.786997	1.0692	0.673515	0.855
NM_133346	Asb6	chr2	4	0	0	0.484733	0.547486	0.495238	0.435714	0.665488	0.231645	1	0.150528	10	9	9	10	265	182	105	142	12.6036	16.7076	16.7408	12.8762	14.823
NM_001170710	Asb8	chr15	0	0	0	0	0.421053	0.777778	NA	0.0078125	0.647606	0.179688	NA	1	1	1	0	8	19	9	NA	0.428735	0.442509	1.25963	0.816805	0.124428
NM_030121	Asb8	chr15	0	0	0	0.666667	0.714286	0.2	NA	1	0.453125	0.375	NA	1	1	1	0	3	7	5	NA	0.241609	0.13039	0.59386	0.450072	0.124658
NM_026937	Ascc1	chr10	4	0	0	0.573276	0.504717	0.472222	0.482558	0.0300486	0.945266	0.630634	0.703139	6	6	6	6	237	214	110	172	22.517	25.7493	31.8803	29.5207	26.0698
NM_029291	Ascc2	chr11	4	0	1	0.446701	0.555556	0.72	0.466667	0.153995	0.342833	0.000176309	0.765992	9	9	9	7	197	91	76	45	6.20773	18.2426	12.8124	11.7416	6.91267
NM_008553	Ascl1	chr10	4	0	0	0.608527	0.566381	0.52439	0.516014	0.000589914	5.57354e-05	0.483171	0.63327	6	6	6	6	261	951	248	284	3.84816	26.7047	92.4226	30.6788	39.842
NM_025541	Asf1a	chr10	4	0	0	0.514019	0.514706	0.614286	0.658537	0.846802	0.903597	0.0722379	0.00543592	3	3	3	3	108	69	70	82	10.6594	14.5742	13.3007	15.8807	17.2004
NM_138679	Ash1l	chr3	4	0	0	0.506767	0.55	0.524246	0.487719	0.756415	0.0113462	0.192443	0.586129	26	26	26	26	673	665	774	572	40.8965	15.7777	27.0072	29.7875	22.6725
NM_011791	Ash2l	chr8	1	0	0	0.491525	0.6	0.363636	0.375	1	1	0.548828	0.454498	1	1	1	1	59	5	11	16	0.599456	3.49391	0.530433	1.20601	1.44747
NM_133768	Asl	chr5	4	0	0	0.518797	0.639344	0.576087	0.308824	0.581151	0.039617	0.174984	0.00218624	7	5	7	7	266	61	92	70	12.5688	26.3399	12.6716	15.6496	12.3614
NM_012055	Asns	chr6	4	0	0	0.533025	0.546196	0.666667	0.463602	0.0109249	0.0852493	6.4331e-07	0.265169	10	10	10	10	1534	374	228	263	81.4121	129.766	45.3076	29.1579	40.6345
NM_133728	Asnsd1	chr1	4	0	1	0.28495	0.524631	0.589744	0.491892	6.65175e-64	0.345716	0.000461063	0.734206	20	20	20	20	1505	409	398	559	16.974	61.6025	22.0215	24.6509	38.1046
NM_001177856	Asph	chr4	0	0	0	0.409091	0.65	NA	0.333333	0.523467	0.263176	NA	1	6	5	0	1	22	20	NA	3	33.4927	1.74006	1.08861	0.450017	0.609364
NM_028386	Asphd2	chr5	4	0	1	0.483333	0.513158	0.560606	0.717391	0.897422	0.908777	0.389052	0.00453386	9	9	10	8	61	77	67	46	47.1483	6.26819	8.41448	9.72286	8.39877
NM_009791	Aspm	chr1	4	0	0	0.318182	0.491525	0.608696	0.641791	3.39704e-09	1	0.404873	0.02712	3	3	3	3	267	59	23	67	0.409612	65.7998	13.9748	11.9739	19.7686
NM_001164224	Aspscr1	chr11	0	0	0	0.25	0	NA	0.166667	0.289062	0.25	NA	0.21875	1	1	0	1	8	3	NA	6	0.131131	0.400344	0.310801	NA	0.34795
NM_025610	Asrgl1	chr19	4	0	4	0.826667	0.796943	0.75813	0.736842	8.39601e-09	3.90901e-39	1.55547e-31	0.000460005	11	14	13	8	75	465	499	58	43.7638	8.17218	56.1767	78.0228	7.5992
NM_007494	Ass1	chr2	2	1	1	NA	1	0.782609	0.916667	NA	0.015625	0.010622	0.00634766	0	1	2	1	NA	7	23	12	7.0946	0.0692642	1.1337	14.6166	5.13199
NM_007495	Astn1	chr1	4	0	4	0.241505	0.297611	0.710448	0.29941	4.2105e-219	2.8214e-109	2.90353e-28	1.4597e-50	47	47	45	46	3598	2955	679	1369	86.056	73.3027	81.4487	17.3436	43.5316
NM_001039939	Asxl1	chr2	4	0	0	0.548673	0.612698	0.555921	0.576389	0.162297	7.51012e-05	0.0582219	0.0797571	21	21	22	18	227	316	310	146	9.89739	7.34625	14.1418	12.7079	7.01252
NM_172421	Asxl2	chr12	4	0	0	0.529412	0.465021	0.538462	0.601036	0.244322	0.304695	0.214255	0.00608695	20	19	19	19	429	246	289	194	7.54234	9.25481	8.13735	11.4704	7.79985
NM_001167777	Asxl3	chr18	0	0	0	1	NA	0.857143	NA	0.25	NA	0.125	NA	1	0	2	0	3	NA	7	NA	1.92382	0.149699	0.0687303	0.522784	0.0538618
NM_026487	Atad1	chr19	4	0	0	0.619289	0.634675	0.604863	0.592486	2.52049e-06	1.4874e-06	0.000168862	0.000684919	11	11	11	11	396	327	330	350	62.4777	54.6175	60.9312	58.2841	87.5394
NM_027435	Atad2	chr15	4	0	0	0.468165	0.438356	0.457447	0.436364	0.327496	0.159216	0.470492	0.418754	10	10	10	8	271	146	95	55	2.75746	13.4379	7.9644	7.48534	5.93896
NM_001099628	Atad2b	chr12	4	0	0	0.50974	0.654412	0.637931	0.546729	0.775774	0.000398566	0.000338941	0.193889	17	19	17	17	311	137	176	214	8.18424	8.62993	7.67923	9.20904	9.90777
NM_179203	Atad3a	chr4	4	0	0	0.564615	0.638695	0.491935	0.505917	0.00111586	9.87307e-09	0.848966	0.870409	10	10	9	9	655	430	254	339	20.8613	70.0805	61.1099	35.1121	56.0192
NM_001029856	Atad5	chr11	4	0	0	0.413158	0.622222	0.594595	0.538462	0.000832049	0.0263017	0.130178	0.677809	15	12	11	12	381	91	74	52	2.11495	13.461	4.12361	4.10699	3.87389
NM_178662	Atcay	chr10	1	0	1	NA	NA	0.847222	0.684211	NA	NA	1.54889e-09	0.167068	0	0	10	3	NA	NA	73	19	85.0385	0.0307234	0.699647	9.49622	2.59459
NM_001029895	Ate1	chr7	0	0	0	0.333333	0.333333	NA	NA	1	1	NA	NA	1	1	0	0	3	3	NA	NA	0.32304	0.406101	0.21018	0.405466	0.235302
NM_007497	Atf1	chr15	4	0	0	0.412587	0.533088	0.417722	0.428571	0.00368735	0.302637	0.0463694	0.156066	7	8	8	7	288	276	162	114	7.14044	12.466	17.3974	13.8129	10.0476
NM_009716	Atf4	chr15	4	0	0	0.596054	0.579531	0.640152	0.653199	2.72971e-09	6.68002e-06	6.15975e-06	7.15888e-14	3	3	3	3	975	819	267	602	80.1757	446.673	204.69	111.28	231.086
NM_017406	Atf6b	chr17	4	0	0	0.480435	0.456446	0.328076	0.505929	0.428025	0.156457	9.03955e-10	0.899971	6	6	6	6	464	292	325	260	24.8792	50.9034	31.6809	51.0372	41.2306
NM_146065	Atf7	chr15	4	0	0	0.551724	0.471429	0.539683	0.459459	0.711071	0.720203	0.614655	0.742829	3	3	5	5	29	72	63	37	5.57227	6.66973	16.2534	16.644	9.55533
NM_025770	Atg10	chr13	1	0	0	0.5	0.214286	0.574468	0.538462	1	0.057373	0.381693	0.845019	8	4	11	8	32	14	48	26	4.44506	1.50954	1.64885	3.08447	2.34936
NM_026217	Atg12	chr18	4	0	0	0.579498	0.59322	0.549849	0.519324	0.000588375	0.000532774	0.0784404	0.461036	14	13	14	14	484	356	336	416	39.212	26.6105	26.357	25.1787	34.4193
NM_029846	Atg16l1	chr1	4	0	1	0.228947	0.505155	0.455696	0.31746	3.43113e-27	1	0.499897	5.10327e-05	5	5	5	5	382	97	81	129	31.3589	51.787	18.6956	19.8001	21.4293
NM_001111111	Atg16l2	chr7	4	0	0	0.636364	0.6	0.521739	0.571429	0.162756	0.607239	1	0.790527	2	2	2	2	35	15	23	15	8.39695	12.9466	8.47033	6.75732	8.23503
NM_194348	Atg2a	chr19	2	0	0	0.487179	0.511111	0.525424	0.481481	1	0.863415	0.645497	1	10	14	15	8	39	139	119	27	7.18127	2.48569	7.22783	6.82148	2.39913
NM_029654	Atg2b	chr12	4	0	0	0.452107	0.510563	0.589385	0.502326	0.137243	0.76676	0.000845177	1	23	28	33	23	263	288	365	216	12.4434	5.85782	9.27773	10.846	7.55555
NM_174875	Atg4a	chrX	4	4	0	0.00671141	0	1	0	4.2039e-43	9.09495e-13	6.61744e-24	3.38813e-21	7	7	7	7	150	41	79	71	3.59441	11.0548	5.31802	9.29898	11.2504
NM_174874	Atg4b	chr1	4	0	0	0.301402	0.453333	0.525253	0.427835	1.23322e-16	0.182297	0.522536	0.0522831	10	7	9	9	431	228	204	195	21.7365	34.8362	24.6009	24.9365	24.6567
NM_175029	Atg4c	chr4	0	0	0	NA	NA	1	NA	NA	NA	0.25	NA	0	0	1	0	NA	NA	3	NA	0.586235	0.266942	0.101315	0.362981	0.226851
NM_153583	Atg4d	chr9	4	0	0	0.5	0.581395	0.444444	0.62	1	0.360378	0.551484	0.11892	4	4	3	3	136	43	45	52	9.17632	16.761	6.89722	9.66102	11.3699
NM_053069	Atg5	chr10	4	0	0	0.61875	0.394737	0.589744	0.531532	0.00331573	0.255875	0.336784	0.56922	5	3	3	4	161	38	39	111	13.0411	19.5488	11.8266	14.8082	19.9752
NM_028835	Atg7	chr6	4	0	0	0.607143	0.678571	0.615385	0.580311	0.00675137	9.62367e-08	0.00334463	0.0305497	14	14	14	16	170	225	169	194	9.20965	9.011	11.6951	12.3997	14.211
NM_001003917	Atg9a	chr1	4	0	0	0.341289	0.457831	0.561644	0.461538	7.89238e-11	0.204904	0.0786937	0.298296	16	16	16	16	422	251	222	212	40.2195	26.2016	28.0011	23.0505	22.5964
NM_145387	Athl1	chr7	4	0	0	0.468	0.535826	0.545455	0.550162	0.165571	0.219416	0.275714	0.0877251	8	8	8	8	508	327	169	311	3.1077	28.7646	26.3205	15.5203	24.5655
NM_026195	Atic	chr1	4	0	1	0.170732	0.405864	0.487973	0.346809	1.41486e-220	1.87269e-06	0.590016	2.98001e-11	19	19	19	18	2146	653	595	476	21.0341	142.954	51.5432	53.8664	54.705
NM_178628	Atl1	chr12	1	0	1	NA	0.375	0.28	0.666667	NA	0.726562	0.0432853	1	0	1	1	1	NA	8	25	3	52.6275	1.4031	2.42494	9.52905	0.990097
NM_007499	Atm	chr9	4	0	0	0.551858	0.612903	0.49531	0.593679	0.000212897	1.07594e-07	0.862468	9.36585e-05	63	54	59	49	1309	565	539	445	7.03997	13.1911	7.73431	10.0446	8.18483
NM_177700	Atmin	chr8	4	0	0	0.571429	0.517094	0.54321	0.494382	0.069337	0.64733	0.199393	1	10	9	10	10	180	237	245	90	34.2372	8.75771	16.4052	21.3016	10.3736
NM_007881	Atn1	chr6	4	0	0	0.516949	0.529851	0.423423	0.528736	0.782556	0.251295	0.128475	0.668285	12	12	12	12	120	407	112	87	8.90197	6.02626	22.037	9.53568	5.77362
NM_153778	Atoh8	chr6	1	0	0	NA	0.25	0.35	0.222222	NA	0.625	0.263176	0.179688	0	1	1	1	NA	4	21	9	0.580484	0.287943	1.94666	10.3532	4.28222
NM_009720	Atox1	chr11	4	0	1	0.285024	0.497409	0.638298	0.475524	9.62845e-19	1	0.00129031	0.616003	2	2	2	2	422	198	146	144	71.3564	242.318	135.458	127.27	131.1
NM_009728	Atp10a	chr7	4	0	1	0.417526	0.276596	0.511278	0.456	0.0257819	1.73169e-05	0.862403	0.371161	14	13	14	14	195	96	133	125	3.52456	9.21275	6.98246	7.90788	8.42595
NM_015804	Atp11a	chr8	4	0	0	0.427451	0.541012	0.546729	0.557457	0.00120573	0.0545515	0.00689605	0.0228164	24	24	25	23	514	583	872	414	20.4527	17.5685	30.1895	40.305	22.6368
NM_029570	Atp11b	chr3	4	0	0	0.595092	0.543933	0.580537	0.5	3.01809e-05	0.195667	0.00638042	1	14	13	14	14	491	240	299	201	30.0658	14.9341	12.5615	18.4025	11.4909
NM_001128094	Atp13a3	chr16	0	0	0	0.653333	0.428571	0.408163	0.454545	0.0105821	0.663624	0.25287	0.728332	1	1	1	1	75	22	49	34	0.0362463	1.12672	0.490002	1.46089	0.610908
NM_001128096	Atp13a3	chr16	0	0	0	0.723684	0.59322	0.7	0.666667	3.2749e-08	0.0527483	3.29681e-05	0.000821453	3	3	3	2	153	121	113	106	0.906934	1.43743	1.70489	1.72178	1.45305
NM_144900	Atp1a1	chr3	4	0	0	0.373913	0.398693	0.513353	0.509434	3.26393e-06	0.000468954	0.663054	0.922685	4	4	5	4	349	309	340	107	339.559	75.2823	78.5647	99.8227	45.1249
NM_178405	Atp1a2	chr1	3	0	1	NA	0.273713	0.591928	0.574074	NA	1.40374e-18	0.00725626	0.340891	0	3	3	1	NA	375	226	54	240.213	0.489832	116.233	73.3665	22.5333
NM_144921	Atp1a3	chr7	0	0	0	NA	NA	1	NA	NA	NA	0.25	NA	0	0	1	0	NA	NA	3	NA	209.019	0.101565	1.15645	0.682944	0.161834
NM_009721	Atp1b1	chr1	3	0	1	0.166667	0.357143	0.666667	0.62069	0.000324914	0.184933	0.6875	0.264931	2	4	1	3	30	28	6	30	816.365	8.2092	20.115	3.80546	32.7757
NM_013415	Atp1b2	chr11	4	0	1	0.252688	0.513713	0.503411	0.54461	9.40036e-12	0.241489	0.882558	0.0426327	6	7	7	7	188	1919	739	540	133.941	17.3139	398.084	104.198	83.2201
NM_007502	Atp1b3	chr9	4	0	0	0.544757	0.542373	0.576642	0.590395	0.0854012	0.1622	0.00218796	0.000789202	8	8	8	8	395	297	421	354	58.4649	39.7246	43.4478	55.0627	51.1984
NM_133690	Atp1b4	chrX	0	0	0	NA	0	0	NA	NA	0.03125	0.03125	NA	0	1	1	0	NA	6	6	NA	0.0644171	NA	0.158333	0.130906	0.0443146
NR_027838	Atp2a2	chr5	0	0	0	0.5	0.25	0.894737	1	1	0.145996	0.000728607	0.25	2	2	2	1	12	12	19	3	13.0994	0.325647	0.969108	1.03735	0.408819
NM_026482	Atp2b1	chr10	4	0	0	0.386657	0.337662	0.621399	0.467391	2.39377e-17	1.27081e-08	0.000185907	0.306169	16	15	14	15	1402	311	244	277	184.887	70.4556	24.7114	17.021	22.5891
NM_007505	Atp5a1	chr18	4	0	0	0.537535	0.528598	0.529522	0.525677	0.0148351	0.0638695	0.0576376	0.098886	3	3	3	3	1095	1095	1095	1095	537.461	742.157	672.451	477.713	1143.97
NM_016774	Atp5b	chr10	4	0	0	0.523375	0.518253	0.542857	0.545455	0.0461731	0.160217	0.00048161	0.000106397	6	6	6	6	1877	1551	1703	1853	777.978	1198.36	1094.28	889.299	1881.39
NM_001112738	Atp5c1	chr2	0	0	0	NA	NA	0	1	NA	NA	0.0078125	0.25	0	0	2	1	NA	NA	8	3	1.17975	0.408173	0.22344	0.738938	0.300177
NM_020615	Atp5c1	chr2	0	0	0	0.333333	0.6	NA	NA	1	1	NA	NA	1	1	0	0	3	6	NA	NA	13.8624	25.8161	19.7531	39.8957	33.8671
NM_025313	Atp5d	chr10	4	0	0	0.474359	0.552028	0.46978	0.536388	0.395801	0.0147874	0.271005	0.176983	3	3	3	3	314	577	370	379	191.024	177.099	257.761	191.24	309.548
NM_025983	Atp5e	chr2	4	0	4	0.723058	0.712644	0.701408	0.710256	1.88559e-37	1.85232e-33	2.05576e-27	1.32532e-32	3	3	3	3	809	791	724	786	220.229	224.848	378.084	249.387	428.927
NM_009725	Atp5f1	chr3	4	0	0	0.544129	0.536295	0.542504	0.508427	0.00157787	0.0297692	0.0336768	0.602951	5	5	5	5	1336	939	662	1087	202.796	191.723	213.077	133.3	247.137
NM_001161419	Atp5g1	chr11	4	0	0	0.416667	0.30303	0.421053	0.402597	0.245061	0.035082	0.647606	0.110016	1	1	1	1	62	36	21	77	20.2612	6.31508	6.09195	3.85319	11.0687
NM_007506	Atp5g1	chr11	4	0	0	0.355172	0.48538	0.426036	0.530612	9.25827e-07	0.759794	0.0645508	0.509502	1	1	1	1	294	174	173	150	26.1954	28.2425	23.9771	27.0979	17.7074
NM_026468	Atp5g2	chr15	4	0	0	0.532213	0.580282	0.527536	0.56	0.244238	0.00290434	0.332509	0.0282689	1	1	1	1	365	365	365	365	207.02	788.781	869.794	525.302	1130.67
NM_175015	Atp5g3	chr2	4	0	0	0.560224	0.47619	0.517857	0.506964	0.026086	0.397133	0.548504	0.832837	1	1	1	1	365	365	343	365	400.222	421.682	703.89	376.551	796.507
NM_027862	Atp5h	chr11	4	0	0	0.327615	0.502501	0.489978	0.482873	1.89771e-49	0.850402	0.408881	0.151608	5	5	5	5	1825	1825	1825	1825	511.371	626.845	512.896	377.962	762.046
NM_016755	Atp5j	chr16	4	0	0	0.674074	0.64	0.56338	0.589744	6.42838e-05	0.0649086	0.342471	0.140538	2	1	1	1	137	50	72	80	39.0461	44.0403	62.0453	44.4286	35.6212
NM_020582	Atp5j2	chr5	4	0	0	0.487569	0.506241	0.473538	0.493599	0.527546	0.765776	0.167287	0.762886	2	2	2	2	730	730	730	712	393.073	712.515	568.15	487.893	1072.49
NM_138597	Atp5o	chr16	4	0	0	0.531915	0.530387	0.526181	0.523198	0.0542507	0.0485122	0.15282	0.148342	3	3	3	3	960	1095	800	1024	269.383	359.396	461.535	305.705	667.445
NM_026536	Atp5s	chr12	4	0	0	0.616667	0.547619	0.666667	0.428571	0.092461	0.445205	0.0532519	0.313503	4	5	5	5	61	85	42	63	17.8749	9.20495	10.0154	5.66951	11.9398
NM_025504	Atp5sl	chr7	4	0	1	0.284211	0.520661	0.324503	0.456	2.38648e-09	0.562989	1.92873e-05	0.184015	12	12	12	13	191	244	157	252	20.2262	7.30592	12.8886	9.83055	16.0491
NM_018794	Atp6ap1	chrX	4	4	0	0.00376223	0.00641711	0.989141	0.00934579	0	6.32919e-267	6.29963e-280	0	7	7	6	7	1346	947	1031	1505	277.906	222.121	187.965	244.008	402.115
NM_027439	Atp6ap2	chrX	4	4	0	0.0110193	0.0168067	1	0.0125523	7.65939e-101	2.14892e-32	1.94469e-62	5.15159e-66	4	4	4	4	369	121	207	241	122.782	44.2616	22.0522	36.3708	49.4142
NM_016920	Atp6v0a1	chr11	4	0	0	0.375661	0.502547	0.568878	0.617021	1.53213e-06	0.934331	0.00735264	6.60351e-06	17	17	17	17	380	598	398	381	118.082	16.1829	36.6998	25.5235	24.5933
NM_011596	Atp6v0a2	chr5	4	0	0	0.51693	0.572848	0.460222	0.585678	0.505993	0.0132161	0.0132744	0.000822672	9	9	9	9	445	306	1006	394	26.3116	38.8719	43.5101	134.944	53.9243
NM_033617	Atp6v0b	chr4	4	0	0	0.526167	0.577434	0.545139	0.532225	0.17572	0.00114903	0.140579	0.171284	2	2	2	2	714	454	293	484	247.301	253.955	190.653	160.163	280.762
NM_025272	Atp6v0e	chr17	4	1	2	0.928571	0.75	0.588235	0.733333	0.00183105	0.0226558	0.128396	0.118469	1	1	1	1	15	24	88	15	28.7814	89.6946	116.551	422.854	136.927
NM_133764	Atp6v0e2	chr6	4	0	0	0.592943	0.630805	0.591362	0.629601	1.3514e-13	1.6863e-34	2.94052e-19	2.55169e-40	16	17	16	17	1604	2201	2445	2620	257.489	83.9566	162.06	188.566	222.699
NM_007508	Atp6v1a	chr16	4	0	0	0.533193	0.557522	0.527387	0.594945	0.0440994	0.0163526	0.0535498	3.8431e-13	13	12	13	13	954	456	1296	1469	211.509	67.3782	45.5551	139.673	151.906
NM_025494	Atp6v1c1	chr15	4	0	0	0.643939	0.540936	0.646739	0.638604	1.28526e-13	0.144182	1.94293e-08	9.93507e-10	10	10	10	10	662	351	373	491	166.404	64.0773	46.4813	54.3652	82.753
NM_023721	Atp6v1d	chr12	4	0	0	0.561313	0.650456	0.687285	0.598039	0.00358845	5.24522e-08	1.4966e-10	1.09745e-05	7	7	7	7	583	332	292	512	221.165	92.6192	74.1219	79.3839	119.047
NM_007510	Atp6v1e1	chr6	4	0	0	0.592935	0.564278	0.567308	0.582888	1.5728e-10	0.000155294	1.58654e-05	3.10827e-08	7	7	7	7	1195	886	1054	1133	379.671	137.084	155.913	168.046	205.497
NM_025381	Atp6v1f	chr6	4	0	0	0.507772	0.536993	0.574074	0.614604	0.739568	0.142667	0.00460709	4.07399e-07	3	3	3	3	580	425	383	496	203.057	142.502	167.877	135.936	212.322
NM_024173	Atp6v1g1	chr4	4	0	0	0.50384	0.519313	0.572034	0.509294	0.87544	0.431015	0.00201107	0.698041	3	3	3	3	663	469	482	548	106.31	168.679	112.713	150.627	196.655
NM_023179	Atp6v1g2	chr17	3	0	0	0.673913	0.663717	0.440252	0.5	0.0258961	0.000640768	0.153215	1	9	13	16	16	47	113	163	158	367.701	2.45751	7.04926	10.203	9.15693
NM_133826	Atp6v1h	chr1	4	0	0	0.323194	0.42623	0.523649	0.456311	3.575e-16	0.123427	0.449939	0.13899	6	6	6	6	536	123	299	313	101.978	78.1813	42.7194	63.9559	64.9516
NM_007511	Atp7b	chr8	0	0	0	NA	0.75	0.666667	0.0769231	NA	0.625	0.6875	0.00341797	0	1	2	3	NA	4	6	13	1.70949	0.7194	1.97955	0.733668	0.802404
NM_001038999	Atp8a1	chr5	0	0	0	0.6	NA	NA	NA	1	NA	NA	NA	1	0	0	0	5	NA	NA	NA	2.07364	0.124386	0.196706	0.238526	0.176174
NM_001081182	Atp8b2	chr3	4	0	0	0.453488	0.394118	0.490385	0.456989	0.152029	0.00708832	0.777177	0.271352	21	19	21	20	258	172	316	189	32.0192	9.17818	9.66698	16.2334	10.7593
NM_015731	Atp9a	chr2	4	0	2	0.264237	0.309339	0.469565	0.167939	7.21371e-46	3.07798e-18	0.281568	4.77827e-15	23	23	23	17	883	519	357	132	146.785	27.4662	23.5099	18.031	7.57464
NM_015805	Atp9b	chr18	4	0	0	0.581633	0.502146	0.570776	0.558824	0.0265555	1	0.0423948	0.144831	10	10	9	10	202	234	221	173	26.5134	17.0227	23.9758	30.342	26.3778
NM_181040	Atpaf1	chr4	4	0	0	0.606061	0.461538	0.692308	0.588235	0.296206	1	0.266846	0.629059	4	2	2	2	33	13	13	17	35.2395	18.5903	10.8396	16.1397	17.9079
NM_145427	Atpaf2	chr11	4	0	1	0.3125	0.631579	0.541667	0.714286	0.00105273	0.359283	0.83882	0.0783539	2	2	2	2	81	19	24	22	16.1225	34.3584	21.2972	16.5246	19.8287
NM_025675	Atpbd4	chr2	4	0	1	0.766667	0.694444	0.569444	0.660377	3.76867e-11	0.0288167	0.288784	0.0270083	8	5	9	6	152	36	72	53	5.27632	9.28863	6.58038	8.33716	6.13354
NM_007512	Atpif1	chr4	4	0	0	0.595568	0.544444	0.595568	0.576602	0.000332165	0.102159	0.000332165	0.00430692	1	1	1	1	365	365	365	365	417.225	446.116	481.766	337.722	543.859
NM_019864	Atr	chr9	4	0	0	0.466216	0.587302	0.560976	0.621622	0.459541	0.207368	0.532709	0.187742	8	7	5	6	150	64	43	37	6.10351	12.9144	6.10372	7.40906	6.45427
NM_172774	Atrip	chr9	4	0	0	0.537634	0.540541	0.682353	0.641975	0.340507	0.561381	0.00101622	0.0139995	10	10	9	10	190	74	85	81	8.4732	11.319	9.07167	7.37953	7.91466
NM_009730	Atrn	chr2	4	0	0	0.47495	0.455245	0.497505	0.495606	0.282637	0.00429269	0.872742	0.866847	27	27	27	27	505	1048	1417	575	55.5849	13.6929	37.5607	57.2293	24.5481
NM_181415	Atrnl1	chr19	4	0	1	0.664835	0.723827	0.671412	0.671853	3.9023e-19	1.26243e-26	1.25756e-23	3.81766e-20	39	39	39	39	736	560	853	712	29.7098	11.4755	12.9979	20.0517	17.5876
NM_009530	Atrx	chrX	4	4	0	0.00475624	0.00671141	0.992293	0.00673401	2.83628e-243	4.04092e-170	3.50963e-147	1.59476e-169	12	12	12	12	852	602	522	597	50.4941	36.0683	41.2252	44.7703	39.2632
NM_009124	Atxn1	chr13	0	0	0	NA	0.432432	0.657143	0.6875	NA	0.511376	0.0895311	0.210114	0	6	8	4	NA	38	35	16	16.729	0.343215	2.11679	2.7088	1.4252
NM_016843	Atxn10	chr15	4	0	0	0.52381	0.560209	0.570787	0.563025	0.340913	0.00445964	0.00324718	0.006784	3	3	3	3	445	581	456	479	152.573	120.33	186.215	140.811	220.313
NM_009125	Atxn2	chr5	4	0	0	0.695652	0.636364	0.54717	0.6	0.0931396	0.0961418	0.583132	0.503445	4	4	4	4	23	44	54	20	14.2247	3.9787	17.5996	8.898	4.68933
NM_183020	Atxn2l	chr7	4	0	0	0.416667	0.625	0.604396	0.464286	0.125346	0.00195373	0.0585735	0.850554	4	4	4	4	97	163	92	28	22.075	14.2048	40.8888	15.9465	7.98843
NM_029705	Atxn3	chr12	4	0	3	0.820896	0.741497	0.666667	0.774194	6.2275e-21	3.88161e-09	9.33449e-05	1.03872e-07	14	14	13	13	203	149	141	94	6.06649	4.45934	4.93646	5.92145	4.56902
NM_139227	Atxn7	chr14	4	0	0	0.496296	0.528662	0.555556	0.647727	1	0.523301	0.31488	0.00734341	15	14	14	12	135	158	101	88	7.59087	5.449	9.85563	6.77738	7.11933
NM_001033436	Atxn7l1	chr12	0	0	0	NA	0	NA	NA	NA	0.25	NA	NA	0	1	0	0	NA	3	NA	NA	4.3718	0.396077	0.689	0.207145	0.0350616
NM_028139	Atxn7l1	chr12	1	0	1	0.566667	0.773585	NA	NA	0.584665	8.17133e-05	NA	NA	7	7	0	0	30	53	NA	NA	8.81893	2.47596	4.27577	0.310777	0.105205
NM_175183	Atxn7l2	chr3	3	0	1	0.2	0.422222	0.307692	0.333333	0.0351562	0.371298	0.266846	0.6875	4	5	4	2	16	47	13	6	6.1604	3.37671	7.12891	4.41498	3.55708
NM_001012400	AU022252	chr4	4	0	0	0.482955	0.478571	0.55	0.394495	0.706371	0.672757	0.315303	0.0346154	8	5	7	6	177	141	126	109	13.8201	16.3158	16.4148	14.2006	16.7369
NM_177682	AU022870	chr5	4	0	0	0.462396	0.54	0.551111	0.52381	0.169905	0.28882	0.142297	0.510657	6	5	6	6	361	202	227	233	30.9143	44.8303	38.1746	39.9281	44.569
NM_133886	AU040320	chr4	4	0	0	0.510823	0.454874	0.446237	0.390805	0.79248	0.149165	0.163398	0.00488778	6	6	6	6	234	279	187	175	5.59057	6.67408	11.6446	7.68177	8.90997
NM_001163064	AU041133	chr10	0	0	0	NA	0.75	0.8	NA	NA	0.625	0.375	NA	0	1	1	0	NA	4	5	NA	3.09059	0.750559	1.67869	2.11969	1.81099
NM_016709	Auh	chr13	4	0	0	0.622642	0.635714	0.639175	0.576613	2.66722e-06	6.53625e-06	2.37383e-06	0.0186178	13	14	13	12	377	287	295	251	52.1163	18.4363	21.1594	25.2362	22.6179
NM_007517	Aup1	chr6	4	0	2	0.690265	0.724138	0.5	0.7	6.44538e-05	0.0241195	1	0.0427739	2	2	2	2	116	30	36	31	40.9647	99.1009	97.26	76.2477	68.6787
NM_011497	Aurka	chr2	4	0	0	0.478261	0.666667	0.588235	0.666667	0.670534	0.189247	0.629059	0.0987371	1	1	1	1	141	21	18	30	1.32777	79.1085	16.3742	11.4908	27.5915
NM_177047	Auts2	chr5	0	0	0	NA	NA	0.8	NA	NA	NA	0.375	NA	0	0	2	0	NA	NA	6	NA	6.48746	0.307642	0.636888	0.994617	0.252525
NM_145425	AV249152	chr11	4	0	0	0.353982	0.425	0.527778	0.48	0.00245581	0.429591	0.867939	1	6	5	5	5	114	40	37	26	4.99833	12.1155	6.02213	7.65433	5.67354
NM_028844	Aven	chr2	1	0	0	0.304348	0	0.125	0.375	0.0931396	0.25	0.0703125	0.726562	1	1	1	1	23	3	8	8	0.514031	3.31559	0.170567	1.37886	2.60971
NM_030235	Avl9	chr6	4	0	0	0.649351	0.623153	0.584302	0.659847	1.35483e-10	7.92762e-07	0.0020729	2.5466e-10	28	25	26	29	467	410	350	394	19.9791	12.0044	13.0485	13.9074	15.7919
NM_027106	Avpi1	chr19	4	0	3	0.595745	0.736842	0.777778	0.785714	0.24296	0.0635681	0.0308838	0.057373	3	4	3	3	48	19	19	14	11.7963	8.97045	4.20091	4.54013	5.53297
NR_030671	AW011738	chr4	0	0	0	0.428571	0.5	NA	NA	1	1	NA	NA	2	1	0	0	7	4	NA	NA	1.45103	0.47328	0.907908	0.581137	0.196728
NM_177884	AW146020	chr6	1	0	0	0.528736	0.181818	0.5	0.5	0.668285	0.0654297	1	1	11	3	5	8	88	11	29	32	4.21244	3.86608	1.47686	2.28451	2.80009
NM_001033530	AW146154	chr7	3	0	0	0.485075	0.508772	0.540984	0.5	0.795629	1	0.608921	1	9	6	9	10	134	57	61	120	4.41516	4.37174	2.45117	4.36491	5.72579
NM_145930	AW549877	chr15	4	0	0	0.616228	0.608498	0.619608	0.553922	7.88014e-07	2.81462e-08	7.33623e-08	0.0331421	24	24	25	22	463	665	519	411	28.0385	12.6324	20.5254	20.9182	19.0132
NM_001033532	AW554918	chr18	4	0	0	0.662651	0.490566	0.577778	0.6875	0.00403921	1	0.371298	0.0132833	10	9	9	10	83	54	47	49	5.12904	6.00634	3.6809	4.53799	4.37316
NM_001024602	AW555464	chr12	3	0	0	0.583333	0.568966	0.669856	0.646667	0.312327	0.358143	1.02281e-06	0.000409773	12	13	29	26	49	60	215	152	29.4414	1.67583	3.52328	8.3685	6.3707
NM_015732	Axin2	chr11	4	0	0	0.553191	0.606452	0.565217	0.697872	0.0839993	0.00993267	0.461391	1.19869e-09	18	16	10	18	286	156	46	239	5.23707	9.36551	7.91099	3.91291	11.6044
NM_009465	Axl	chr7	4	0	3	0.722892	0.608173	0.742169	0.727829	8.35007e-09	1.18886e-05	1.20108e-23	7.8542e-17	15	13	15	13	166	419	422	332	11.1805	8.74906	27.7543	32.876	24.8224
NM_009734	Azi1	chr11	2	0	0	0.375	0.518519	0.176471	0.333333	0.0599412	0.891923	0.0127258	1	11	9	4	1	65	60	18	3	5.48482	3.39415	4.74094	2.69982	0.8301
NM_001048146	Azi2	chr9	0	0	0	0	0.25	0.428571	0.75	0.00390625	0.145996	1	0.625	2	2	1	1	9	13	7	4	1.60079	1.02939	1.5898	1.13399	1.43084
NM_013727	Azi2	chr9	4	0	0	0.479167	0.467105	0.641026	0.521127	0.759649	0.465509	0.0168531	0.812589	5	5	4	4	96	155	79	71	14.755	6.91386	10.2581	8.31483	7.22311
NM_001039518	B020018G12Rik	chr1	0	0	0	NA	0	0	NA	NA	0.5	0.25	NA	0	1	1	0	NA	3	3	NA	3.49057	1.26364	1.73857	1.45392	1.74502
NM_026592	B230118H07Rik	chr2	4	0	0	0.587413	0.517647	0.520833	0.524752	0.00368735	0.616473	0.759649	0.690826	6	7	7	6	286	259	97	101	12.288	17.5255	17.8928	8.71001	10.3133
NM_001164791	B230120H23Rik	chr2	4	0	0	0.399015	0.481481	0.578704	0.447154	0.00487028	0.63397	0.0245193	0.110763	14	14	14	14	205	217	220	247	3.76952	8.94535	14.5471	16.129	15.1687
NR_028380	B230206F22Rik	chrX	0	0	0	0.333333	0	NA	0.2	1	0.25	NA	0.375	1	1	0	1	3	3	NA	5	14.6466	1.11186	1.8953	1.09537	1.56563
NM_001024616	B230208H17Rik	chr2	4	0	0	0.552326	0.59009	0.630841	0.543726	0.0195499	0.00870775	0.000157189	0.174801	5	5	5	5	520	223	220	266	64.5425	70.4674	56.4413	55.056	59.9354
NM_001080935	B230217C12Rik	chr11	3	0	1	0.371859	0.755556	0.583333	1	0.000368082	0.000824082	0.312327	7.62939e-06	7	5	6	3	199	45	48	18	33.8907	12.3041	4.39495	4.84484	1.36254
NM_181278	B230219D22Rik	chr13	4	0	0	0.558125	0.546429	0.538986	0.578223	2.69965e-06	0.00785234	0.0136112	1.10658e-05	21	20	19	20	1655	855	1042	805	44.6416	58.1848	39.1427	50.9984	46.7621
NM_172691	B230312A22Rik	chr4	4	0	0	0.46	0.482759	0.447368	0.59375	0.671811	0.895683	0.627103	0.168643	6	5	5	6	50	58	38	64	10.6927	5.32229	10.1001	6.61457	10.5779
NM_001105557	B230315N10Rik	chr10	2	0	0	0.333333	0.533333	0.307692	0.2	1	1	0.266846	0.375	1	2	2	1	3	15	13	5	9.30412	2.92451	3.44885	5.94318	4.52678
NM_020026	B3galnt1	chr3	4	0	2	0.15534	0.532258	0.406417	0.159574	2.34806e-48	0.703537	0.0126979	1.18177e-32	13	10	15	13	418	64	189	282	43.4804	29.0596	5.6669	17.0161	26.9394
NM_178640	B3galnt2	chr13	4	0	0	0.628571	0.52381	0.519231	0.512821	0.0108179	1	0.889884	1	8	5	8	5	106	23	52	39	7.01368	10.2351	4.43356	8.61917	5.69701
NM_020283	B3galt1	chr2	4	0	0	0.505882	0.586207	0.4625	0.533333	0.938895	0.132902	0.576431	0.46255	15	9	17	17	171	89	80	151	19.5168	5.69729	4.40979	4.0599	8.22812
NM_020025	B3galt2	chr1	3	0	2	0.333333	0.704225	0.58209	0.740741	0.00171276	0.000766765	0.221549	0.000535436	8	9	9	6	94	73	70	54	22.2085	2.77613	3.89852	4.39439	4.2662
NM_019420	B3galt4	chr17	4	4	0	0.039801	0.0390625	0.00540541	0	3.72365e-47	1.61974e-30	7.58567e-54	8.67362e-19	3	3	4	2	207	129	187	62	4.95929	8.34558	11.0624	13.2064	5.07943
NM_001081204	B3galtl	chr5	4	0	0	0.527643	0.515275	0.570397	0.592275	0.0811003	0.527553	0.00105205	7.88441e-05	39	37	35	30	1036	494	564	467	9.15789	19.4707	12.759	15.6647	14.3632
NM_029792	B3gat1	chr9	2	0	2	0.806452	0.714286	0.745763	NA	0.00087791	0.0079159	0.000203722	NA	5	7	7	0	31	42	60	NA	71.8608	2.83579	9.12819	11.0973	1.73386
NM_172124	B3gat2	chr1	4	1	1	0.0769231	0.20339	0.534846	0.417085	7.11655e-18	5.56043e-11	0.0907831	0.0230629	10	11	15	12	94	118	624	199	5.40749	3.48896	5.59341	28.2862	9.5273
NM_024256	B3gat3	chr19	4	0	0	0.588571	0.571429	0.5	0.561538	0.00108254	0.171565	1	0.188107	3	3	3	3	354	106	103	131	86.4315	60.8354	30.2492	35.2479	45.4561
NM_175383	B3gnt1	chr19	4	0	0	0.541463	0.507389	0.534591	0.542373	0.263738	0.888411	0.42784	0.292637	7	7	7	7	207	207	165	179	39.4458	16.9594	29.2736	27.8282	27.7307
NM_016888	B3gnt2	chr11	0	0	0	0.52	0.2	NA	0.666667	1	0.375	NA	1	1	1	0	1	26	5	NA	3	0.290844	1.23476	0.208506	0.0656712	0.200081
NM_178664	B3gntl1	chr11	4	0	0	0.35	0.547445	0.581081	0.494382	2.65288e-05	0.305243	0.200678	1	13	13	11	11	203	139	74	91	8.60986	9.45379	8.46251	5.93932	6.41074
NR_033214	B430212C06Rik	chr18	0	0	0	0.5	0.333333	NA	NA	1	1	NA	NA	2	1	0	0	16	3	NA	NA	0.476616	1.8089	0.551692	0.371657	0.514695
NR_029474	B430319G15Rik	chr9	0	0	0	NA	0.272727	0	0.333333	NA	0.226562	0.25	1	0	2	1	1	NA	11	3	3	0.578757	1.05501	2.8451	1.41571	1.21656
NM_177897	B4galnt4	chr7	4	0	0	0.447205	0.426829	0.569231	0.365854	0.20718	0.224245	0.321084	0.117275	9	8	8	8	161	82	65	41	34.7947	13.2617	10.046	9.4189	6.02919
NM_022305	B4galt1	chr4	2	0	0	0.601942	0.25	0.671429	0.285714	0.00417013	0.00700037	0.00558267	0.0166738	19	6	12	8	207	32	70	35	2.1425	4.84441	1.41538	3.67778	2.28629
NM_017377	B4galt2	chr4	4	0	0	0.448598	0.555556	0.466667	0.472973	0.333705	0.267182	0.765992	0.727547	3	3	3	3	108	118	46	74	22.4758	26.7399	30.7408	18.4172	26.7465
NM_019804	B4galt4	chr16	4	0	0	0.672727	0.649533	0.46831	0.596215	1.08541e-11	6.24645e-10	0.313086	0.000726891	20	20	20	20	388	436	288	321	11.2502	11.5426	16.1836	13.9485	15.1831
NM_019835	B4galt5	chr2	4	0	0	0.357143	0.444444	0.577982	0.443787	0.000263652	0.267182	0.125005	0.165979	18	14	17	16	169	118	110	171	14.8203	5.19973	4.49394	4.5956	7.68579
NM_019737	B4galt6	chr18	4	0	1	0.525424	0.703704	0.566667	0.548387	0.794844	0.052239	0.584665	0.7201	3	3	3	4	59	28	31	31	36.2168	7.43018	6.74101	11.7035	8.69347
NM_146045	B4galt7	chr13	4	0	0	0.584071	0.673684	0.542553	0.435897	0.0899543	0.000924644	0.470492	0.308168	6	6	6	6	113	95	94	78	12.5512	13.9797	12.7945	17.0472	17.5946
NM_175312	B630005N14Rik	chr6	4	0	2	0.610465	0.724409	0.719298	0.666667	0.00464181	4.36091e-07	3.13852e-06	2.23744e-07	16	15	17	17	172	128	116	243	58.3719	8.21152	5.99896	7.36209	14.4535
NM_175327	B630019K06Rik	chrX	1	1	0	NA	NA	1	NA	NA	NA	0.000976562	NA	0	0	2	0	NA	NA	11	NA	10.0273	0.882577	0.643396	4.08667	1.2691
NM_178699	B930041F14Rik	chr4	4	0	0	0.522727	0.452055	0.395833	0.413462	0.880396	0.482789	0.193413	0.0950437	3	3	2	3	46	73	49	104	12.4704	7.69228	18.7399	20.482	37.2179
NR_033340	B930059L03Rik	chr12	0	0	0	1	NA	NA	NA	0.125	NA	NA	NA	1	0	0	0	4	NA	NA	NA	0.690108	0.865006	0.0615573	0.339293	0.206745
NM_013717	B9d1	chr11	2	0	1	0.285714	0.666667	NA	1	0.179565	0.0652453	NA	0.125	2	2	0	1	14	36	NA	4	19.5182	5.68447	14.3377	1.35475	1.60515
NM_172148	B9d2	chr7	4	1	0	0.692308	0.9	0.592593	0.681818	0.000901004	0.000402451	0.442068	0.0226288	2	2	2	2	79	20	30	45	13.5259	22.0739	12.9921	9.28766	17.8067
NM_019517	Bace2	chr16	1	0	0	0.727273	0.8	0.888889	0.571429	0.226562	0.109375	0.0390625	0.49956	3	2	2	3	11	10	10	35	1.57975	1.63286	2.45313	1.61306	5.51678
NM_007520	Bach1	chr16	4	0	0	0.554348	0.620802	0.575893	0.494781	0.00650377	2.09596e-13	9.49813e-05	0.855007	37	36	37	37	654	937	681	485	4.35756	9.71949	20.2974	17.6097	11.9072
NM_001109661	Bach2	chr4	1	0	0	0.666667	0.683544	0.833333	0.25	1	0.00146607	0.21875	0.0413895	1	13	2	5	3	79	6	20	2.32096	0.591918	3.10481	0.960008	0.826591
NM_007522	Bad	chr19	4	0	0	0.629412	0.625	0.512605	0.582353	2.10133e-06	0.0246228	0.85463	0.0380637	4	4	4	4	340	90	123	170	14.8171	38.279	13.3436	18.921	29.0092
NM_145392	Bag2	chr1	4	0	1	0.439189	0.642336	0.80625	0.492754	0.0010555	2.84357e-06	2.06347e-15	1	13	13	11	9	745	279	163	69	7.38453	43.1651	19.8881	12.6954	8.72757
NM_013863	Bag3	chr7	2	0	0	0.529412	0.405797	NA	0.538462	1	0.148032	NA	0.845019	4	6	0	5	18	69	NA	26	1.91879	2.57245	11.2011	0.0342043	3.05684
NM_026121	Bag4	chr8	4	0	0	0.45	0.473684	0.545455	0.495146	0.178964	0.731009	0.390927	1	10	8	10	9	202	76	113	103	23.4492	10.9155	6.1171	9.23737	8.49935
NM_198423	Bahcc1	chr11	2	0	0	0.315789	0.569231	0.644444	0.625	0.00750818	0.321084	0.0724543	0.726562	6	5	5	2	57	66	45	8	1.0245	2.6855	5.14874	4.18042	1.45153
NM_174991	Bai1	chr15	1	0	0	NA	0.666667	1	NA	NA	0.237885	0.00195312	NA	0	3	3	0	NA	18	11	NA	42.8937	0.0362839	3.61495	1.29512	0.187898
NM_173071	Bai2	chr4	4	0	1	0.58	0.53125	0.827586	0.53125	0.322236	0.707981	0.000546113	0.86005	2	2	2	2	50	65	29	32	50.3832	23.4837	48.0567	19.6381	32.7989
NM_175642	Bai3	chr1	4	0	1	0.209596	0.410042	0.566265	0.432653	1.64457e-32	0.00647186	0.0181446	0.0406947	16	13	13	13	396	240	336	246	35.1916	21.3685	28.6372	27.5243	24.2529
NM_001037755	Baiap2	chr11	4	0	3	0.60396	0.745098	0.75	0.804598	0.0460441	7.43905e-07	0.000234446	8.35092e-09	2	2	2	2	102	102	57	87	1.40792	7.41279	7.66953	5.53628	9.50153
NM_007523	Bak1	chr17	4	0	1	0.642857	0.411765	0.290323	0.333333	0.184933	0.391528	0.001299	0.189247	1	1	1	1	29	36	62	22	9.04738	50.4471	65.6563	53.6078	70.7167
NM_026505	Bambi	chr18	2	0	0	0.40099	0.535354	0.5	0.492754	0.00593194	0.546713	1	1	9	9	4	9	205	102	20	69	2.9189	3.19409	3.20618	1.19571	1.57148
NM_027088	Bap1	chr14	4	0	0	0.575139	0.536885	0.615635	0.605263	0.000557101	0.113015	6.02964e-05	0.000288484	11	11	11	11	549	496	313	310	52.9317	47.8944	60.0947	45.6907	45.0279
NM_027395	Basp1	chr15	4	1	0	0.507772	0.56492	0.612903	0.135135	0.799154	0.00745358	0.281042	8.95742e-11	7	6	5	6	389	445	31	77	188.414	27.7855	46.4844	3.63289	8.39834
NM_019693	Bat1a	chr17	4	0	0	0.614845	0.611389	0.402357	0.630551	4.09766e-13	1.8488e-12	2.21468e-06	6.10939e-10	3	3	3	3	1014	1033	609	568	129.852	247.467	288.622	293.88	232.495
NM_020027	Bat2	chr17	4	0	0	0.555556	0.473251	0.333333	0.376623	0.267182	0.441483	3.86963e-08	0.0395395	5	5	5	5	119	246	281	78	16.3872	11.6636	37.6176	37.3519	10.8802
NM_001159634	Bat2l	chr2	1	0	0	0.43617	0.636364	0.528302	0.507937	0.256442	0.00139827	0.525925	1	13	15	16	10	96	147	159	63	3.4774	1.20001	2.70864	3.2762	1.12872
NM_001081290	Bat2l2	chr1	4	0	1	0.26601	0.415948	0.537594	0.475676	1.15381e-21	3.4035e-07	0.0907686	0.556535	15	15	15	13	408	935	534	186	31.1614	22.5853	81.433	43.2255	14.4691
NM_057171	Bat3	chr17	4	0	0	0.491803	0.523256	0.430233	0.553846	1	0.746534	0.23538	0.457021	3	2	3	3	61	89	87	66	30.6653	32.1269	71.1793	70.2199	45.6083
NM_001128597	Bat4	chr17	0	0	0	0.857143	NA	0.333333	NA	0.125	NA	1	NA	1	0	1	0	7	NA	3	NA	0.540545	1.23772	0.266912	1.17694	1.01597
NM_178592	Bat5	chr17	4	0	0	0.576988	0.695082	0.444444	0.575301	0.000208249	7.70567e-12	0.0396843	0.0070714	7	7	7	7	595	309	368	338	50.0305	39.3507	29.6362	54.5865	32.7157
NM_013815	Baz1a	chr12	4	0	0	0.673267	0.46875	0.5625	0.655172	0.000641249	0.86005	0.470879	0.136046	3	3	3	3	101	33	48	30	1.10102	14.8	8.32692	10.7283	7.4869
NM_011714	Baz1b	chr5	4	0	0	0.501734	0.515571	0.490854	0.545455	0.945789	0.638011	0.782538	0.0929053	12	12	12	12	871	294	330	367	33.9501	56.2127	28.4309	37.9676	34.5434
NM_054078	Baz2a	chr10	4	0	0	0.528351	0.51357	0.509363	0.579882	0.286359	0.583536	0.80667	0.0451796	21	20	20	21	390	485	276	174	11.339	11.4401	17.781	13.9146	10.9049
NM_001001182	Baz2b	chr2	3	0	0	0.414062	0.570248	0.590361	0.2	0.0630088	0.145487	0.123853	0.109375	14	15	13	2	129	125	83	10	8.82045	4.10542	7.90841	5.24188	1.66923
NM_001033128	Bbs1	chr19	0	0	0	0.785714	0.537037	0	0.888889	0.000271539	0.683489	0.0078125	0.0390625	8	13	2	3	42	55	8	9	7.2593	1.47396	2.64387	1.63149	0.933007
NM_027914	Bbs10	chr10	3	0	1	0.572115	0.697674	0.69697	0.705128	0.044088	0.0137182	0.00011094	0.000377792	21	9	16	12	209	45	103	78	4.13979	5.9501	1.86894	3.92737	4.57698
NM_175325	Bbs4	chr9	4	0	0	0.387097	0.453125	0.482143	0.625	0.0375142	0.532309	0.893853	0.454498	8	9	7	4	94	66	56	16	35.57	7.33282	6.515	6.79841	4.67364
NM_028284	Bbs5	chr2	1	0	0	0.454545	0.5	1	0	0.728332	1	0.0625	0.03125	2	1	1	1	33	6	5	6	14.6495	5.41364	1.81297	1.06173	1.45882
NM_027444	Bbx	chr16	4	0	0	0.612987	0.547872	0.395745	0.598039	1.07971e-05	0.214922	0.00168315	0.0594005	25	22	25	20	387	192	238	102	9.0936	7.76094	7.06354	9.67242	4.59231
NR_002445	BC002163	chr16	4	4	0	0.113924	0.0506329	0.0172414	0.109375	7.77884e-13	5.24347e-18	4.09395e-16	7.63814e-11	3	3	3	2	79	79	59	65	52.0417	36.1503	27.3339	30.4864	37.0812
NM_183155	BC002230	chr12	4	0	0	0.385906	0.435374	0.462963	0.39521	9.749e-05	0.137378	0.307427	0.00831786	19	16	21	20	302	148	223	168	8.74246	8.14979	7.00302	10.7075	8.37407
NM_030252	BC003266	chr4	4	0	0	0.646552	0.537143	0.625	0.61326	9.48161e-06	0.364388	0.000499426	0.00284416	8	8	8	8	235	176	202	182	24.1806	19.2889	18.4859	22.9796	24.7464
NM_145591	BC003267	chr8	2	0	1	0.5	0.375	0.35	0.722222	1	0.726562	0.263176	0.0962524	2	2	3	3	8	8	20	18	7.12986	3.89964	2.82621	5.7806	8.31032
NM_145511	BC003331	chr1	1	0	0	0.333333	0.6	0.6	NA	0.189247	0.607239	1	NA	1	1	1	0	22	15	5	NA	2.17021	4.05953	2.35577	2.62426	2.44302
NM_030561	BC004004	chr17	4	0	0	0.549472	0.463138	0.345528	0.496172	0.00155804	0.0984073	3.6619e-17	0.875629	8	6	8	8	1045	534	755	657	28.9183	51.317	34.8593	59.1874	55.1104
NM_024473	BC005537	chr13	4	0	0	0.430769	0.482353	0.510204	0.508772	0.321084	0.828423	1	1	1	1	1	1	65	87	50	57	66.9912	25.5079	43.5847	54.0911	38.986
NM_001166581	BC005561	chr5	4	0	0	0.637306	0.606838	0.585366	0.402778	0.000166789	0.0260756	0.150675	0.124918	17	15	13	13	194	117	84	72	17.4868	6.19491	5.66591	6.74215	4.77907
NM_144885	BC005624	chr2	4	0	0	0.415808	0.513725	0.496933	0.443515	0.00481079	0.707193	1	0.0923994	4	4	4	4	292	257	165	241	86.2575	59.8451	62.5352	62.1965	66.7568
NM_001170935	BC005764	chr10	0	0	0	1	0.777778	NA	NA	0.0625	0.179688	NA	NA	1	2	0	0	5	9	NA	NA	0.706844	0.30718	1.26017	0.340205	0.115167
NM_183162	BC006779	chr2	0	0	0	0	NA	1	NA	0.00390625	NA	0.03125	NA	2	0	1	0	9	NA	6	NA	0.790903	1.1231	1.00204	0.990646	0.115742
NM_144857	BC011248	chr17	4	0	0	0.561644	0.628664	0.501894	0.497917	0.00053558	7.64176e-06	0.965293	0.963601	15	15	15	15	811	311	538	486	11.1485	36.1938	18.4026	36.9449	38.272
NM_145490	BC011426	chr17	0	0	0	0.25	NA	1	NA	0.625	NA	0.125	NA	1	0	1	0	4	NA	4	NA	3.42042	1.18077	1.95415	2.58503	0.918845
NM_145418	BC013529	chr10	4	0	0	0.571429	0.551136	0.549738	0.526846	0.0350251	0.199909	0.0582045	0.38492	10	10	10	10	231	177	386	298	10.8863	16.7967	16.3163	37.396	32.8913
NM_134063	BC016423	chr13	4	0	0	0.572539	0.571429	0.452107	0.56872	0.00505375	0.0380956	0.137243	0.0536469	20	19	20	20	390	226	265	217	10.9627	13.3049	11.792	15.2843	11.8953
NM_145497	BC016495	chr19	4	2	2	0.833333	0.875	0.864407	0.725	0.00753784	0.000277162	9.05239e-09	0.00642658	3	5	7	4	19	24	61	40	9.98847	5.68314	9.56834	12.8857	5.74252
NM_145590	BC017158	chr7	4	0	3	0.764045	0.726708	0.64557	0.753247	9.07787e-13	7.76802e-09	0.0128124	9.77507e-06	12	12	8	12	181	161	81	77	5.43936	7.81662	8.45269	7.29678	5.28816
NM_133214	BC017612	chr9	0	0	0	0.153846	0.555556	0.375	0.333333	0.0224609	1	0.726562	1	2	2	2	1	13	9	8	3	1.72288	2.51044	1.53131	2.81344	0.952413
NM_144832	BC017643	chr11	4	0	1	0.467532	0.688073	0.748428	0.625899	0.221222	0.000107301	2.63901e-10	0.0037703	14	12	12	13	391	113	162	140	12.2815	21.7653	7.38864	13.0394	12.2938
NM_145430	BC017647	chr11	4	0	2	0.24	0.346154	0.636364	0.846154	0.000305864	0.168638	0.286279	0.0224609	1	1	1	1	50	26	22	14	7.6801	17.2625	20.5745	13.6449	10.4509
NM_144935	BC018242	chr9	4	0	0	0.573034	0.592105	0.586207	0.583333	0.203117	0.135385	0.458258	0.405032	6	6	5	5	91	76	29	37	41.3808	10.5909	14.3648	7.50988	8.42053
NM_144837	BC018507	chr13	4	0	0	0.585502	0.571168	0.599424	0.576132	8.41978e-05	0.00098694	0.000250852	0.0207305	21	21	21	21	545	554	349	245	31.282	19.8341	23.9034	19.6877	15.0924
NR_033219	BC020402	chr10	0	0	0	0.533333	0.72	0.617647	0.826087	0.855536	0.0432853	0.229481	0.00259948	4	6	6	5	30	25	35	23	3.69399	1.13589	1.76367	2.79479	1.85107
NM_001113385	BC021785	chr10	0	0	0	0	NA	1	NA	0.00012207	NA	0.25	NA	4	0	1	0	15	NA	3	NA	0.425747	0.254508	0.203758	0.349402	0.329496
NM_145450	BC022687	chr12	4	0	0	0.431138	0.5	0.524138	0.457746	0.0883758	1	0.618445	0.356	15	11	14	15	170	109	147	142	7.25701	6.78409	9.06792	10.0887	9.39979
NM_153562	BC023814	chr3	4	0	0	0.660377	0.64	0.645161	0.52	0.0270083	0.229523	0.149613	1	6	6	6	5	54	26	32	25	11.1696	8.87478	8.13828	6.41701	8.2885
NM_001033328	BC023829	chrX	4	4	0	0	0	1	0.0113636	6.07716e-64	1.35525e-20	9.86076e-32	5.75149e-25	4	4	4	4	215	67	106	89	24.7469	49.0161	18.4716	32.7937	33.5758
NM_146222	BC024479	chr9	4	0	1	0.368932	0.5	0.705882	0.567901	0.0100633	1	0.0243065	0.266412	5	5	5	5	103	31	34	81	7.71573	11.3907	4.80749	5.87985	8.68209
NM_001135577	BC024659	chr13	4	0	3	0.615234	0.704194	0.766816	0.725309	2.07158e-07	1.7873e-18	1.10196e-30	2.43204e-16	33	34	38	29	516	457	456	325	71.8731	6.71719	9.16583	11.073	7.36972
NM_146247	BC024814	chr16	4	0	0	0.410468	0.508621	0.380952	0.396648	0.000759497	0.926078	0.0375295	0.00696119	7	7	7	7	364	116	84	179	22.0986	25.4247	15.4297	12.5544	19.6732
NM_001081420	BC026590	chr4	4	0	0	0.423077	0.457778	0.497326	0.371429	0.00276538	0.230064	1	0.0108179	27	22	26	18	393	229	188	105	8.60914	9.26305	8.15345	8.06041	5.06646
NM_173738	BC027344	chr7	3	0	1	0.661871	0.4	0.625	0.704545	0.000168522	0.753906	0.111403	0.00955988	16	3	10	12	139	10	48	45	12.5382	5.41552	2.00694	3.39872	3.71214
NM_153557	BC029214	chr2	4	0	0	0.368421	0.515528	0.378378	0.546296	0.0627367	0.752689	0.047393	0.386573	6	6	6	6	57	161	77	109	35.4549	11.4708	46.0924	20.088	33.8781
NM_001164580	BC030336	chr7	4	0	0	0.47093	0.612903	0.404624	0.479167	0.492672	0.0375142	0.0147383	0.759649	13	10	13	11	173	95	175	97	19.5205	6.35776	5.03084	9.57249	5.52063
NM_153544	BC030867	chr11	3	0	1	0.4625	0.756757	0.714286	0.548387	0.384567	0.00256321	0.453125	0.7201	7	7	2	6	164	37	7	31	0.685968	12.8163	3.88849	2.33494	3.07914
NM_001001181	BC031181	chr18	4	0	0	0.546099	0.590909	0.631791	0.617438	0.015876	0.000347833	4.5078e-09	2.84706e-08	5	5	5	5	721	403	507	572	106.298	95.76	72.3314	86.3379	123.7
NR_033221	BC031361	chr16	0	0	0	NA	0.555556	0.25	NA	NA	1	0.625	NA	0	3	1	0	NA	9	4	NA	1.91192	0.174959	0.785358	0.591244	0.343114
NM_146249	BC031441	chr17	0	0	0	0.666667	NA	0	0.714286	1	NA	0.00195312	0.453125	1	0	3	2	3	NA	10	7	1.41149	0.387495	0.381818	1.63684	0.522445
NM_145943	BC031781	chr1	4	0	0	0.393191	0.534819	0.626794	0.447028	2.46687e-13	0.0673754	2.2499e-10	0.041882	29	28	29	25	1190	728	634	394	8.94081	23.7095	22.3288	18.2803	12.5553
NM_001100452	BC032203	chr17	2	0	0	0.5	0.396226	0.475728	0.714286	1	0.168978	0.693686	0.179565	2	12	16	3	8	54	104	14	9.7619	1.71713	3.38487	6.14261	1.81949
NM_153161	BC037034	chr5	1	0	0	0.578947	0.5	0.5	0.875	0.647606	1	1	0.0703125	2	1	1	1	19	4	4	8	20.3036	8.89648	6.59949	6.75292	6.22173
NM_177673	BC046331	chr4	4	0	0	0.5	0.603448	0.474359	0.390071	1	0.00778793	0.575315	0.0112569	12	12	12	12	247	180	158	141	13.4411	15.3407	15.2348	16.6591	16.479
NM_198861	BC046404	chr11	4	0	1	0.439024	0.821429	0.535714	0.465116	0.532709	0.000912234	0.68888	0.760792	5	4	5	5	42	29	57	43	6.68224	5.72251	4.05211	6.38767	8.61924
NM_207161	BC048355	chr17	4	0	1	0.543624	0.607143	0.262295	0.537037	0.32558	0.344928	0.000264279	0.683489	4	4	4	4	152	29	65	55	5.36258	40.2953	12.0663	21.7151	16.2754
NM_173022	BC048403	chr10	2	0	0	0.521739	0.5	0.517241	0.518519	0.882996	1	0.895683	1	7	7	10	7	48	32	58	28	3.71232	3.31625	2.37287	3.21284	2.13674
NM_001002008	BC049807	chr17	4	0	1	0.396226	0.516129	0.461538	0.722222	0.040872	1	0.749259	0.0962524	4	3	4	4	106	31	40	19	11.4526	17.3348	10.2466	10.4082	8.35222
NR_028430	BC052688	chr13	0	0	0	NA	NA	0	NA	NA	NA	0.25	NA	0	0	1	0	NA	NA	3	NA	1.34351	0.696056	0.495341	1.58353	0.887276
NM_183321	BC053749	chr7	0	0	0	0.769231	0.555556	NA	NA	0.00935531	0.814529	NA	NA	3	3	0	0	26	18	NA	NA	1.59162	2.97771	2.70587	1.15002	0.693454
NM_201364	BC055324	chr1	4	0	1	0.259091	0.4	0.611111	0.333333	5.08235e-13	0.607239	0.480682	0.15159	2	2	2	2	221	15	18	25	0.889192	39.9471	5.5806	6.3955	9.40238
NM_001081184	BC057079	chr4	4	0	0	0.578189	0.61674	0.57384	0.614407	0.000653712	0.000529337	0.0269965	0.000533128	28	27	28	27	491	231	240	237	13.4684	11.6361	8.16976	9.99994	9.1618
NR_015455	BC064078	chr6	4	4	0	0.91423	0.88785	1	0.909326	8.15212e-91	3.50272e-65	7.62939e-06	9.43547e-67	3	3	3	3	514	432	18	390	5.53783	91.1828	116.858	7.06877	127.826
NR_033324	BC065397	chrX	0	0	0	0	0.0192308	1	0	5.82077e-11	2.35367e-14	0.00195312	0.015625	6	8	3	2	35	52	10	7	4.08509	1.17385	2.24424	1.12703	1.20041
NM_001001180	BC066028	chr7	0	0	0	1	0.875	NA	NA	0.000488281	0.0703125	NA	NA	4	2	0	0	12	8	NA	NA	22.7739	0.447949	0.452459	0.226716	0.230246
NM_207522	BC067068	chr10	4	0	0	0.53	0.628571	0.581818	0.540541	0.617299	0.175465	0.28061	0.742829	9	5	8	7	102	35	55	37	4.13707	5.01657	6.31158	5.69659	3.93046
NM_207203	BC068157	chr8	0	0	0	NA	0.7	0.555556	NA	NA	0.115318	1	NA	0	5	2	0	NA	20	9	NA	4.0247	0.367103	2.89111	1.61273	0.292471
NM_001170858	BC068281	chr12	0	0	0	0.571429	1	0.111111	NA	1	0.0078125	0.0390625	NA	2	2	2	0	7	8	9	NA	0.607902	0.590524	0.511597	0.684817	0.327284
NM_001009951	BC088983	chr8	4	0	0	0.687898	0.556452	0.552083	0.54023	2.36735e-11	0.242923	0.358398	0.520292	7	7	6	6	318	128	100	90	10.661	22.8927	14.0215	14.8233	13.7674
NM_020486	Bcam	chr7	4	0	0	0.618182	0.5	0.438596	0.583333	0.104789	1	0.427043	0.0549019	5	4	5	6	55	34	58	148	7.93575	5.4678	4.2752	10.5302	27.1093
NM_001109758	Bcan	chr3	4	0	0	0.383673	0.421642	0.319797	0.340249	0.000327715	0.000328505	4.6525e-07	7.97653e-07	2	2	2	2	247	544	199	243	5.19751	10.8552	28.9837	10.2981	14.0452
NM_007529	Bcan	chr3	4	0	0	0.402904	0.449568	0.438576	0.428571	1.22567e-10	0.00125628	0.000323416	0.00032885	4	4	4	4	1107	1058	883	652	21.9009	119.09	158.056	168.729	86.7522
NM_012060	Bcap31	chrX	4	4	0	0.00359712	0	1	0.00865801	1.14893e-81	1.83671e-40	1.75162e-46	1.55306e-65	2	2	2	2	281	135	155	232	40.0899	128.324	128.67	119.284	158.58
NM_013867	Bcar3	chr3	2	0	0	0.493333	0.333333	NA	NA	1	0.0532519	NA	NA	8	6	0	0	76	39	NA	NA	5.44799	4.55579	3.24208	0.671796	0.764125
NM_029815	Bcas1	chr2	2	0	0	0.608696	NA	0.458564	NA	0.404873	NA	0.127341	NA	2	0	2	0	23	NA	370	NA	13.4171	8.3722	0.676453	139.675	6.11671
NM_026602	Bcas2	chr3	4	0	0	0.391304	0.5	0.485714	0.3125	0.404873	1	1	0.210114	1	1	1	1	23	38	37	16	53.1884	63.1208	62.3009	76.5811	66.0532
NM_009737	Bcat2	chr7	4	0	1	0.618056	0.701754	0.532258	0.519481	0.00576882	0.00320154	0.703537	0.687149	7	7	6	7	148	58	62	155	7.57144	17.7897	10.726	11.6535	23.7853
NM_025392	Bccip	chr7	4	0	0	0.573416	0.483333	0.566607	0.586319	0.000214251	0.603406	0.00179151	0.002938	9	9	9	9	654	303	572	310	41.6238	45.7237	28.629	49.8684	32.7744
NM_029236	Bcdin3d	chr15	2	0	0	0.40625	0.166667	0.2	0.454545	0.377086	0.21875	0.375	1	2	1	1	2	33	6	5	11	3.9573	9.02159	3.79514	2.23127	4.31958
NM_009738	Bche	chr3	4	0	0	0.332353	0.337143	0.329787	0.360976	6.19003e-10	1.96668e-05	4.60273e-16	8.33432e-05	10	8	10	9	343	176	568	206	3.36671	31.0035	19.1112	72.2803	28.9332
NM_007533	Bckdha	chr7	4	0	0	0.652632	0.598706	0.496552	0.664773	0.00383287	0.00061884	1	1.46771e-05	3	3	3	3	95	312	150	178	27.1714	24.4035	73.7737	53.084	58.5806
NM_199195	Bckdhb	chr9	4	0	0	0.521368	0.471338	0.5	0.522267	0.556391	0.523301	1	0.524675	8	8	7	8	234	157	118	248	24.2696	26.7879	22.2549	21.3	40.7524
NM_009739	Bckdk	chr7	4	0	0	0.537525	0.575377	0.503425	0.589041	0.104845	0.00305413	0.953347	0.000785602	6	5	5	5	497	401	295	367	21.0242	37.3073	39.0291	34.587	48.073
NM_009740	Bcl10	chr3	4	0	0	0.535865	0.606335	0.5	0.515152	0.298647	0.00190629	1	0.794123	10	11	10	11	238	222	173	132	5.31915	18.9353	20.9663	16.7679	14.8812
NM_009741	Bcl2	chr1	1	0	0	0.276316	0.410853	0.555556	0.548387	3.2749e-08	0.0523235	1	0.7201	19	17	3	8	152	132	9	31	1.99715	2.58674	4.15022	1.41433	1.32394
NM_009743	Bcl2l1	chr2	4	0	0	0.42069	0.516667	0.430556	0.464286	0.0673295	0.897422	0.288784	0.353141	2	2	2	2	145	61	75	197	45.5662	48.7185	27.4987	46.1619	115.512
NM_207680	Bcl2l11	chr2	0	0	0	0.666667	NA	1	NA	0.6875	NA	0.25	NA	1	0	1	0	6	NA	3	NA	0.103896	0.257922	0.111725	0.193539	0.214421
NM_029410	Bcl2l12	chr7	4	0	0	0.534884	0.575	0.652174	0.485714	0.760792	0.429591	0.21004	1	1	1	1	1	44	41	23	35	0.839182	17.8816	15.2703	8.66429	16.9279
NM_153516	Bcl2l13	chr6	4	0	0	0.575838	0.565217	0.580968	0.571429	3.63217e-07	3.0366e-05	8.48126e-05	8.34511e-05	40	40	40	39	1143	1054	609	784	12.9789	25.9572	31.7262	22.2421	30.3515
NM_009744	Bcl6	chr16	3	0	1	0.428571	0.636364	0.369565	0.818182	1	0.0580641	0.103805	0.0654297	2	5	5	3	7	57	46	11	9.47879	1.49595	10.2542	6.31289	3.20559
NM_007528	Bcl6b	chr11	1	1	0	1	NA	NA	NA	3.72529e-09	NA	NA	NA	1	0	0	0	29	NA	NA	NA	0.882819	9.59831	1.36141	0.0258754	0.0788348
NM_029850	Bcl7a	chr5	4	0	0	0.521739	0.425926	0.478632	0.483871	0.754652	0.148576	0.711703	1	6	6	6	5	92	108	119	33	18.5708	10.3805	14.5211	18.1947	8.81363
NM_009745	Bcl7b	chr5	4	0	0	0.535627	0.550239	0.559055	0.525316	0.165085	0.166379	0.213965	0.577743	9	9	9	9	409	210	129	162	20.2608	23.6993	23.8865	17.2885	17.4496
NM_009746	Bcl7c	chr7	4	0	0	0.44686	0.453846	0.472441	0.475806	0.0344458	0.334688	0.594615	0.48494	5	5	5	3	424	138	129	254	3.94678	45.3635	15.6622	18.5512	42.1569
NM_029933	Bcl9	chr3	2	0	0	0.307692	0.532468	0.421053	0.388889	0.266846	0.648791	0.647606	0.480682	3	8	4	5	13	78	19	18	6.39344	1.86988	5.94486	3.73391	1.89602
NM_030256	Bcl9l	chr9	2	0	1	0.555556	0.258065	0.526316	0.666667	1	0.0106738	1	0.507812	2	3	3	2	9	31	19	9	3.24131	1.65384	6.44297	4.25818	2.36494
NM_133217	Bco2	chr9	0	0	0	0.333333	0.5	NA	NA	1	1	NA	NA	1	1	0	0	3	4	NA	NA	1.45718	1.17053	1.43353	0.982331	0.607249
NM_178782	Bcorl1	chrX	0	0	0	NA	0	1	0.333333	NA	1.52588e-05	0.25	1	0	4	1	1	NA	17	3	3	2.61544	0.267439	2.17884	1.24434	0.514303
NM_001081412	Bcr	chr10	4	0	1	0.621951	0.664804	0.715278	0.694737	0.0022248	1.22847e-05	2.44806e-07	0.000186402	18	15	18	13	166	180	149	99	19.7693	6.96449	11.4251	12.7844	8.4537
NM_025784	Bcs1l	chr1	4	0	1	0.283981	0.514706	0.590909	0.487342	7.84145e-19	0.726381	0.109295	0.811457	8	10	7	9	416	209	92	158	11.5086	50.8333	20.3072	14.1487	24.7029
NM_001122683	Bdh1	chr16	0	0	0	NA	0.8	NA	NA	NA	0.0118179	NA	NA	0	2	0	0	NA	20	NA	NA	1.7349	0.0181216	1.39277	0.0284323	NA
NM_001172055	Bdh2	chr3	0	0	0	0.166667	0.840909	0.75	NA	0.00154388	5.29958e-06	0.625	NA	4	4	1	0	24	44	4	NA	0.547151	0.821423	1.65051	0.379056	0.153983
NM_001081061	Bdp1	chr13	4	0	0	0.442155	0.555172	0.490854	0.555118	0.00411748	0.0685163	0.782538	0.0900428	36	34	32	32	641	295	334	255	11.9477	11.2902	6.93651	8.45946	7.39366
NM_019584	Becn1	chr11	4	0	0	0.400616	0.514706	0.510309	0.505618	4.64789e-07	0.726381	0.722362	0.94028	6	4	4	4	653	208	397	179	55.0838	89.4136	30.9938	70.6019	42.1432
NM_001163175	Begain	chr12	0	0	0	NA	0.333333	NA	NA	NA	1	NA	NA	0	1	0	0	NA	3	NA	NA	36.4197	0.354203	0.355856	0.653805	0.663984
NM_199028	Bend3	chr10	1	0	1	1	0.702128	NA	0.75	0.5	0.00794273	NA	0.145996	1	2	0	2	3	48	NA	12	1.37462	1.88625	8.78497	4.26341	2.51455
NM_001164806	Bend4	chr5	1	0	0	0.646186	0.642336	0.669811	0.83237	2.14664e-10	0.00109102	0.000606076	1.56735e-19	46	26	22	35	477	137	107	173	3.50642	5.41002	2.67473	2.62464	2.99443
NM_177235	Bend6	chr1	4	1	1	0.140244	0.3125	0.32	0.160714	6.82439e-22	0.00105273	0.107752	2.57157e-07	14	12	5	10	166	81	25	56	120.874	9.31557	6.80471	3.7893	7.02903
NM_178663	Bend7	chr2	1	0	1	0.75	0.3	0.333333	1	0.289062	0.34375	0.6875	0.015625	2	2	2	2	8	10	6	7	1.70501	0.858806	3.80666	1.80942	2.26767
NM_009748	Bet1	chr6	4	0	0	0.623306	0.450777	0.506211	0.469314	2.50316e-06	0.19496	0.867259	0.33639	11	13	11	12	372	195	323	278	14.1402	19.8815	13.3807	23.8183	20.751
NM_018742	Bet1l	chr7	4	0	0	0.484076	0.57085	0.526316	0.457711	0.611594	0.0303058	0.466389	0.259034	12	12	12	12	317	250	235	202	21.5429	24.7122	21.5489	23.355	28.3579
NM_009052	Bex1	chrX	2	2	0	NA	0.047619	0.962963	0	NA	2.09808e-05	4.17233e-07	0.25	0	3	3	1	NA	22	27	3	58.7851	0.913151	6.40551	5.52617	4.88469
NM_009749	Bex2	chrX	3	3	0	0	0.0127389	1	0	3.38813e-21	1.35795e-43	0.000488281	0.03125	2	2	1	1	70	157	12	6	185.508	22.6668	94.0867	5.60328	4.18079
NM_212457	Bex4	chrX	4	4	0	0	0	1	0	5.1977e-113	2.18953e-47	1.17549e-38	8.47033e-22	3	3	3	3	376	158	129	72	24.2653	57.7884	35.3527	28.0641	15.9236
NM_025976	Bfar	chr16	2	0	1	0.37037	0.666667	0.714286	0.526316	0.247789	1	0.179565	1	1	1	1	1	27	3	14	19	1.93889	2.76868	1.60841	4.10758	3.42125
NM_007542	Bgn	chrX	1	1	0	NA	NA	1	NA	NA	NA	2.22045e-16	NA	0	0	7	0	NA	NA	53	NA	6.91243	NA	0.336517	6.93703	0.0753479
NM_021560	Bhlhe22	chr3	1	1	0	0.0212766	0.166667	0.357143	NA	6.82121e-13	0.00753784	0.42395	NA	5	3	2	0	47	18	14	NA	15.2112	3.50596	1.91534	1.41686	0.366783
NM_011498	Bhlhe40	chr6	4	0	0	0.392344	0.572603	0.438596	0.493562	0.00226014	0.00641429	0.22323	0.895793	9	9	9	10	210	368	115	233	23.1057	11.9937	31.9716	13.7504	24.9221
NM_024469	Bhlhe41	chr6	4	0	0	0.615385	0.5	0.3125	0.681159	0.581055	1	0.210114	0.00354481	2	3	2	3	13	14	16	70	10.0868	3.02101	3.73398	8.04533	17.7979
NM_031397	Bicc1	chr10	4	0	0	0.446203	0.441379	0.54918	0.38	0.0632264	0.183746	0.319308	0.0209787	11	11	10	9	318	146	122	100	4.59995	18.7857	10.4094	10.0728	9.50306
NM_001039179	Bicd2	chr13	0	0	0	0.6875	0.571429	1	0.777778	0.210114	1	0.25	0.179688	3	1	1	3	16	7	3	9	3.97811	0.755978	1.40509	0.544215	0.48183
NM_007544	Bid	chr6	3	1	0	0.444444	0.555556	0.560386	0.0449438	1	0.145531	0.095055	1.16656e-40	2	16	16	14	9	190	209	178	8.25622	0.866241	13.2218	15.6063	10.9946
NM_021328	Bin3	chr14	4	0	0	0.568182	0.544304	0.518987	0.611111	0.240793	0.499897	0.822144	0.0763692	5	5	5	5	89	80	80	73	10.7742	12.0689	16.5257	18.987	16.4163
NM_007465	Birc2	chr9	4	0	0	0.469136	0.45	0.475936	0.359477	0.369165	0.368202	0.558652	0.000636607	14	10	16	15	245	101	190	155	21.5089	12.4842	8.01378	13.1524	13.9591
NM_001012273	Birc5	chr11	1	1	0	1	1	NA	NA	5.96046e-08	0.125	NA	NA	1	1	0	0	25	4	NA	NA	2.05115	6.6803	1.05905	0.882082	0.790425
NM_007566	Birc6	chr17	4	0	0	0.539359	0.499466	0.360032	0.539384	0.0125966	1	1.90043e-23	0.0624947	30	30	30	30	1037	946	1281	586	29.7533	21.64	29.2228	47.2581	21.5403
NM_144558	Bivm	chr1	4	0	1	0.232794	0.464481	0.46	0.389764	6.19741e-34	0.375092	0.28882	0.000533055	22	16	22	20	500	183	201	254	9.90016	10.8035	7.45179	8.83503	8.84656
NM_016916	Blcap	chr2	4	0	0	0.557143	0.448052	0.517544	0.62314	0.0217153	0.0771606	0.64304	1.47675e-09	6	6	6	6	421	313	231	611	73.6345	36.4165	38.2257	37.9206	79.4882
NM_178645	Blmh	chr11	4	0	0	0.3229	0.482609	0.518325	0.512987	1.64916e-18	0.644488	0.664296	0.809073	5	5	5	5	616	235	195	154	34.9007	95.4127	44.6177	42.2607	46.32
NM_015740	Bloc1s1	chr10	4	0	1	0.704918	0.5	0.566667	0.511628	0.0018681	1	0.584665	1	1	1	1	1	62	23	32	43	80.4017	120.775	173.358	148.887	128.95
NM_028607	Bloc1s2	chr19	4	0	0	0.630435	0.596774	0.666667	0.48	0.103805	0.161881	0.301758	0.887725	1	1	1	1	46	63	15	50	41.5524	80.9829	65.0377	41.7227	89.8008
NM_177692	Bloc1s3	chr7	1	0	0	0.368421	0.666667	0.857143	0.714286	0.359283	1	0.125	0.453125	1	1	1	1	19	3	7	7	8.75061	18.8488	7.18898	10.1477	20.7586
NM_026678	Blvra	chr2	4	0	1	0.606383	0.3	0.511628	0.439024	0.0494501	0.115318	1	0.532709	2	2	2	2	95	20	43	41	19.283	38.9601	12.918	22.7997	22.0777
NM_144923	Blvrb	chr7	4	0	0	0.505344	0.48301	0.5625	0.51861	0.814666	0.521921	0.219131	0.485606	9	8	8	9	661	418	118	409	12.4025	59.8152	63.1998	21.1057	64.0946
NM_007552	Bmi1	chr2	4	0	0	0.576453	0.52861	0.667845	0.550321	0.000105248	0.29648	1.70497e-08	0.033174	6	5	6	6	658	370	285	469	22.0681	48.0452	37.11	36.6428	56.0453
NR_033241	Bmp1	chr14	0	0	0	0.565217	0.45	0.531915	0.565217	0.461391	0.518958	0.770867	0.677639	4	4	4	4	46	60	47	23	1.52744	1.5345	2.38257	2.3678	1.6772
NM_007553	Bmp2	chr2	0	0	0	NA	0	NA	NA	NA	0.03125	NA	NA	0	2	0	0	NA	6	NA	NA	1.43345	0.224592	1.56632	0.0704758	0.465224
NM_080708	Bmp2k	chr5	3	0	0	0.464286	0.561224	0.583333	0.578947	0.850554	0.266406	0.405032	0.417692	3	6	4	5	28	102	36	38	6.15733	2.64881	14.2721	4.47974	5.39908
NM_173404	Bmp3	chr5	0	0	0	NA	0.4	NA	NA	NA	0.503445	NA	NA	0	5	0	0	NA	20	NA	NA	3.30721	0.054452	2.86752	0.370213	0.375977
NM_007557	Bmp7	chr2	4	1	1	0.811024	0.973684	0.513514	0.693548	7.46015e-13	2.83762e-10	1	0.00315606	4	4	3	4	129	38	38	62	6.0188	18.0143	6.54273	10.5032	15.6109
NM_028472	Bmper	chr9	3	1	2	0.741818	0.836735	0.741935	0.946903	4.49141e-16	1.96465e-06	0.0106738	5.14918e-25	8	6	5	8	275	49	31	114	3.91685	16.2917	4.79014	2.05612	10.2508
NM_009758	Bmpr1a	chr14	4	0	1	0.84864	0.590164	0.600806	0.597156	7.38434e-229	3.4097e-06	4.24097e-08	1.82514e-08	19	18	18	19	1959	676	752	848	23.244	68.8619	37.476	41.959	54.8294
NM_007560	Bmpr1b	chr3	1	0	0	0	0.485651	NA	NA	0.25	0.572932	NA	NA	1	30	0	0	4	457	NA	NA	7.97126	0.254055	13.6049	0.215911	0.101203
NM_007561	Bmpr2	chr1	4	0	1	0.288703	0.504098	0.544808	0.480861	9.93142e-21	0.853398	0.0193036	0.463189	11	11	12	11	479	737	713	421	54.027	35.2568	80.4855	67.9016	49.1462
NM_194339	Bms1	chr6	4	0	0	0.517857	0.625	0.632479	0.505747	0.548504	0.000859741	0.00531928	1	14	14	14	12	337	186	121	87	10.1161	19.1796	16.18	12.3386	7.97601
NM_009759	Bmx	chrX	1	1	0	0	NA	NA	NA	0.000976562	NA	NA	NA	1	0	0	0	11	NA	NA	NA	0.503104	3.64661	0.0267533	NA	NA
NM_023326	Bmyc	chr2	0	0	0	0.166667	0.666667	0.6	NA	0.21875	0.6875	1	NA	1	1	1	0	6	6	5	NA	16.6283	7.05222	15.3905	8.85179	12.2002
NM_172149	Bnip1	chr17	4	0	0	0.456989	0.4875	0.386667	0.573171	0.271352	0.911072	0.0639499	0.224245	6	6	6	6	193	80	76	82	15.3556	22.7922	15.5888	16.7754	15.1252
NM_016787	Bnip2	chr9	4	0	0	0.502732	0.518072	0.555556	0.534247	0.958322	0.612258	0.18149	0.344153	4	4	4	3	372	254	164	220	11.0118	45.9042	29.6223	32.6545	38.5727
NM_009760	Bnip3	chr7	4	0	0	0.574751	0.613861	0.59	0.573913	0.0110865	0.0280895	0.0886261	0.0293377	6	6	6	6	305	101	101	230	73.2635	24.0608	13.46	18.623	29.7789
NM_009761	Bnip3l	chr14	4	0	0	0.593182	0.465116	0.531646	0.541463	0.000108024	0.289867	0.36317	0.263738	9	9	9	9	443	261	238	207	74.386	69.293	64.0518	60.2595	63.4498
NM_172506	Boc	chr16	4	0	0	0.412371	0.428571	0.37037	0.43038	0.103769	0.11824	0.247789	0.260426	15	16	6	14	98	133	27	80	4.58953	5.14079	8.26088	4.00286	5.6506
NM_001081422	Bod1l	chr5	4	0	0	0.501276	0.522959	0.544496	0.504167	0.971513	0.211272	0.0102331	0.891104	47	47	47	44	790	793	863	483	22.8114	10.2904	15.6073	19.3325	9.821
NM_016778	Bok	chr1	3	1	1	0.852459	0.674157	0.88	0.707317	6.78088e-16	0.00133526	0.000156522	0.0115078	7	6	5	7	124	91	25	41	10.6793	9.4273	10.2738	2.41362	4.08533
NM_175103	Bola2	chr7	4	0	0	0.610837	0.62963	0.458333	0.490385	0.00194043	0.0759047	0.665466	0.921949	2	2	2	2	204	55	48	106	91.2755	177.5	94.7072	67.8481	171.994
NM_175277	Bola3	chr6	4	0	0	0.537688	0.638298	0.370968	0.537234	0.32099	0.0789407	0.0558972	0.34309	1	1	1	1	199	51	63	188	49.3703	119.151	64.9218	49.4953	210.403
NM_013481	Bop1	chr15	4	0	0	0.60176	0.660839	0.672862	0.690987	9.15535e-10	5.74818e-08	1.47318e-08	5.37147e-09	10	10	10	10	919	291	271	235	21.4529	77.0622	35.9434	35.4708	30.6795
NM_007563	Bpgm	chr6	4	0	0	0.569536	0.503676	0.563286	0.545126	0.00353357	0.951666	1.37221e-05	0.149165	8	8	8	8	456	275	1206	277	44.5523	31.6567	21.9645	137.735	30.4652
NM_026512	Bphl	chr13	4	1	3	0.722973	0.724138	0.747748	1	5.56446e-08	3.47997e-05	1.6752e-07	3.58732e-43	4	5	4	4	151	88	112	145	24.6729	22.7061	30.7212	33.6461	29.4055
NM_011794	Bpnt1	chr1	4	0	1	0.264624	0.461783	0.616959	0.44702	1.16229e-37	0.194219	1.01721e-09	0.0742733	11	12	12	12	728	318	687	304	29.4733	43.9039	30.1385	64.8632	27.5949
NM_176850	Bptf	chr11	4	0	0	0.338747	0.536453	0.557833	0.55794	1.76403e-21	0.0294151	0.00281288	0.088292	30	30	28	28	867	923	692	234	15.62	17.386	25.8229	20.3352	8.46912
NM_139294	Braf	chr6	4	0	0	0.541096	0.575342	0.553292	0.533186	0.0943397	0.00463977	0.00793896	0.172485	37	37	42	42	440	371	644	455	39.6336	6.52709	8.49644	11.8262	10.9739
NM_028227	Brap	chr5	4	0	0	0.440729	0.504132	0.522634	0.484305	0.0360101	0.948763	0.521283	0.687932	12	11	12	12	333	247	249	224	28.2355	25.2904	27.2672	33.6157	23.3251
NM_009764	Brca1	chr11	4	0	2	0.353659	0.181818	0.461538	0.272727	0.0106375	0.00434351	0.845019	0.226562	2	2	2	2	83	22	26	11	0.629753	27.2993	4.90973	6.33214	6.90456
NM_001033274	Brd1	chr15	4	0	0	0.538462	0.610169	0.492537	0.545455	0.620145	0.117477	1	0.728332	7	7	7	6	65	61	71	34	10.0572	6.87231	8.70137	11.6106	5.27368
NM_020508	Brd4	chr17	2	0	0	0.565217	0.466667	0.416667	0.5	0.677639	1	0.541256	1	4	3	3	2	23	15	24	11	3.01809	1.09467	4.64696	4.24149	1.24372
NM_030147	Brd8	chr18	4	0	0	0.557471	0.605634	0.425	0.554913	0.00974618	0.000443489	0.0400372	0.170972	13	13	14	10	527	290	206	176	20.837	44.1541	28.2074	28.1768	28.1344
NM_001024508	Brd9	chr13	4	0	0	0.533884	0.606061	0.522267	0.550173	0.103822	1.29719e-05	0.524675	0.0993787	10	10	9	9	608	433	254	291	38.797	44.8218	54.8428	30.1916	35.5974
NM_054054	Brdt	chr5	1	0	0	0.48	0.5	0.529412	0.47619	1	1	0.620768	1	4	7	9	4	25	27	107	21	4.75918	0.827486	1.55326	3.78201	1.12743
NM_144541	Bre	chr5	4	0	0	0.59375	0.428571	0.5	0.5	0.377086	0.571588	1	1	1	1	1	1	32	28	34	24	3.35723	5.34846	8.23124	6.20841	7.6215
NM_028193	Brf1	chr12	4	4	0	0	0	0	0	3.63798e-12	2.98023e-08	4.54747e-13	1.49012e-08	1	1	1	1	39	27	43	27	19.0693	18.678	20.4267	30.0451	17.4779
NM_025686	Brf2	chr8	4	0	0	0.588235	0.621622	0.52381	0.6	0.262438	0.187742	0.877614	0.268187	4	4	4	4	51	37	42	40	11.6883	10.8232	12.498	12.4957	11.1934
NM_029752	Bri3bp	chr5	4	0	0	0.507293	0.587838	0.59761	0.563107	0.747431	0.00296945	0.00238099	0.0304723	20	18	19	21	619	299	253	310	25.6745	15.1882	10.2391	10.9194	11.7076
NM_178309	Brip1	chr11	0	0	0	1	NA	NA	NA	0.00390625	NA	NA	NA	2	0	0	0	9	NA	NA	NA	2.21062	13.0312	2.95779	3.18384	3.98657
NM_026396	Brix1	chr15	4	0	0	0.551622	0.524272	0.510121	0.61215	0.0646424	0.530722	0.799161	0.00126095	11	13	17	12	342	207	249	214	12.9265	19.8995	17.4782	18.5995	18.1091
NM_134155	Brms1	chr19	4	0	0	0.467532	0.530612	0.405405	0.45	0.648791	0.77545	0.324009	0.823803	2	2	2	2	77	50	37	20	12.5594	30.1844	22.7122	22.6526	21.3909
NM_001037756	Brms1l	chr12	4	0	0	0.480962	0.528571	0.526012	0.433333	0.420391	0.554269	0.54316	0.0451624	8	8	8	8	505	141	175	243	39.5768	44.642	24.3437	30.4966	34.1633
NM_021555	Brp16	chr15	4	0	0	0.516854	0.629213	0.695652	0.675676	0.832258	0.0191866	0.0113516	0.047031	7	7	7	6	90	91	46	38	5.36539	9.90712	9.40039	6.93848	7.22953
NM_027430	Brp44	chr1	4	0	0	0.314607	0.455882	0.528634	0.492248	3.67809e-15	0.233874	0.425823	0.851885	4	4	4	4	454	207	232	260	68.9051	72.9542	37.7493	51.3683	69.8735
NM_018819	Brp44l	chr17	4	0	0	0.464088	0.534562	0.34072	0.449848	0.372465	0.163833	1.44562e-09	0.0775364	2	2	2	2	183	437	365	330	213.228	52.686	161.94	175.586	171.174
NM_030178	Brpf1	chr6	4	0	0	0.5	0.62069	0.52	0.6	1	0.264931	1	0.753906	2	2	2	2	18	29	25	10	10.6713	12.317	15.5888	10.7828	9.20347
NM_001081315	Brpf3	chr17	3	0	0	0.565789	0.556391	0.352518	0.631579	0.301872	0.22463	0.000638295	0.143307	13	15	13	9	76	133	141	38	5.91888	3.87725	7.73923	9.83714	2.65202
NM_001003920	Brsk1	chr7	4	0	1	0.5	0.444444	0.724138	0.488889	1	0.701108	0.0241195	1	4	3	4	4	52	27	29	46	43.9065	6.94038	4.80484	6.98334	6.64129
NM_001103179	Brwd1	chr16	0	0	0	0.5	0.65625	0.47619	0.565217	1	0.110184	0.877614	0.677639	3	3	3	3	28	33	42	23	2.93548	1.16757	1.45938	1.70271	1.08524
NM_145125	Brwd1	chr16	0	0	0	0.693878	0.634146	0.390244	0.72973	0.00939924	0.117275	0.211024	0.00763208	5	8	7	7	50	41	41	38	4.58197	0.760005	0.799517	1.21317	0.842429
NM_176928	Brwd1	chr16	4	0	0	0.491525	0.589286	0.68	0.487805	1	0.228806	0.0153467	1	5	5	5	2	59	58	50	41	20.8123	8.48263	10.5596	9.35124	12.0582
NM_001081477	Brwd3	chrX	4	4	0	0	0.00826446	1	0.015873	9.62965e-35	9.17826e-35	7.70372e-34	1.38778e-17	10	10	10	6	115	123	113	63	5.33212	6.8126	6.82235	9.20118	5.46956
NM_001136064	Bscl2	chr19	0	0	0	NA	0.125	NA	NA	NA	0.00418091	NA	NA	0	2	0	0	NA	16	NA	NA	0.637514	0.230433	2.04982	1.35579	0.275379
NM_133889	Bsdc1	chr4	4	0	0	0.543689	0.471204	0.564516	0.496933	0.236161	0.469421	0.177732	1	6	6	6	6	208	192	126	163	24.4048	18.2264	25.5482	22.2642	20.5122
NM_198095	Bst2	chr8	0	0	0	NA	0.875	NA	NA	NA	0.0703125	NA	NA	0	1	0	0	NA	8	NA	NA	3.07436	0.29496	3.04363	0.462785	0.352492
NM_001080706	Btaf1	chr19	4	0	0	0.502732	0.462264	0.509653	0.596639	0.931987	0.302904	0.803769	0.00344806	34	28	30	25	553	217	266	239	9.32788	11.9223	7.25613	9.37372	8.50422
NM_146193	Btbd1	chr7	4	0	0	0.535156	0.482085	0.529042	0.487179	0.0264555	0.291679	0.153705	0.388258	16	13	14	15	1032	926	648	1213	89.6331	53.6428	63.6239	49.7307	97.6507
NM_133700	Btbd10	chr7	4	0	0	0.542636	0.542553	0.541284	0.473684	0.190975	0.470492	0.44367	0.639769	7	6	7	7	260	99	110	114	36.7078	19.0413	12.3273	13.6583	15.4863
NM_028709	Btbd11	chr10	0	0	0	0.428571	NA	0.882353	0.789474	1	NA	0.00234985	0.0192108	2	0	3	4	7	NA	17	19	0.818904	0.575879	0.38898	0.76571	1.33753
NM_177472	Btbd12	chr16	4	0	0	0.551084	0.487685	0.530864	0.540881	0.0748265	0.778988	0.479615	0.341294	21	19	20	20	327	205	163	159	8.98296	11.1267	9.41168	9.10152	9.02238
NM_028055	Btbd17	chr11	4	0	0	0.425926	0.549587	0.45098	0.564516	0.148576	0.139114	0.575849	0.177732	4	4	3	4	108	246	52	128	11.4365	15.8708	42.8648	8.66626	25.6071
NR_024078	Btbd19	chr4	1	1	0	0.909091	0.222222	NA	0.666667	0.0117188	0.179688	NA	1	2	2	0	1	12	9	NA	3	4.57692	4.22706	3.83421	2.06181	2.65228
NM_145361	Btbd2	chr10	4	0	0	0.581395	0.51938	0.54902	0.621212	0.160578	0.724854	0.372944	0.0640175	5	5	5	5	86	132	106	69	20.609	9.76259	21.8918	16.5766	14.0983
NM_001025431	Btbd3	chr2	0	0	0	0.444444	NA	0.3	NA	1	NA	0.34375	NA	1	0	1	0	9	NA	11	NA	0.250742	0.280111	0.0346674	0.305729	0.0776223
NM_145534	Btbd3	chr2	0	0	0	NA	0.333333	NA	NA	NA	1	NA	NA	0	1	0	0	NA	3	NA	NA	3.131	NA	0.0976443	0.12558	NA
NM_172806	Btbd7	chr12	4	0	0	0.605263	0.648649	0.632812	0.522876	0.00179207	6.40401e-05	0.00337419	0.627771	7	7	7	7	231	189	132	156	8.41959	19.9652	23.0017	22.1044	21.1108
NM_027060	Btbd9	chr17	0	0	0	0.428571	0.449275	0.27027	0.555556	0.391603	0.470369	0.00763208	0.814529	3	4	4	3	49	69	37	19	1.03456	0.469541	0.855877	0.529905	0.36752
NM_007568	Btc	chr5	0	0	0	NA	NA	NA	0.75	NA	NA	NA	0.625	0	0	0	1	NA	NA	NA	4	0.998592	0.242511	0.143817	0.919526	1.32026
NM_025295	Btd	chr14	4	0	0	0.663391	0.599156	0.672131	0.663551	4.07686e-11	0.0027313	4.14906e-11	1.96182e-06	8	8	8	8	412	241	372	215	6.06949	35.8417	25.1956	49.0169	31.0835
NM_027453	Btf3l4	chr4	4	0	0	0.434696	0.518519	0.521851	0.549719	3.95237e-05	0.400973	0.236747	0.0242082	12	12	12	12	1009	574	790	535	46.7738	66.3621	57.9631	71.1038	57.6008
NM_007569	Btg1	chr10	3	0	0	0.527027	0.456647	0.58871	0.627119	0.727547	0.287118	0.0588759	0.00733002	4	4	4	4	75	175	125	119	14.5368	2.82086	17.6654	13.968	6.79607
NM_007570	Btg2	chr1	4	0	1	0.280161	0.442975	0.389241	0.34748	4.107e-34	0.00565515	9.77115e-05	4.27588e-17	9	9	9	9	754	611	321	757	10.213	52.8756	68.7898	34.035	82.4711
NM_009774	Bub3	chr7	4	0	0	0.569476	0.668367	0.529801	0.518367	0.00413619	2.79763e-06	0.515163	0.609371	2	2	2	2	444	199	153	247	58.8263	162.143	89.0787	102.165	117.77
NM_146000	Bud13	chr9	4	0	0	0.545455	0.587156	0.378641	0.571429	0.315625	0.0842216	0.0176091	0.349682	9	9	9	8	143	112	105	56	5.46447	15.6306	12.3431	10.9976	8.23397
NM_001008705	Bud31	chr5	4	0	0	0.356643	0.605263	0.614035	0.554054	0.000764305	0.0846461	0.111161	0.415985	1	1	1	1	144	78	60	75	41.6103	76.7554	72.5255	70.8987	60.5127
NM_138678	Butr1	chr11	0	0	0	0	NA	NA	NA	0.25	NA	NA	NA	1	0	0	0	3	NA	NA	NA	0.141409	0.164839	0.156408	NA	0.0875516
NM_024285	Bves	chr10	1	0	0	0.692308	0.5	NA	0.428571	0.266846	1	NA	1	3	1	0	2	13	8	NA	7	1.70063	3.19859	2.70147	0.441186	2.12826
NM_016859	Bysl	chr17	4	0	0	0.433735	0.507463	0.390947	0.512346	0.0423525	0.827046	0.0008152	0.813753	18	19	17	17	254	344	245	162	6.57815	9.04286	15.3111	14.303	8.19695
NM_172449	Bzrap1	chr11	0	0	0	NA	1	NA	NA	NA	0.25	NA	NA	0	1	0	0	NA	3	NA	NA	36.5367	0.0148332	2.03729	0.221093	0.319076
NM_025824	Bzw1	chr1	4	0	1	0.271366	0.439583	0.526232	0.469453	2.68051e-55	0.0092062	0.201945	0.0666919	5	4	4	5	1148	490	640	939	103.774	294.348	134.794	163.545	252.313
NM_025840	Bzw2	chr12	4	0	0	0.498458	0.516043	0.49711	0.479592	0.948881	0.569553	0.957136	0.39073	6	6	6	6	980	379	352	495	30.3323	119.491	66.6439	58.9717	90.2435
NR_026848	C030034I22Rik	chr17	0	0	0	0.875	NA	0.3	0.7	0.0703125	NA	0.34375	0.34375	2	0	2	3	8	NA	10	10	1.39858	0.782225	0.351576	1.25959	0.655999
NR_015499	C030034L19Rik	chr3	0	0	0	0.1	0	0.0172414	0	1.85702e-07	2.64698e-23	4.09395e-16	0.00390625	3	2	2	1	41	76	58	10	1.18706	2.93686	2.66697	1.35691	0.660309
NR_015601	C030044B11Rik	chr13	4	0	0	0.538922	0.532258	0.385714	0.390476	0.353138	0.703537	0.0722379	0.0313018	3	2	3	3	169	63	70	107	21.387	16.5973	10.1318	11.4725	15.3498
NM_001081319	C030046E11Rik	chr19	4	0	0	0.513678	0.587537	0.549153	0.617117	0.659239	0.00154257	0.102893	0.000588342	19	17	18	18	334	340	300	225	12.718	10.7359	15.6385	14.5307	13.2239
NM_177994	C030046I01Rik	chr10	4	0	0	0.456019	0.537473	0.549784	0.472527	0.0749273	0.115546	0.0361825	0.396859	8	8	8	8	438	484	466	279	130.903	36.5089	50.1082	58.3035	39.54
NM_172991	C030048B08Rik	chr5	4	0	0	0.368421	0.35	0.3125	0.45	0.0627367	0.263176	0.210114	0.823803	4	2	2	3	58	20	16	20	7.91441	6.08747	4.41838	3.84326	4.28954
NM_172730	C130022K22Rik	chr6	4	0	0	0.525926	0.544025	0.570213	0.464286	0.320318	0.129874	0.0366224	0.316233	15	15	13	15	411	322	242	227	19.774	16.0742	13.5896	14.2241	14.8041
NR_015507	C130036L24Rik	chr1	0	0	0	0	NA	NA	NA	0.125	NA	NA	NA	1	0	0	0	4	NA	NA	NA	5.21304	1.38312	1.01604	0.700026	0.639832
NM_178692	C130074G19Rik	chr1	0	0	0	NA	0.333333	NA	0	NA	1	NA	0.25	0	1	0	1	NA	3	NA	3	17.9659	NA	0.366323	NA	0.347015
NM_020558	C1d	chr11	4	0	0	0.313531	0.567376	0.571429	0.530303	7.53942e-11	0.129258	0.171565	0.542507	4	5	4	4	303	141	105	132	15.8789	14.8232	9.08067	12.258	10.2269
NM_052993	C1galt1	chr6	4	0	0	0.658385	0.508475	0.572464	0.546875	7.14912e-05	0.926704	0.018736	0.330936	10	10	10	9	161	118	278	130	9.31087	9.71519	8.2575	27.1366	11.1196
NM_021550	C1galt1c1	chrX	4	4	0	0	0.0294118	1	0	1.26218e-29	4.07454e-09	2.58494e-26	4.44089e-16	2	3	2	2	97	34	87	52	22.0126	43.1039	20.6986	41.2243	32.37
NM_007573	C1qbp	chr11	4	0	0	0.418033	0.574924	0.521452	0.6	0.000339112	0.00784832	0.490646	0.00508571	3	3	3	3	491	336	304	208	41.0275	98.2789	90.3309	66.7147	73.7793
NM_011795	C1ql1	chr11	2	0	0	0.428571	0.5	0.572552	0.465517	1	1	1.02649e-06	0.694004	1	1	4	3	7	6	1165	59	15.646	1.95088	4.71385	654.247	12.7233
NM_153155	C1ql3	chr2	1	0	0	NA	0.5	0.546296	0.428571	NA	1	0.386573	0.663624	0	3	4	4	NA	22	109	21	23.4023	0.17858	2.31294	8.82591	1.53657
NM_026161	C1qtnf4	chr2	0	0	0	NA	0.25	NA	NA	NA	0.289062	NA	NA	0	1	0	0	NA	8	NA	NA	30.8414	0.0413809	1.47241	0.129851	0.131873
NM_028331	C1qtnf6	chr15	4	0	0	0.460957	0.607843	0.589147	0.444816	0.132052	0.00945384	0.0523235	0.0640457	4	4	4	4	399	154	130	300	1.63473	84.2834	36.6001	35.7387	96.3696
NM_178643	C230052I12Rik	chr7	4	0	1	0.658537	0.702128	0.4	0.54902	0.000556092	0.00794273	0.503445	0.575849	11	6	3	7	124	47	20	51	2.78053	8.78233	3.73193	3.07307	5.03373
NM_001039231	C230055K05Rik	chr5	1	0	1	0	0.666667	0.810127	0	0.125	0.0987371	2.30344e-08	0.00390625	1	8	15	3	4	30	80	9	2.50375	0.661553	2.82472	5.61719	1.05412
NM_172924	C230081A13Rik	chr9	4	0	0	0.469136	0.551524	0.567265	0.597826	0.291158	0.00761305	0.00515309	0.00137817	36	37	38	35	328	695	453	276	8.63019	6.64196	18.4015	14.1907	9.36182
NR_015479	C230091D08Rik	chr7	4	0	0	0.55	0.542373	0.623188	0.619048	0.518958	0.602923	0.0532894	0.0769258	2	2	2	2	60	59	71	63	27.6544	6.3218	7.7185	8.91491	8.39834
NM_174847	C2cd2	chr16	4	0	0	0.570588	0.557692	0.610063	0.461883	0.0106987	0.173291	0.00682262	0.283946	21	16	17	18	342	159	160	226	6.39131	10.1164	6.85586	6.51662	12.4672
NM_027909	C2cd2l	chr9	4	0	0	0.526946	0.473684	0.555556	0.535714	0.536005	0.681743	0.496617	0.68888	8	8	8	7	168	97	56	56	44.0062	10.7131	7.23433	6.56393	6.45845
NM_001017985	C2cd3	chr7	4	0	0	0.487633	0.57483	0.632143	0.495798	0.721413	0.0120186	1.1514e-05	1	27	27	29	22	286	295	286	119	6.93061	6.65294	11.9392	10.2227	4.80492
NM_172725	C330006K01Rik	chr5	4	0	0	0.661616	0.603175	0.647059	0.67	6.347e-06	0.00556613	3.19941e-05	0.00087372	26	24	25	20	200	192	205	104	5.90307	5.31257	7.75083	9.17113	5.44687
NM_029951	C330007P06Rik	chrX	4	4	0	0.00555556	0.00280112	0.992352	0.00795756	1.45838e-155	2.43896e-105	2.26199e-148	5.80243e-107	16	15	19	15	546	358	530	379	17.4668	21.7211	21.5973	22.5606	23.5587
NM_145974	C330016O10Rik	chr11	1	0	0	0.47619	0.8	0.166667	0.333333	0.877614	0.0351562	0.21875	1	7	4	2	1	42	15	6	3	3.97897	5.05114	2.3443	0.930338	0.664875
NM_029909	C330018D20Rik	chr18	4	0	0	0.568421	0.5	0.538462	0.623377	0.218054	1	0.677809	0.0395395	10	5	6	9	95	30	54	77	6.71671	5.64615	4.3348	7.49861	6.83142
NM_194340	C330019G07Rik	chr5	4	0	0	0.463235	0.544974	0.588942	0.543568	0.150995	0.0894999	0.000333631	0.197535	32	33	36	29	415	382	422	245	12.9185	7.95374	10.5123	13.6305	7.68943
NM_001034857	C330019L16Rik	chr7	0	0	0	0.428571	NA	1	NA	1	NA	0.0625	NA	2	0	1	0	7	NA	5	NA	2.09631	0.498942	0.478928	1.07411	0.665593
NR_015582	C330024D21Rik	chr5	0	0	0	0.0833333	0.15	0.111111	0.222222	0.00634766	0.00257683	0.0390625	0.179688	1	1	1	1	12	20	9	9	12.5428	1.18571	1.89128	1.0264	1.10753
NM_172616	C330027C09Rik	chr16	4	0	0	0.501129	0.425532	0.490566	0.515152	1	0.381693	1	0.902159	3	3	3	3	448	47	53	66	1.43393	53.1447	8.5775	13.4251	14.7665
NM_198957	C430048L16Rik	chr4	3	0	2	0.680412	0.487179	0.742857	0.777778	0.000490158	1	0.00598812	0.000247088	4	3	3	4	97	39	35	46	4.56556	4.43504	2.53431	3.00067	3.62534
NM_011413	C4a	chr17	1	1	0	NA	NA	1	NA	NA	NA	0.00195312	NA	0	0	2	0	NA	NA	10	NA	1.03582	0.189653	0.524862	4.1989	0.235039
NM_009780	C4b	chr17	2	0	2	NA	0.266667	0.294565	1	NA	0.118469	1.77799e-36	0.25	0	2	3	1	NA	16	937	3	4.25349	0.08379	4.20379	447.11	2.83711
NR_029450	C530005A16Rik	chr4	0	0	0	NA	NA	0.666667	NA	NA	NA	0.6875	NA	0	0	2	0	NA	NA	6	NA	2.4586	0.0231876	0.165012	0.254665	0.258629
NM_001163793	C530008M17Rik	chr5	4	0	0	0.593103	0.567376	0.553314	0.582456	0.00180772	0.000100059	0.0531311	0.006334	34	38	33	29	295	861	352	285	14.59	5.32206	23.4771	10.5674	7.88761
NM_175454	C630004H02Rik	chr11	4	0	1	0.294521	0.523585	0.552448	0.663366	7.39694e-07	0.536595	0.241604	0.00133183	13	14	14	13	146	214	145	102	22.4092	10.4175	24.2647	15.6056	8.45255
NR_027923	C630043F03Rik	chr4	1	0	1	0.836066	0.666667	1	0.5	9.62443e-08	0.507812	0.0078125	1	7	2	2	1	62	9	8	4	3.64637	4.05716	1.28654	1.84701	1.30633
NM_001033189	C77080	chr4	1	0	0	0.5	0.8	0.631579	0.571429	1	0.0351562	0.143307	1	2	4	7	2	10	15	39	7	1.93936	1.24143	1.95289	3.63925	1.59635
NM_001077354	C77370	chrX	2	2	0	0	NA	1	0.00884956	1.73472e-18	NA	1.35525e-20	2.19556e-32	10	0	9	13	61	NA	70	113	12.0913	2.02806	0.0738235	3.44239	5.92582
NM_001033192	C78339	chr13	4	0	0	0.682008	0.551724	0.688525	0.546012	1.86724e-08	0.30709	0.00444402	0.272784	3	3	2	3	241	116	63	166	28.6736	34.9707	26.08	19.5087	34.6065
NM_153540	C85492	chr9	4	0	0	0.560241	0.454545	0.541284	0.674242	0.0321665	0.538583	0.249516	7.69236e-05	14	9	14	14	338	67	223	133	14.8743	20.6722	6.71928	19.9019	10.5238
NR_027370	C87436	chr6	0	0	0	0.5	0.5	0.5	0.5	1	1	1	1	1	1	1	1	14	4	6	4	0.804369	1.35564	0.509161	1.47706	0.690023
NM_027062	C8g	chr2	0	0	0	0	0	1	0.5	0.125	0.25	0.25	1	1	1	1	1	4	3	3	6	1.93264	0.979507	3.02058	1.6222	3.2082
NM_001045559	C920016K16Rik	chr17	4	0	0	0.609524	0.5	0.446154	0.622951	0.0313018	1	0.457021	0.0721774	5	5	5	5	107	28	65	61	7.87732	8.03708	3.58137	11.402	8.40786
NM_133781	Cab39	chr1	4	0	1	0.242165	0.487896	0.491841	0.424286	1.23488e-65	0.604612	0.772099	7.01864e-05	7	7	7	7	1063	546	436	706	85.5146	88.7259	59.9992	63.0392	82.0212
NM_026908	Cab39l	chr14	4	0	0	0.544355	0.496296	0.466216	0.477477	0.182253	1	0.459541	0.704379	16	15	14	14	248	137	152	111	14.9437	15.4743	11.1445	11.9643	14.1065
NM_172549	Cabin1	chr10	4	0	0	0.421687	0.56044	0.491124	0.535211	0.0158631	0.0240752	0.87779	0.450208	18	17	16	16	252	370	173	143	12.5141	10.3505	21.9951	10.0028	8.28848
NM_001146287	Cables1	chr18	0	0	0	1	0.333333	0.666667	0	0.25	1	1	0.125	1	1	1	1	3	3	3	4	0.217421	0.101379	0.14429	0.132551	0.18846
NM_145851	Cables2	chr2	4	0	0	0.492891	0.646526	0.507772	0.512195	0.890531	1.07581e-07	0.885578	0.856984	23	25	19	21	211	335	194	123	14.3739	5.61972	11.165	7.5533	4.15634
NM_138948	Cabp7	chr11	0	0	0	NA	NA	1	0.666667	NA	NA	0.25	1	0	0	1	1	NA	NA	3	3	16.7204	0.161616	0.46005	2.53572	1.9314
NM_198037	Cachd1	chr4	4	0	0	0.359375	0.466667	0.576923	0.557377	0.0327658	0.205482	0.33175	0.442626	11	17	9	11	65	392	52	62	6.25975	3.3561	22.086	3.74842	4.33247
NM_009785	Cacna2d3	chr14	0	0	0	1	1	NA	NA	0.25	0.25	NA	NA	1	1	0	0	3	3	NA	NA	54.8189	0.214016	0.652724	NA	NA
NM_023116	Cacnb2	chr2	2	0	0	0.433735	0.32	0.555556	0.441176	0.272269	0.000408777	1	0.607591	10	12	3	8	84	100	9	34	25.1775	4.2221	6.9025	1.34278	2.78797
NM_007581	Cacnb3	chr15	0	0	0	0	NA	NA	NA	0.5	NA	NA	NA	1	0	0	0	6	NA	NA	NA	0.794135	0.280521	0.114074	0.220065	0.255418
NM_019431	Cacng4	chr11	4	1	0	0.117647	0.358974	0.542553	0.541667	5.74776e-11	0.0168531	0.470492	0.83882	2	2	2	2	68	80	95	24	13.5027	19.9764	22.5495	43.0508	8.96371
NM_080644	Cacng5	chr11	1	0	1	NA	0.297297	NA	0	NA	0.0200739	NA	0.125	0	6	0	1	NA	37	NA	4	8.76634	0.0153575	5.70494	0.746961	2.10448
NM_133189	Cacng7	chr7	4	0	0	0.515152	0.507812	0.401961	0.376471	0.840822	0.929614	0.0594005	0.0294564	1	1	1	1	100	130	102	86	57.4098	48.2987	79.0345	66.8956	75.3286
NM_133190	Cacng8	chr7	0	0	0	0	0	NA	0	0.000244141	0.25	NA	0.25	3	1	0	1	13	3	NA	3	20.8955	2.84247	15.0414	0.343058	4.52918
NM_009786	Cacybp	chr1	4	0	0	0.396146	0.56092	0.633197	0.606925	7.51845e-15	0.0125704	4.26878e-09	2.4713e-06	8	8	8	8	1413	443	495	493	59.4139	186.213	60.8791	70.0529	77.8657
NM_023525	Cad	chr5	4	0	0	0.494444	0.513011	0.517045	0.510204	0.940612	0.714568	0.706371	0.919607	14	14	14	14	180	277	180	98	3.30177	9.41945	17.6717	14.043	7.75146
NM_153112	Cadm4	chr7	4	0	1	0.633333	0.661538	0.66055	0.752475	0.200488	0.000289549	2.45396e-06	3.72314e-07	4	4	4	4	30	130	225	103	61.8303	8.57103	48.6466	105.813	46.4424
NM_153163	Cadps2	chr6	0	0	0	NA	0.939394	NA	NA	NA	1.30851e-07	NA	NA	0	6	0	0	NA	34	NA	NA	34.5868	NA	1.88252	0.0185288	0.150538
NM_027724	Cage1	chr13	0	0	0	NA	0.142857	0.2	0.571429	NA	0.125	0.375	1	0	2	2	2	NA	7	6	7	2.28886	1.54158	1.71589	1.30237	1.76353
NM_026192	Calcoco1	chr15	4	0	0	0.616959	0.55643	0.691152	0.580381	1.7856e-05	0.0020555	3.97487e-21	0.00241943	16	16	16	16	343	767	607	373	23.5975	15.1362	52.9538	40.5714	28.5634
NM_018782	Calcrl	chr2	4	0	0	0.482353	0.385965	0.413793	0.316092	0.616473	0.000141157	0.0772623	5.75219e-12	4	5	5	5	258	288	119	351	5.89587	19.4215	25.9083	13.0433	43.793
NM_145575	Cald1	chr6	4	0	4	0.719113	0.75	0.782609	0.817886	1.29138e-42	6.78779e-66	1.24307e-57	1.33858e-118	18	19	19	19	955	1143	767	1242	10.5919	60.5026	73.8587	71.5356	109.052
NM_009790	Calm1	chr12	4	0	0	0.630617	0.693617	0.626016	0.559426	1.83173e-30	4.74974e-41	2.45857e-15	0.000228681	18	18	18	18	1946	1195	1007	990	1002.62	317.62	221.148	156.735	272.371
NM_007589	Calm2	chr17	4	0	0	0.5	0.596154	0.358974	0.609524	1	0.211609	0.108129	0.0313018	1	1	1	1	149	52	40	106	1869.6	1108.38	722.883	598.79	767.172
NM_007590	Calm3	chr7	4	0	0	0.564556	0.554688	0.559433	0.570344	6.14146e-09	0.0027211	0.000356584	6.32255e-09	6	6	6	6	2060	774	928	1731	1046.2	312.1	178.519	230.429	395.516
NM_184053	Calu	chr6	0	0	0	NA	NA	0.75	NA	NA	NA	0.625	NA	0	0	1	0	NA	NA	4	NA	2.92002	15.9479	7.52442	11.1606	11.0545
NM_133926	Camk1	chr6	4	0	1	0.401316	0.575758	0.714286	0.56044	0.000689528	0.267812	0.00380165	0.29447	1	1	1	1	305	67	52	92	62.5873	257.648	56.399	105.495	134.063
NM_177343	Camk1d	chr2	2	0	0	0.361582	0.421053	0.541667	0.539326	0.00028466	0.647606	0.83882	0.525015	22	3	7	17	177	19	24	91	28.4399	4.05109	1.40189	1.62017	4.34131
NM_144817	Camk1g	chr1	4	0	2	0.27381	0.293651	0.463158	0.543779	9.28813e-29	4.09929e-06	0.538394	0.221651	11	10	11	11	598	128	95	217	11.0345	51.5341	14.7154	11.3082	31.8111
NM_177407	Camk2a	chr18	0	0	0	NA	0	NA	NA	NA	0.015625	NA	NA	0	2	0	0	NA	7	NA	NA	97.1525	0.0455891	0.811075	NA	0.0363208
NM_001174053	Camk2b	chr11	1	0	0	0.198276	0.490798	0.714286	0.5	3.59715e-11	0.875581	0.453125	1	1	1	1	1	116	165	7	21	1.41416	2.57838	4.27136	0.243167	0.606156
NM_028420	Camk2n2	chr16	0	0	0	0.428571	0.8	1	0.25	1	0.375	0.125	0.625	1	1	1	1	7	5	5	4	33.3598	1.71834	3.44903	1.31345	1.75513
NM_009793	Camk4	chr18	0	0	0	0.472441	0.333333	0.142857	0.419355	0.594615	0.387695	0.00148964	0.47313	18	3	6	9	128	12	23	31	54.462	2.33617	0.782358	1.63146	1.21162
NM_018883	Camkk1	chr11	1	0	1	0.254545	0.214286	0.736842	0.333333	2.51941e-07	0.057373	0.0635681	1	13	3	6	1	112	14	19	3	35.7712	6.00694	2.7955	2.67077	1.04321
NM_145358	Camkk2	chr5	4	0	4	0.735216	0.753108	0.721774	0.74359	1.84031e-58	1.72561e-34	1.93549e-12	1.46307e-22	20	20	20	20	1147	570	250	394	43.4514	39.0558	27.0203	12.2689	19.4197
NM_007596	Caml	chr13	4	0	0	0.565041	0.637037	0.584158	0.517007	0.0478788	0.00183779	0.110918	0.741592	5	6	6	5	247	135	101	150	29.2832	33.6792	25.8512	25.6222	33.3537
NM_001115076	Camsap1	chr2	4	0	0	0.537879	0.512195	0.518519	0.533333	0.242201	0.78004	0.694567	0.522991	17	15	17	16	266	206	164	121	20.1125	9.7776	13.2612	10.653	8.15645
NM_001081360	Camsap1l1	chr1	4	0	1	0.196752	0.441201	0.534188	0.36701	1.32263e-186	5.1774e-05	0.000173721	1.03603e-16	33	33	33	33	2178	1217	3094	980	49.473	49.64	35.372	96.6439	35.067
NM_178116	Camta2	chr11	1	0	0	0.177778	0.636364	0.5	0.357143	1.53741e-05	0.0580641	1	0.42395	7	10	9	4	45	55	44	14	18.6089	2.67713	4.25963	2.93232	1.6902
NM_027994	Cand1	chr10	4	0	0	0.495192	0.557411	0.495108	0.557864	0.883086	0.0135296	0.85957	0.0382953	25	21	26	22	423	482	524	343	34.0532	19.4866	28.3028	32.3552	26.3354
NM_025958	Cand2	chr6	4	0	0	0.533156	0.586538	0.663043	0.557895	0.216382	0.00263827	1.15338e-05	0.304885	28	25	22	20	379	317	188	95	2.95374	10.0892	9.53875	8.20737	4.35738
NM_029502	Cant1	chr11	0	0	0	0.6	0.666667	0.888889	0.857143	1	1	0.0390625	0.125	1	1	1	1	5	3	9	7	0.692	0.672217	0.850447	0.878909	0.714074
NM_007598	Cap1	chr4	4	0	0	0.636107	0.574316	0.583472	0.611753	7.98486e-25	1.84189e-05	8.2937e-09	6.04558e-13	8	8	8	8	1435	853	1219	1045	124.021	125.574	113.418	185.283	149.88
NM_026056	Cap2	chr13	4	2	2	0.998907	0.782211	0.741935	0.951289	6.61423e-273	3.67199e-90	5.84629e-23	1.17758e-152	32	36	30	32	924	1215	409	707	121.502	22.9517	44.0504	18.2391	26.8611
NM_011796	Capn10	chr1	4	0	1	0.297959	0.630769	0.627119	0.492754	2.18894e-10	0.0463535	0.0674446	1	6	6	6	6	246	65	61	70	8.97371	22.9906	10.7583	8.10147	9.63536
NM_009794	Capn2	chr1	4	0	0	0.400982	0.546025	0.633495	0.501211	1.11691e-06	0.0490957	6.62433e-08	1	9	9	8	8	615	488	414	415	22.1178	42.9534	49.3469	49.0002	43.6875
NM_007602	Capn5	chr7	4	0	2	0.719697	0.684834	0.748466	0.616	4.63854e-07	2.29399e-14	1.54503e-10	0.011959	18	19	18	17	134	429	165	126	11.172	3.93128	17.4056	8.31785	6.16207
NM_007603	Capn6	chrX	2	2	0	0	0	1	0	0.00012207	0.125	6.22302e-61	0.00390625	1	1	1	1	14	4	203	9	1.21924	8.15558	1.40288	128.084	8.15676
NM_009796	Capn7	chr14	4	0	1	0.5	0.727273	0.333333	0.354839	1	0.0524788	0.0532519	0.149613	3	2	3	3	56	23	40	33	24.8852	27.3621	21.2668	27.4755	24.7692
NM_009795	Capns1	chr7	4	0	1	0.713029	0.66171	0.697203	0.66042	4.11593e-99	1.2596e-51	1.4163e-87	1.32157e-62	12	11	12	12	2418	2176	2499	2694	102.489	157.802	279.242	235.565	314.066
NM_181541	Caprin2	chr6	3	0	0	0.46087	0.540541	0.857143	0.461538	0.455814	0.742829	0.00148964	0.845019	13	7	4	6	115	38	23	26	3.66885	6.20922	4.82453	2.73375	3.58397
NM_178278	Caps2	chr10	0	0	0	0.714286	NA	NA	NA	0.453125	NA	NA	NA	2	0	0	0	7	NA	NA	NA	0.48456	0.429777	0.349538	0.0642198	0.0978294
NM_009797	Capza1	chr3	4	0	0	0.513233	0.565445	0.526365	0.498789	0.231824	1.04644e-05	0.0914179	0.954692	17	17	17	17	2136	1153	1082	1243	20.69	59.9942	45.2042	51.4722	56.679
NM_007604	Capza2	chr6	4	0	0	0.4875	0.63871	0.602339	0.568254	0.695631	0.000691662	0.00912208	0.0178204	3	3	3	3	324	155	175	316	138.37	56.9115	53.3935	91.1223	96.8915
NM_028296	Car10	chr11	0	0	0	NA	0.75	NA	0.833333	NA	0.289062	NA	0.00753784	0	2	0	4	NA	8	NA	18	27.6783	NA	1.8085	0.0265817	2.67256
NM_009800	Car11	chr7	2	0	0	NA	0.555556	0.75	0.545455	NA	0.701108	0.625	1	0	1	1	1	NA	27	4	11	86.393	1.5298	19.4285	5.6005	9.50032
NM_178396	Car12	chr9	0	0	0	0	NA	NA	NA	0.25	NA	NA	NA	1	0	0	0	3	NA	NA	NA	8.86686	0.3345	0.605929	0.0954222	0.0726808
NM_024495	Car13	chr3	0	0	0	NA	0.333333	NA	NA	NA	1	NA	NA	0	1	0	0	NA	3	NA	NA	1.10022	NA	1.39876	0.346938	0.352339
NM_009801	Car2	chr3	4	0	1	0.479029	0.539313	0.238095	0.446809	0.397737	0.0197846	0.0266037	0.0129096	7	8	5	7	455	908	21	566	159.223	58.2836	137.792	6.93143	112.78
NM_007606	Car3	chr3	0	0	0	0.4	0.111111	NA	NA	1	0.0390625	NA	NA	1	1	0	0	5	9	NA	NA	0.342266	1.84712	7.30853	NA	1.53046
NM_181315	Car5b	chrX	4	4	0	0	0.00684932	1	0	4.48416e-44	3.29585e-42	1.33638e-51	4.11805e-84	9	7	10	10	145	147	173	280	4.43653	4.08029	6.76362	11.0297	13.6558
NM_007592	Car8	chr4	1	1	0	NA	0.307692	0.875	NA	NA	0.266846	1.4016e-15	NA	0	2	7	0	NA	13	106	NA	2.7844	0.148073	0.786797	5.4983	0.0786465
NM_130859	Card10	chr15	0	0	0	NA	0.25	NA	NA	NA	0.145996	NA	NA	0	3	0	0	NA	12	NA	NA	2.93319	0.107522	0.935207	0.0749774	0.0761447
NM_001163138	Card6	chr15	2	2	0	0.148148	NA	0.0769231	0	0.000310749	NA	0.00341797	0.25	2	0	2	1	27	NA	13	3	0.859824	4.93666	0.922639	3.59892	1.33088
NM_139150	Carf	chr1	4	0	1	0.225806	0.469388	0.558824	0.464286	1.74285e-05	0.613734	0.607591	0.68888	7	8	6	8	63	99	34	56	9.4679	4.85892	6.54512	3.26722	6.42879
NM_025821	Carhsp1	chr16	4	0	0	0.557235	0.606846	0.611613	0.620497	9.19594e-07	2.19151e-12	5.51971e-10	3.26621e-22	17	17	17	17	1870	1093	796	1626	20.1546	81.7039	70.2352	54.1881	112.433
NM_026995	Carkd	chr8	4	0	0	0.582609	0.582822	0.651515	0.532609	0.0145204	0.00326977	2.40868e-05	0.417479	8	6	6	6	230	328	200	185	28.9636	29.6524	45.3051	45.8535	39.0785
NM_134148	Carns1	chr19	0	0	0	0.636364	NA	1	0.75	0.548828	NA	0.25	0.625	3	0	1	1	11	NA	3	4	3.31348	0.925749	0.385144	0.469261	0.771584
NM_013742	Cars	chr7	4	0	0	0.621302	0.533333	0.590476	0.586022	2.9866e-10	0.390209	0.078485	0.0227676	7	7	7	7	680	196	105	186	15.6625	59.6869	26.8079	17.1402	26.4107
NM_024248	Cars2	chr8	4	0	0	0.612121	0.376623	0.486842	0.349206	0.00491635	0.0395395	0.908777	0.022575	4	4	4	4	166	77	76	63	8.86352	27.815	17.5997	16.3354	18.1952
NM_138660	Casc3	chr11	4	0	1	0.296552	0.55814	0.54321	0.553846	1.05034e-06	0.217561	0.505236	0.457021	7	6	7	6	146	131	81	66	21.3429	17.2383	25.3298	15.2284	11.7855
NM_145398	Casd1	chr6	4	2	0	0.513158	0.529126	0.115385	0.0662651	0.573053	0.443512	2.84856e-20	1.08287e-33	10	10	9	10	535	208	131	166	40.27	28.4978	12.2943	9.05089	11.5855
NM_009806	Cask	chrX	4	4	0	0.00796813	0	0.998851	0.00730994	4.02588e-142	1.06449e-109	2.21285e-259	3.08638e-194	14	14	14	15	509	374	883	689	23.8454	30.3013	37.7533	77.5803	62.8539
NM_080643	Caskin2	chr11	4	0	0	0.35	0.603261	0.638743	0.691489	0.00351764	0.0062239	0.000153841	0.000261683	16	25	24	19	102	188	194	97	3.58956	3.69628	7.23578	9.34655	4.40294
NM_009808	Casp12	chr9	4	0	1	0.716981	0.487805	0.604651	0.623762	0.00219019	0.912157	0.0661526	0.0165059	4	4	4	4	53	84	87	101	1.0491	6.30983	10.462	11.5329	21.0756
NM_007610	Casp2	chr6	4	0	0	0.447853	0.535484	0.612676	0.55814	0.209995	0.421939	0.00904325	0.331834	12	12	11	11	164	157	144	86	5.69214	8.77531	13.3255	13.4611	8.26479
NM_009810	Casp3	chr8	4	0	0	0.513986	0.530612	0.473333	0.537549	0.679007	0.613734	0.567775	0.257738	4	4	4	4	287	98	151	257	16.1431	87.2279	37.7415	65.2662	115.268
NM_007609	Casp4	chr9	0	0	0	NA	NA	0	NA	NA	NA	0.25	NA	0	0	1	0	NA	NA	3	NA	1.17756	0.433892	1.06668	3.40383	0.314256
NM_009811	Casp6	chr3	4	0	0	0.547872	0.502762	0.57619	0.566176	0.0709352	1	0.0321726	0.0336303	10	10	10	9	379	182	212	273	4.09628	23.021	16.2998	18.6992	25.0524
NM_007611	Casp7	chr19	4	0	0	0.634615	0.637755	0.562874	0.565217	0.000966133	0.000140232	0.121448	0.147592	10	10	10	10	156	198	167	141	2.87147	11.0132	16.0514	15.2799	16.3224
NM_015733	Casp9	chr4	4	0	0	0.627092	0.622449	0.573604	0.480916	1.7965e-19	6.59239e-08	0.00402683	0.348377	71	58	55	61	1267	496	402	659	22.35	13.4398	8.04763	8.80319	11.9434
NM_009817	Cast	chr13	4	0	0	0.510753	0.5	0.580986	0.391304	0.716708	1	0.0074706	0.0247935	11	10	11	11	373	66	288	115	4.67147	15.5363	3.88913	17.8227	8.61466
NM_009804	Cat	chr2	4	0	1	0.627981	0.743922	0.61179	0.579247	1.41767e-10	2.0888e-68	7.03844e-17	3.02398e-06	12	12	12	12	633	1247	1411	884	28.1162	36.5126	113.642	126.525	87.7803
NM_007616	Cav1	chr6	2	0	0	NA	0.433333	0.328072	NA	NA	0.366294	2.54319e-48	NA	0	9	19	0	NA	60	1801	NA	13.4438	0.272545	5.85094	113.96	0.687598
NM_016900	Cav2	chr6	4	1	3	0.795591	0.790476	0.762136	0.994785	4.13089e-42	6.68344e-51	3.6452e-157	0	12	12	13	12	506	638	2503	1545	21.7023	18.4096	27.9574	160.69	70.4229
NM_144822	Cbara1	chr10	4	0	0	0.409795	0.420958	0.556444	0.535668	1.13195e-18	8.16903e-17	0.000169737	0.00548998	23	23	23	23	2410	2806	1142	1560	53.3783	72.9038	119.707	50.937	82.6413
NM_009823	Cbfa2t2	chr2	0	0	0	NA	NA	0	NA	NA	NA	0.25	NA	0	0	1	0	NA	NA	3	NA	0.0430578	0.0464743	0.0264584	0.116667	0.0148104
NM_172860	Cbfa2t2	chr2	0	0	0	0.333333	NA	0	NA	0.6875	NA	0.125	NA	1	0	1	0	6	NA	4	NA	0.186492	0.213676	0.105781	0.276948	0.0444094
NM_007619	Cbl	chr9	4	0	0	0.542662	0.52521	0.506061	0.576923	0.160772	0.291781	0.868862	0.0313499	16	15	16	16	295	481	332	209	15.5292	12.146	29.9401	21.8115	14.732
NM_001033238	Cblb	chr16	4	0	0	0.540541	0.496403	0.511628	0.307692	0.561381	1	1	0.0237027	9	11	8	8	75	141	44	40	7.6616	3.93125	9.35935	4.10734	3.82961
NM_134048	Cbll1	chr12	3	0	0	0.666667	0.417391	0.625	0.5	0.237885	0.0928159	0.307456	1	3	3	3	1	18	115	25	6	8.49675	4.71214	39.1152	11.2568	4.35967
NM_019820	Cbln3	chr14	0	0	0	0.333333	NA	NA	NA	1	NA	NA	NA	1	0	0	0	3	NA	NA	NA	1.66205	0.538179	0.391501	0.112585	0.323957
NM_007620	Cbr1	chr16	4	3	0	0.983845	0.883152	0.578544	0.989691	1.97714e-165	1.05737e-54	0.000382491	1.23693e-27	10	10	10	10	623	372	527	97	43.4894	40.3389	31.7559	52.7149	8.57568
NM_173047	Cbr3	chr16	3	0	1	0.378049	0.2	0.230769	0.333333	0.0352414	0.375	0.0922852	0.237885	2	1	2	1	84	5	13	20	9.77431	78.1875	19.8571	36.711	60.0535
NM_145595	Cbr4	chr8	4	0	0	0.6	0.623529	0.609375	0.639175	0.105342	0.0294564	0.103422	0.00795946	6	6	6	6	75	85	65	98	14.7063	11.297	14.4925	15.1017	19.2114
NM_144855	Cbs	chr17	0	0	0	NA	0.615385	NA	NA	NA	0.581055	NA	NA	0	1	0	0	NA	13	NA	NA	0.985953	NA	1.49616	NA	NA
NM_178224	Cbs	chr17	1	0	1	NA	0.75	NA	NA	NA	0.0413895	NA	NA	0	1	0	0	NA	20	NA	NA	0.417795	NA	3.8396	NA	0.0380402
NM_146097	Cbwd1	chr19	4	0	0	0.666667	0.439024	0.536585	0.469388	0.00630983	0.532709	0.755229	0.77545	3	3	3	3	74	41	41	49	10.5241	15.4274	7.37773	14.8459	13.5037
NM_007622	Cbx1	chr11	4	0	1	0.320388	0.5	0.833333	0.611111	0.000340998	1	0.0385742	0.480682	1	1	1	1	104	24	13	19	22.1817	88.8507	37.9252	41.9465	37.7956
NM_007623	Cbx2	chr11	4	0	4	0.212121	0.772727	0.714286	0.25	6.88232e-09	0.0169005	0.0783539	0.0768127	4	2	3	4	99	23	21	16	1.20492	13.8041	6.10477	4.28899	3.00812
NM_007624	Cbx3	chr6	4	0	0	0.523069	0.507576	0.539914	0.509321	0.0382798	0.529965	0.000636345	0.46195	9	9	9	9	2081	1870	1870	1675	109.57	147.149	145.583	170.365	143.965
NM_007625	Cbx4	chr11	4	0	0	0.306748	0.585253	0.585938	0.492308	8.85789e-07	0.0143433	0.0630088	1	8	8	8	7	165	219	131	67	10.9984	6.48865	12.2981	9.39608	6.04407
NM_028763	Cbx6	chr15	4	0	0	0.548774	0.618343	0.648627	0.568801	3.20518e-05	8.07799e-10	7.8769e-26	4.34681e-07	34	32	34	32	1854	686	1249	1372	81.2876	37.2973	19.7259	34.3173	39.0966
NM_013926	Cbx8	chr11	4	0	0	0.358696	0.631579	0.3125	0.514286	0.00878093	0.359283	0.210114	1	6	5	4	4	96	22	16	35	3.73595	10.1373	4.5593	3.75361	5.42732
NM_028634	Cby1	chr15	4	0	1	0.534483	0.555288	0.717391	0.576302	0.0747501	0.0272427	3.27663e-11	0.00036322	13	13	12	13	707	424	233	560	25.4881	53.3048	36.4251	26.4524	63.3801
NM_145970	Cc2d1a	chr8	2	0	0	0.428571	0.4375	0.454545	0.333333	1	0.803619	1	0.6875	1	1	1	1	7	16	11	6	10.5843	3.93402	6.23492	10.0267	4.68081
NM_177045	Cc2d1b	chr4	4	0	0	0.592105	0.594595	0.623794	0.59893	0.000387164	0.00278753	1.48901e-05	0.00829969	12	12	12	12	386	262	314	187	8.63537	19.2867	15.5356	23.4369	16.2422
NM_172274	Cc2d2a	chr5	4	0	0	0.498674	0.671264	0.618729	0.600619	1	7.71497e-13	4.78435e-05	0.000354344	27	28	25	28	380	437	300	323	6.94698	8.52206	11.9799	9.73177	11.6894
NM_026201	Ccar1	chr10	4	0	0	0.592417	0.504032	0.512315	0.539877	0.000171223	0.949385	0.778988	0.347293	7	7	7	7	426	249	208	164	15.2903	30.5644	25.3251	24.116	16.6896
NM_178793	Ccbe1	chr18	2	1	0	0.692308	0.387255	NA	0.144068	0.266846	6.08958e-06	NA	2.88938e-30	3	14	0	13	13	411	NA	236	1.45317	0.806646	22.1776	0.370421	15.408
NM_172404	Ccbl1	chr2	4	0	0	0.523077	0.629032	0.416667	0.623188	0.804317	0.0558972	0.245061	0.0532894	5	7	7	8	65	63	60	69	9.14216	6.04776	10.7387	6.3105	11.227
NM_173763	Ccbl2	chr3	3	0	0	0.586957	0.511628	0.142857	0.409091	0.301996	1	0.125	0.523467	4	5	2	3	46	44	7	22	5.8898	6.56392	6.69352	2.91991	5.97081
NM_029339	Ccdc101	chr7	3	0	0	0.488372	0.75	0.47619	0.470588	1	0.289062	1	1	1	1	1	1	44	8	21	17	16.4958	29.8182	16.7688	16.8879	16.301
NM_025740	Ccdc104	chr11	4	0	1	0.297297	0.409091	0.46988	0.492958	8.87305e-07	0.523467	0.660884	1	1	1	1	1	150	22	84	71	111.083	75.9561	44.4462	68.606	58.4458
NM_146178	Ccdc106	chr7	1	1	0	1	0.75	NA	NA	4.76837e-07	0.625	NA	NA	2	1	0	0	22	4	NA	NA	17.2933	4.03061	1.9256	0.707571	0.53894
NM_001037913	Ccdc107	chr4	4	0	0	0.584775	0.523585	0.632353	0.551471	0.00466555	0.536595	0.00255873	0.264893	5	5	5	5	290	214	141	137	29.5995	34.0807	28.0443	19.9231	25.8148
NM_001033259	Ccdc109a	chr10	4	0	0	0.39375	0.373134	0.363636	0.5125	0.00887359	0.00418753	0.0220335	0.911072	6	6	6	6	160	137	78	80	16.6514	17.1082	27.2876	14.5111	13.5352
NM_025779	Ccdc109b	chr3	2	0	1	0.766667	0.5	0.666667	1	0.00522288	1	0.301758	0.25	5	1	3	1	30	4	15	3	2.62501	3.29995	1.21994	3.22756	1.02431
NM_001001184	Ccdc111	chr8	0	0	0	0	0.333333	NA	NA	0.25	1	NA	NA	1	1	0	0	3	3	NA	NA	0.689129	2.15705	1.10099	1.26038	1.04296
NM_001160399	Ccdc112	chr18	1	0	0	0.375	0.5	0.4	0.666667	0.15386	1	0.202639	0.6875	5	5	6	1	41	32	50	6	5.45973	2.35942	2.35355	3.32219	1.3817
NM_027159	Ccdc115	chr1	4	0	0	0.332349	0.488584	0.665138	0.552486	1.80474e-18	0.787007	1.22814e-06	0.180762	9	10	8	9	683	220	220	181	14.6392	44.8167	17.2205	22.4159	18.5922
NM_134033	Ccdc117	chr11	4	0	1	0.33913	0.846154	0.571429	0.609756	0.000717191	0.000533521	0.349682	0.211024	7	3	5	6	117	26	58	42	6.7277	13.5856	4.6331	8.39068	8.41545
NM_028312	Ccdc12	chr9	4	0	0	0.487179	0.465217	0.404762	0.55	0.716575	0.322633	0.0400358	0.235582	4	3	3	3	274	235	128	165	34.4628	64.2688	56.9619	48.6348	50.0505
NM_207202	Ccdc120	chrX	0	0	0	0	0	1	NA	0.25	0.125	0.03125	NA	1	1	2	0	3	4	6	NA	2.97044	1.8306	1.83265	1.75251	0.889895
NM_028120	Ccdc123	chr7	4	0	0	0.516779	0.648	0.505051	0.379747	0.602193	0.0011925	1	0.0421654	15	14	12	11	303	127	100	79	5.75356	15.9531	9.55205	8.5965	6.73182
NM_026964	Ccdc124	chr8	4	0	0	0.549618	0.577381	0.58871	0.564246	0.0551191	0.0534324	0.0588759	0.099833	4	4	4	4	397	172	126	180	71.6787	114.148	76.6874	93.9738	103.044
NM_175098	Ccdc126	chr6	3	0	1	0.454545	0.571429	0.238095	0.466667	0.728332	1	0.0266037	0.765992	5	2	4	7	34	8	22	45	7.13078	3.50699	1.62841	4.13654	4.75577
NM_001168658	Ccdc127	chr13	1	1	0	0.822917	0.859729	0.6875	0.742857	9.94151e-11	4.48609e-29	0.0501025	5.84955e-05	15	16	7	11	96	224	33	70	4.28814	1.44079	3.6549	1.23024	1.90532
NM_024260	Ccdc132	chr6	0	0	0	NA	0.4	NA	NA	NA	1	NA	NA	0	1	0	0	NA	5	NA	NA	0.785357	0.344055	0.681303	0.680635	0.309862
NM_172428	Ccdc134	chr15	4	0	0	0.449627	0.393443	0.628235	0.473934	0.021977	0.0232164	1.38982e-07	0.491274	13	12	14	14	542	123	431	211	6.18436	29.9964	10.693	34.7126	15.492
NM_145574	Ccdc136	chr6	3	1	0	0.0916031	0.404959	0.4	0.363636	2.587e-23	0.00372997	1	0.548828	5	6	1	3	133	242	5	11	35.2143	17.704	36.2034	0.970581	3.07442
NM_152807	Ccdc137	chr11	4	0	1	0.291328	0.462025	0.530612	0.469214	2.08199e-59	0.195638	0.215635	0.196938	20	20	20	20	1487	319	447	478	12.1289	48.3571	13.3455	19.4978	21.9543
NM_001162956	Ccdc138	chr10	1	0	0	0.453704	0.454545	0.307692	0.25	0.386573	1	0.266846	0.625	11	2	4	1	108	12	13	4	4.33036	3.75955	2.05552	1.18692	0.401799
NM_172824	Ccdc14	chr16	4	0	0	0.432234	0.43617	0.42735	0.414894	0.0291594	0.256442	0.138753	0.121371	14	11	14	11	276	94	119	95	1.8901	8.8709	4.36519	5.58886	4.29525
NM_001025576	Ccdc141	chr2	3	1	1	0.657895	0.759494	0.3	1	1.60314e-05	4.19819e-11	0.115318	3.38813e-21	8	8	5	7	190	158	20	69	5.99119	8.82511	8.22312	2.29112	5.09197
NM_001081266	Ccdc142	chr6	4	0	0	0.491228	0.466667	0.461538	0.37931	1	1	1	0.264931	5	3	3	4	57	15	13	31	4.27416	5.7225	3.77689	3.48375	5.35013
NM_001001178	Ccdc148	chr2	0	0	0	NA	0.647059	NA	NA	NA	0.332306	NA	NA	0	4	0	0	NA	17	NA	NA	6.74299	0.144278	0.55444	0.226369	0.344839
NM_001081429	Ccdc15	chr9	0	0	0	0.833333	0	NA	0.5	0.0385742	0.0625	NA	1	2	1	0	1	12	5	NA	4	0.767048	1.71458	2.41752	5.68195	1.12344
NM_029939	Ccdc151	chr9	0	0	0	NA	0	NA	NA	NA	0.000244141	NA	NA	0	2	0	0	NA	13	NA	NA	0.344066	0.12855	0.805036	0.322707	0.0409663
NM_001034059	Ccdc160	chrX	0	0	0	0	NA	NA	NA	0.25	NA	NA	NA	1	0	0	0	3	NA	NA	NA	3.57741	0.404514	0.261699	0.346185	0.0585957
NM_026714	Ccdc163	chr4	4	0	0	0.561224	0.436364	0.5	0.697674	0.266406	0.418754	1	0.0137182	5	5	5	5	98	56	38	43	2.82593	15.5403	10.728	9.41714	10.6758
NM_001037916	Ccdc17	chr4	0	0	0	0.666667	NA	NA	NA	1	NA	NA	NA	1	0	0	0	3	NA	NA	NA	3.19331	0.733204	1.24424	0.398208	0.853748
NM_138603	Ccdc22	chrX	4	4	0	0	0	1	0	1.06911e-50	7.10543e-15	1.13687e-13	2.27374e-13	3	3	3	3	169	48	45	43	14.7043	30.7212	15.2877	15.7526	12.4073
NM_145944	Ccdc25	chr14	4	0	0	0.558233	0.542484	0.480226	0.364286	0.0757812	0.331993	0.652122	0.00166751	12	10	12	12	250	157	177	141	26.0579	15.1675	13.9705	16.2761	14.3067
NM_144820	Ccdc28a	chr10	4	0	1	0.455882	0.254902	0.52	0.578947	0.544612	0.000621043	0.887725	0.289244	6	6	6	6	70	52	51	58	37.9253	6.20075	5.10218	7.98066	7.56458
NM_028804	Ccdc3	chr2	0	0	0	NA	NA	0.172414	NA	NA	NA	0.000546113	NA	0	0	6	0	NA	NA	30	NA	9.68026	0.106255	0.30246	2.06721	0.101584
NM_029286	Ccdc30	chr4	0	0	0	1	0	NA	NA	0.03125	0.125	NA	NA	2	1	0	0	6	4	NA	NA	9.9052	0.490011	1.42655	0.104838	0.283921
NM_199310	Ccdc32	chr2	4	0	0	0.512579	0.467742	0.52071	0.533937	0.694724	0.529769	0.644542	0.346346	11	8	9	11	322	125	170	221	29.7888	19.664	10.8338	15.9712	19.8777
NM_026613	Ccdc34	chr2	4	0	0	0.514286	0.55615	0.649007	0.428571	0.591496	0.143389	0.000312425	0.254305	6	6	6	5	424	191	151	78	6.49502	27.1682	18.1147	13.27	12.74
NM_173775	Ccdc37	chr6	1	0	0	0	0.477612	NA	NA	0.000488281	0.807195	NA	NA	3	4	0	0	12	67	NA	NA	4.40385	1.21473	15.8984	0.704346	1.26231
NM_026222	Ccdc39	chr3	0	0	0	1	1	1	1	0.03125	0.00390625	0.25	0.125	2	3	1	1	6	9	3	4	6.65734	1.65581	1.62299	1.34798	1.12006
NM_029852	Ccdc41	chr10	4	0	0	0.577406	0.563177	0.571429	0.56	0.000823123	0.0408725	0.107988	0.130335	13	13	10	13	482	280	143	178	20.6417	21.546	17.4734	10.2691	13.5336
NM_025918	Ccdc43	chr11	3	0	0	0.314286	0	0.421053	0.583333	0.00254756	0.25	0.647606	0.541256	3	1	3	2	70	3	19	25	11.5185	28.8423	9.72253	13.2147	19.3895
NM_029606	Ccdc46	chr11	1	0	0	0.625	0.428571	NA	NA	0.15386	0.790527	NA	NA	4	3	0	0	40	14	NA	NA	1.05919	3.49993	1.40678	0.355917	0.361458
NM_026009	Ccdc47	chr11	4	0	0	0.401747	0.572202	0.547398	0.603093	2.97691e-09	0.000774897	0.0020626	7.44266e-07	16	16	16	16	919	558	1094	588	63.7253	95.3226	54.6619	134.237	85.8168
NM_026202	Ccdc50	chr16	0	0	0	NA	0.625	0.684211	NA	NA	0.454498	0.167068	NA	0	2	3	0	NA	16	19	NA	0.470608	0.78485	1.3589	1.26949	0.348099
NM_025689	Ccdc51	chr9	3	0	1	0.532407	0.478261	0.72973	0.478873	0.376447	1	0.00763208	0.812589	8	5	5	7	219	23	37	71	2.23177	9.66158	2.38129	3.58634	5.18165
NM_144550	Ccdc52	chr16	4	0	0	0.553254	0.527273	0.548387	0.625	0.0567821	0.633756	0.525773	0.0246228	15	14	13	13	338	111	65	88	4.98844	10.5243	5.73977	3.06161	5.05775
NM_001122960	Ccdc53	chr10	0	0	0	0.4	0.285714	0.2	0.333333	1	0.179565	0.109375	0.387695	1	1	1	1	5	14	10	12	0.472968	0.486473	1.84636	1.78095	1.46416
NM_001012309	Ccdc55	chr11	4	0	0	0.326599	0.567347	0.5	0.535714	2.26288e-09	0.0406947	1	0.585647	12	11	13	13	300	248	135	84	5.38711	8.99695	9.86205	6.83031	5.3759
NM_026618	Ccdc56	chr11	4	0	0	0.323308	0.435754	0.604167	0.50173	2.53543e-16	0.099833	0.0153705	1	2	2	2	2	542	179	147	291	102.608	191.482	109.17	88.8702	153.181
NM_027745	Ccdc57	chr11	0	0	0	0.888889	0.548387	0.428571	0.882353	0.00131226	0.7201	0.790527	0.00234985	5	8	3	5	18	31	14	17	2.53	1.74953	2.5375	1.98684	1.64607
NM_025602	Ccdc59	chr10	4	0	0	0.5	0.551402	0.545455	0.509091	1	0.333705	0.363363	0.839771	5	5	5	5	344	107	124	220	14.9683	30.024	26.0273	25.6498	35.901
NM_001111121	Ccdc6	chr10	4	0	0	0.508651	0.548057	0.538462	0.534091	0.81403	0.0373996	0.226039	0.407087	17	17	19	15	291	494	278	177	14.5553	13.2423	26.5937	16.2741	14.0288
NM_001033314	Ccdc61	chr7	4	0	0	0.514851	0.52381	0.428571	0.433333	0.725085	0.801306	0.391603	0.366294	7	5	5	7	204	64	50	61	1.9527	18.9688	6.55949	6.39323	10.1197
NM_001080808	Ccdc64	chr5	0	0	0	NA	0	0	NA	NA	0.25	0.25	NA	0	1	1	0	NA	3	3	NA	11.9244	0.365795	0.737558	0.334789	0.777144
NM_153518	Ccdc65	chr15	0	0	0	NA	NA	NA	0.25	NA	NA	NA	0.625	0	0	0	1	NA	NA	NA	4	8.14742	0.240746	0.556803	0.708231	0.959009
NM_177111	Ccdc66	chr14	4	0	0	0.491803	0.555556	0.520833	0.642857	1	0.617719	0.885433	0.184933	5	5	5	4	61	38	49	29	11.6116	7.94859	9.83745	7.74174	6.97508
NM_133744	Ccdc71	chr9	4	0	0	0.583658	0.510448	0.559028	0.58805	0.000171822	0.743107	0.051641	0.00199348	17	14	17	17	516	337	289	321	12.0953	22.972	17.6928	18.4489	24.5858
NM_183250	Ccdc72	chr9	4	0	0	0.504918	0.480132	0.410557	0.507109	0.83959	0.526816	0.00112654	0.807734	2	2	2	2	615	306	345	424	190.644	222.481	156.623	196.585	208.971
NM_177600	Ccdc73	chr2	0	0	0	0.291667	0.333333	0.571429	0.5	0.0639147	1	0.663624	1	5	1	5	4	24	3	21	14	4.80628	0.873626	1.20265	2.15716	1.20947
NM_001166164	Ccdc74a	chr16	0	0	0	NA	NA	NA	0.888889	NA	NA	NA	0.0390625	0	0	0	2	NA	NA	NA	9	7.37654	0.928883	1.19615	1.31859	2.39632
NM_030016	Ccdc76	chr3	1	0	0	0.336538	0.384615	0.444444	0.133333	0.00110862	0.581055	0.617719	5.94761e-05	11	2	8	5	106	14	36	31	4.61091	3.25427	1.27246	1.68325	1.85191
NM_026028	Ccdc77	chr6	4	0	0	0.44	0.5	0.65	0.461538	0.355699	1	0.263176	1	3	3	3	3	75	24	20	13	1.94629	16.9507	7.38613	7.11933	7.0224
NM_001165929	Ccdc78	chr17	0	0	0	0.333333	0.384615	0.25	0	0.301758	0.581055	0.0768127	0.25	4	2	1	1	15	13	17	3	4.20871	1.57378	2.28862	2.2545	1.19931
NM_201372	Ccdc84	chr9	3	1	0	0.621622	0.5	1	0.6	0.187742	1	0.000976562	1	3	3	2	1	38	14	11	5	6.352	15.9992	7.77557	9.33683	5.98466
NM_198616	Ccdc85b	chr19	0	0	0	0.733333	0.6	0.6	0.5	0.118469	1	1	1	1	1	1	1	16	5	5	4	0.821775	1.37768	0.641391	1.03027	0.574444
NM_001159910	Ccdc85c	chr12	4	0	1	0.612245	0.244444	0.415094	0.538462	0.152408	0.000824082	0.271679	1	4	4	5	2	50	45	55	13	11.7648	5.69596	4.52118	5.67143	4.77068
NM_023731	Ccdc86	chr19	4	0	0	0.535294	0.492806	0.428571	0.587629	0.398927	0.85725	0.188847	0.103769	9	9	9	9	172	281	98	97	2.60433	6.24475	10.762	6.40402	4.94522
NM_176841	Ccdc88a	chr11	4	0	0	0.393528	0.474277	0.55042	0.539906	4.61049e-11	0.213839	0.00783743	0.0478473	20	20	20	20	963	624	719	647	20.4036	23.9064	22.5766	29.6336	28.647
NM_026681	Ccdc88c	chr12	4	0	1	0.705128	0.636842	0.615385	0.46	2.99885e-10	0.000198376	0.000164772	0.484118	24	22	24	19	238	192	278	100	3.99231	6.22124	8.06238	13.085	4.47726
NM_001136471	Ccdc9	chr7	0	0	0	0.285714	0.75	NA	NA	0.179565	0.289062	NA	NA	2	2	0	0	14	8	NA	NA	1.21307	0.362581	0.516054	0.121903	0.288868
NM_172297	Ccdc9	chr7	0	0	0	0.428571	0.777778	NA	0.333333	1	0.179688	NA	1	1	1	0	1	7	9	NA	3	0.749244	0.656469	1.74681	0.71651	0.318353
NM_001081059	Ccdc90a	chr13	4	0	2	0.740741	0.658537	0.692308	0.7	0.0191573	0.0595839	0.266846	0.34375	3	3	3	2	27	42	13	10	9.19548	10.5458	27.9631	19.7948	17.5709
NM_144819	Ccdc92	chr5	3	0	0	0.423077	0.62963	0.508475	0.391304	0.557197	0.247789	1	0.404873	6	5	6	5	26	29	59	24	22.5655	2.5288	3.74173	7.54241	3.07191
NM_001025156	Ccdc93	chr1	0	0	0	0.392857	0.3125	0.714286	0.666667	0.344928	0.210114	0.179565	1	2	2	1	1	28	18	15	3	0.0681162	0.358091	0.343469	0.25649	0.111635
NM_028381	Ccdc94	chr17	4	0	1	0.313725	0.4	0.29	0.354839	0.000213391	0.136032	3.216e-05	0.0300159	3	3	3	3	102	65	101	62	9.14501	18.0683	16.5319	20.654	14.0523
NM_025725	Ccdc96	chr5	0	0	0	1	0.333333	NA	NA	0.125	1	NA	NA	1	1	0	0	4	3	NA	NA	0.738197	1.16626	2.42258	0.173092	0.401799
NM_028771	Ccdc97	chr7	4	0	1	0.461538	0.47093	0.585859	0.740741	0.430021	0.492672	0.107352	0.000535436	8	8	9	8	131	175	99	54	16.3673	14.6414	22.212	20.0337	9.82618
NM_146248	Cchcr1	chr17	4	0	1	0.516129	0.52381	0.289157	0.617021	0.787747	0.877614	0.000154559	0.143865	9	9	9	9	126	42	84	47	3.29114	9.8992	5.41199	10.6988	5.82193
NM_009139	Ccl6	chr11	0	0	0	0	NA	NA	NA	0.25	NA	NA	NA	1	0	0	0	3	NA	NA	NA	1.43748	0.354014	NA	NA	NA
NM_011338	Ccl9	chr11	0	0	0	0	NA	NA	NA	0.25	NA	NA	NA	1	0	0	0	3	NA	NA	NA	2.48401	0.619682	0.24054	0.206238	0.269291
NM_146014	Ccm2	chr11	4	0	0	0.338149	0.525424	0.521053	0.487179	3.51331e-53	0.188344	0.441647	0.534376	12	12	12	12	2241	719	387	673	36.6955	152.721	58.3293	39.135	64.6472
NM_007628	Ccna1	chr3	0	0	0	NA	0.2	NA	0.5	NA	0.109375	NA	1	0	2	0	1	NA	10	NA	4	1.63377	NA	2.15616	0.113184	1.14946
NM_007630	Ccnb2	chr9	3	0	1	0.458564	0.5	1	0.166667	0.298039	1	0.125	0.0385742	1	1	1	1	184	35	4	12	0.490534	112.2	40.7969	10.6394	9.28649
NM_016746	Ccnc	chr4	2	0	0	0.762712	0.61745	0.669811	0.692308	1.39152e-12	0.00517212	0.000606076	0.000312839	16	12	16	14	180	149	107	91	4.65967	2.61751	3.55935	4.00217	2.33774
NM_009829	Ccnd2	chr6	4	0	0	0.451836	0.481462	0.365189	0.46394	2.65749e-13	0.0222152	5.97311e-60	2.96257e-10	22	22	22	22	5812	3899	3678	7710	18.1767	168.094	158.029	150.895	534.326
NM_009831	Ccng1	chr11	4	0	0	0.394197	0.573198	0.533868	0.538922	1.25061e-37	7.43777e-10	0.00142915	8.88733e-07	19	18	18	19	3684	1797	2259	4033	42.8058	170.945	100.36	150.789	339.957
NM_007635	Ccng2	chr5	4	0	0	0.587302	0.394231	0.415254	0.47619	0.00663799	0.0389579	0.0798343	0.620842	9	8	9	9	254	107	118	148	18.9666	16.9183	10.5408	15.3865	16.7447
NM_023243	Ccnh	chr13	4	0	0	0.646617	0.544	0.557325	0.630872	1.30507e-11	0.054369	0.0480766	7.30342e-06	12	11	11	12	534	500	321	300	34.8118	18.6949	25.9978	17.8951	15.9874
NM_017367	Ccni	chr5	4	0	0	0.594787	0.496774	0.410367	0.564732	0.000115132	0.926117	0.000133319	0.00701468	8	8	8	8	426	471	470	453	94.2403	56.8677	74.5162	89.129	98.7979
NM_172839	Ccnj	chr19	4	0	0	0.455446	0.420168	0.339286	0.486842	0.231569	0.0985236	0.000860568	0.908777	14	12	16	12	205	120	112	76	4.57774	6.14127	7.47702	5.17763	4.00852
NM_001045530	Ccnjl	chr11	1	0	0	0.363636	NA	NA	NA	0.548828	NA	NA	NA	1	0	0	0	11	NA	NA	NA	0.65285	9.02659	3.21936	1.82421	3.46943
NM_009832	Ccnk	chr12	4	0	0	0.4	0.605263	0.608696	0.555556	0.232693	0.0846461	0.183925	0.617719	4	5	5	4	45	76	46	36	7.15794	6.09488	22.878	8.78826	5.30033
NM_019937	Ccnl1	chr3	4	0	0	0.48855	0.544944	0.561404	0.675325	0.757465	0.100248	0.125909	1.61404e-05	7	8	7	8	263	356	174	156	26.8914	27.887	41.6399	27.7232	22.1965
NM_207678	Ccnl2	chr4	4	0	0	0.676471	0.45	0.52381	0.4375	0.0576127	0.823803	1	0.803619	1	1	1	1	34	20	21	16	36.4789	54.1487	36.9377	38.1784	39.4362
NM_009833	Ccnt1	chr15	4	0	0	0.575472	0.541667	0.65	0.517241	0.144782	0.665466	0.0806905	1	3	3	3	3	107	48	40	29	18.0189	29.0345	30.6051	23.5106	23.4215
NM_028399	Ccnt2	chr1	4	0	1	0.28877	0.415094	0.671642	0.375	1.66701e-16	0.0160241	8.74546e-05	0.00592521	9	9	8	8	377	215	138	130	25.7393	29.5605	23.084	18.9151	15.342
NM_026484	Ccny	chr18	4	0	0	0.602484	0.427586	0.546713	0.550943	0.000279233	0.096394	0.0274022	0.110055	11	11	12	11	322	148	586	266	46.538	33.0585	23.6358	84.1227	44.2509
NM_001097644	Ccnyl1	chr1	4	0	0	0.37	0.609428	0.61039	0.487179	1.9783e-10	0.000193609	0.0675493	0.909946	5	5	5	5	607	300	78	78	15.4463	75.5643	48.5386	15.9976	17.139
NM_001114328	Ccpg1	chr9	3	0	0	0.666667	0.555556	0.391304	0.35	0.301758	0.814529	0.404873	0.263176	2	2	2	2	15	18	24	22	7.51836	1.82824	3.30683	4.00389	3.48967
NM_145700	Ccrl1	chr9	1	0	0	0.318182	NA	0	0.142857	0.133801	NA	0.0625	0.125	1	0	1	1	23	NA	5	7	1.41991	18.5069	3.77382	2.9415	6.91346
NM_009834	Ccrn4l	chr3	3	1	0	0.382979	0.391566	0.944444	0.509434	0.143865	0.00642306	0.000144958	1	5	10	3	10	49	166	18	53	9.78593	2.53989	16.0578	3.95614	5.24944
NM_016892	Ccs	chr19	4	0	0	0.411111	0.454545	0.544554	0.442424	0.00414727	0.200092	0.231569	0.160922	4	4	4	4	273	224	204	165	18.1813	36.8194	42.0603	40.0775	39.5094
NM_007636	Cct2	chr10	4	0	0	0.507342	0.602787	0.589724	0.503785	0.467043	3.40544e-12	9.84652e-11	0.816545	9	9	9	9	2619	1160	1330	1202	116.131	403.081	251.056	241.027	242.944
NM_009836	Cct3	chr3	4	0	0	0.552711	0.553106	0.530612	0.546269	0.0073666	0.0198292	0.371127	0.101054	2	2	2	2	670	502	248	338	86.8048	340.179	250.096	238.925	217.35
NM_009837	Cct4	chr11	4	0	0	0.325626	0.474908	0.477064	0.487047	1.01941e-29	0.161645	0.303924	0.560725	5	5	5	5	1049	827	552	585	68.144	249.671	138.788	119.998	129.831
NM_007637	Cct5	chr15	4	0	0	0.547586	0.533753	0.50624	0.561471	0.000317882	0.0263668	0.67528	8.67735e-05	4	4	4	4	1460	1126	1298	1048	146.469	421.801	280.401	332.55	297.636
NM_009838	Cct6a	chr5	4	0	0	0.633498	0.617331	0.63993	0.65069	1.37677e-49	8.91119e-21	3.32104e-31	2.51159e-29	23	23	23	23	3064	1601	1731	1391	80.6247	130.377	96.7935	117.445	89.8716
NM_007638	Cct7	chr6	4	0	0	0.538986	0.505353	0.550696	0.545455	0.0136112	0.853177	0.0256904	0.0478583	3	3	3	3	1034	472	512	500	99.6352	229.579	137.738	167.777	160.442
NM_009840	Cct8	chr16	4	0	0	0.535345	0.587601	0.561661	0.504286	0.0173579	2.06189e-06	0.000468252	0.850124	13	13	13	13	1169	756	838	706	119.407	216.159	138.394	178.025	187.008
NM_153098	Cd109	chr9	4	0	2	0.181818	0.454545	0.428571	0.181818	0.0654297	1	0.790527	0.00434351	1	1	1	1	11	11	14	22	0.451022	7.07747	8.03116	14.3375	30.4562
NM_009842	Cd151	chr7	3	0	0	0.555556	0.333333	0.4	0.555556	0.617719	0.507812	0.361595	0.701108	1	1	1	1	36	9	30	28	0.671869	3.9753	2.40675	5.63205	5.62519
NM_016898	Cd164	chr10	4	0	0	0.416667	0.472973	0.560209	0.523077	0.194505	0.727547	0.111176	0.804317	2	2	2	2	73	74	196	66	31.2618	72.133	107.864	102.058	82.4657
NM_007639	Cd1d1	chr3	4	0	0	0.574468	0.601124	0.678571	0.637931	0.0917692	0.00852135	0.0871586	0.0479403	5	5	3	5	144	180	30	58	0.772982	10.5124	19.0188	4.56821	7.32526
NM_130903	Cd209c	chr8	4	4	0	0.0285714	0.0652174	0.0540541	0.0714286	4.21145e-18	4.62194e-10	1.02445e-08	0.00183105	5	4	4	2	70	46	37	14	48.8061	9.11047	9.18045	8.40492	6.38731
NM_031162	Cd247	chr1	0	0	0	0.166667	0.444444	0.4	NA	0.21875	1	1	NA	1	1	1	0	6	9	5	NA	2.19505	1.79782	2.02323	2.55833	1.53225
NM_009846	Cd24a	chr10	4	3	1	0.908537	0.854701	0.881356	0.714286	1.16792e-56	1.72626e-15	1.35899e-09	0.000898047	6	6	6	6	333	117	60	65	14.7609	35.2409	18.2834	8.58904	12.2912
NM_021893	Cd274	chr19	0	0	0	1	NA	NA	NA	0.25	NA	NA	NA	1	0	0	0	3	NA	NA	NA	1.14343	0.466047	0.287437	0.31686	0.396053
NM_133983	Cd276	chr9	4	0	0	0.497842	0.478329	0.547807	0.508661	0.893321	0.0297123	0.00481574	0.555694	25	25	25	25	1396	2590	904	1280	3.49613	27.7725	77.6677	31.999	40.0704
NM_009847	Cd2ap	chr17	4	0	0	0.589744	0.60274	0.376866	0.632479	0.0146884	0.0160989	6.63148e-05	0.00531928	11	13	13	12	199	148	273	117	9.06833	9.59375	7.38569	21.4049	8.15178
NM_027353	Cd2bp2	chr7	4	0	0	0.514683	0.552311	0.534031	0.5	0.479189	0.0381635	0.200796	1	15	15	15	15	656	416	385	384	28.268	29.7217	24.5294	28.4167	28.8591
NM_025422	Cd302	chr2	3	0	1	0.552941	0.255319	0.641026	NA	0.385669	0.00108854	0.108129	NA	1	2	2	0	87	50	42	NA	11.7266	66.0114	30.1237	25.6634	0.429609
NM_019421	Cd320	chr17	4	0	0	0.506757	0.503759	0.39604	0.508929	0.934525	1	0.0460441	0.924775	5	5	5	5	148	136	103	113	9.0419	10.7395	11.7552	12.8381	13.1602
NM_007646	Cd38	chr5	0	0	0	0	NA	0.25	NA	0.25	NA	0.625	NA	1	0	1	0	3	NA	4	NA	7.1058	0.69781	1.02002	1.00607	0.721226
NM_145822	Cd3eap	chr7	4	0	0	0.556196	0.429379	0.5	0.563025	0.041201	0.0709382	1	0.199158	11	11	11	11	352	179	164	119	14.0445	22.9816	15.5127	15.9554	12.3935
NM_010778	Cd46	chr1	0	0	0	NA	NA	1	NA	NA	NA	0.125	NA	0	0	1	0	NA	NA	4	NA	3.04398	0.838193	0.596492	1.97265	0.296795
NM_010581	Cd47	chr16	4	0	0	0.628049	0.6	0.586207	0.4875	0.00129558	0.0929119	0.132902	0.911072	7	7	6	6	165	81	89	81	63.4637	17.7069	11.4668	11.4368	11.6618
NM_007652	Cd59a	chr2	0	0	0	0	0.333333	0	NA	0.03125	0.387695	0.03125	NA	2	2	2	0	6	12	6	NA	0.46504	0.133851	0.476267	0.26251	NA
NM_009853	Cd68	chr11	2	0	1	0.2	0.583333	0.363636	0.265306	0.375	0.774414	0.548828	0.00140269	1	3	3	3	5	12	11	49	5.73973	1.45695	6.06144	2.81344	14.3755
NM_133655	Cd81	chr7	4	0	4	0.715789	0.705234	0.765517	0.754121	1.85534e-21	4.81752e-29	1.7448e-48	1.59486e-44	2	2	2	2	476	730	730	730	309.754	682.842	1548.88	1229.69	1528.51
NM_009856	Cd83	chr13	0	0	0	NA	0	NA	NA	NA	0.125	NA	NA	0	1	0	0	NA	4	NA	NA	22.92	NA	0.374796	NA	NA
NM_013489	Cd84	chr1	0	0	0	NA	NA	NA	0	NA	NA	NA	0.125	0	0	0	1	NA	NA	NA	4	8.21169	0.495792	0.478835	0.833448	0.62071
NM_007657	Cd9	chr6	4	0	1	0.628272	0.512987	0.671982	0.715365	6.06448e-07	0.809073	4.8136e-13	4.32029e-18	2	2	2	2	385	156	449	401	50.0739	193.195	112.362	756.718	321.504
NM_010740	Cd93	chr2	1	1	0	0	0.0869565	NA	0.916667	0.25	4.14425e-17	NA	0.00634766	1	7	0	4	3	93	NA	12	3.22359	0.697765	13.8673	NA	2.3999
NM_138309	Cd99l2	chrX	4	4	0	0.00766284	0	1	0.00346021	1.84555e-74	5.79563e-70	1.41495e-73	5.83122e-85	8	8	8	8	264	236	247	292	55.3599	27.0079	31.508	39.8898	48.1897
NM_001168536	Cdadc1	chr14	0	0	0	0.214286	0.333333	0.692308	NA	0.00371917	0.507812	0.0755187	NA	3	3	3	0	28	9	26	NA	1.81424	0.414677	0.379415	0.604144	0.235981
NM_027986	Cdadc1	chr14	0	0	0	NA	0	0.333333	NA	NA	0.015625	0.507812	NA	0	1	1	0	NA	7	9	NA	3.54682	0.679026	2.64877	1.53887	1.20218
NM_133837	Cdc123	chr2	4	0	0	0.462121	0.555944	0.475806	0.508287	0.0895528	0.0666047	0.48494	0.881876	5	5	5	5	536	289	252	182	60.7267	73.1206	53.794	53.3487	46.1383
NM_027276	Cdc16	chr8	4	0	0	0.506351	0.546926	0.55611	0.540441	0.683744	0.0217792	0.0278772	0.0651411	7	7	7	7	1191	624	409	546	40.2156	137.984	83.9252	71.2244	108.036
NM_178347	Cdc23	chr18	4	0	0	0.468803	0.5	0.492366	0.517045	0.13925	1	0.853007	0.706371	12	10	10	11	600	194	263	178	15.1416	37.3014	19.8943	22.3381	23.3607
NM_007658	Cdc25a	chr9	4	0	0	0.527273	0.6	0.5	0.416667	0.787706	0.503445	1	0.541256	5	4	4	4	55	20	16	25	2.45286	7.91131	5.27536	3.29863	3.67258
NM_001111075	Cdc25b	chr2	0	0	0	0.459459	0.5	0.333333	0.6	0.742829	1	0.6875	1	1	1	1	1	38	4	6	5	0.164148	1.80091	0.854401	0.294332	0.448371
NM_145436	Cdc27	chr11	4	0	0	0.450368	0.583333	0.526055	0.653061	0.0229774	0.00966345	0.31912	1.69438e-07	15	15	16	16	547	254	408	296	23.2267	27.5288	15.1799	27.3938	23.6145
NM_177613	Cdc34	chr10	4	0	0	0.524917	0.528662	0.522523	0.506329	0.419743	0.523301	0.704379	0.89667	2	2	2	2	303	158	111	240	27.7646	77.1871	52.7068	39.6215	83.6758
NM_016742	Cdc37	chr9	4	0	0	0.575703	0.569118	0.605759	0.587646	5.51677e-07	0.000354883	2.21101e-10	2.04867e-05	6	6	6	6	1112	689	910	606	58.2537	89.4191	58.9533	91.5822	77.3967
NM_025950	Cdc37l1	chr19	4	0	0	0.60241	0.578947	0.546448	0.5	0.0102127	0.0824913	0.0843988	1	7	7	7	7	168	136	373	166	42.0106	14.34	14.3093	45.3151	23.7076
NM_027879	Cdc40	chr10	4	0	0	0.688889	0.46875	0.5	0.626506	1.34698e-05	0.707981	1	0.0275342	3	3	3	4	136	66	119	83	21.104	16.1039	14.1284	27.6789	18.2241
NM_009861	Cdc42	chr4	0	0	0	0.571429	NA	0	0.166667	1	NA	0.25	0.21875	1	0	1	1	7	NA	3	7	156.997	207.227	208.229	216.366	365.264
NM_001033285	Cdc42bpa	chr1	4	0	1	0.270408	0.445736	0.556777	0.427457	5.36149e-39	0.0153866	0.00897813	0.000273072	20	20	20	20	791	523	559	653	73.3054	31.0615	26.7763	30.6844	33.0649
NM_183016	Cdc42bpb	chr12	4	0	0	0.573913	0.550938	0.57193	0.589286	0.000450118	0.00599676	0.000678883	0.00125415	20	20	20	20	584	769	587	341	34.2676	20.4849	35.3197	29.0265	21.1039
NM_027219	Cdc42ep1	chr15	4	0	0	0.601227	0.518931	0.654676	0.573248	0.011961	0.450233	0.000332943	0.0787918	6	6	6	6	165	455	143	158	6.81662	22.4206	83.2718	24.9624	35.2648
NM_026772	Cdc42ep2	chr19	3	0	0	0.309091	0.416667	NA	0.315789	0.0064558	0.774414	NA	0.167068	7	1	0	3	55	12	NA	19	14.202	6.18851	3.42221	0.865825	5.0874
NM_001163346	Cdc42ep4	chr11	0	0	0	0.190476	0.0714286	0.5	0.333333	0.00719738	0.00183105	1	0.6875	1	1	1	1	21	14	10	6	0.888799	0.940136	0.655384	0.481649	0.214002
NM_021454	Cdc42ep5	chr7	1	0	0	NA	NA	0.310345	NA	NA	NA	0.0614283	NA	0	0	2	0	NA	NA	29	NA	1.9517	NA	0.930484	12.5139	0.20834
NM_172395	Cdc42se1	chr3	4	0	0	0.532578	0.601974	0.645	0.518519	0.241581	0.000448901	4.97297e-05	0.583964	3	3	3	3	356	305	200	272	21.6496	84.881	85.1469	72.6152	91.7659
NM_178626	Cdc42se2	chr11	4	0	0	0.38785	0.567839	0.584985	0.555471	4.5844e-59	6.83131e-21	3.9883e-21	1.44482e-08	37	35	35	37	5238	4823	3124	2640	77.0756	109.316	150.079	103.705	89.0565
NM_152810	Cdc5l	chr17	4	0	0	0.578279	0.522667	0.361842	0.441341	3.48813e-05	0.408703	2.35659e-14	0.0300987	14	14	14	14	720	383	770	362	34.5462	39.6962	33.7057	64.3564	33.4314
NM_009863	Cdc7	chr5	4	0	0	0.628615	0.467391	0.439024	0.556818	4.39715e-11	0.602412	0.320293	0.337399	10	10	10	9	667	92	82	88	8.71226	39.7875	8.9085	7.90424	11.1288
NM_145991	Cdc73	chr1	4	0	2	0.3	0.285714	0.529412	0.333333	0.115318	0.179565	1	0.387695	2	2	1	2	20	14	17	12	14.1243	19.1728	15.9106	18.0026	13.645
NM_028023	Cdca4	chr12	4	0	0	0.46875	0.592233	0.441176	0.617647	0.476882	0.0756191	0.607591	0.0681187	4	4	4	4	162	106	35	68	4.07439	21.786	19.6082	9.96509	15.4036
NM_025866	Cdca7	chr2	4	0	1	0.567073	0.527473	0.842105	0.573913	0.0174498	0.675222	0.00442505	0.13535	3	3	1	3	330	92	19	115	2.31505	71.6528	29.9987	11.336	38.2351
NM_146040	Cdca7l	chr12	4	0	0	0.41411	0.48	0.454545	0.518987	0.00226807	0.817554	0.455741	0.822144	4	4	4	4	327	75	89	79	0.757183	25.203	9.79136	15.7153	10.7549
NM_009865	Cdh10	chr15	4	1	0	1	0.69869	0.597122	0.665385	1.81899e-12	1.67793e-09	0.0270735	1.04577e-07	6	13	11	13	41	231	142	261	27.5452	3.00258	23.28	19.0521	32.0099
NM_009866	Cdh11	chr8	3	0	0	NA	0.555556	0.578947	0.561404	NA	0.701108	0.206737	0.427043	0	3	5	4	NA	27	76	58	35.4317	2.4116	9.55344	18.5823	21.1131
NM_019707	Cdh13	chr8	4	0	1	0.315789	0.298969	0.538462	0.555556	0.167068	9.34069e-05	0.620145	0.289798	1	1	1	1	19	98	65	108	44.8673	18.1048	108.725	102.633	196.199
NM_001081386	Cdh19	chr1	2	0	0	NA	0.666667	0.583851	0.595238	NA	0.6875	0.00308103	0.279956	0	2	8	4	NA	7	328	43	2.64652	0.166458	2.52711	40.9165	4.74476
NM_007664	Cdh2	chr18	4	0	0	0.449744	0.448302	0.518946	0.452703	0.0165964	0.00018456	0.371896	0.0237099	14	14	13	15	594	1333	615	600	49.8619	24.4492	74.6835	42.1562	39.771
NM_011800	Cdh20	chr1	4	0	0	0.398936	0.531524	0.665775	0.550287	2.30937e-13	0.0355953	1.37715e-10	0.00886353	21	21	21	19	1329	1157	378	703	9.60007	64.4523	69.7452	23.8107	55.4237
NM_174988	Cdh22	chr2	1	0	1	0.75	0.722222	NA	0.666667	0.0413895	0.000207716	NA	1	4	6	0	1	20	73	NA	3	10.3857	2.72501	9.39348	0.66727	0.727855
NM_199470	Cdh24	chr14	0	0	0	NA	0.6	0.6	0	NA	1	1	0.0625	0	1	1	1	NA	5	5	5	2.73897	1.4701	2.00395	2.79384	1.58363
NM_009867	Cdh4	chr2	4	1	0	0.45666	0.527527	0.00574713	0.487356	0.00119323	0.0584595	1.46167e-50	0.476506	22	22	21	22	1436	1236	176	876	6.12823	43.0828	52.6749	8.3831	45.1647
NM_007666	Cdh6	chr15	3	2	0	0.147059	0.0841121	0.685714	NA	1.22454e-17	4.85567e-20	0.0409596	NA	11	9	7	0	137	107	36	NA	8.10791	8.41265	13.0732	4.78135	0.889088
NM_130878	Cdhr1	chr14	0	0	0	0	0.0952381	0	0.0625	4.76837e-07	0.000221252	0.000976562	0.000518799	2	4	2	3	22	22	12	16	18.7046	0.314972	1.00866	0.288273	0.334584
NM_007661	Cdk11b	chr4	4	0	0	0.507937	0.515789	0.55814	0.506494	0.884383	0.837556	0.331834	1	6	6	6	6	190	96	88	78	17.1926	18.9592	19.0349	18.3477	13.2449
NM_026952	Cdk12	chr11	0	0	0	NA	0	NA	NA	NA	0.0078125	NA	NA	0	2	0	0	NA	8	NA	NA	0.443963	0.034968	0.282025	0.146303	0.148581
NM_011074	Cdk14	chr5	4	0	0	0.565104	0.483936	0.605191	0.529412	0.000347638	0.501517	1.38439e-08	0.0719672	26	26	25	28	774	502	743	975	83.2662	20.0935	25.03	34.6481	43.8927
NM_011049	Cdk16	chrX	4	4	0	0	0	1	0.0109489	1.19851e-94	8.51592e-109	2.03916e-56	2.25913e-76	4	3	4	4	314	363	190	277	121.838	73.7535	110.627	70.3276	97.1926
NM_008795	Cdk18	chr1	1	1	0	NA	NA	0	NA	NA	NA	7.62939e-06	NA	0	0	4	0	NA	NA	19	NA	15.7394	0.018544	0.0527865	3.08407	0.0590959
NM_001168304	Cdk19	chr10	0	0	0	0.5	0.6	0.333333	0.384615	1	0.424356	0.0532519	0.581055	1	2	2	1	18	25	40	13	1.33177	0.807344	1.12139	1.77033	0.805951
NM_013812	Cdk2ap1	chr5	4	0	0	0.512442	0.560886	0.510244	0.53125	0.429933	6.79356e-05	0.532192	0.0489288	3	3	3	3	1095	1095	1037	1031	88.1511	902.448	603.532	530.606	624.189
NM_026373	Cdk2ap2	chr19	4	0	0	0.434343	0.505618	0.539474	0.576923	0.227626	1	0.566573	0.212683	2	2	2	2	101	89	78	79	17.425	53.3848	44.9182	42.1228	48.5088
NM_009870	Cdk4	chr10	4	0	0	0.523119	0.558751	0.565136	0.522843	0.0829105	4.60506e-05	2.33377e-05	0.094965	4	4	4	4	1460	1237	1081	1394	39.6576	493.635	374.614	356.798	413.84
NM_007668	Cdk5	chr5	3	0	0	0.461538	0.533333	0.454545	0.142857	1	1	1	0.125	2	2	2	2	13	15	11	7	61.4529	37.3821	37.1108	43.149	40.3221
NM_009871	Cdk5r1	chr11	1	0	0	0.227273	0.583333	0.6	0.8	0.0169005	0.774414	1	0.375	4	3	2	1	23	12	6	5	77.8953	1.96754	4.93953	2.10089	1.13211
NM_025876	Cdk5rap1	chr2	3	1	0	0.941176	0.666667	0.454545	0.884615	0.000274658	0.15159	1	8.79765e-05	4	4	2	4	17	25	11	26	6.774	2.98194	7.95776	3.28401	6.16772
NM_145990	Cdk5rap2	chr4	4	0	0	0.578876	0.559063	0.519573	0.586902	1.4588e-09	0.000239064	0.375724	0.00062499	22	22	22	22	1488	998	570	401	5.69745	49.3878	45.4125	29.7836	21.6052
NM_030248	Cdk5rap3	chr11	4	0	1	0.398844	0.719136	0.655941	0.554987	7.57685e-11	1.22677e-29	3.63214e-10	0.0335344	14	14	14	14	1044	654	408	392	18.8552	62.992	37.6029	35.4021	33.7451
NM_009874	Cdk7	chr13	4	0	0	0.550781	0.548632	0.613828	0.5875	0.024108	0.0139882	3.28005e-08	0.000544361	44	45	46	41	512	662	600	403	16.479	13.1156	15.3549	18.105	13.8375
NM_153599	Cdk8	chr5	4	0	0	0.477273	0.536585	0.5	0.375	0.663585	0.755229	1	0.0443709	1	1	1	1	132	41	14	76	22.9463	41.8722	31.8342	22.4129	42.9133
NM_130860	Cdk9	chr2	4	0	0	0.496212	0.466667	0.484375	0.451807	0.95094	0.522991	0.900653	0.24425	14	7	6	12	266	120	64	168	41.633	41.4678	25.169	22.4631	28.4164
NM_144536	Cdkal1	chr13	4	0	0	0.577778	0.655405	0.461538	0.550296	0.0231975	0.0001943	0.430021	0.218294	17	16	16	17	227	150	131	171	10.5389	10.8385	8.61588	10.2311	12.5891
NM_001166654	Cdkl3	chr11	0	0	0	NA	0.8	NA	NA	NA	0.375	NA	NA	0	1	0	0	NA	5	NA	NA	0.20706	0.0709907	0.303119	0.0371275	0.150822
NM_001024624	Cdkl5	chrX	0	0	0	NA	NA	1	0	NA	NA	0.0625	0.5	0	0	2	1	NA	NA	6	3	58.6129	2.97564	3.59122	6.11572	6.4882
NM_007669	Cdkn1a	chr17	2	0	2	0.428571	0.818182	0.289474	NA	1	0.0654297	0.013853	NA	1	1	1	0	7	11	40	NA	0.51754	16.7385	22.182	33.0365	32.7498
NM_172407	Cdkn2aip	chr8	4	0	0	0.482759	0.524272	0.432099	0.489796	0.739882	0.693686	0.266412	0.919607	7	9	7	7	148	105	81	99	8.29604	9.23093	8.67443	9.4102	10.7159
NM_029976	Cdkn2aipnl	chr11	4	0	0	0.418987	0.56535	0.5623	0.593516	1.28499e-10	0.0204435	0.0315582	0.000211204	11	11	11	11	1593	333	317	404	29.4796	95.0718	25.7761	31.3656	38.6694
NM_007670	Cdkn2b	chr4	4	3	1	0	0.291667	0	1	6.10352e-05	0.0639147	2.38419e-07	8.47033e-22	1	1	1	1	15	24	23	71	0.605265	5.39303	15.5824	14.5691	37.7974
NM_009878	Cdkn2d	chr9	4	0	0	0.574766	0.592593	0.5	0.481481	0.0338364	0.442068	1	0.824313	4	4	3	4	216	27	42	81	32.393	57.3744	10.4449	22.8188	40.2533
NM_177647	Cdnf	chr2	1	1	0	0.103448	0.117647	0.0732984	0.184211	7.46709e-15	6.16489e-06	4.1853e-37	2.32365e-08	19	8	32	14	87	34	192	76	8.49146	1.79972	1.54757	5.08856	2.27024
NM_033037	Cdo1	chr18	4	0	1	0.333333	0.190476	0.458333	0.434783	0.15159	0.00719738	0.83882	0.677639	5	3	3	5	24	21	26	23	27.2874	7.34673	16.6568	15.4077	12.9416
NM_021339	Cdon	chr9	0	0	0	0.375	0.797753	0.844828	NA	0.726562	1.29687e-08	8.9594e-08	NA	3	18	13	0	9	89	60	NA	3.40549	0.892609	1.67162	2.67811	0.374285
NM_001166658	Cdr1	chrX	2	2	0	0	0	0.965517	0	0.125	0.25	1.11759e-07	9.53674e-07	1	1	3	3	4	3	29	21	171.877	1.56292	2.3635	8.85084	4.90289
NM_007672	Cdr2	chr7	4	1	1	0.636364	0.753165	0.664706	0.893333	4.88922e-09	1.31196e-10	2.09591e-05	2.17552e-24	12	12	11	12	463	158	171	150	7.46126	26.8219	11.7486	14.0393	10.9073
NM_001080929	Cdr2l	chr11	4	0	0	0.334985	0.498498	0.549669	0.527778	5.12742e-26	1	0.0950014	0.316639	12	12	10	12	1030	341	307	364	12.5174	71.1863	30.3758	35.7847	38.7743
NM_138651	Cds2	chr2	4	0	0	0.433588	0.47619	0.495918	0.470024	1.69721e-06	0.122711	0.823077	0.0363786	35	34	35	35	1328	1105	1005	1270	124.576	27.8262	34.3407	34.0875	43.5881
NM_001134427	Cdv3	chr9	0	0	0	0.583333	0	0.454545	0.6	0.774414	0.0625	1	1	2	1	2	1	12	5	12	6	0.144456	0.472677	0.189211	0.579389	0.400118
NM_029441	Cdyl2	chr8	0	0	0	0.75	NA	NA	NA	0.625	NA	NA	NA	1	0	0	0	4	NA	NA	NA	2.77351	1.82738	1.16706	0.0367579	1.15723
NM_007678	Cebpa	chr7	2	0	0	0.678571	0.842105	0.4375	0.512195	0.00140449	0.00442505	0.803619	1	7	3	4	7	84	19	17	41	2.29065	4.85685	2.19256	1.47706	4.7388
NM_009884	Cebpg	chr7	4	0	0	0.494135	0.523179	0.549107	0.558952	0.788689	0.625504	0.16043	0.0855504	22	13	16	18	684	152	228	230	12.6818	20.386	6.58265	8.78317	10.7958
NM_001128151	Cecr2	chr6	1	0	0	0.583333	0.648649	NA	0.5	0.541256	0.0988717	NA	1	4	6	0	1	24	37	NA	4	1.30647	1.72281	4.49396	0.567543	1.55329
NM_144815	Cecr5	chr6	4	0	0	0.652542	0.587413	0.614679	0.581967	1.00196e-08	0.0443729	0.0210864	0.0849806	8	8	8	8	357	145	111	124	11.4892	31.1437	19.8456	15.0957	19.7176
NM_033567	Cecr6	chr6	0	0	0	0.5	0.384615	NA	1	1	0.581055	NA	0.125	1	3	0	1	4	13	NA	4	10.4734	0.452436	1.6016	0.254822	0.90576
NM_033612	Cela1	chr15	3	0	0	0.681818	NA	0.576923	0.565217	0.133801	NA	0.557197	0.677639	3	0	3	3	23	NA	27	23	1.94525	3.06428	0.145378	10.497	6.26603
NM_176954	Celf5	chr10	3	0	0	0.666667	0.521277	0.666667	0.591837	0.237885	0.757189	0.00433488	0.0854106	5	12	16	18	18	95	80	99	55.3657	1.36387	3.47946	4.25957	4.77693
NM_009886	Celsr1	chr15	1	0	0	NA	0.535714	NA	NA	NA	0.850554	NA	NA	0	4	0	0	NA	28	NA	NA	0.813008	0.199359	6.07501	0.0240606	0.415399
NM_021316	Cend1	chr7	1	1	0	NA	NA	NA	1	NA	NA	NA	1.49012e-08	0	0	0	4	NA	NA	NA	29	156.036	NA	0.582212	0.962716	5.43168
NM_007681	Cenpa	chr5	4	0	0	0.531532	0.5	0.692308	0.525	0.382978	1	0.0755187	0.874629	1	1	1	1	224	55	26	40	0.956797	102.408	27.2389	13.0582	29.8888
NM_007682	Cenpb	chr2	4	0	0	0.576208	0.61747	0.624679	0.614213	0.000468298	2.19411e-05	1.00024e-06	6.72488e-06	5	5	5	5	541	333	400	399	40.7393	62.2288	52.3268	63.149	80.5864
NM_007683	Cenpc1	chr5	4	0	0	0.496063	0.578571	0.587302	0.569444	0.949986	0.0755508	0.0609383	0.288784	12	11	12	12	257	142	128	75	12.1087	11.8599	11.9167	10.7203	6.68465
NM_173762	Cenpe	chr3	4	0	0	0.588235	0.619718	0.527273	0.597701	0.00134104	0.0568147	0.787706	0.085689	7	7	7	7	342	73	56	88	0.907968	28.0075	8.83889	9.17654	10.2755
NM_001081363	Cenpf	chr1	4	0	3	0.290323	0.294118	0.631579	0.294118	3.39192e-06	0.0243065	0.359283	0.143463	1	1	1	1	125	34	19	17	1.01948	62.6555	14.7531	11.9206	13.7651
NM_145924	Cenpi	chrX	4	4	0	0	0	1	0	8.88178e-16	1.19209e-07	0.00195312	6.10352e-05	1	1	1	1	51	24	10	15	0.369423	35.2044	8.70848	7.74187	13.7806
NM_001014996	Cenpj	chr14	0	0	0	0.857143	0.5	0.428571	NA	0.125	1	1	NA	1	1	1	0	7	4	7	NA	0.806304	9.39905	4.16434	3.51406	4.57957
NM_021790	Cenpk	chr13	0	0	0	NA	NA	0	NA	NA	NA	0.0625	NA	0	0	1	0	NA	NA	5	NA	0.382233	1.85653	1.05694	1.23796	0.961413
NM_134046	Cenpo	chr12	4	0	1	0.58209	0.613636	0.666667	0.710526	0.0692596	0.174171	0.0198343	0.013853	7	6	7	5	134	44	55	39	2.50369	6.85414	4.07245	4.91785	4.55921
NM_031863	Cenpq	chr17	4	0	1	0.424242	0.2	0.333333	0.413793	0.267812	0.00407732	0.122078	0.458258	1	1	1	1	67	25	27	29	2.66138	33.7264	13.2131	23.3543	18.4125
NM_012018	Cep110	chr2	4	0	0	0.517857	0.608108	0.534483	0.547619	0.422059	0.00154974	0.404403	0.445205	25	23	22	13	567	224	178	85	3.09375	11.6131	7.07618	5.70486	3.2752
NM_178686	Cep120	chr18	4	0	0	0.609225	0.619512	0.606061	0.582599	1.31779e-13	1.492e-06	5.58128e-09	7.21498e-07	37	34	37	37	1160	415	766	913	24.5281	22.7726	11.8102	24.2868	29.7836
NM_199032	Cep135	chr5	4	0	0	0.477654	0.536	0.561644	0.534091	0.42795	0.474422	0.349182	0.594288	19	17	11	13	360	125	73	89	3.27721	11.8518	5.79428	4.75304	4.87784
NM_001081091	Cep152	chr2	3	0	1	0.397849	0.947368	0.807692	0.384615	0.0613859	7.62939e-05	0.00249392	0.581055	8	5	4	3	93	19	26	13	1.38614	7.58943	2.67608	3.27267	3.16758
NM_001081373	Cep164	chr9	4	0	0	0.63961	0.613208	0.551282	0.568966	1.09585e-06	0.0250213	0.229658	0.358143	22	17	19	12	309	107	158	58	3.02497	9.37641	5.30294	6.7178	3.47679
NM_001099637	Cep170	chr1	4	0	0	0.307269	0.437276	0.562874	0.486807	4.74215e-56	0.000319373	0.000314099	0.490149	25	25	24	25	1651	846	848	764	33.3025	55.7513	38.5612	43.8641	40.4819
NM_027556	Cep192	chr18	4	0	0	0.465974	0.53629	0.503846	0.481884	0.0290022	0.280338	0.950565	0.58808	29	27	27	26	1062	255	262	279	3.65441	28.1622	10.3734	11.5229	12.0916
NM_001039184	Cep350	chr1	4	0	1	0.271957	0.410208	0.599349	0.388664	1.10966e-62	4.18207e-05	9.65612e-07	8.49859e-07	38	37	38	37	1305	535	622	498	12.5887	20.2165	12.2539	16.0728	13.0692
NM_026665	Cep57	chr9	4	0	0	0.529412	0.565217	0.60274	0.473684	0.464707	0.335558	0.100644	0.731009	4	4	5	4	190	70	74	77	12.7508	26.3896	15.1837	15.0818	17.6785
NM_001081122	Cep63	chr9	4	0	0	0.583673	0.638298	0.4	0.513889	0.0104564	0.00954781	0.0568879	0.906294	6	6	6	6	248	94	100	72	12.9516	15.7764	12.5839	11.7682	7.27769
NM_172260	Cep68	chr11	4	0	1	0.427769	0.602294	0.749499	0.660848	3.78529e-07	3.3127e-06	7.2647e-30	1.14075e-10	35	32	35	34	1249	526	503	403	9.19354	22.5118	15.0258	14.7398	12.9297
NM_023873	Cep70	chr9	4	0	0	0.564246	0.378378	0.45614	0.584906	0.099833	0.047393	0.596642	0.271679	13	10	10	9	180	77	58	53	13.0882	7.66565	4.58235	3.5738	3.80393
NM_001081073	Cep76	chr18	4	0	0	0.555133	0.588889	0.666667	0.527132	0.0840528	0.113344	0.00118523	0.597485	11	10	10	10	268	91	101	130	3.1346	13.1027	5.3744	7.03819	10.0883
NM_198019	Cep78	chr19	4	0	0	0.547009	0.368421	0.521739	0.515337	0.0254899	0.000719329	0.605943	0.75416	20	20	19	18	590	172	188	164	9.06768	16.1765	9.24103	8.30952	6.99121
NM_028815	Cep97	chr16	1	0	0	0.488372	0.5	0.608696	0.5	0.914212	1	0.404873	1	14	4	6	7	87	12	23	26	4.13077	3.06579	1.17987	2.28734	1.85608
NM_133869	Cept1	chr3	4	0	0	0.506667	0.507246	0.623188	0.511364	1	1	0.0532894	0.915187	6	5	6	6	75	69	70	90	31.5479	7.41454	11.9735	13.1673	12.5284
NM_207298	Cercam	chr2	2	1	0	NA	0.333333	0.0833333	NA	NA	0.387695	0.00634766	NA	0	3	2	0	NA	12	12	NA	4.12277	0.249657	3.02032	3.101	0.795607
NM_145475	Cerk	chr15	4	0	0	0.387239	0.511592	0.591011	0.493373	1.08652e-11	0.582081	0.000143544	0.75886	28	26	27	28	914	652	455	683	40.2705	21.505	18.5769	16.6559	23.3128
NM_007684	Cetn3	chr13	1	0	1	0.5	0.75	1	1	1	0.145996	0.125	0.25	1	1	1	1	6	12	4	3	65.7241	80.406	54.2043	56.9534	83.8725
NM_007687	Cfl1	chr19	4	0	0	0.545916	0.542081	0.531056	0.541845	4.96903e-05	0.000252081	0.00676729	0.000328111	6	6	6	6	1987	1937	1959	1880	739.658	1579.05	1813.61	1186.31	1591.85
NM_007688	Cfl2	chr12	4	0	1	0.245989	0.469466	0.449324	0.458647	2.05749e-12	0.354103	0.0917061	0.385959	10	8	9	10	188	264	302	134	21.7805	10.6318	20.4131	23.1663	14.6431
NM_009805	Cflar	chr1	0	0	0	0.333333	1	NA	NA	1	0.00390625	NA	NA	1	2	0	0	3	9	NA	NA	0.547471	1.23158	1.23499	0.526997	0.535201
NM_207653	Cflar	chr1	4	0	0	0.376147	0.52069	0.539305	0.488281	8.10911e-15	0.518387	0.072431	0.626914	35	34	33	34	989	292	554	518	7.55552	18.2099	10.0623	15.7345	14.3385
NM_008823	Cfp	chrX	0	0	0	0	NA	1	NA	0.00390625	NA	0.25	NA	1	0	1	0	9	NA	3	NA	4.23513	3.40985	2.26833	2.44238	1.59454
NM_178647	Cggbp1	chr16	4	0	0	0.597668	0.60903	0.576842	0.562715	5.93542e-16	2.03571e-12	2.43838e-06	2.08819e-05	22	22	22	22	1732	1046	965	1172	22.4445	37.6697	32.6972	35.3262	43.8973
NM_001037711	Cgn	chr3	0	0	0	NA	0.666667	NA	NA	NA	1	NA	NA	0	1	0	0	NA	3	NA	NA	1.03875	0.50453	0.175532	0.387001	0.232243
NM_026599	Cgnl1	chr9	0	0	0	0.9	0.2	0.642857	0.166667	8.43033e-06	0.00407732	0.42395	0.0385742	8	7	4	4	30	26	14	12	4.19273	0.827955	1.35696	0.905391	0.746249
NM_001164320	Chadl	chr15	1	0	0	NA	0.333333	0.622642	NA	NA	1	0.0983706	NA	0	1	2	0	NA	3	54	NA	1.75996	1.08796	1.80128	29.5759	1.87506
NM_013733	Chaf1a	chr17	3	0	0	0.351351	0.606061	0.5	0.75	0.0988717	0.296206	1	0.625	2	2	2	1	37	33	20	4	2.50483	16.2556	16.9877	16.1547	6.50264
NM_025366	Chchd1	chr14	4	0	1	0.386364	0.288889	0.533333	0.525641	0.0422106	0.00660882	0.855536	0.734342	1	1	1	1	91	47	30	78	57.0575	180.425	82.5851	77.3001	158.08
NM_024166	Chchd2	chr5	4	0	0	0.531585	0.566474	0.570842	0.518966	0.0725524	0.000103863	0.00202948	0.383237	3	3	3	3	846	873	491	585	157.796	151.702	195.861	126.215	163.093
NM_025336	Chchd3	chr6	4	0	0	0.511733	0.531579	0.575835	0.511241	0.452636	0.23801	0.00322357	0.491575	6	6	6	6	1114	383	392	1034	50.3712	153.756	99.594	87.0142	201.187
NM_133928	Chchd4	chr6	4	0	0	0.488722	0.574194	0.445783	0.447853	0.587234	0.076876	0.186854	0.06743	9	9	8	10	672	156	169	327	40.703	48.5453	17.8222	20.3585	39.0375
NM_025395	Chchd5	chr2	4	0	0	0.531429	0.45045	0.315789	0.65	0.449786	0.342581	0.0335524	0.00129933	5	5	4	5	179	113	38	120	7.55913	26.2438	29.7457	12.8845	36.5551
NM_181391	Chchd7	chr4	1	0	0	0.5625	NA	NA	NA	0.803619	NA	NA	NA	2	0	0	0	17	NA	NA	NA	21.8815	11.6018	1.68743	2.79024	2.02406
NM_183270	Chchd8	chr7	4	0	0	0.538922	0.5	0.402439	0.515625	0.353138	1	0.0970309	0.791007	9	9	9	8	169	192	82	128	7.25097	14.0196	18.0259	9.13862	15.2163
NM_007690	Chd1	chr17	4	0	0	0.512064	0.523077	0.347682	0.399015	0.678766	0.495193	1.32069e-07	0.00487028	17	15	18	17	373	263	307	206	7.16008	13.5755	12.4378	16.2181	9.50272
NM_026539	Chd1l	chr3	4	0	0	0.422803	0.475113	0.523404	0.477528	0.00178045	0.501245	0.514276	0.599936	15	15	15	13	428	223	242	180	8.03439	20.3905	14.5779	18.1457	12.4661
NM_001081345	Chd2	chr7	4	0	0	0.456716	0.560284	0.497006	0.548523	0.125939	0.0492075	0.956374	0.152839	19	18	19	19	338	291	338	238	20.5704	12.8587	18.0711	20.3508	16.0837
NM_146019	Chd3	chr11	1	0	0	0.8	0.615385	0.611111	NA	0.375	0.581055	0.480682	NA	1	3	4	0	5	13	18	NA	88.9379	0.81828	1.91494	3.17261	1.04057
NM_145979	Chd4	chr6	4	0	0	0.5	0.544405	0.494585	0.524752	1	0.00315738	0.781403	0.421282	17	17	17	16	582	1138	838	306	29.9243	27.693	64.6404	59.4087	23.2257
NM_173368	Chd6	chr2	4	0	0	0.524554	0.527704	0.496314	0.540323	0.321123	0.304259	0.921046	0.227554	19	19	19	18	452	383	410	250	24.9175	14.2966	19.3802	20.3895	12.303
NM_001081417	Chd7	chr4	4	0	0	0.437908	0.596774	0.548223	0.591398	0.145366	0.000222789	0.199564	0.0965652	11	11	11	9	153	378	201	95	3.09732	7.91973	37.3065	20.2905	7.92995
NM_201637	Chd8	chr14	4	0	0	0.42449	0.488889	0.504545	0.581967	0.02126	0.789797	0.946268	0.0849806	12	12	12	12	248	229	224	123	25.5131	22.9319	26.4053	29.0325	18.1984
NM_007691	Chek1	chr9	1	0	0	0.333333	NA	0	NA	0.387695	NA	0.25	NA	1	0	1	0	12	NA	3	NA	0.487841	15.2311	3.54992	3.93939	7.52454
NM_172717	Chfr	chr5	4	0	0	0.453083	0.573113	0.581818	0.475806	0.0114782	0.00300738	0.0180877	0.48494	16	16	15	16	757	428	222	250	20.9007	31.6501	24.8342	17.5231	17.5401
NM_007693	Chga	chr12	0	0	0	NA	0	NA	NA	NA	0.25	NA	NA	0	1	0	0	NA	3	NA	NA	66.3502	0.390172	0.555324	0.14127	0.0956461
[truncated: 8,214 more rows]
