# Supplementary material for: Transcriptome-Wide Survey of Mouse CNS-Derived Cells Reveals Monoallelic Expression within Novel Gene Families
Source: PubMed Central journal article supplement (PMC3285176; doi:10.1371/journal.pone.0031751), 2012-02-22

A: 2A1

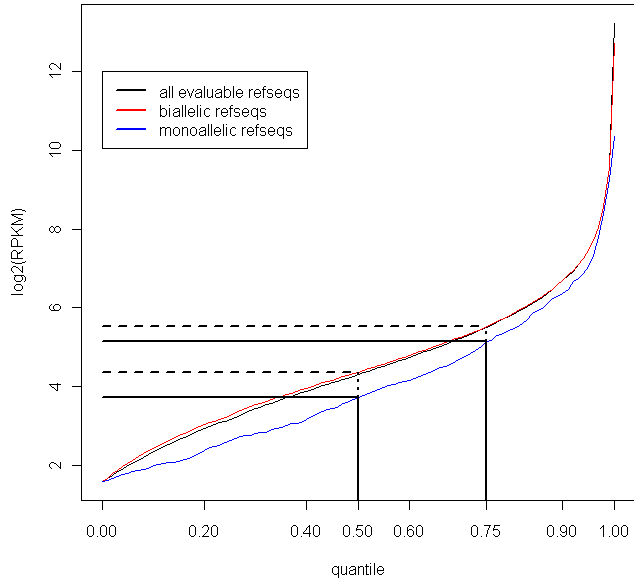

B: 2A5

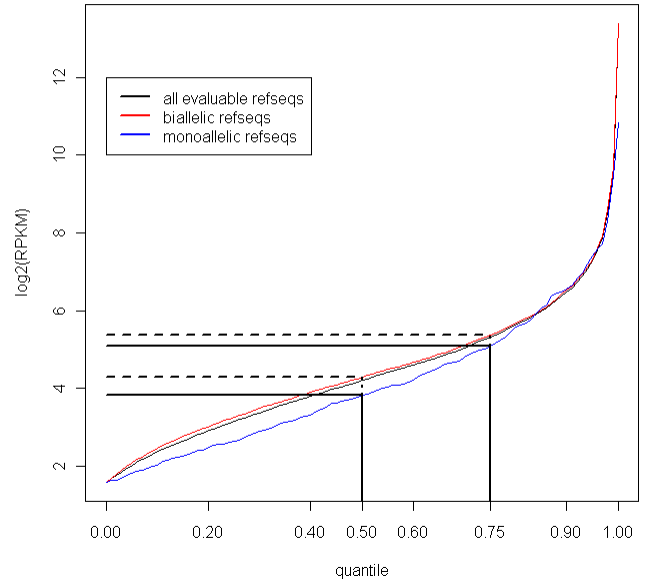

C: 3A1

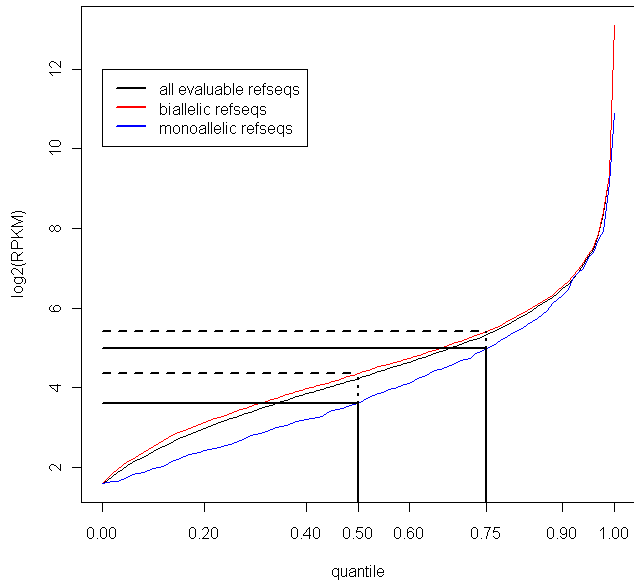

C: 4A5a

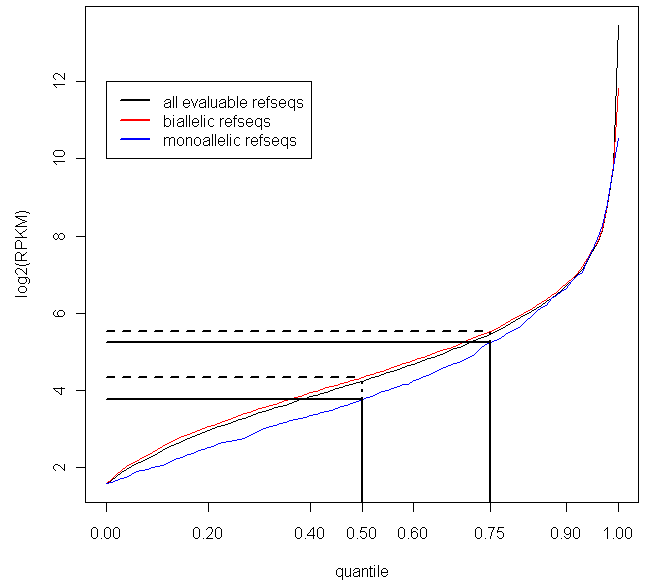

Supplement: pone.0031751.s002.pdf [file pone.0031751.s002.pdf]
