# Supplementary material for: Transcriptome-Wide Survey of Mouse CNS-Derived Cells Reveals Monoallelic Expression within Novel Gene Families
Source: PubMed Central journal article supplement (PMC3285176; doi:10.1371/journal.pone.0031751), 2012-02-22
Supplement: pone.0031751.s004.pdf [file pone.0031751.s004.pdf]

# A1

*Anxa1*

## controls

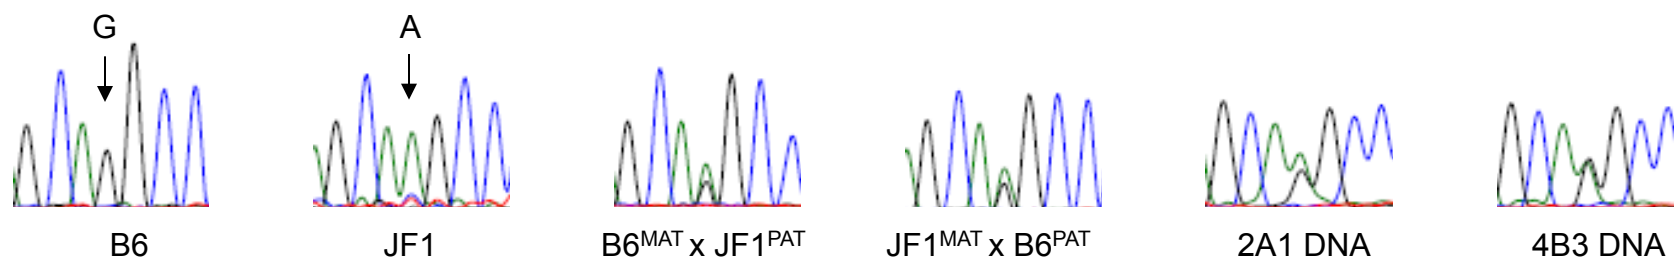

## undifferentiated NSCs

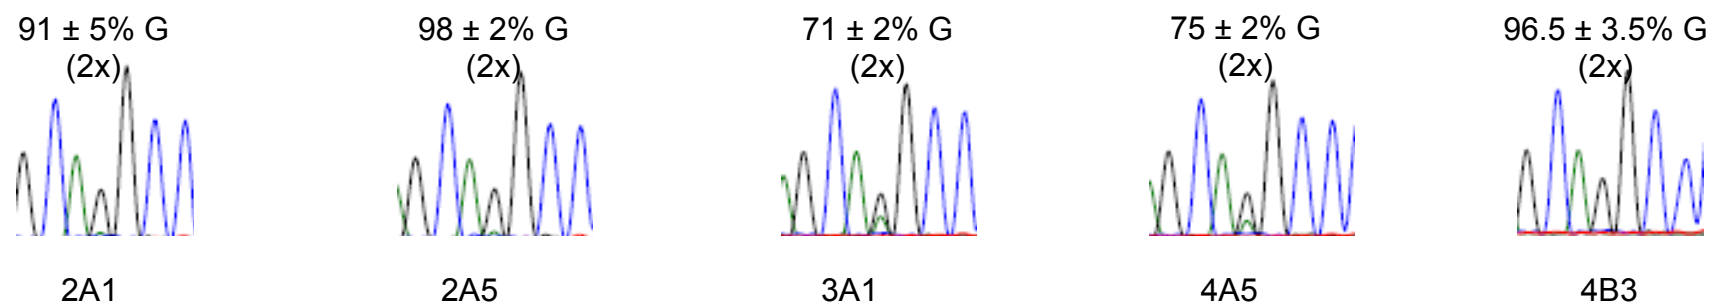

# A1

## Anxa1 (cont.)

### astrocytes

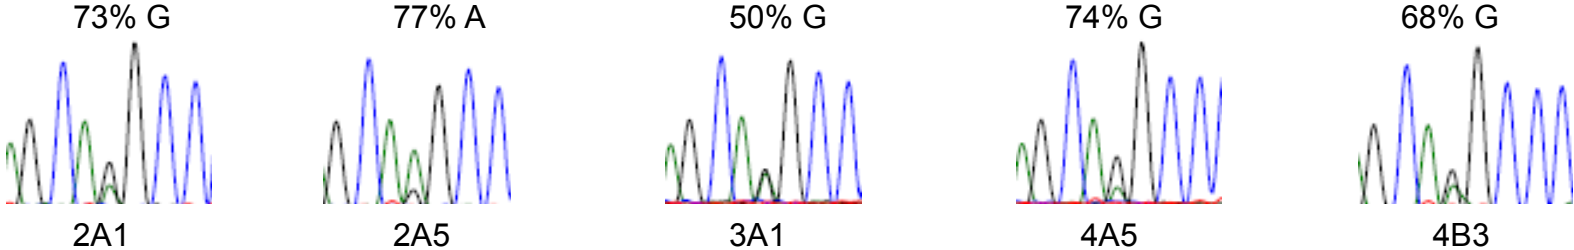

### neurons

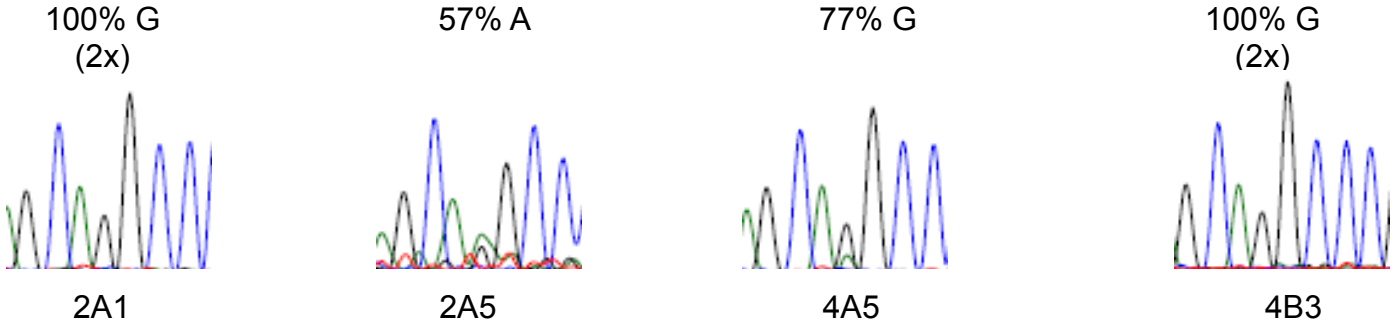

# A2

## Anxa2

### controls

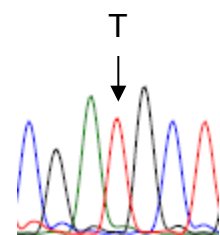

B6

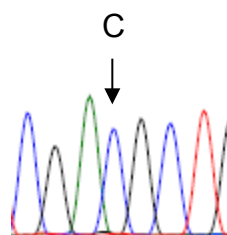

JF1

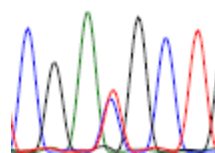

B6<sup>MAT</sup> x JF1<sup>PAT</sup>

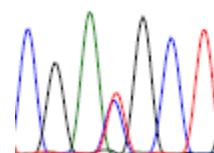

JF1<sup>MAT</sup> x B6<sup>PAT</sup>

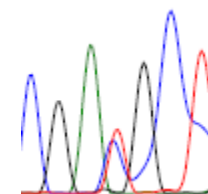

3A1 DNA

### undifferentiated NSCs

50% T  
(2x)

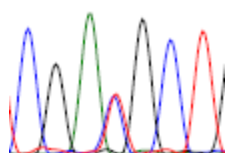

2A1

52.5 ± 0.5% T  
(2x)

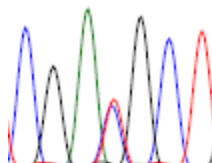

2A5

97 ± 1% T  
(2x)

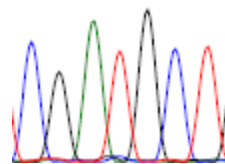

3A1

60 ± 3% T  
(2x)

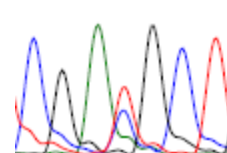

4A5

54.5 ± 0.5% T  
(2x)

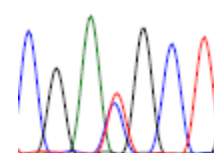

4B3

# A2

Anxa2 (cont.)

## astrocytes

50% T  
(2x)

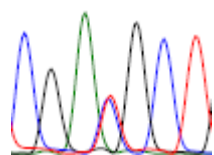

2A1

57% T  
(2x)

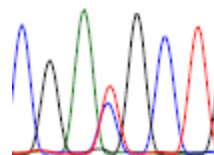

2A5

90% T  
(2x)

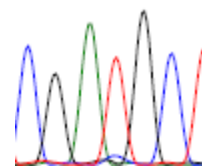

3A1

76 ± 1% T  
(2x)

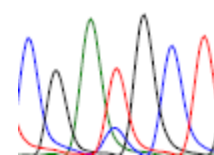

4B3

## neurons

52.5 ± 1.5% C  
(2x)

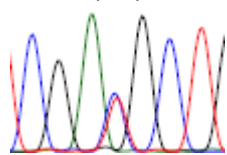

2A1

56% T  
(2x)

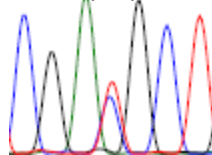

2A5

97 ± 3% T  
(2x)

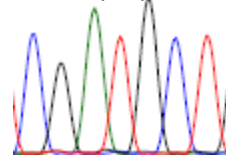

3A1

56 ± 1% T  
(2x)

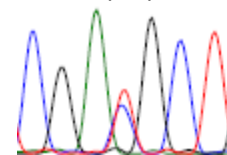

4A5

53% T  
(2x)

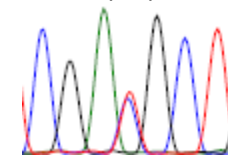

4B3

B

*Chl1*

**controls**

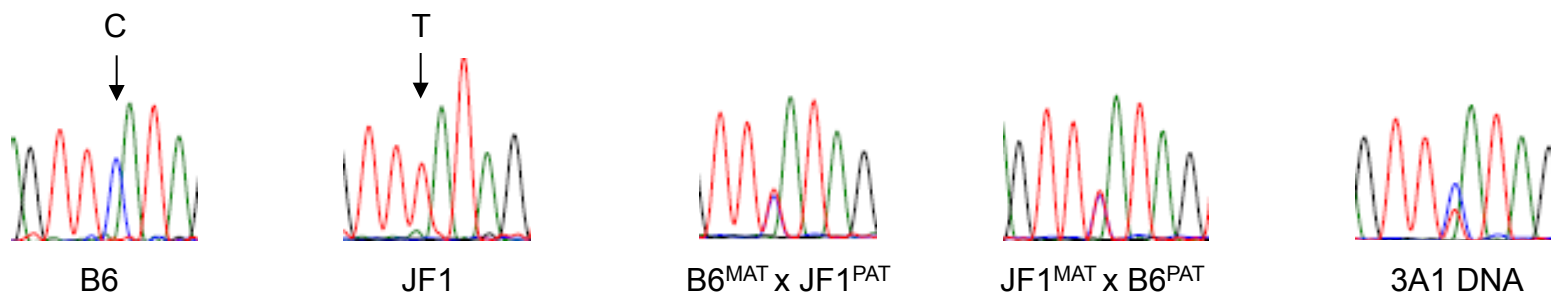

**undifferentiated NSCs**

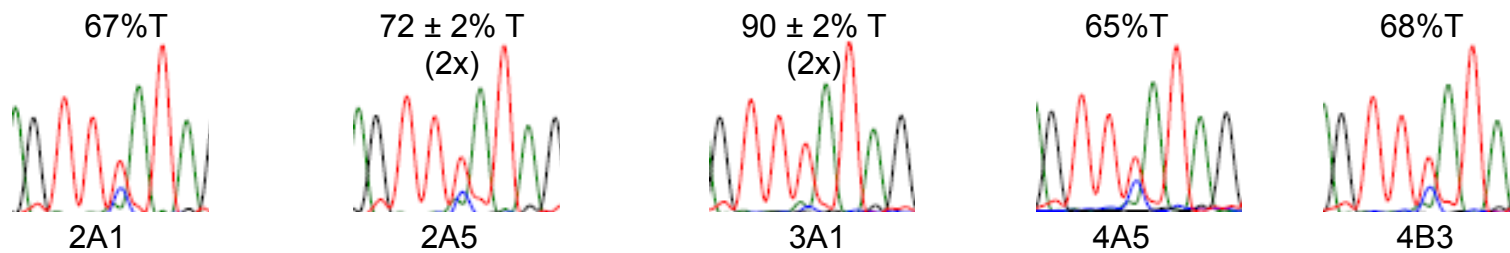

B

*Chl1* (cont.)

astrocytes

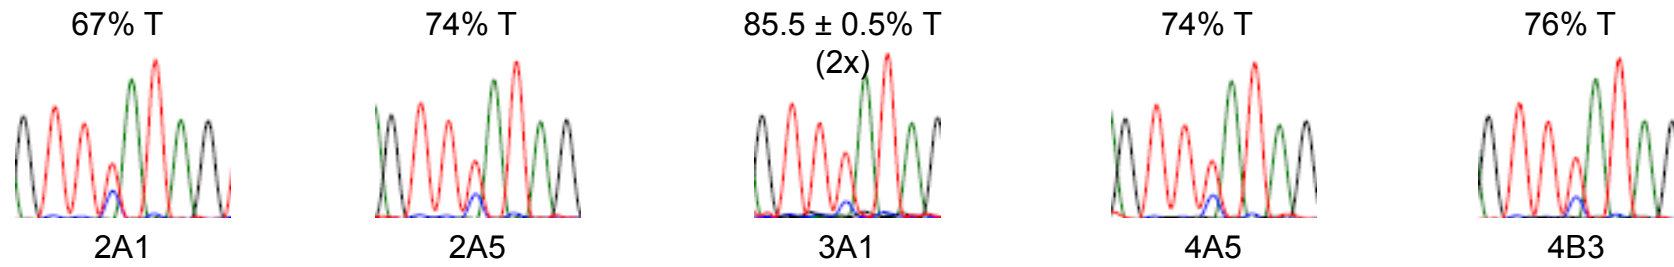

neurons

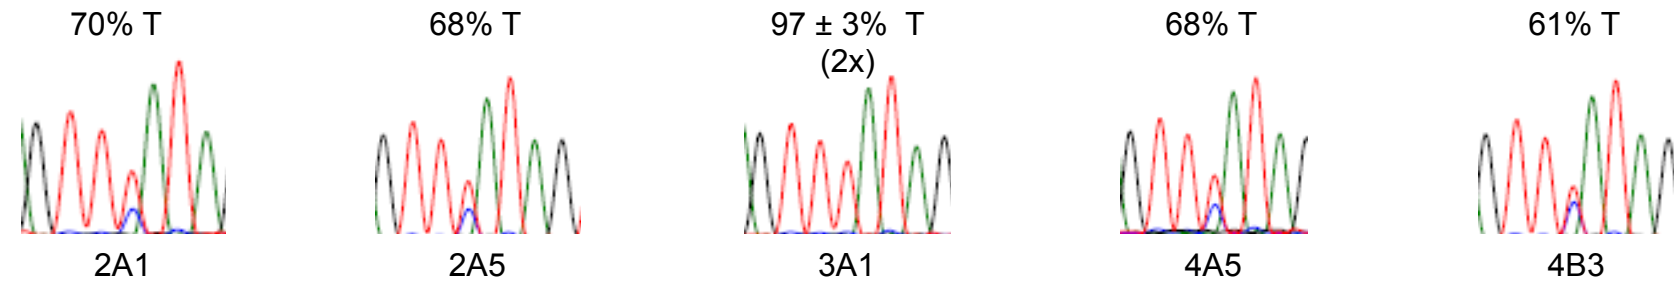

C

*Gabrg1*

**controls**

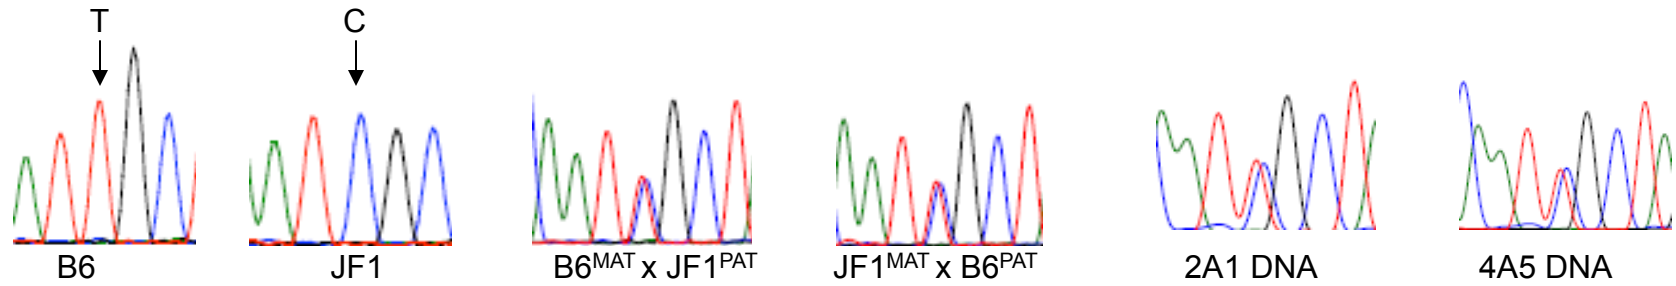

**undifferentiated NSCs**

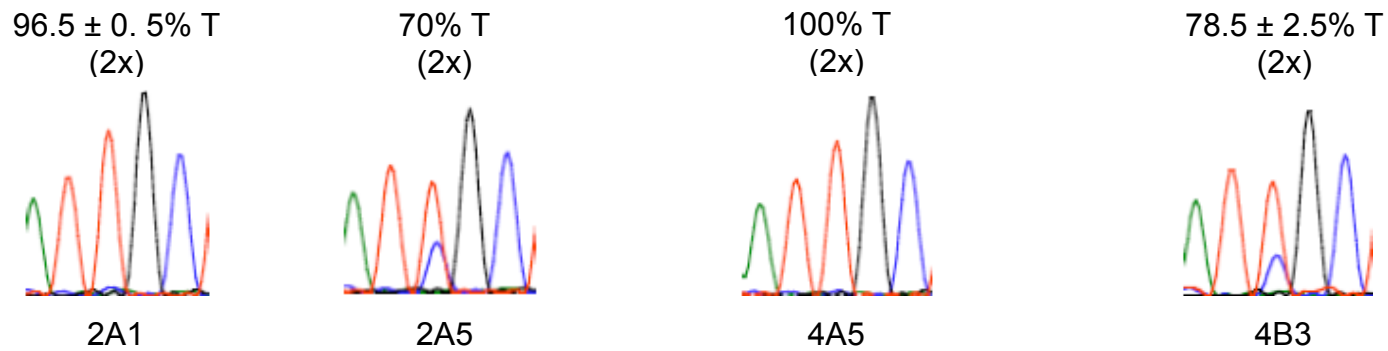

C

*Gabrg1* (cont.)

*astrocytes*

100% T  
(2x)

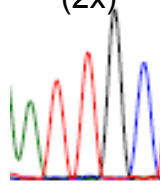

2A1

60.5 ± 0.5% T  
(2x)

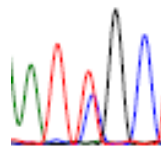

2A5

100% T  
(2x)

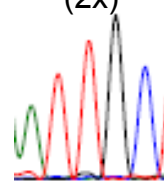

4A5

81 ± 7% T  
(2x)

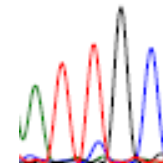

4B3

*neurons*

100% T  
(2x)

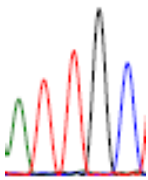

2A1

66% T  
(2x)

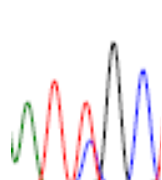

2A5

100% T  
(2x)

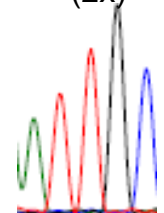

4A5

100% T  
(2x)

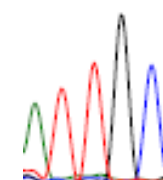

4B3



D

*Gm2a*

**controls**

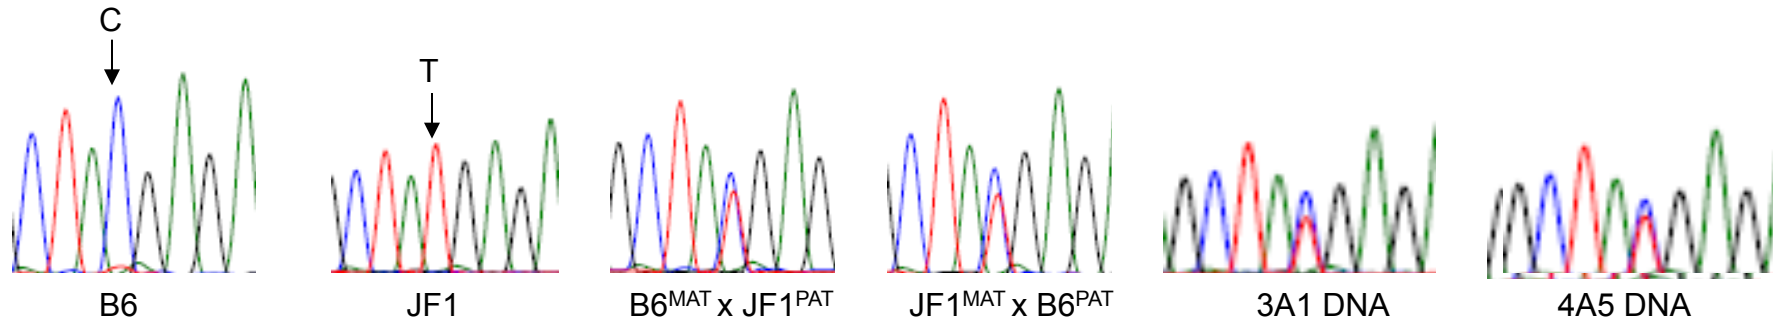

**undifferentiated NSCs**

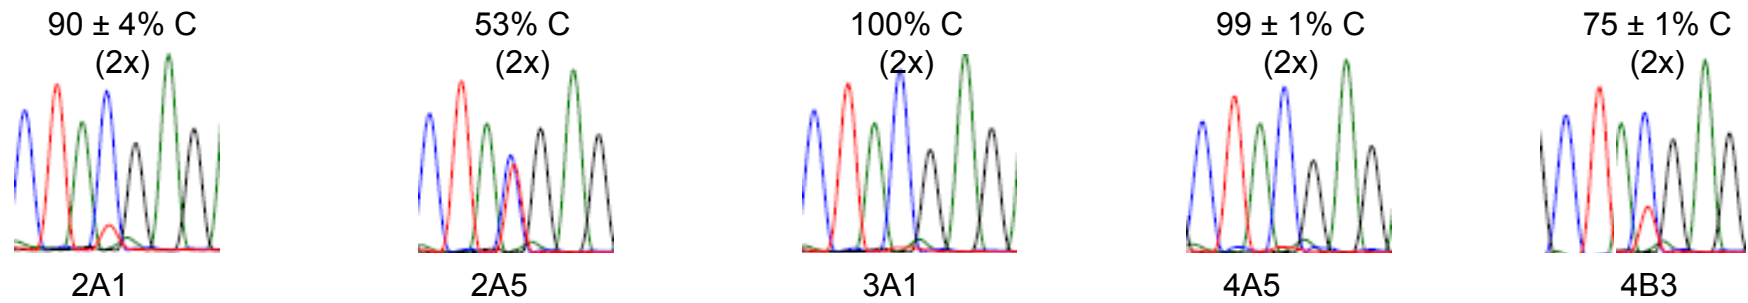

D

*Gm2a* (cont.)

**astrocytes**

98.5 ± 0.5% C  
(2x)

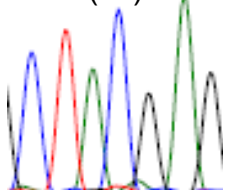

2A1

56.5 ± 3.5% T  
(2x)

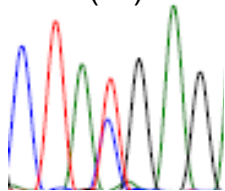

2A5

95.5 ± 0.5% C  
(2x)

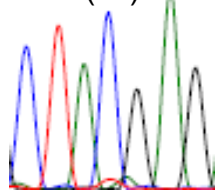

3A1

64.5 ± 3.5% C  
(2x)

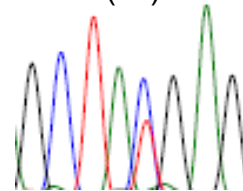

4A5

**neurons**

53.5 ± 0.5% C  
(2x)

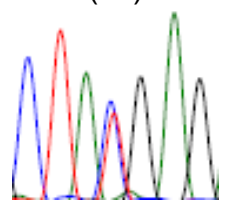

2A1

53 ± 2% C  
(2x)

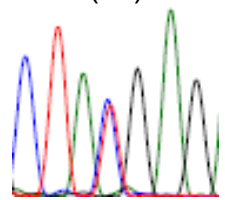

2A5

100% C  
(2x)

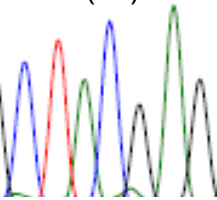

3A1

61% C  
(2x)

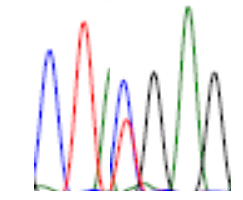

4A5

E

*Gstk1*

**controls**

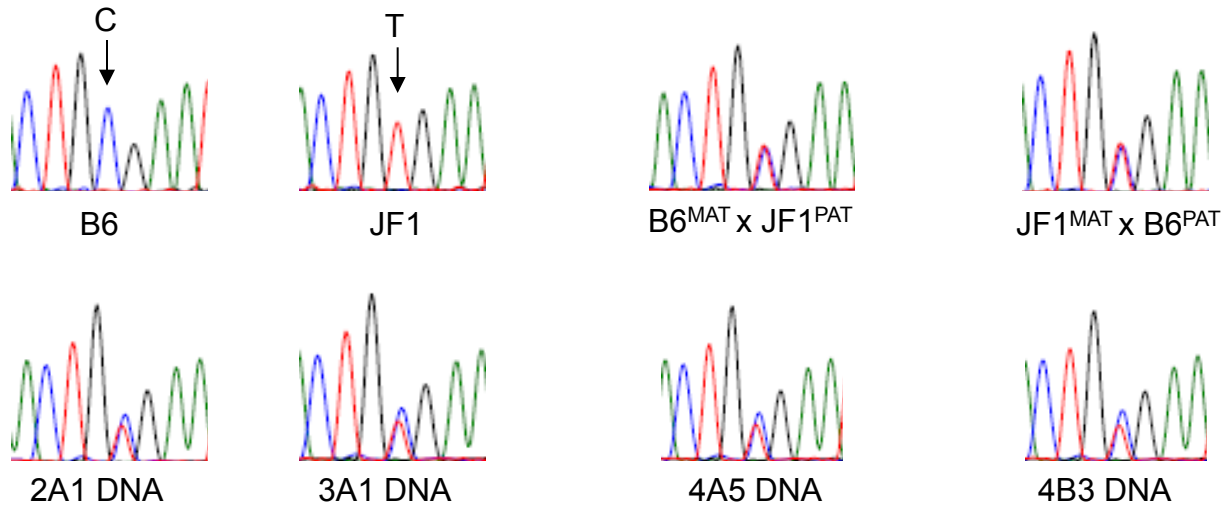

**undifferentiated NSCs**

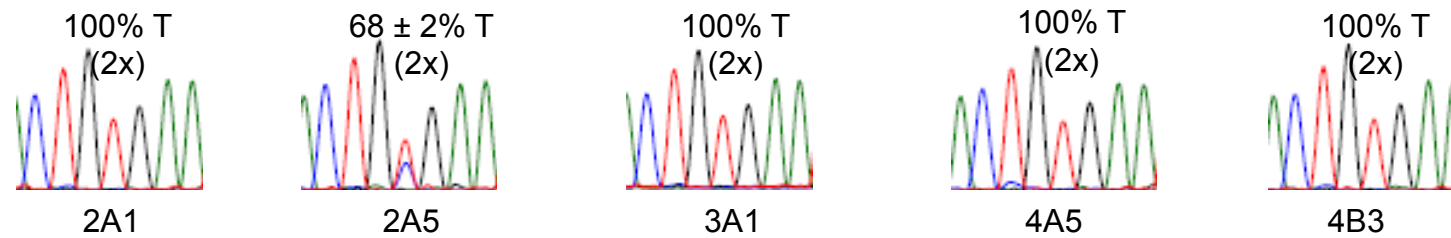

E

*Gstk1* (cont.)

*astrocytes*

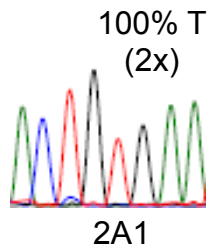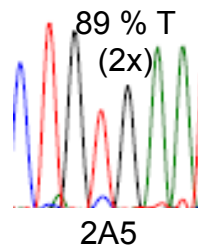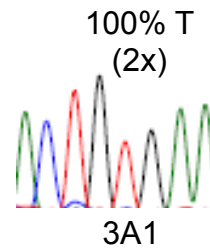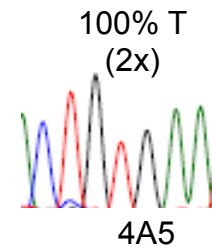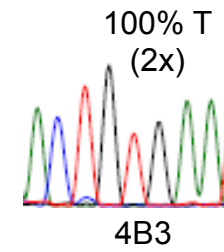

*neurons*

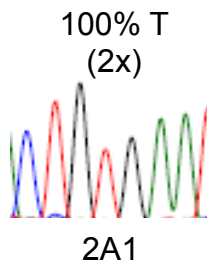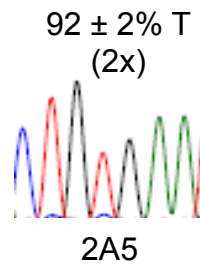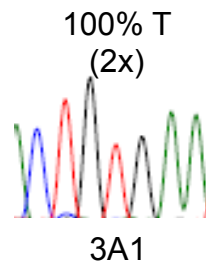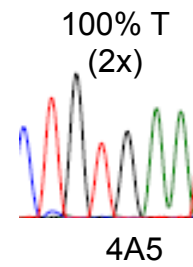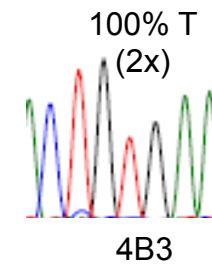

F

*Gstm5*

**controls**

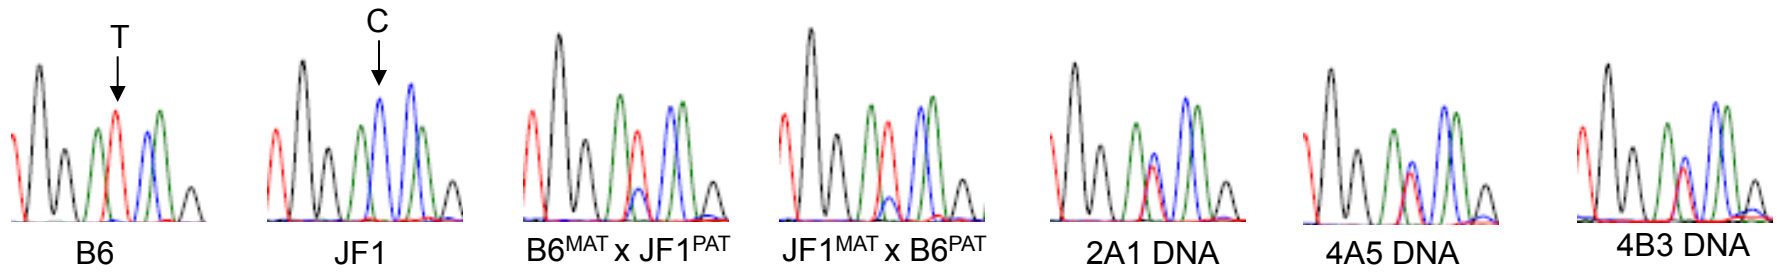

**undifferentiated NSCs**

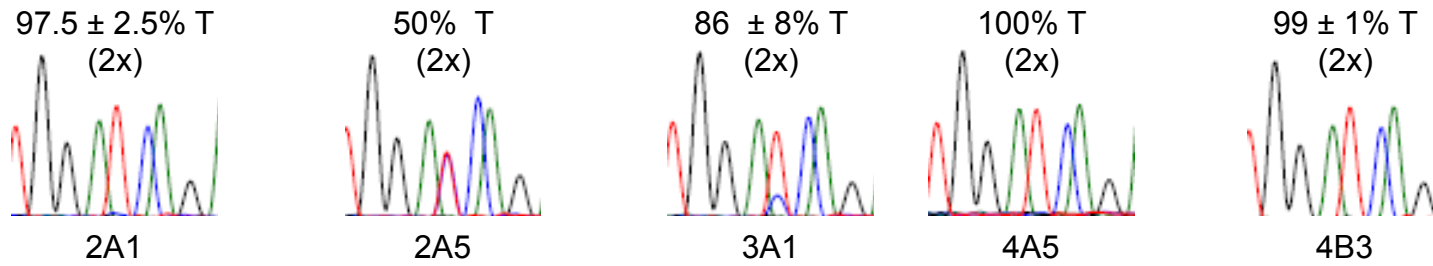

F

*Gstm5* (cont.)

**astrocytes**

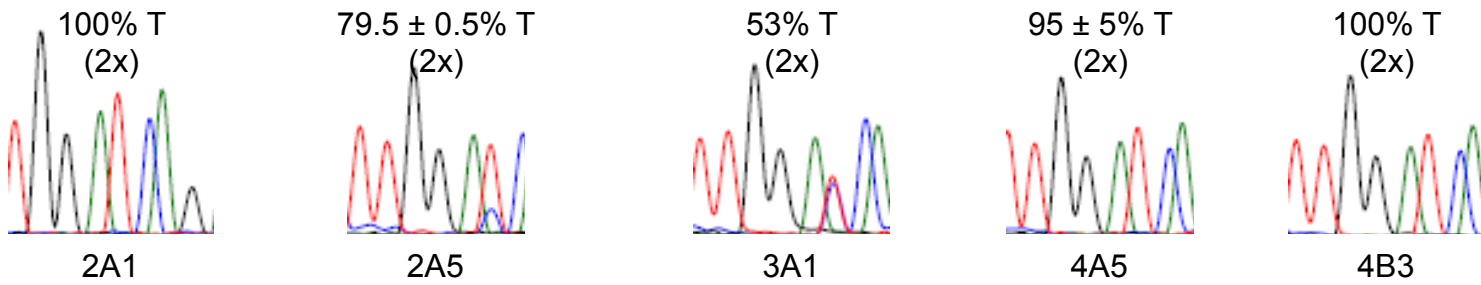

**neurons**

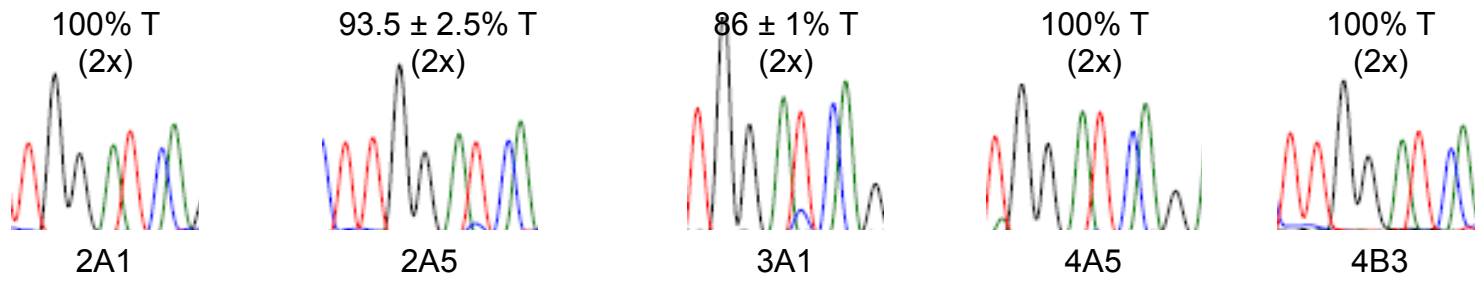

G

*Gsto1*

**controls**

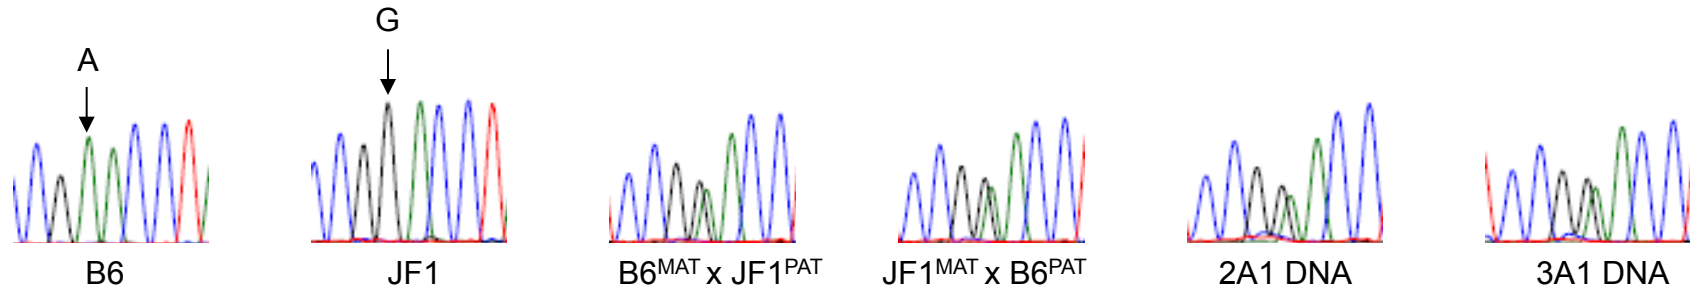

**undifferentiated NSCs**

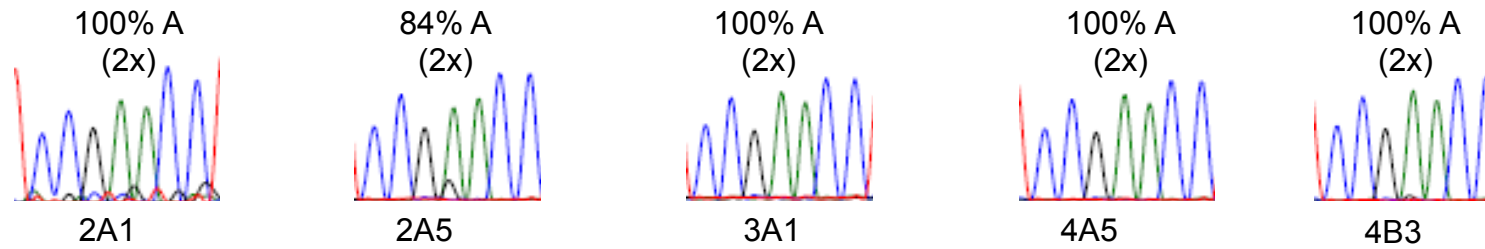

G

*Gsto1* (cont.)

**astrocytes**

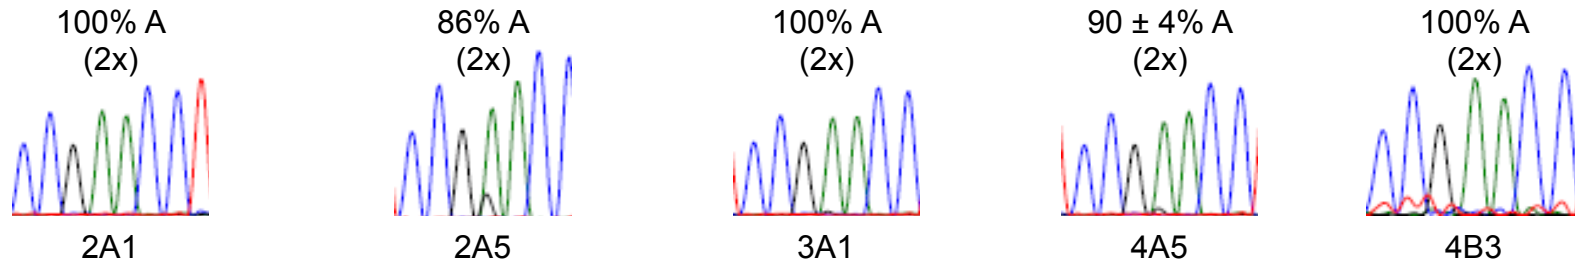

**neurons**

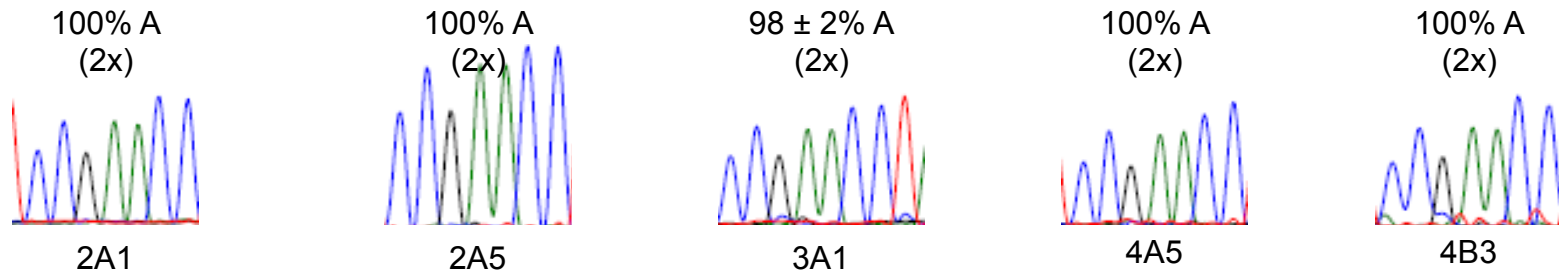



# H

*Gstp1*

**controls**

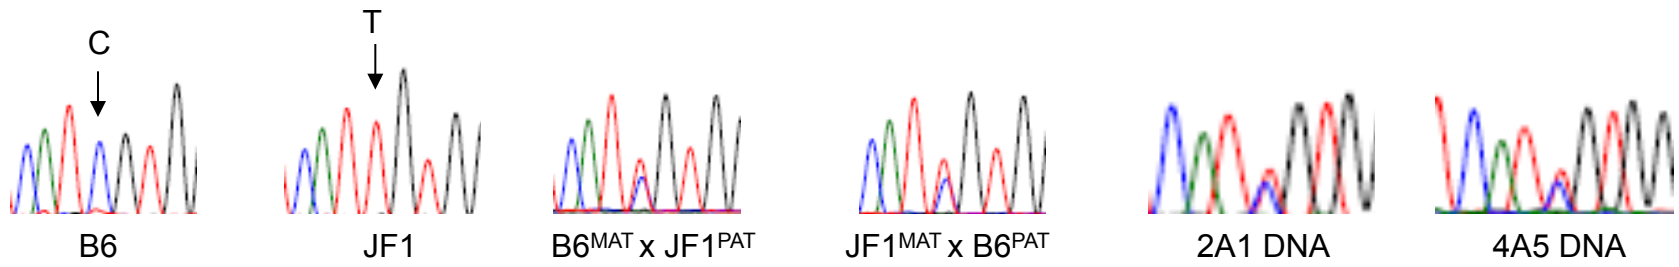

**undifferentiated NSCs**

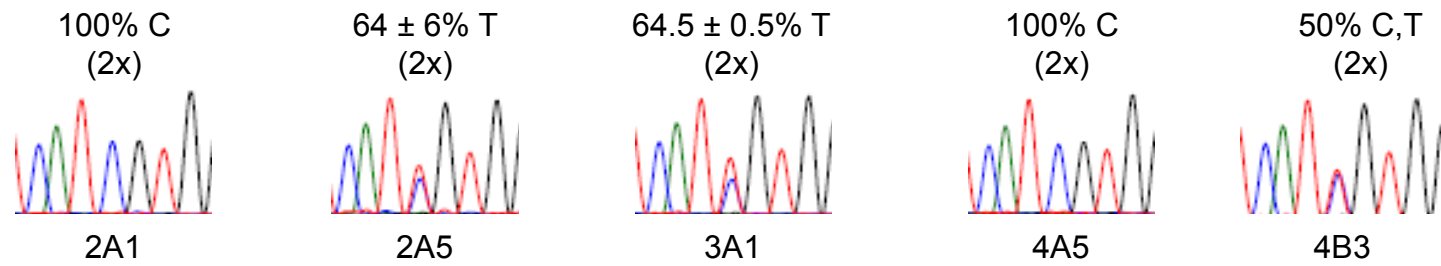

# H

*Gstp1* (cont.)

**astrocytes**

100% C  
(2x)

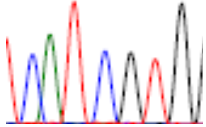

2A1

50% C,T  
(2x)

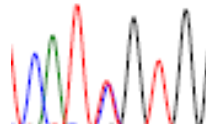

2A5

64% T  
(2x)

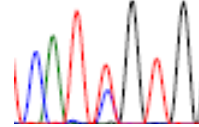

3A1

100% C  
(2x)

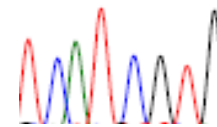

4A5

60.5 ± 0.5% T  
(2x)

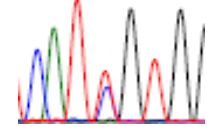

4B3

**neurons**

100% C  
(2x)

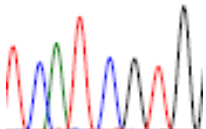

2A1

56 ± 1% C  
(2x)

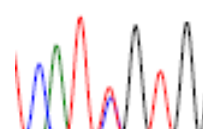

2A5

59% T  
(2x)

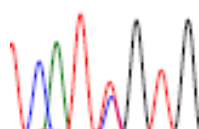

3A1

100% C  
(2x)

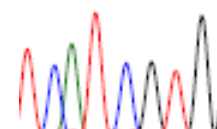

4A5

65 ± 2% C  
(2x)

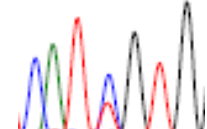

4B3

I

*Gstt1*

**controls**

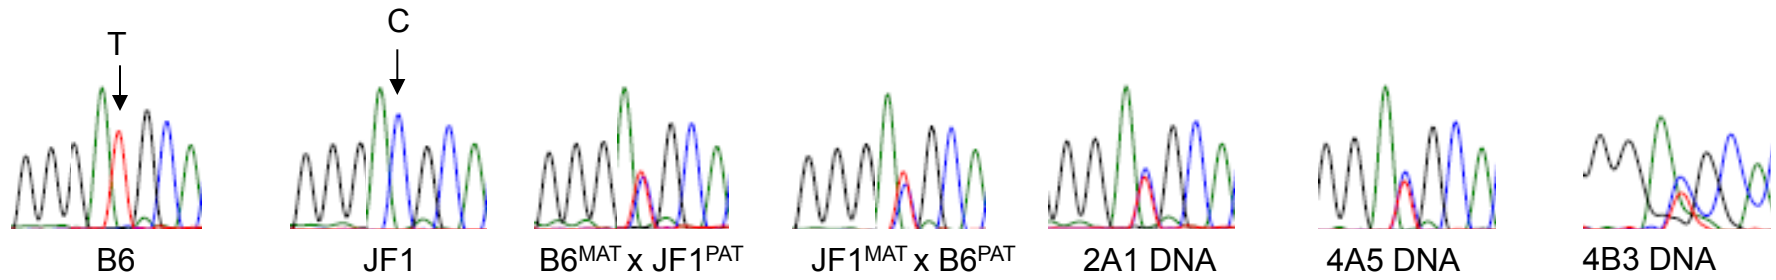

**undifferentiated NSCs**

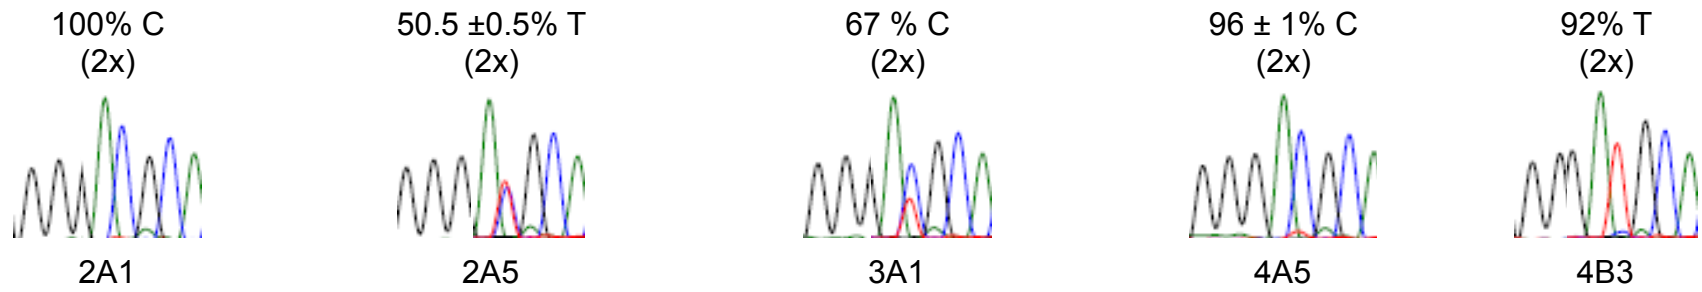

*Gstt1* (cont.)

**astrocytes**

97 ± 1% C  
(2x)

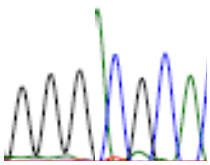

2A1

91 ± 1% T  
(2x)

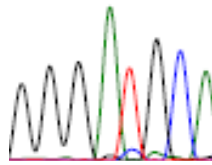

2A5

100% C  
(2x)

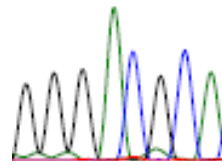

4A5

100% T  
(2x)

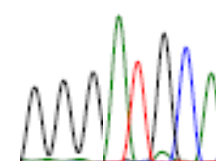

4B3

**neurons**

94% C  
(2x)

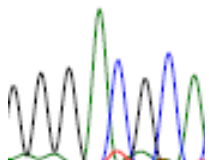

2A1

63.5 ± 0.5% T  
(2x)

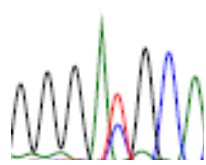

2A5

65% C  
(2x)

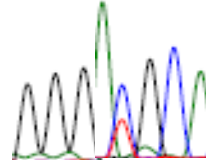

3A1

100% C  
(2x)

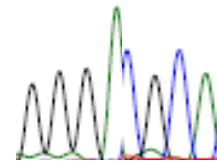

4A5

100% T  
(2x)

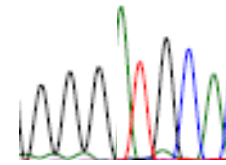

4B3

J

Hexa

**controls**

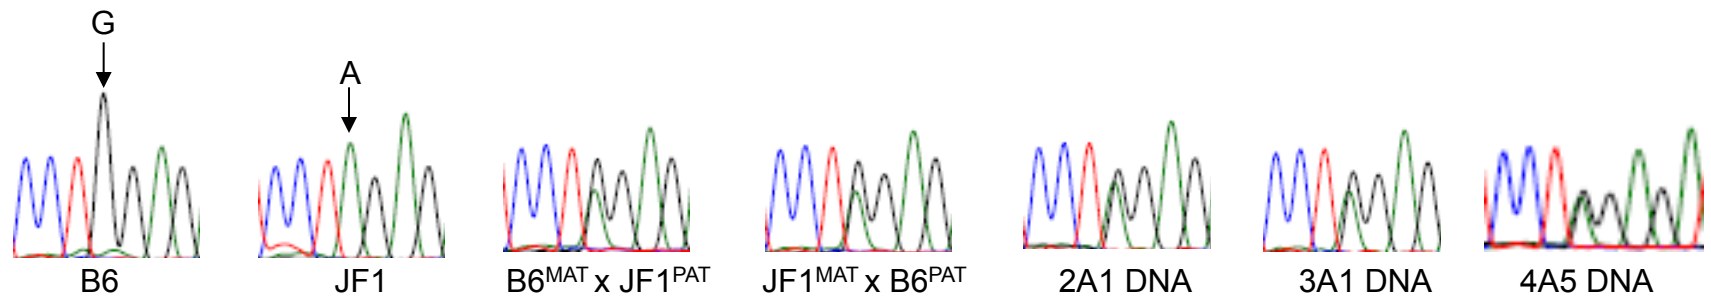

**undifferentiated NSCs**

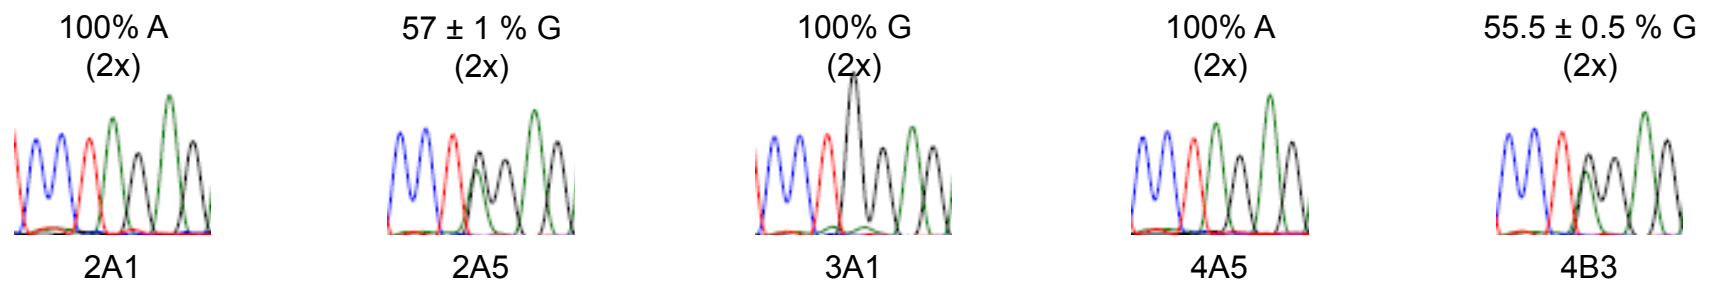

J

Hexa (cont.)

astrocytes

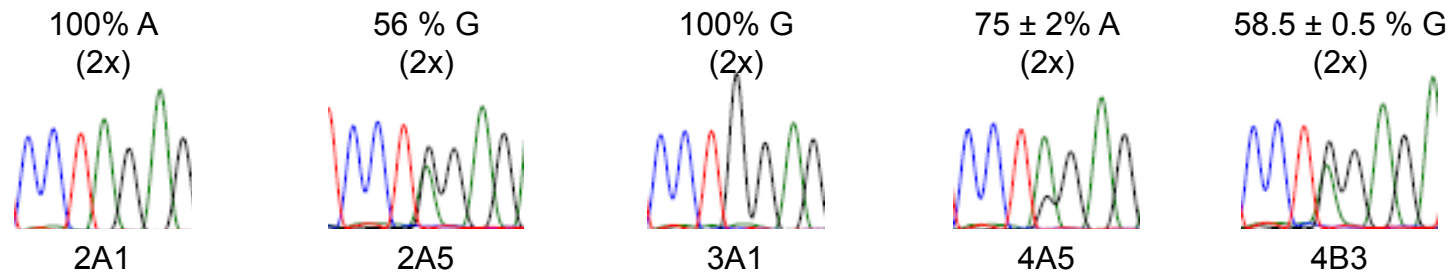

neurons

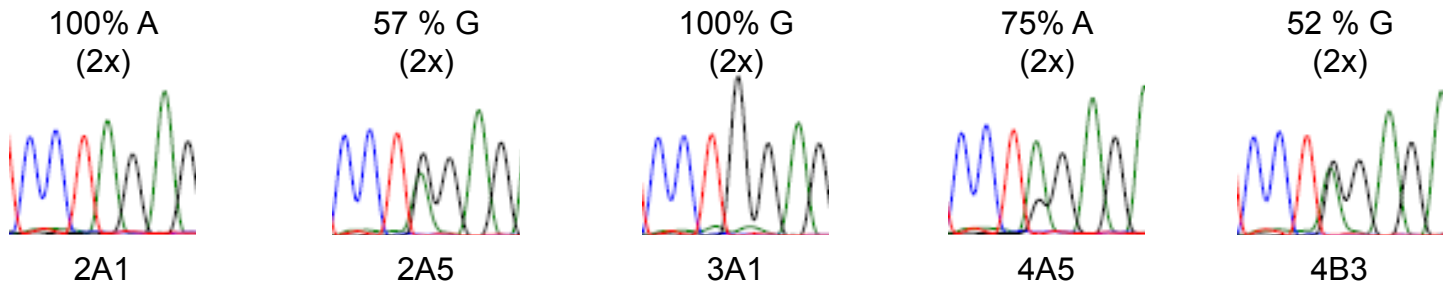

K

*Kcnma1*

**controls**

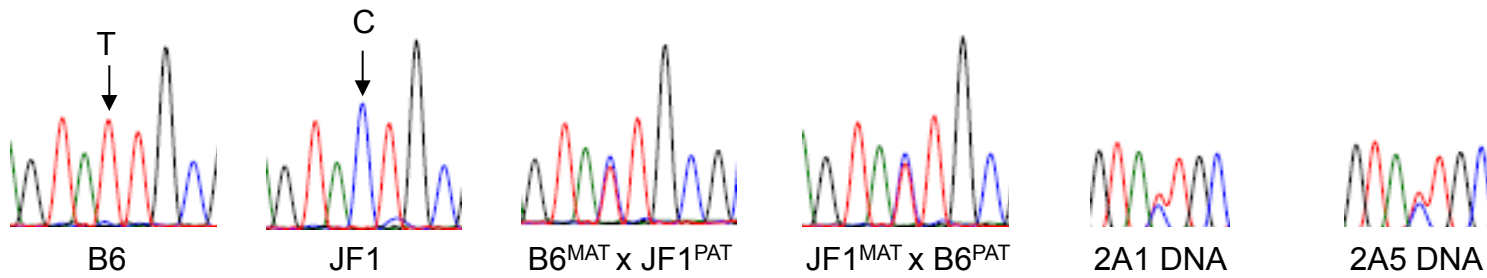

**undifferentiated NSCs**

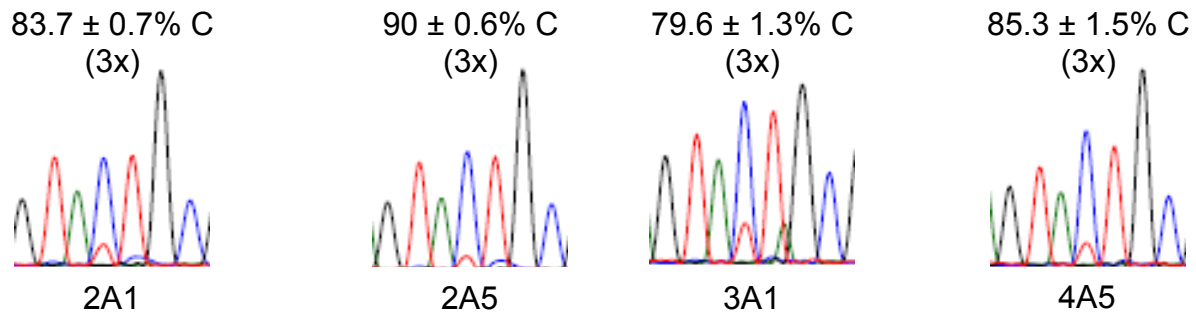

K

*Kcnma1* (cont.)

**astrocytes**

97 ± 1% C  
(2x)

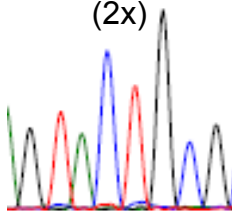

2A1

90 ± 1% C  
(2x)

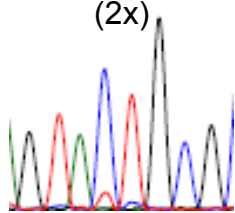

2A5

87.5 ± 1.5% C  
(2x)

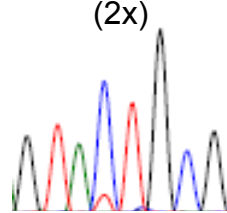

3A1

**neurons**

95 ± 1% C  
(2x)

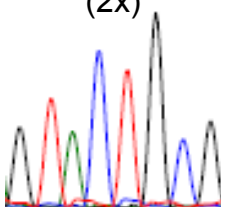

2A1

79 ± 2% C  
(2x)

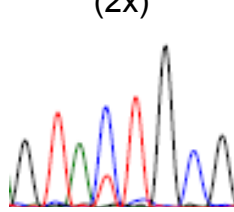

2A5

93 ± 2% C  
(2x)

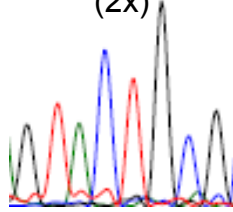

3A1

83.5 ± 0.5% C  
(2x)

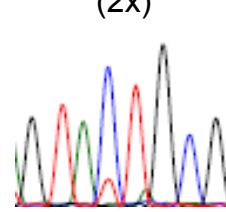

4A5



L

*Thy1*

**controls**

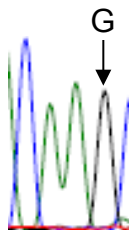

B6

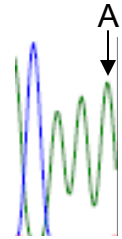

JF1

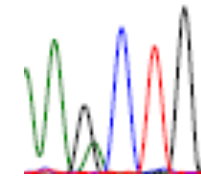

B6<sup>MAT</sup> x JF1<sup>PAT</sup>

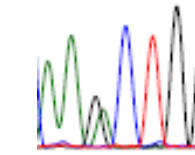

JF1<sup>MAT</sup> x B6<sup>PAT</sup>

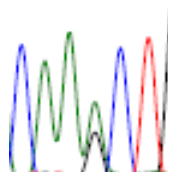

2A1 DNA

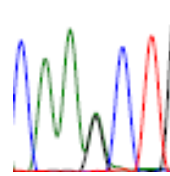

2A5 DNA

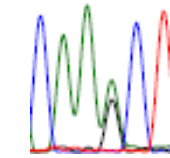

3A1 DNA

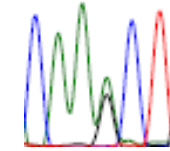

4A5 DNA

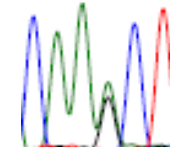

4B3 DNA

**undifferentiated NSCs**

98 ± 2% A  
(2x)

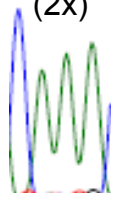

2A1

80 ± 1% G  
(2x)

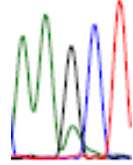

2A5

84.5 ± 5.5% A  
(2x)

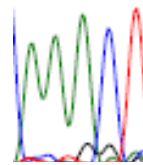

3A1

100% A  
(2x)

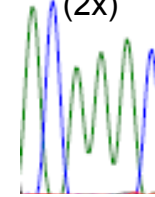

4A5

100% A  
(2x)

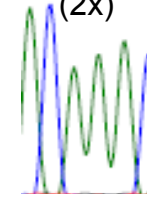

4B3

L

*Thy1* (cont.)

**astrocytes**

100% A  
(2x)

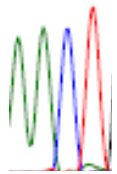

2A1

59.5 ± 0.5% G  
(2x)

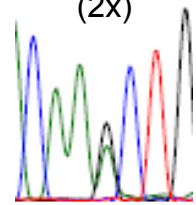

2A5

96.5 ± 0.5% A  
(2x)

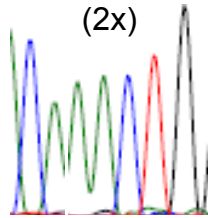

3A1

100% A  
(2x)

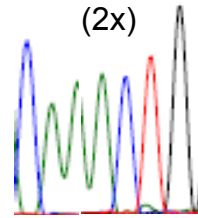

4A5

100% A  
(2x)

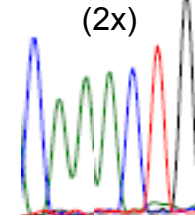

4B3

**neurons**

100% A  
(2x)

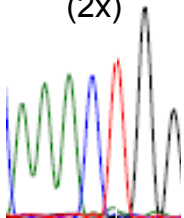

2A1

85.5 ± 0.5% G  
(2x)

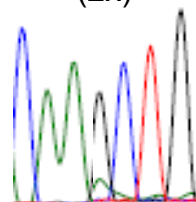

2A5

92 ± 8% A  
(2x)

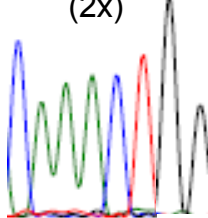

3A1

100% A  
(2x)

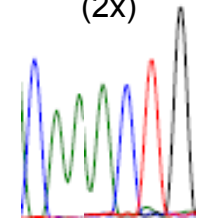

4A5

100% A  
(2x)

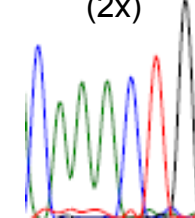

4B3
